# Supplementary material for: In vivo fluorescence lifetime imaging of macrophage intracellular metabolism during wound responses in zebrafish
Source: eLife. 2022 Feb 24;11:e66080. doi: 10.7554/eLife.66080 (PMC8871371; doi:10.7554/eLife.66080)
Supplement: Figure 1—source data 1. [file elife-66080-fig1-data1.xlsx]

## Sheet: Figure 1
Repeat	Fish	Group	F.a1.out	F.t1.out	F.t2.out	F.tm.out	N.a1.out	N.t1.out	N.t2.out	N.tm.out	rr.out	counts
1	1	Control	78.0144	235.401	1708.45	512.904	70.9017	385.99	2765.4	1072.37	0.809267	44
1	1	Control	76.9451	252.505	1832.23	567.304	67.1139	407.861	2903.03	1209.15	0.806028
1	1	Control	78.3539	222.997	1809.93	526.659	65.0501	394.128	2750.12	1215.78	0.785912
1	1	Control	75.5288	245.572	1925.33	576.338	66.1777	336.585	2733.24	1133.57	0.796228
1	1	Control	77.4537	235.1	1797.27	534.311	68.6299	372.004	2841.3	1143.56	0.80233
1	1	Control	74.7166	241.417	2052.56	633.913	65.6236	358.42	2788.18	1178.42	0.801342
1	1	Control	77.65	215.058	1677.53	502.792	65.6633	386.567	2773.67	1200.05	0.796103
1	1	Control	78.3735	216.264	1676.66	503.8	68.153	367.072	2676.85	1100.19	0.788219
1	1	Control	80.3326	212.662	1607.79	450.004	74.4998	367.206	2819.29	987.267	0.782942
1	2	Control	80.3941	152.06	1128.58	320.746	77.7747	292.428	2586.25	804.437	0.758392
1	2	Control	78.3362	235.974	1953.65	573.937	65.4621	376.304	2741.31	1194.85	0.783823
1	2	Control	81.5592	143.219	1271.92	340.63	69.4586	291.382	2685.03	1030.09	0.722556
1	2	Control	82.1482	194.723	1305.5	359.077	78.3816	334.99	2645.04	838.17	0.741778
1	2	Control	75.394	212.201	1750.74	556.714	64.3115	350.851	2761.04	1211.6	0.781865
1	2	Control	82.2651	238.179	1797.77	494.568	77.1007	370.648	2662.26	892.965	0.778133
1	2	Control	80.8472	205.987	1357.18	393.078	76.9019	328.483	2475.82	831.007	0.761428
1	2	Control	79.5137	171.523	1493.85	420.312	67.1199	320.242	2714.89	1108.35	0.762189
1	2	Control	76.5032	231.071	1855.96	580.379	62.9227	368.584	2713.83	1245.37	0.785567
1	2	Control	81.1634	232.283	1491.69	427.648	80.5813	398.715	2655.6	831.677	0.817399
1	2	Control	81.7884	222.5	1549.23	423.899	78.5708	359.786	2645.44	850.062	0.791065
1	2	Control	79.3629	207.384	1488.68	438.795	70.0179	385.498	2749.89	1101.04	0.792072
1	2	Control	74.4612	273.638	2174.74	669.063	56.4104	387.923	2932.17	1493.64	0.828426
1	2	Control	78.0819	214.116	1173.26	385.913	82.0588	372.187	2627.88	774.361	0.78975
1	2	Control	74.4612	273.638	2174.74	669.063	56.4104	387.923	2932.17	1493.64	0.828426
1	2	Control	78.0819	214.116	1173.26	385.913	82.0588	372.187	2627.88	774.361	0.78975
1	3	Control	79.5029	201.852	1611.89	451.955	70.1126	346.976	2718.98	1046.95	0.771243
1	3	Control	77.9412	252.948	1958.23	580.839	66.0216	413.523	2864.44	1233.42	0.788989
1	3	Control	80.2501	253.431	1817.05	518.591	72.0829	390.974	2801.68	1067.81	0.810091
1	3	Control	78.1843	221.886	1673.82	489.309	69.0283	383.024	2816.54	1130.59	0.781871
1	3	Control	80.1341	207.156	1680.67	463.86	64.2418	369.396	2816.37	1235.97	0.790203
1	3	Control	79.4226	186.713	1554.47	437.441	70.6813	346.617	2656.77	1028.24	0.764979
1	3	Control	78.8025	211.638	1513	447.165	71.8171	362.912	2678.66	1020.54	0.774341
1	4	Control	79.0394	235.463	1473.62	454.661	78.2942	379.072	2642.86	872.104	0.80431
1	4	Control	75.5218	274.645	2091.65	649.508	65.9855	409.431	2997.03	1272.91	0.799903
1	4	Control	76.507	270.561	2225.43	671.892	64.9424	391.874	3017.99	1300.97	0.792014
1	4	Control	76.7737	230.799	1969.12	584.645	66.3389	374.317	2934.02	1228.99	0.768732
1	4	Control	77.4815	223.591	1725.46	533.26	70.2999	372.624	2841.07	1105.72	0.768389
1	4	Control	80.6101	199.835	1116.87	336.332	83.8401	386.601	2492.94	723.574	0.801112
1	4	Control	81.2348	233.861	1446.61	419.067	82.0843	368.531	2439.61	733.95	0.789945
1	4	Control	75.8852	245.606	2029.18	620.21	63.2124	372.002	2875.98	1290.89	0.782485
1	4	Control	74.6858	262.767	1738.33	581.107	72.4049	400.256	2771.9	1060.13	0.803145
1	4	Control	75.3634	262.939	2057.76	651.932	68.0086	394.01	2882.36	1176.36	0.792261
1	4	Control	78.3506	250.177	1252.09	433.428	83.1268	388.594	2610.17	760.326	0.817121
1	4	Control	78.0378	266.589	2039.82	604.074	68.7638	378.101	2871.45	1145.54	0.790699
2	1	Control	72.5245	326.374	2056.94	731.017	66.8068	350.279	2740.4	1132.72	0.776306	46
2	1	Control	76.5868	266.94	1797.26	570.37	76.7685	315.76	2558.57	832.947	0.736661
2	1	Control	75.5168	289.565	1679.3	566.832	74.3136	329.933	2549.1	901.373	0.751278
2	1	Control	77.2273	272.069	1532.54	510.505	79.4718	302.895	2273.35	708.752	0.741121
2	1	Control	77.3262	299.569	1726.46	564.625	76.6811	352.716	2545	860.465	0.777139
2	1	Control	71.0134	292.145	1545.46	594.997	74.1599	317.188	2311.37	824.987	0.737184
2	1	Control	73.1878	324.275	1973.5	697.56	74.7922	304.061	2457.62	846.546	0.754615
2	1	Control	77.0463	293.174	1595.31	546.667	79.4401	350.409	2466.88	784.03	0.768484
2	1	Control	74.868	229.354	1416.52	486.698	77.5964	302.561	2324.57	757.173	0.75214
2	3	Control	77.7129	290.168	1736.99	535.242	73.8717	361.003	2647.94	950.545	0.779843
2	3	Control	73.6872	338.635	1983.85	691.155	69.9919	380.618	2658.4	1058.81	0.783308
2	3	Control	78.7297	289.875	1688.57	547.294	76.5177	351.783	2427.2	845.044	0.790549
2	3	Control	77.2867	291.847	1829.79	577.044	71.5866	351.044	2520.05	963.454	0.774057
2	3	Control	79.9794	312.338	1853.94	554.857	81.5524	345.157	2474.37	748.829	0.783276
2	3	Control	76.2258	291.131	1806.17	605.862	72.5736	361.044	2546.61	958.002	0.782599
2	3	Control	73.427	296.609	1957.26	667.915	69.4212	424.089	2753.34	1119.07	0.772232
2	3	Control	71.7884	282.366	2188.89	813.709	71.6	371.233	2677.36	1026.15	0.742782
2	3	Control	83.9083	263.13	1938.34	496.535	71.9845	343.357	2567.74	967.742	0.799759
2	3	Control	75.255	306.699	1991.67	673.761	72.7151	388.874	2617.68	996.492	0.781781
2	3	Control	77.655	316.819	2001.53	634.95	67.5597	368.069	2577.62	1081.34	0.777121
2	3	Control	75.6429	309.797	1839.69	617.013	69.5671	372.879	2619.4	1056.6	0.789803
2	3	Control	74.5498	295.383	1858.33	628.027	67.8722	353.652	2589.57	1071.58	0.773075
2	3	Control	85.8132	251.201	1657.11	398.343	62.5815	323.981	2643.19	1186.65	0.742223
2	3	Control	76.0869	336.096	2203.91	710.675	67.2773	373.976	2677.68	1123.78	0.781148
2	3	Control	76.0616	269.694	1740.81	553.308	69.3619	366.081	2676.48	1064.59	0.768044
2	3	Control	79.7147	241.731	1671.63	488.537	73.5274	316.797	2524.15	898.116	0.756073
2	4	Control	74.0336	269.239	1921.71	643.849	65.5627	359.26	2790.77	1190.76	0.759176
2	4	Control	78.6682	292.372	1793.85	558.592	77.6229	356.149	2601.48	856.373	0.769136
2	4	Control	74.3776	304.167	2029.36	676.972	67.7104	333.108	2578.58	1053.16	0.767149
2	4	Control	80.9808	248.293	1310.16	420.888	83.7865	340.576	2408.81	682.104	0.76203
2	4	Control	81.5114	201.4	1284.28	375.978	69.8327	292.155	2694.84	1010.56	0.747687
2	4	Control	73.1773	275.492	1899.33	667.187	68.8881	359.753	2746.02	1100.28	0.77721
2	5	Control	73.624	303.918	2161.17	739.912	63.7832	359.808	2790.21	1231.35	0.768213
2	5	Control	74.7026	302.292	1900.91	635.579	65.0766	353.619	2713.99	1192.89	0.788761
2	5	Control	74.1447	278.502	1778.27	605.34	66.2061	376.212	2724.31	1183.79	0.778918
2	5	Control	79.4491	299.941	1511.98	502.633	81.5211	353.405	2411.54	737.926	0.775578
2	5	Control	79.4803	224.406	1290.51	415.78	80.9969	292.746	2319.19	686.54	0.740448
2	5	Control	77.4403	281.201	1695.28	571.365	74.8181	340.364	2540.46	907.847	0.765728
2	5	Control	74.9075	319.587	2047.79	690.004	68.3004	327.905	2572.58	1042.3	0.755353
2	5	Control	73.8797	332.684	2024.91	695.495	68.8749	327.518	2682.14	1056.83	0.783731
2	5	Control	78.8514	359.39	1608.16	570.666	81.3504	379.476	2475.54	772.108	0.815257
2	5	Control	77.8141	249.009	1576.86	505.476	72.0625	350.377	2721.06	1006.45	0.749504
2	5	Control	73.229	355.898	2083.32	738.181	67.9914	406.942	3081.51	1183.47	0.797205
2	5	Control	72.5504	298.015	1869.81	667.32	65.4931	332.68	2642.82	1126.94	0.778285
2	5	Control	75.3023	325.979	1921.62	652.437	72.147	363.418	2680.49	1012.14	0.76868
2	5	Control	76.1481	286.668	1948.58	626.855	69.883	374.041	2911.72	1129.12	0.777174
1	1	2DG	80.0976	199.544	998.445	329.384	84.2513	383.286	2463.22	700.539	0.817386	68
1	1	2DG	80.5434	194.64	1195.65	358.353	80.902	345.741	2493.12	749.618	0.766898
1	1	2DG	79.4986	221.211	1609.63	474.571	75.2103	373.683	2820.34	971.326	0.781008
1	1	2DG	80.2665	151.164	1345.89	367.894	71.1495	297.907	2472.11	912.246	0.709778
1	1	2DG	78.3942	180.92	1210.9	367.136	80.1972	354.487	2498	779.47	0.737033
1	1	2DG	79.826	146.644	932.628	279.652	84.84	334.987	2434.59	646.153	0.742493
1	1	2DG	79.8998	199.356	1557.7	442.703	72.7415	381.674	2709.16	1005.37	0.774247
1	1	2DG	78.7745	179.404	1363.1	404.598	74.0019	363.073	2672.14	956.002	0.777176
1	1	2DG	81.5213	251.514	1617.59	457.556	77.4368	392.883	2858.56	936.932	0.814889
1	1	2DG	79.7965	208.803	1674.38	464.575	70.5816	338.345	2728.16	1034.46	0.750807
1	1	2DG	80.2354	213.101	1535.66	433.626	73.445	363.102	2595.82	953.805	0.779472
1	1	2DG	80.3629	188.089	1475.11	410.43	74.7861	337.609	2559.58	894.907	0.758276
1	1	2DG	79.0023	229.823	1673.36	484.264	74.1539	375.016	2792.17	989.274	0.774892
1	1	2DG	81.3212	198.102	1421.55	395.663	75.4642	360.941	2670.05	919.876	0.763099
1	1	2DG	79.1173	220.804	1175.59	375.324	84.4705	348.634	2314.8	628.492	0.797873
1	1	2DG	79.8501	250.65	1729.88	509.528	75.7247	401.177	2742.13	954.841	0.788579
1	1	2DG	79.6375	261.799	1978.61	539.637	72.5631	373.742	2665.28	995.382	0.795937
1	1	2DG	84.2427	245.788	1293.08	377.086	84.0026	377.368	2593.69	732.09	0.798914
1	1	2DG	80.6691	244.51	1343.42	418.659	83.03	383.797	2523.41	738.935	0.81014
1	1	2DG	77.8431	192.68	1294.93	396.281	75.7953	337.485	2529.8	861.708	0.75467
1	2	2DG	78.1978	188.867	1362.97	416.202	74.8138	344.356	2670.59	929.986	0.745141
1	2	2DG	76.9235	242.648	1877.63	566.875	65.2873	405.455	2876.59	1249.34	0.788159
1	2	2DG	79.3555	152.67	1091.01	320.338	77.0059	277.435	2473.46	781.009	0.694491
1	2	2DG	83.0176	123.28	1090.53	268.281	78.2774	295.183	2381.51	742.142	0.682243
1	2	2DG	82.6457	136.58	949.372	261.289	84.7941	327.598	2188.22	602.294	0.720514
1	2	2DG	79.5935	211.157	1550.65	443.416	73.7207	339.663	2606.56	928.222	0.751529
1	2	2DG	80.4759	133.507	1092.18	306.496	78.2099	290.257	2376.33	750.851	0.706217
1	2	2DG	81.7665	166.236	1382.48	354.973	75.6144	336.285	2694.83	906.659	0.731258
1	2	2DG	80.1059	175.702	1261.51	365.655	79.2793	306.793	2319.48	724.786	0.737913
1	2	2DG	81.4152	208.395	1436.73	408.933	75.2451	343.61	2565.21	891.19	0.76699
1	2	2DG	80.2724	192.305	1489.17	419.833	72.2325	371.875	2809.73	1039.45	0.767247
1	2	2DG	80.7992	172.28	1306.6	371.81	76.5612	326.149	2558.88	849.865	0.75216
1	3	2DG	77.0676	226.901	1911.97	564.189	65.5847	390.083	2845.6	1225.33	0.779911
1	3	2DG	78.0476	229.364	1447.96	451.666	74.3778	379.491	2651.97	957.914	0.792103
1	3	2DG	82.7311	241.257	1220.46	379.534	86.995	347.651	2169.6	578.856	0.774325
1	3	2DG	77.1908	253.229	1615.69	527.917	68.248	379.353	2634.82	1090.7	0.794975
1	3	2DG	80.1191	161.191	1363.76	369.838	75.0474	327.258	2613.28	894.547	0.737939
1	3	2DG	80.7335	198.655	1624.27	452	67.1209	315.012	2490.18	1022.71	0.746275
1	3	2DG	78.5526	200.635	1007.65	340.06	84.2049	366.148	2488.86	703.683	0.772862
1	3	2DG	82.8452	172.122	1229.58	332.197	78.5198	305.55	2442.34	774.103	0.721829
1	3	2DG	81.1892	166.366	1129.49	323.738	76.2403	324.041	2521.03	847.778	0.71873
1	3	2DG	78.7951	206.14	1399.74	420.262	79.1917	373.385	2562.49	832.135	0.773931
1	3	2DG	74.472	304.89	1857.44	630.771	69.7145	418.607	2795.8	1137.65	0.80244
1	3	2DG	80.5228	211.453	1161.79	359.893	85.2854	372.43	2365.46	672.207	0.789973
1	3	2DG	76.8485	227.463	1695.45	512.923	65.7197	379.773	2779.15	1186.58	0.775955
1	3	2DG	79.4922	195.071	1463.04	425.885	71.5367	308.989	2528.67	947.13	0.723871
1	3	2DG	83.9213	111.37	963.529	241.316	80.1964	252.196	2216.06	645.911	0.683068
1	3	2DG	80.8657	260.812	1812.9	503.186	72.6577	381.237	2698.79	1014.35	0.78975
1	3	2DG	80.2809	188.564	1428.27	401.731	73.2993	365.301	2687.26	984.985	0.771326
1	3	2DG	78.9635	221.207	1474.49	441.803	71.623	363.58	2614.46	1003.99	0.76893
1	3	2DG	78.9858	259.01	1907.34	553.454	74.5931	375.007	2732.98	969.067	0.773212
1	3	2DG	79.7241	198.269	1500.9	431.012	74.6494	365.593	2687.73	949.929	0.766553
1	3	2DG	77.9972	233.391	1750.6	518.104	70.1	383.228	2724.08	1076.64	0.792634
1	4	2DG	78.4979	228.535	1794.02	516.345	71.1592	361.993	2784.26	1052.42	0.780359
1	4	2DG	79.5417	218.646	1554.11	459.515	71.3014	353.84	2630.14	1001.52	0.785376
1	4	2DG	79.0926	40.5256	809.868	189.569	69.7578	210.195	2830.66	1002.68	0.730599
1	4	2DG	81.1071	83.9088	692.264	190.683	82.3602	245.758	2336.05	613.543	0.63571
1	4	2DG	78.8264	223.062	1749.24	512.348	69.0422	344.524	2721.56	1084.36	0.754284
1	4	2DG	79.4596	202.129	1558.05	443.617	69.3419	320.732	2743.35	1066.85	0.758089
1	4	2DG	81.2959	249.014	1307.09	403.356	79.7839	385.389	2637.86	836.815	0.829026
1	4	2DG	78.9623	223.017	1630.69	482.999	70.949	373.104	2687.08	1037.79	0.776069
1	4	2DG	77.4435	223.669	1854.35	535.11	62.3378	402.042	2904.84	1333.17	0.780007
1	4	2DG	79.562	257.205	1356.47	424.081	79.9822	396.709	2682.19	851.768	0.819535
1	4	2DG	82.1515	161.472	1128.88	292.584	83.4786	342.796	2663.95	671.781	0.845862
1	4	2DG	80.6344	219.387	1535.17	431.253	72.4402	359.277	2669.01	995.836	0.76699
1	4	2DG	78.9119	224.992	1485.86	454.156	75.1952	355.285	2653.84	921.01	0.773633
1	4	2DG	78.912	249.69	1789.01	530.926	72.8805	366.23	2657.46	989.148	0.778994
1	4	2DG	80.4365	177.406	1132.63	337.507	81.1139	300.233	2361.49	696.567	0.739773
2	1	2DG	74.043	298.64	1768.95	622.299	72.3804	343.982	2520.41	946.595	0.776028	55
2	1	2DG	79.4038	201.722	1512.46	451.312	74.4151	261.376	2432.1	824.058	0.713709
2	1	2DG	74.7398	288.007	1937.96	648.839	68.3328	341.29	2603.08	1051.51	0.763065
2	1	2DG	73.4854	286.955	1948.36	669.21	71.1285	363.367	2686.05	1035.04	0.760782
2	1	2DG	70.9527	307.201	2133.4	757.603	64.1468	368.398	2671.17	1188.56	0.760889
2	1	2DG	72.8802	317.266	2344.9	789.239	63.6981	376.334	2689.77	1207.27	0.76565
2	1	2DG	70.8782	350.463	2061.58	765.246	66.6368	368.896	2626.58	1114	0.78118
2	1	2DG	75.0166	291.29	1747.26	606.645	73.3312	359.385	2555.51	940.034	0.773111
2	1	2DG	75.3888	340.79	2039.4	701.322	71.5994	350.061	2562.23	977.74	0.777539
2	1	2DG	77.8381	277.9	1783.67	572.379	75.3023	350.03	2558.05	888.463	0.767472
2	1	2DG	74.4577	322.861	2032.88	690.7	70.2373	375.909	2647.5	1045.04	0.784547
2	1	2DG	70.6581	277.199	1985.64	700.674	67.0584	378.27	2694.64	1135.3	0.780449
2	1	2DG	74.0742	363.851	2048.69	709.725	71.825	373.211	2632.07	1009.01	0.796482
2	1	2DG	78.1314	335.329	2041.18	641.772	73.6129	339.129	2507.06	910.269	0.783204
2	2	2DG	70.1507	310.586	1841.99	664.396	67.8261	360.307	2533.3	1057.34	0.781189
2	2	2DG	75.3319	257.874	1620.06	542.671	74.5539	350.395	2599.16	921.731	0.752496
2	2	2DG	77.4219	275.018	1676.21	545.384	74.3388	309.876	2459.15	864.975	0.75632
2	2	2DG	75.9625	269.667	1674.14	565.374	75.912	327.328	2499.42	852.545	0.740803
2	2	2DG	70.863	322.112	1963.73	719.829	65.0133	348.775	2632.62	1153.58	0.764919
2	2	2DG	76.6649	336.025	1991.37	659.206	74.1744	351.3	2580.19	926.891	0.783901
2	2	2DG	73.7481	339.623	2121.85	734.331	68.8823	383.861	2728.58	1101.82	0.793002
2	2	2DG	73.8173	306.832	2032.77	694.246	63.8119	337.714	2624.26	1161.63	0.776123
2	2	2DG	61.9997	494.708	1903.01	932.307	66.4903	383.862	2231.57	982.354	0.715872
2	3	2DG	74.1976	327.78	2009.35	686.1	71.9099	341.439	2619.26	976.755	0.770918
2	3	2DG	79.9007	279.503	1460.25	475.245	82.8695	337.091	2331.65	679.935	0.772296
2	3	2DG	76.3824	285.074	1771.01	578.478	74.4747	330.457	2417.77	867.643	0.749193
2	3	2DG	75.5194	333.231	1871.43	650.117	76.9177	342.472	2542.38	849.92	0.757106
2	3	2DG	76.4649	310.942	1857.14	614.982	75.0289	367.857	2600.59	924.528	0.773285
2	3	2DG	80.0693	333.273	1738.2	571.358	80.478	366.595	2569.07	798.983	0.786646
2	3	2DG	79.5657	326.614	1643.89	532.573	83.3078	364.529	2550.93	730.862	0.78818
2	3	2DG	81.7154	338.462	1945.63	579.841	83.9123	366.127	2517.98	708.442	0.774527
2	3	2DG	78.589	252.26	1716.87	517.96	72.5624	327.949	2651.51	964.275	0.760287
2	3	2DG	75.2239	325.401	2292.15	753.697	71.3835	372.653	2581.2	999.586	0.787984
2	3	2DG	76.7507	291.088	1803.72	595.28	73.5914	318.996	2447.4	889.744	0.749016
2	3	2DG	78.7363	267.52	1721.88	533.482	75.5203	371.762	2722.52	939.409	0.748789
2	3	2DG	76.9883	290.486	1551.61	531.162	78.7061	345.862	2535.95	811.355	0.780253
2	3	2DG	80.9955	299.761	1465.62	473.623	83.3828	359.026	2445.72	706.103	0.774746
2	4	2DG	78.1912	297.889	1689.57	554.962	77.5842	348.003	2510.1	834.017	0.775197
2	4	2DG	77.6125	219.377	1629.54	497.67	73.3332	317.742	2566.05	919.713	0.722903
2	4	2DG	75.0751	317.08	2030.98	684.596	71.3821	351.214	2645.85	1001.91	0.780502
2	4	2DG	73.5019	251.34	1611.68	554.215	67.0843	290.889	2596.73	1025.32	0.713048
2	4	2DG	73.848	260.152	1865.88	611.538	68.9202	353.831	2688.78	1074.22	0.755795
2	4	2DG	75.351	341.973	2105.45	704.238	71.6395	361.273	2618.5	998.287	0.775755
2	4	2DG	75.6163	250.254	1708.45	559.265	71.0654	317.066	2591.9	970.334	0.739414
2	4	2DG	75.5358	293.574	1760.02	611.046	72.7131	357.884	2615.23	974.06	0.773144
2	4	2DG	78.1148	284.658	1826.75	574.192	73.7325	327.874	2518.63	906.966	0.739565
2	5	2DG	78.9689	296.555	1592.52	509.52	78.2518	315.756	2469.59	785.265	0.75505
2	5	2DG	81.1436	187.164	1488.47	425.094	75.2413	289.276	2259.62	779.312	0.739473
2	5	2DG	79.5967	238.725	1478.31	459.084	76.4245	313.676	2450.98	816.478	0.755141
2	5	2DG	77.6714	226.621	1489.51	469.04	76.0108	259.925	2375.91	770.696	0.727172
2	5	2DG	75.233	215.354	1290.17	447.41	77.5004	280.266	2301.34	738.731	0.710853
2	5	2DG	78.1173	273.877	1630.84	511.81	79.3816	335.906	2509.08	781.836	0.774318
2	5	2DG	75.9662	252.185	1679.11	551.207	71.5357	298.34	2562.86	950.546	0.732453
2	5	2DG	76.3607	276.275	1803.13	587.449	73.4802	340.144	2562.57	927.087	0.760677
2	5	2DG	74.8885	286.252	1764.5	590.995	72.6251	320.309	2600.89	945.554	0.762381

## Sheet: FLIM statistics
Statistical results of zebrafish autofluorescence data
Mean +/- 95%CI
Comparison between groups showing the overall effect; computed as fold change (ratio) or simple difference with 95%CI and p values; p<0.05
FIGURE 1	NAD(P)H tm (ps)	NAD(P)H t1 (ps)	NAD(P)H t2 (ps)	NAD(P)H a1 (%)	FAD tm (ps)	FAD t1 (ps)	FAD t2 (ps)	FAD a1 (%)	Optical redox ratio
Control	1007 (957, 1059)	358 (347, 370)	2668 (2619, 2718)	71.2 (69.8, 72.6)	538 (502, 577)	255 (241, 269)	1720 (1626, 1819)	77.3 (76.4, 78.2)	0.78 (0.77, 0.78)
2-DG	904 (855, 955)	344 (332, 355)	2569 (2531, 2608)	74.2 (72.3, 76.3)	489 (457, 523)	238 (223, 253)	1574 (1496, 1656)	77.8 (76.7, 78.9)	0.76 (0.75, 0.77)
2DG / Ctrl; p value	0.90 (0.83, 0.97); 0.008	0.96 (0.92, 1.00); 0.067	0.96 (0.94, 0.99); 0.004	1.04 (1.01, 1.08); 0.018	0.91 (0.82, 1.00); 0.054	0.93 (0.86, 1.01); 0.094	0.91 (0.85, 0.99); 0.026	1.01 (1.01, 1.03); 0.458	0.98 (0.96, 0.99); 0.007
