# Supplementary material for: In vivo fluorescence lifetime imaging of macrophage intracellular metabolism during wound responses in zebrafish
Source: eLife. 2022 Feb 24;11:e66080. doi: 10.7554/eLife.66080 (PMC8871371; doi:10.7554/eLife.66080)
Supplement: Figure 2—source data 1. [file elife-66080-fig2-data1.xlsx]

## Sheet: Figure 2
N.a1.out	N.t1.out	N.t2.out	N.tm.out	Group	Repeat	Fish	GFP	counts
70.476	229.299	2672.13	946.361	Control neg	1	1	0	88
69.9482	326.289	2374.48	933.691	Control neg	1	1	0
67.6994	191.587	2243.03	852.703	Control neg	1	1	0
66.4261	666.149	4083.36	1509.39	Control neg	1	1	0
66.0876	177.281	2340.91	911.52	Control neg	1	1	0
71.4235	245.663	1996.49	745.905	Control neg	1	1	0
72.7699	242.803	2032.19	728.045	Control neg	1	1	0
68.7672	252.341	2370.65	909.721	Control neg	1	1	0
67.8796	228.487	2180.85	852.635	Control neg	1	1	0
72.6885	241.806	2500.8	864.999	Control neg	1	2	0
63.1216	347.276	2309.32	1063.33	Control neg	1	2	0
77.4874	225.839	1904.4	600.344	Control neg	1	2	0
70.7035	260.957	2252.05	841.085	Control neg	1	2	0
68.8377	277.535	2420.13	938.915	Control neg	1	3	0
67.2575	214.092	2393.87	929.776	Control neg	1	3	0
68.8436	236.259	2311.11	879.109	Control neg	1	3	0
67.9929	251.961	2344.78	911.508	Control neg	1	3	0
91.8307	399.16	1058.47	480.24	Control neg	1	3	0
75.3635	558.358	8342.25	1081.51	Control neg	1	3	0
77.9948	378.143	2625.03	616.246	Control neg	1	3	0
77.819	537.495	3708.14	1004.42	Control neg	1	3	0
49.975	261.859	3394.3	466.659	Control neg	1	3	0
43.5382	278.154	1524.65	692.994	Control neg	1	3	0
58.6382	277.041	3022.64	693.076	Control neg	1	3	0
79.802	289.079	3604.72	571.723	Control neg	1	3	0
50.0065	403.905	966.995	629.666	Control neg	1	3	0
81.7289	419.231	3088.32	824.542	Control neg	1	3	0
80.6967	290.273	1983.66	536.155	Control neg	1	3	0
79.2448	230.107	1416.1	459.974	Control neg	1	3	0
76.7507	200.204	1438.68	425.924	Control neg	1	3	0
77.1666	412.37	1447.48	626.313	Control neg	1	3	0
77.5944	263.032	1355.41	495.424	Control neg	1	3	0
76.995	447.423	1612.9	681.255	Control neg	1	3	0
85.2065	248.7	1960.93	464.684	Control neg	1	3	0
80.8451	323.535	2007.08	597.711	Control neg	1	3	0
77.2284	246.931	1902.99	497.905	Control neg	1	3	0
80.6147	273.059	2197.42	495.627	Control neg	1	3	0
81.033	326.001	2487.43	607.173	Control neg	1	3	0
76.8605	296.976	2515.22	593.055	Control neg	1	3	0
72.9511	305.543	3281.8	543.634	Control neg	1	3	0
81.3299	486.919	2456.12	811.527	Control neg	1	3	0
78.5495	354.502	2312.23	674.093	Control neg	1	3	0
74.1901	276.929	2388.48	551.088	Control neg	1	3	0
79.9803	406.673	5549.53	751.977	Control neg	1	3	0
73.4628	282.432	1645.8	529.187	Control neg	1	3	0
64.4495	437.835	1640.36	753.758	Control neg	1	3	0
67.2734	329.841	1497.12	606.484	Control neg	1	3	0
63.1583	436.434	1897.14	760.286	Control neg	1	3	0
66.526	232.853	2417.83	587.345	Control neg	1	3	0
71.278	279.451	2126.71	577.868	Control neg	1	3	0
73.8837	494.231	4646.74	780.781	Control neg	1	3	0
78.158	649.726	3207.73	1098.48	Control neg	1	3	0
72.3381	404.473	7137.47	1084.32	Control neg	1	3	0
57.685	341.277	1862.81	628.19	Control neg	1	3	0
69.4654	324.206	2481.97	603.836	Control neg	1	3	0
63.5348	447.317	5314.88	780.847	Control neg	1	3	0
99.9832	936.296	2438.48	936.549	Control neg	1	3	0
74.293	778.16	3082.14	1210.5	Control neg	1	3	0
70.4049	347.127	1891	645.468	Control neg	1	3	0
65.1069	482.074	1544.46	675.227	Control neg	1	3	0
72.9031	503.28	2052.84	810.213	Control neg	1	3	0
61.5146	456.024	2120.78	796.934	Control neg	1	3	0
95.8263	120.485	3030.78	255.98	Control neg	1	3	0
27.6117	190.494	1229.45	639.006	Control neg	1	3	0
31.9558	317.587	381.288	365.421	Control neg	1	3	0
87.2036	620.392	4263.06	1005.63	Control neg	1	3	0
78.5697	955.303	3943.15	1539.14	Control neg	1	3	0
99.9137	609.955	1241.07	610.5	Control neg	1	3	0
71.5292	207.321	2009.94	726.153	Control neg	1	3	0
63.7366	301.559	2439.92	1064.75	Control neg	1	4	0
66.0567	754.518	3047.74	1491.92	Control neg	1	4	0
74.8316	273.824	2102.3	729.648	Control neg	1	4	0
60.9043	358.007	2559.7	1197.58	Control neg	1	4	0
77.8419	277.86	1888.21	624.442	Control neg	1	4	0
80.9523	276.585	1963.24	586.734	Control neg	1	4	0
73.0371	250.329	1914.65	703.452	Control neg	1	5	0
68.6729	464.429	2672.69	1143.79	Control neg	1	5	0
70.7949	239.576	2085.6	778.267	Control neg	1	5	0
59.9886	269.203	2288.72	1071.78	Control neg	1	5	0
64.4688	722.496	3003.96	1516.06	Control neg	1	5	0
65.1404	417.125	2569.7	1150.26	Control neg	1	5	0
58.9224	362.504	2467.23	1217.27	Control neg	1	5	0
63.4954	579.997	3052.11	1443.37	Control neg	1	5	0
64.0843	251.908	2343.21	990.69	Control neg	1	5	0
67.8138	273.019	2401.32	944.821	Control neg	1	5	0
73.5442	237.814	1944.73	691.91	Control neg	1	5	0
77.812	373.117	2193.11	764.563	Control neg	1	6	0
79.4688	160.496	1094.61	340.185	Control neg	1	6	0
74.056	500.531	2704.18	1056.77	Control neg	2	1	0	58
72.4621	756.758	3179.6	1402.98	Control neg	2	1	0
73.9768	315.119	2350.42	841.289	Control neg	2	1	0
70.4596	173.931	2015.43	727.622	Control neg	2	1	0
77.1055	882.757	4260.88	1650.27	Control neg	2	1	0
75.9946	471.699	2906.07	1037	Control neg	2	1	0
72.9085	473.621	2545.04	1017.08	Control neg	2	1	0
66.0588	479.373	2972.06	1283.01	Control neg	2	1	0
74.4613	390.357	2464.01	903.46	Control neg	2	1	0
73.2027	322.788	2230.14	824.945	Control neg	2	1	0
71.857	729.65	2946.27	1330.19	Control neg	2	1	0
71.7462	384.001	2598.72	984.662	Control neg	2	1	0
75.809	358.72	2116.2	768.91	Control neg	2	1	0
78.0535	379.709	2361.82	791.383	Control neg	2	2	0
77.8672	889.087	3540.72	1470.73	Control neg	2	2	0
75.9309	669.239	2798.63	1163.39	Control neg	2	2	0
77.1843	287.839	1351.17	518.741	Control neg	2	2	0
81.6012	256.118	1454.44	473.405	Control neg	2	2	0
80.2461	257.317	1553.88	478.156	Control neg	2	2	0
75.117	675.507	3164.21	1269.97	Control neg	2	2	0
84.6946	125.905	2150.09	445.684	Control neg	2	2	0
73.4005	479.75	2565.46	1013.63	Control neg	2	2	0
75.3002	388.014	2302.16	843.226	Control neg	2	2	0
81.1661	336.623	2210.17	670.816	Control neg	2	2	0
79.8896	318.067	2048.41	651.46	Control neg	2	2	0
84.8525	100.191	1240.45	273.933	Control neg	2	2	0
76.7251	620.217	2772.03	1093.42	Control neg	2	2	0
80.0695	546.83	3011.37	1021.56	Control neg	2	2	0
78.3347	310.701	2350.65	739.911	Control neg	2	2	0
76.1727	497.389	3029.96	1088.91	Control neg	2	2	0
82.1151	352.769	2780.23	685.646	Control neg	2	2	0
79.5038	590.848	3137.3	1076.03	Control neg	2	2	0
70.5797	541.943	3094.77	1263.64	Control neg	2	4	0
72.7763	566.273	2945.93	1189.05	Control neg	2	4	0
65.3854	782.572	2777.49	1387.97	Control neg	2	4	0
72.4058	524.457	2712.33	1110.43	Control neg	2	4	0
61.4689	1214.16	3134.27	1889.83	Control neg	2	4	0
70.1155	661.024	3011.09	1318.64	Control neg	2	4	0
77.1932	309.312	2439.56	778.454	Control neg	2	4	0
76.6827	286.723	1735.54	612.442	Control neg	2	4	0
78.7341	281.77	1911.94	606.316	Control neg	2	4	0
83.5995	297.534	4378.33	598.015	Control neg	2	4	0
71.2273	580.098	2866.81	1225.89	Control neg	2	4	0
70.0872	467.321	2648.25	1109.4	Control neg	2	4	0
66.5958	587.537	2866.87	1340.4	Control neg	2	4	0
71.925	754.081	3461.83	1476.41	Control neg	2	4	0
70.7357	413.895	2634.09	1052.58	Control neg	2	4	0
73.5211	472.721	2885.52	1098.89	Control neg	2	5	0
72.8434	769.217	3556.32	1478.1	Control neg	2	5	0
75.089	762.536	3234.87	1341.32	Control neg	2	5	0
78.1565	296.718	1603.58	566.222	Control neg	2	5	0
82.2102	294.56	1911.74	558.55	Control neg	2	5	0
74.7566	811.28	3809.85	1532.11	Control neg	2	5	0
70.2824	848.1	3699.42	1641.78	Control neg	2	5	0
67.8477	360.468	2698.08	1089.08	Control neg	2	5	0
72.1614	906.044	3456.29	1569.43	Control neg	2	5	0
71.8626	252.294	1794.61	680.21	Control neg	2	5	0
76.5975	549.835	3143.62	1107.21	Control neg	2	5	0
78.121	393.638	2170.86	764.894	Control neg	3	1	0	38
72.277	418.154	2197.58	892.876	Control neg	3	1	0
75.6421	441.256	2556.23	934.231	Control neg	3	1	0
74.0448	475.714	2327.04	942.455	Control neg	3	1	0
77.2714	373.655	2255.55	785.153	Control neg	3	1	0
75.8284	217.603	1926.09	633.453	Control neg	3	1	0
70.4571	503.333	2427.57	1058.29	Control neg	3	1	0
73.0739	653.603	2826.35	1223.15	Control neg	3	1	0
76.0535	497.443	2462.95	958.388	Control neg	3	2	0
75.1514	730.531	3776.56	1270.54	Control neg	3	2	0
75.5301	405.843	2316.8	849.33	Control neg	3	2	0
77.7188	348.639	2145.14	743.393	Control neg	3	3	0
82.4677	367.302	2098.74	641.252	Control neg	3	3	0
76.2474	637.971	2859.37	1134.24	Control neg	3	3	0
75.3203	656.864	2934.63	1194.83	Control neg	3	3	0
76.4369	434.269	2216.16	844.658	Control neg	3	4	0
76.5973	438.852	2293.94	865.719	Control neg	3	4	0
73.8488	569.131	2719.8	1110.62	Control neg	3	4	0
75.0131	402.573	2289.93	853.084	Control neg	3	4	0
76.2036	513.377	2302.52	916.699	Control neg	3	4	0
78.2978	357.594	2072.26	722.513	Control neg	3	4	0
65.3154	460.147	2406.21	1107.47	Control neg	3	4	0
75.1143	175.688	1690.76	552.724	Control neg	3	4	0
73.5451	534.465	2558.91	1052.54	Control neg	3	4	0
77.1596	407.328	2281.57	816.762	Control neg	3	5	0
72.9166	523.774	2761.26	1095.79	Control neg	3	5	0
80.1732	375.761	2065.56	685.255	Control neg	3	5	0
74.184	422.091	2372.21	913.054	Control neg	3	5	0
78.6727	408.204	2319.26	799.161	Control neg	3	5	0
72.0015	501.311	2555.72	1062.81	Control neg	3	5	0
76.9834	582.522	2821.46	1061.38	Control neg	3	5	0
72.9962	587.089	2739.25	1144.95	Control neg	3	5	0
78.8773	394.22	2239.46	753.324	Control neg	3	5	0
78.7498	405.531	2567.75	704.159	Control neg	3	5	0
76.4249	564.716	2675.57	1061.07	Control neg	3	5	0
75.7899	607.353	2633.18	1081.39	Control neg	3	5	0
77.0795	400.206	2283.21	823.348	Control neg	3	5	0
77.4699	789.032	3061.73	1292.72	Control neg	3	5	0
78.1271	263.922	1997.25	639.974	Control pos	1	1	1	40
76.7237	234.021	1771.21	588.023	Control pos	1	1	1
61.4967	287.649	2487	1112.89	Control pos	1	1	1
62.4828	228.101	2039.85	906.262	Control pos	1	1	1
83.582	109.116	1355.9	323.993	Control pos	1	1	1
93.667	27.5637	2031.06	157.906	Control pos	1	1	1
92.9102	31.7081	2010.48	175.469	Control pos	1	1	1
71.1047	304.878	2258.32	859.387	Control pos	1	1	1
75.1375	270.004	1821.4	665.066	Control pos	1	1	1
90.6319	57.6544	2150.55	260.536	Control pos	1	1	1
91.7553	76.5203	2142.09	252.421	Control pos	1	1	1
63.6898	415.179	2518.6	1162.93	Control pos	1	1	1
92.9114	104.263	1970.17	258.39	Control pos	1	1	1
93.4583	40.1629	2218.92	182.328	Control pos	1	1	1
92.0945	55.0102	1946.82	205.634	Control pos	1	1	1
93.8702	33.7936	2073.61	164.838	Control pos	1	1	1
56.2659	228.357	2270.71	1119.96	Control pos	1	1	1
91.8324	36.8206	1829.58	203.956	Control pos	1	1	1
76.8644	250.416	1723.34	589.977	Control pos	1	1	1
85.2099	72.6712	1008.6	214.378	Control pos	1	2	1
69.4925	299.145	2226.51	883.188	Control pos	1	2	1
71.7869	300.648	2077.96	788.228	Control pos	1	2	1
79.5491	93.5617	1688.26	424.547	Control pos	1	2	1
75.6344	236.041	1733.61	600.693	Control pos	1	2	1
73.2283	245.022	1973.68	704.783	Control pos	1	3	1
75.3223	211.134	2007.85	656.186	Control pos	1	3	1
69.465	193.3	2314.5	839.947	Control pos	1	3	1
69.2433	417.623	2010.07	724.731	Control pos	1	3	1
75.3745	237.749	1996.96	674.296	Control pos	1	5	1
68.3207	303.566	2216.34	906.534	Control pos	1	5	1
66.6235	161.034	2141.48	821.801	Control pos	1	5	1
78.2251	289.976	2240.85	704.612	Control pos	1	5	1
71.6919	449.37	3053.38	856.393	Control pos	1	5	1
78.2726	306.083	2160.05	706.471	Control pos	1	5	1
62.9037	341.589	2591.91	1135.65	Control pos	1	5	1
68.1102	310.945	2513.69	971.061	Control pos	1	5	1
60.386	467.123	2755.65	1326.64	Control pos	1	5	1
62.5007	256.836	2280.86	1017.09	Control pos	1	5	1
63.4429	368.04	1930.9	917.87	Control pos	1	6	1
74.7828	388.643	2625.75	932.421	Control pos	1	6	1
71.7806	603.544	2650.85	1165.36	Control pos	2	1	1	24
75.9575	861.372	2812.76	1318.15	Control pos	2	1	1
76.0474	528.016	2581.76	986.991	Control pos	2	1	1
72.3283	543.245	3013.26	1163.72	Control pos	2	1	1
74.6899	577.903	3270.49	1230.81	Control pos	2	1	1
76.9883	284.854	1776.33	608.307	Control pos	2	2	1
79.538	308.744	1855.33	599.481	Control pos	2	2	1
68.2692	734.015	2859.11	1348.02	Control pos	2	2	1
77.3194	73.95	2311.6	581.449	Control pos	2	2	1
62.9986	113.116	2289.43	917.281	Control pos	2	2	1
75.2969	74.9453	2138.19	584.599	Control pos	2	2	1
83.6746	300.994	1856.28	507.907	Control pos	2	2	1
75.7747	344.724	2193.98	785.116	Control pos	2	3	1
74.2167	309.238	2128.88	768.35	Control pos	2	3	1
77.228	356.43	2019.06	717.077	Control pos	2	3	1
73.8537	375.205	2327.95	863.586	Control pos	2	3	1
73.593	346.637	2210.33	826.257	Control pos	2	3	1
75.2548	419.644	2689.11	971.891	Control pos	2	3	1
66.0412	518.852	2900.31	1299.69	Control pos	2	3	1
72.2386	364.465	2378.11	927.189	Control pos	2	3	1
74.7553	454.432	2465.51	941.077	Control pos	2	3	1
69.3551	999.975	4453.43	1915.52	Control pos	2	4	1
74.3587	797.608	3216.92	1394.24	Control pos	2	4	1
73.2723	456.048	2940.4	1095.17	Control pos	2	4	1
80.6919	234.687	1987.78	575.933	Control pos	3	1	1	11
78.6881	212.815	1706.7	526.218	Control pos	3	1	1
79.1768	410.162	2278.19	742.689	Control pos	3	2	1
76.6545	487.505	2402.24	924.807	Control pos	3	2	1
75.8162	410.405	2239.12	836.893	Control pos	3	2	1
73.8672	525.022	2467.32	1012.25	Control pos	3	2	1
74.4134	220	1914.15	654.448	Control pos	3	3	1
72.9075	166.405	1851.1	623.819	Control pos	3	4	1
74.3458	187.703	1962.73	643.369	Control pos	3	4	1
74.9365	331.943	1739.04	674.011	Control pos	3	5	1
73.4864	509.464	2469.44	1009.68	Control pos	3	5	1
78.0443	462.331	2588.87	744.674	Infected neg	1	1	0	154
78.1119	423.903	2267.21	793.95	Infected neg	1	1	0
73.5608	182.722	1568.87	547.346	Infected neg	1	1	0
70.8127	260.892	2139.03	806.781	Infected neg	1	1	0
68.4081	221.056	1876.72	744.017	Infected neg	1	1	0
69.021	397.232	2530.13	1043.91	Infected neg	1	1	0
74.6596	206.06	1833.35	617.124	Infected neg	1	1	0
84.2392	111.608	1838.7	386.895	Infected neg	1	1	0
78.5274	208.953	1977.71	601.274	Infected neg	1	1	0
95.2694	23.5073	1963.38	112.061	Infected neg	1	1	0
78.7723	254.589	2030.8	620.728	Infected neg	1	1	0
77.3141	265.79	1945.11	642.435	Infected neg	1	1	0
79.9972	292.094	1955.94	562.675	Infected neg	1	1	0
58.1169	156.819	2364.21	1068.52	Infected neg	1	1	0
71.8839	317.399	2372.28	892.011	Infected neg	1	1	0
69.1842	208.483	2948.15	1038.28	Infected neg	1	1	0
71.742	260.411	2265.35	819.856	Infected neg	1	1	0
45.1399	334.097	2180.33	1327.67	Infected neg	1	1	0
71.7353	266.602	2514.01	918.098	Infected neg	1	1	0
61.8132	214.729	2231.48	986.937	Infected neg	1	1	0
69.3741	291.708	1707.49	623.385	Infected neg	1	1	0
69.6169	332.679	3043.16	1058.71	Infected neg	1	1	0
57.0794	290.357	2091.44	1060.51	Infected neg	1	1	0
65.0711	209.801	1903.3	802.304	Infected neg	1	1	0
69.9299	253.421	2217.18	848.93	Infected neg	1	1	0
68.3373	276.779	2323.98	934.472	Infected neg	1	1	0
78.8742	253.165	1965.96	609.137	Infected neg	1	2	0
80.8645	279.518	1882.99	576.35	Infected neg	1	2	0
78.5315	268.108	2043.1	645.306	Infected neg	1	2	0
75.121	232.802	2251.64	728.515	Infected neg	1	2	0
72.7999	217.209	2127.65	729.576	Infected neg	1	2	0
79.6926	165.992	2007.23	543.193	Infected neg	1	2	0
72.0115	149.22	1595.09	553.366	Infected neg	1	2	0
70.128	240.318	2073.23	792.152	Infected neg	1	2	0
65.4317	352.063	2608.57	1113.06	Infected neg	1	2	0
72.816	238.326	1983.21	712.096	Infected neg	1	2	0
72.4338	242.484	2032.57	726.592	Infected neg	1	2	0
71.9189	218.306	2613.09	881.584	Infected neg	1	2	0
77.2875	399.3	3419.09	778.261	Infected neg	1	2	0
63.4315	340.004	2871.63	1258.84	Infected neg	1	2	0
78.5096	281.121	1885.09	604.321	Infected neg	1	2	0
79.7561	288.723	2223.94	674.087	Infected neg	1	2	0
74.8565	260.675	1987.27	689.97	Infected neg	1	2	0
71.4556	274.352	2238.96	826.687	Infected neg	1	2	0
77.6298	244.277	2215.19	682.47	Infected neg	1	2	0
73.7518	198.929	1782.38	614.197	Infected neg	1	2	0
81.9982	311.455	1857.96	586.102	Infected neg	1	2	0
75.3528	269.128	2095.34	714.094	Infected neg	1	2	0
71.5431	298.837	1717.13	692.45	Infected neg	1	2	0
71.8713	268.84	2569.06	910.102	Infected neg	1	2	0
68.8776	254.062	2255.98	873.58	Infected neg	1	2	0
73.1252	235.947	2538.61	847.346	Infected neg	1	2	0
73.7605	221.895	1821.53	635.526	Infected neg	1	2	0
74.9075	227.177	1907.2	644.228	Infected neg	1	2	0
72.382	245.277	2013.97	733.593	Infected neg	1	2	0
74.4419	247.621	1977.42	686.593	Infected neg	1	2	0
77.9083	166.244	1443.02	447.778	Infected neg	1	2	0
92.8109	29.3261	1504.65	132.882	Infected neg	1	2	0
89.701	63.6228	1870.22	246.771	Infected neg	1	2	0
73.296	220.514	2060.12	689.198	Infected neg	1	2	0
75.0962	450.031	2684.56	810.606	Infected neg	1	2	0
74.8418	217.757	1771.72	608.711	Infected neg	1	3	0
77.5448	221.323	1910.8	595.848	Infected neg	1	3	0
73.1122	204.93	2079.72	704.376	Infected neg	1	3	0
70.3741	152.163	2109.54	733.017	Infected neg	1	3	0
76.3864	181.235	1706.96	540.185	Infected neg	1	3	0
70.7731	165.302	1635.17	590.157	Infected neg	1	3	0
74.0881	181.196	1816.93	607.222	Infected neg	1	3	0
72.311	251.086	2117.85	766.131	Infected neg	1	3	0
75.0448	212.922	2005.4	657.201	Infected neg	1	3	0
67.2216	257.327	2087.32	855.268	Infected neg	1	3	0
66.7777	280.152	2320.39	927.263	Infected neg	1	3	0
73.3163	227.577	2007.31	706.688	Infected neg	1	3	0
70.1499	221.571	1988.85	744.708	Infected neg	1	3	0
79.5919	208.974	1483.68	469.488	Infected neg	1	3	0
75.8655	272.659	2088.86	699.17	Infected neg	1	3	0
77.7847	259.016	1576.76	550.491	Infected neg	1	3	0
77.947	256.486	1706.98	575.141	Infected neg	1	3	0
76.0412	275.037	1849.93	648.154	Infected neg	1	3	0
75.0937	251.404	1975.76	665.192	Infected neg	1	3	0
67.0025	248.577	2128.89	862.307	Infected neg	1	3	0
66.8279	300.47	2228.87	932.449	Infected neg	1	3	0
75.438	215.507	2021.52	657.157	Infected neg	1	3	0
74.1357	211.651	2014.68	673.345	Infected neg	1	3	0
73.7853	201.856	1789.03	613.102	Infected neg	1	3	0
73.6325	215.613	2303.59	760.638	Infected neg	1	3	0
76.3165	246.368	1976.41	651.794	Infected neg	1	3	0
71.178	194.104	2086.84	737.298	Infected neg	1	3	0
80.1086	289.067	2172.53	661.35	Infected neg	1	3	0
78.2455	263.991	1487.19	524.387	Infected neg	1	4	0
76.275	190.179	1417.49	479.139	Infected neg	1	4	0
76.583	207.252	1754.69	561.698	Infected neg	1	4	0
80.7339	218.912	1598.7	481.041	Infected neg	1	4	0
75.218	140.523	1417.51	455.987	Infected neg	1	4	0
78.7514	171.091	1780.9	511.562	Infected neg	1	4	0
78.0888	220.161	1992.63	604.688	Infected neg	1	4	0
77.7326	235.306	1640.98	546.931	Infected neg	1	4	0
76.7892	175.647	1955.57	586.351	Infected neg	1	4	0
76.5078	204.701	1825.57	582.84	Infected neg	1	4	0
77.4279	255.452	1848.5	613.203	Infected neg	1	4	0
73.2912	234.193	2002.31	702.865	Infected neg	1	4	0
82.5091	267.539	1564.69	491.711	Infected neg	1	4	0
77.9561	268.702	1836.05	613.062	Infected neg	1	4	0
72.5431	218.407	1750.02	637.567	Infected neg	1	4	0
72.6483	173.221	1995.23	670.499	Infected neg	1	4	0
70.5479	208.767	1655.35	631.239	Infected neg	1	4	0
64.7072	217.069	2578.24	1050.22	Infected neg	1	4	0
77.1417	155.499	1692.09	506.076	Infected neg	1	4	0
76.5305	174.317	1691.59	531.393	Infected neg	1	4	0
77.6091	172.4	1510.4	469.614	Infected neg	1	4	0
76.5177	267.404	1776.28	622.73	Infected neg	1	4	0
82.983	93.2834	1825.29	385.516	Infected neg	1	4	0
75.2544	293.802	2356.02	806.537	Infected neg	1	4	0
78.9505	141.761	1840.53	499.252	Infected neg	1	4	0
74.9887	231.739	1541.22	558.02	Infected neg	1	4	0
77.9982	155.286	1378.5	421.28	Infected neg	1	4	0
80.3403	139.033	1274.25	366.365	Infected neg	1	4	0
70.9521	205.329	1596.84	608.818	Infected neg	1	4	0
76.1242	102.083	1733.7	490.928	Infected neg	1	4	0
75.3716	134.431	1685.93	515.49	Infected neg	1	4	0
76.3457	228.049	1665.45	567.534	Infected neg	1	4	0
75.1126	281.929	2234.04	762.05	Infected neg	1	4	0
75.6453	196.219	1775.02	577.987	Infected neg	1	4	0
78.3352	299.29	1874.59	630.227	Infected neg	1	4	0
75.9396	224.505	1688.02	574.545	Infected neg	1	4	0
71.8179	244.133	2111.84	771.256	Infected neg	1	4	0
81.5922	289.173	1744.49	555.08	Infected neg	1	4	0
77.5235	227.004	1519.97	517.056	Infected neg	1	4	0
79.0568	270.205	2022.54	638.628	Infected neg	1	4	0
66.5456	83.3676	2713.2	955.521	Infected neg	1	5	0
75.0052	160.714	1932.42	603.803	Infected neg	1	5	0
74.987	169.524	1764.09	570.631	Infected neg	1	5	0
72.2989	123.711	1883.48	611.465	Infected neg	1	5	0
74.9812	153.548	2191.05	660.822	Infected neg	1	5	0
69.5129	337.27	2876.4	1091.69	Infected neg	1	5	0
82.6236	320.047	2220.51	656.43	Infected neg	1	5	0
73.0122	200.378	2234.38	751.933	Infected neg	1	5	0
76.7985	139.761	1617.78	482.826	Infected neg	1	5	0
73.9585	244.056	2496.6	827.441	Infected neg	1	5	0
67.6526	235.934	2559.68	981.783	Infected neg	1	5	0
74.213	184.143	2063.65	667.763	Infected neg	1	5	0
72.4784	180.525	2313.86	764.656	Infected neg	1	5	0
73.8277	215.676	2113.01	703.536	Infected neg	1	5	0
78.1147	228.442	1994.71	607.298	Infected neg	1	5	0
79.6542	216.634	1969.59	570.37	Infected neg	1	5	0
61.6936	472.584	2864.11	1379.47	Infected neg	1	5	0
96.651	23.6134	1793.63	82.5081	Infected neg	1	5	0
72.3248	252.656	2228.65	794.451	Infected neg	1	5	0
77.0552	211.243	1736.61	562.503	Infected neg	1	5	0
71.9001	252.129	2350.05	832.859	Infected neg	1	5	0
69.9201	181.985	1953.91	713.232	Infected neg	1	5	0
62.4843	181.012	2321.8	979.334	Infected neg	1	5	0
64.0378	138.561	2200.27	881.55	Infected neg	1	5	0
74.7429	317.069	2256.54	797.334	Infected neg	1	5	0
73.3084	280.535	2152.52	765.328	Infected neg	2	1	0	69
74.2867	274.984	1963.2	701.589	Infected neg	2	1	0
73.0819	327.681	2175.6	822.981	Infected neg	2	1	0
80.0762	177.608	1749.77	486.958	Infected neg	2	1	0
79.4289	292.128	1676.74	553.62	Infected neg	2	1	0
81.2968	245.275	1603.15	484.899	Infected neg	2	1	0
75.4902	420.915	2319.77	875.587	Infected neg	2	1	0
59.5092	608.474	2901.02	1540.38	Infected neg	2	1	0
70.56	386.054	2060.88	852.696	Infected neg	2	1	0
80.1066	310.951	2265.1	676.719	Infected neg	2	1	0
77.8628	244.414	1604.87	532.832	Infected neg	2	1	0
78.1197	240.51	1600.37	536.184	Infected neg	2	1	0
84.2699	197.23	1692.95	417.799	Infected neg	2	1	0
85.7626	147.544	2272.11	443.741	Infected neg	2	1	0
82.519	122.371	1577.36	380.419	Infected neg	2	1	0
75.5169	207.013	1670.79	546.537	Infected neg	2	1	0
79.4379	203.762	1988.98	560.492	Infected neg	2	1	0
77.5526	242.874	1987.43	620.131	Infected neg	2	2	0
74.1522	338.559	2035.87	753.56	Infected neg	2	2	0
78.4491	169.505	1061.83	343.207	Infected neg	2	2	0
78.3047	184.517	1381.19	435.844	Infected neg	2	2	0
80.6937	154.894	1416.54	393.074	Infected neg	2	2	0
80.441	194.271	1377.88	422.683	Infected neg	2	2	0
74.8218	326.14	1958.01	725.677	Infected neg	2	2	0
83.7757	122.025	1270.99	296.853	Infected neg	2	2	0
80.2704	267.709	2132.86	621.387	Infected neg	2	2	0
69.9034	240.552	1534.16	626.948	Infected neg	2	2	0
74.3826	827.203	2812.87	1312.68	Infected neg	2	2	0
77.6604	244.217	1814.76	586.893	Infected neg	2	2	0
75.6056	263.637	1827.69	640.547	Infected neg	2	2	0
78.065	380.439	2019.26	726.472	Infected neg	2	3	0
79.1533	369.496	2268.35	737.171	Infected neg	2	3	0
79.1632	332.056	2380.96	713.71	Infected neg	2	3	0
79.6709	229.06	1742.32	523.171	Infected neg	2	3	0
77.5667	417.099	2550.87	867.916	Infected neg	2	3	0
80.0011	374.679	2866.23	706.74	Infected neg	2	4	0
80.378	371.445	2385.28	735.86	Infected neg	2	4	0
77.6444	337.679	1929.27	679.192	Infected neg	2	4	0
81.2081	186.742	1474.96	426.865	Infected neg	2	4	0
81.6479	466.06	2982.93	943.435	Infected neg	2	4	0
75.8454	269.068	1707.22	607.39	Infected neg	2	4	0
72.2157	286.03	2258.33	826.642	Infected neg	2	4	0
79.6782	273.553	1945.16	593.741	Infected neg	2	4	0
74.3483	287.574	2008.04	712.442	Infected neg	2	4	0
73.594	281.785	2050.54	731.349	Infected neg	2	4	0
77.5127	257.49	1935.05	622.225	Infected neg	2	4	0
75.4225	217.524	1881.62	612.178	Infected neg	2	4	0
78.4038	117.345	1769.59	471.006	Infected neg	2	5	0
80.5134	235.331	2032.42	573.937	Infected neg	2	5	0
79.7767	291.504	1783.73	567.958	Infected neg	2	5	0
82.4835	214.361	2008.5	525.585	Infected neg	2	5	0
75.2825	237.227	2180.61	716.462	Infected neg	2	5	0
82.7169	269.527	1589.39	475.492	Infected neg	2	5	0
76.6813	236.243	1571.47	528.721	Infected neg	2	5	0
78.2754	210.195	1641.51	513.41	Infected neg	2	5	0
74.0035	162.806	1519.55	514.268	Infected neg	2	5	0
75.4501	490.962	2001.29	837.859	Infected neg	2	5	0
78.4159	274.265	1776.65	577.847	Infected neg	2	5	0
82.6298	326.354	1972.48	605.849	Infected neg	2	5	0
79.3193	263.727	1632.05	530.302	Infected neg	2	5	0
78.1816	291.355	1722.39	574.25	Infected neg	2	6	0
76.647	400.818	2116.49	795.408	Infected neg	2	6	0
81.0907	450.049	2447.27	801.704	Infected neg	2	6	0
78.9962	303.127	1528.96	535.155	Infected neg	2	6	0
78.2646	413.31	2298.48	790.784	Infected neg	2	6	0
74.2445	447.646	2897.94	1054.71	Infected neg	2	6	0
69.9862	283.603	2403.32	917.491	Infected neg	2	6	0
75.1798	468.221	2265.87	887.395	Infected neg	2	6	0
74.1147	232.582	1973.22	676.318	Infected neg	2	6	0
77.6003	285.74	1696.07	589.613	Infected neg	3	1	0	35
72.9467	667.236	3193.08	1316.65	Infected neg	3	1	0
77.1781	327.407	2001.57	695.275	Infected neg	3	1	0
78.051	281.299	1822.58	607.099	Infected neg	3	1	0
75.3589	321.099	1972.74	711.942	Infected neg	3	1	0
74.675	406.924	2551.07	934.307	Infected neg	3	1	0
76.64	310.622	1943.39	676.977	Infected neg	3	1	0
77.1399	287.182	1690.27	589.996	Infected neg	3	1	0
77.2825	223.525	1564.04	520.597	Infected neg	3	1	0
76.0336	160.491	1362.05	445.343	Infected neg	3	1	0
75.3426	290.008	1588.04	600.256	Infected neg	3	1	0
79.326	340.231	2035.62	676.808	Infected neg	3	1	0
80.2074	139.892	1703.47	448.867	Infected neg	3	1	0
75.5982	419.536	2127.12	835.545	Infected neg	3	1	0
78.5498	175.29	1925.7	548.738	Infected neg	3	1	0
74.675	297.797	2067.34	734.809	Infected neg	3	2	0
75.4311	496.734	2628.89	1004.1	Infected neg	3	2	0
87.9046	113.559	1607.1	292.227	Infected neg	3	3	0
81.5453	164.43	1806.28	455.112	Infected neg	3	3	0
77.5647	265.617	1637.24	561.865	Infected neg	3	3	0
73.5589	238.114	1835.62	653.684	Infected neg	3	3	0
79.0426	187.809	1524.74	470.616	Infected neg	3	3	0
92.6076	84.6938	1721	213.092	Infected neg	3	3	0
74.8745	467.342	2521.7	966.21	Infected neg	3	3	0
74.0333	368.547	2253.03	844.405	Infected neg	3	4	0
74.5315	531.483	2594.5	1043.52	Infected neg	3	4	0
78.1081	446.687	2320.18	815.648	Infected neg	3	4	0
76.9973	407.754	1867.79	728.493	Infected neg	3	4	0
73.7263	333.252	1988.15	754.324	Infected neg	3	4	0
76.0895	371.669	1949.82	714.604	Infected neg	3	4	0
77.2053	335.931	1947.37	687.966	Infected neg	3	4	0
76.3175	206.689	1967.1	620.799	Infected neg	3	4	0
77.5022	181.364	1280.12	400.468	Infected neg	3	4	0
77.0764	282.133	1753.27	598.648	Infected neg	3	5	0
72.3257	539.342	2602.05	1095.18	Infected neg	3	5	0
77.9055	225.951	1688.62	544.526	Infected pos	1	1	1	309
70.1804	179.259	2050.11	736.258	Infected pos	1	1	1
70.7316	213.038	1935.95	715.985	Infected pos	1	1	1
76.8477	224.448	1867.41	601.049	Infected pos	1	1	1
70.4116	205.44	2004.21	737.535	Infected pos	1	1	1
73.7176	191.195	1832.17	617.924	Infected pos	1	1	1
77.6698	262.84	1914.9	620.397	Infected pos	1	1	1
74.1552	209.031	1540.2	550.953	Infected pos	1	1	1
75.2778	212.98	1756.77	592.34	Infected pos	1	1	1
77.3706	199.416	1821.5	565.274	Infected pos	1	1	1
80.8075	170.465	1828.04	484.179	Infected pos	1	1	1
67.9821	210.498	2006.37	787.469	Infected pos	1	1	1
74.4898	204.313	1878.82	634.353	Infected pos	1	1	1
89.7439	51.5988	1916.13	251.583	Infected pos	1	1	1
72.9431	260.936	1895.05	705.099	Infected pos	1	1	1
78.46	174.216	1727.41	509.766	Infected pos	1	1	1
74.6795	247.441	1883.46	659.174	Infected pos	1	1	1
72.362	148.248	1962.89	655.066	Infected pos	1	1	1
90.4132	265.024	1865.23	426.661	Infected pos	1	1	1
63.9113	434.205	2423.82	768.524	Infected pos	1	1	1
75.6406	235.986	2232.37	714.302	Infected pos	1	1	1
70.1362	251.29	2359.38	882.3	Infected pos	1	1	1
61.5876	272.574	2515.02	1120.34	Infected pos	1	1	1
66.2448	380.856	2727.44	1172.69	Infected pos	1	1	1
54.7821	288.695	2254.95	1175.64	Infected pos	1	1	1
54.7296	285.408	2469.71	1269.43	Infected pos	1	1	1
60.014	250.776	2316.41	1069.75	Infected pos	1	1	1
67.6508	178.573	2024.3	775.221	Infected pos	1	1	1
74.5401	249.806	1967.47	681.96	Infected pos	1	1	1
68.3557	253.822	2272.19	897.351	Infected pos	1	1	1
73.7982	298.11	2148.89	780.909	Infected pos	1	1	1
69.9336	327.417	2510.18	964.857	Infected pos	1	1	1
69.1236	257.582	2067.95	809.222	Infected pos	1	1	1
75.0143	263.963	1955.31	684.068	Infected pos	1	1	1
74.2409	252.722	1833.44	656.249	Infected pos	1	1	1
55.8278	328.443	2121.72	1112.12	Infected pos	1	1	1
77.3893	244.61	1806.95	596.458	Infected pos	1	2	1
80.0194	154.624	1500.73	420.855	Infected pos	1	2	1
76.928	132.869	1852.36	528.521	Infected pos	1	2	1
72.0406	156.398	1725.12	593.866	Infected pos	1	2	1
73.8667	186.987	1915.81	637.553	Infected pos	1	2	1
59.6654	229.096	2613.46	1190.57	Infected pos	1	2	1
59.6024	250.274	2728.16	1254.49	Infected pos	1	2	1
68.833	198.333	2013.83	769.895	Infected pos	1	2	1
78.0174	251.71	2060.43	643.06	Infected pos	1	2	1
73.3254	272.635	2378.26	834.102	Infected pos	1	2	1
74.1107	184.315	1832.2	607.535	Infected pos	1	2	1
70.217	182.948	2372.57	839.122	Infected pos	1	2	1
75.3781	203.005	1777.53	589.774	Infected pos	1	2	1
79.2174	106.927	1709.83	439.651	Infected pos	1	2	1
77.213	184.019	1726.6	534.821	Infected pos	1	2	1
73.2246	210.208	1969.84	686.281	Infected pos	1	2	1
73.6269	165.555	1774.41	588.709	Infected pos	1	2	1
79.9259	102.482	1432.66	372.311	Infected pos	1	2	1
83.5862	95.0793	1164.21	274.895	Infected pos	1	2	1
74.4885	162.537	1837.55	588.675	Infected pos	1	2	1
75.7298	199.906	1534.95	523.63	Infected pos	1	2	1
75.0352	260.364	2066.75	712.295	Infected pos	1	2	1
73.2016	224.964	1951.07	685.93	Infected pos	1	2	1
71.124	239.61	2038.93	759.639	Infected pos	1	2	1
71.6115	254.647	2053.3	765.513	Infected pos	1	2	1
74.3798	243.109	1922.43	671.063	Infected pos	1	2	1
73.5543	241.473	1893.75	678.232	Infected pos	1	2	1
74.1131	192.732	1807.84	611.074	Infected pos	1	2	1
74.511	229.659	1950.27	667.147	Infected pos	1	2	1
68.2808	165.989	1986.34	746.609	Infected pos	1	2	1
75.6553	136.325	1624.59	504.328	Infected pos	1	2	1
75.7993	183.077	1790.36	570.891	Infected pos	1	2	1
69.4851	143.844	2097.1	739.428	Infected pos	1	2	1
75.5488	170.389	1790.76	565.838	Infected pos	1	2	1
74.5442	173.883	1715.44	565.377	Infected pos	1	2	1
90.1668	46.2255	1798.93	217.947	Infected pos	1	2	1
75.6125	173.641	1651.1	533.234	Infected pos	1	2	1
74.8654	226.506	1619.23	574.875	Infected pos	1	2	1
72.1258	231.498	1911.37	698.983	Infected pos	1	2	1
77.6706	189.877	1952.09	584.971	Infected pos	1	2	1
78.421	151.962	1843.97	516.865	Infected pos	1	2	1
74.5871	144.982	1674.11	533.435	Infected pos	1	2	1
77.2894	215.166	1701.98	547.706	Infected pos	1	3	1
79.2218	181.193	1686.65	492.999	Infected pos	1	3	1
76.6414	203.592	1888.53	594.913	Infected pos	1	3	1
76.3044	156.156	1729.57	527.898	Infected pos	1	3	1
76.3444	218.808	1730.47	574.537	Infected pos	1	3	1
73.7271	126.438	1856.65	580.439	Infected pos	1	3	1
74.6911	159.585	1656.02	537.515	Infected pos	1	3	1
78.9734	141.377	1458.76	416.889	Infected pos	1	3	1
76.9514	163.976	1602.3	494.653	Infected pos	1	3	1
75.9561	232.374	1777.18	602.361	Infected pos	1	3	1
76.2983	158.984	1631.16	507.392	Infected pos	1	3	1
76.7228	180.469	1943.27	589.993	Infected pos	1	3	1
75.7883	179.469	1706.08	548.656	Infected pos	1	3	1
76.1726	175.716	1765.46	553.693	Infected pos	1	3	1
72.0119	202.188	1912.63	681.936	Infected pos	1	3	1
73.5689	178.252	1668.29	571.907	Infected pos	1	3	1
77.3834	199.716	1739.82	546.896	Infected pos	1	3	1
72.3893	188.987	1776.99	630.494	Infected pos	1	3	1
75.7387	198.671	1933.96	621.538	Infected pos	1	3	1
75.2265	152.856	1697.68	534.162	Infected pos	1	3	1
73.0511	167.248	1774.95	598.422	Infected pos	1	3	1
76.0708	142.402	1676.08	509.351	Infected pos	1	3	1
69.6498	146.241	1975.38	702.122	Infected pos	1	3	1
73.2253	172.346	1765.8	599.696	Infected pos	1	3	1
76.784	186.594	1728.9	545.095	Infected pos	1	3	1
69.9852	192.693	1930.08	713.732	Infected pos	1	3	1
66.645	165.858	2009.4	779.406	Infected pos	1	3	1
74.6205	270.302	2019.07	713.676	Infected pos	1	3	1
73.4107	188.304	1910.07	642.997	Infected pos	1	3	1
74.8923	168.501	1715.29	555.251	Infected pos	1	3	1
73.4856	155.711	1837.31	601.625	Infected pos	1	3	1
71.7454	168.295	1797.05	630.963	Infected pos	1	3	1
69.4998	181.309	2242.41	808.82	Infected pos	1	3	1
75.0449	156.14	1783.01	562.742	Infected pos	1	3	1
74.3547	158.703	1601.77	525.139	Infected pos	1	3	1
74.8774	171.755	1701.14	554.593	Infected pos	1	3	1
77.1806	147.435	1796.27	522.63	Infected pos	1	3	1
69.011	154.16	1728.16	642.159	Infected pos	1	3	1
74.2369	242.956	2089.72	719.623	Infected pos	1	3	1
70.4865	208.372	2080.91	760.397	Infected pos	1	3	1
76.0733	208.107	1733.79	574.579	Infected pos	1	3	1
72.6359	132.233	1834.31	597.958	Infected pos	1	3	1
74.2498	241.906	1883.06	659.043	Infected pos	1	3	1
74.5317	200.298	1681.62	575.694	Infected pos	1	3	1
73.5557	151.852	1667.36	552.644	Infected pos	1	3	1
75.2583	245.211	2008.43	675.743	Infected pos	1	3	1
75.7257	180.829	1770.52	567	Infected pos	1	3	1
74.6979	192.32	1731.59	577.026	Infected pos	1	3	1
75.3348	204.537	1804.64	599.59	Infected pos	1	3	1
74.615	194.313	1669.15	563.671	Infected pos	1	3	1
72.145	175.507	1942.03	665.338	Infected pos	1	3	1
75.3591	196.193	1766	581.436	Infected pos	1	3	1
71.7509	134.943	1944.02	645.808	Infected pos	1	3	1
77.1253	147.49	1800.62	525.936	Infected pos	1	3	1
76.8961	179.683	1657.46	517.71	Infected pos	1	4	1
87.9744	74.883	1301.8	232.809	Infected pos	1	4	1
75.0845	171.853	1806.09	576.351	Infected pos	1	4	1
74.8484	125.822	1180.73	390.97	Infected pos	1	4	1
82.2611	145.049	1369.75	362.49	Infected pos	1	4	1
80.3844	222.855	1676.2	501.845	Infected pos	1	4	1
78.666	182.36	1535.9	466.831	Infected pos	1	4	1
78.2894	207.442	1647.14	517.576	Infected pos	1	4	1
91.522	41.2348	1850.64	193.675	Infected pos	1	4	1
77.9751	174.748	1934.94	555.679	Infected pos	1	4	1
77.906	153.108	1758.47	507.611	Infected pos	1	4	1
77.9967	232.355	1558.11	519.33	Infected pos	1	4	1
78.8974	164.045	1475.96	440.84	Infected pos	1	4	1
74.3627	170.403	1731.29	570.193	Infected pos	1	4	1
77.4217	245.668	1410.88	497.552	Infected pos	1	4	1
82.4957	182.016	1590.26	432.322	Infected pos	1	4	1
76.9567	231.921	1600.19	542.844	Infected pos	1	4	1
77.8131	194.732	1502.48	482.805	Infected pos	1	4	1
76.6645	237.812	1285.61	475.154	Infected pos	1	4	1
77.4385	185.694	1572.83	496.919	Infected pos	1	4	1
78.0212	164.114	1626.28	485.011	Infected pos	1	4	1
78.6312	219.009	1658.83	521.154	Infected pos	1	4	1
79.1804	244.921	2090.78	626.748	Infected pos	1	4	1
81.7611	180.458	1634.25	447.213	Infected pos	1	4	1
75.2514	210.106	1610.52	554.704	Infected pos	1	4	1
76.8267	145.486	1481.84	455.759	Infected pos	1	4	1
74.1739	120.344	1658.84	517.578	Infected pos	1	4	1
73.707	155.619	1760.02	576.161	Infected pos	1	4	1
75.7168	205.255	1717.9	570.552	Infected pos	1	4	1
76.6603	107.121	1521.63	436.456	Infected pos	1	4	1
77.3756	158.109	1842.22	538.157	Infected pos	1	4	1
75.7261	227.957	1676.36	578.42	Infected pos	1	4	1
74.9474	124.731	1432.02	451.735	Infected pos	1	4	1
80.2599	151.95	1250.16	360.509	Infected pos	1	4	1
80.0291	188.164	1662.07	482.529	Infected pos	1	4	1
77.0272	154.842	1759.69	523.6	Infected pos	1	4	1
72.1281	218.997	1850.95	667.393	Infected pos	1	4	1
75.5716	192.096	1834.54	592.249	Infected pos	1	4	1
76.3703	212.31	1516.1	519.16	Infected pos	1	4	1
80.3741	146.144	1801.64	469.153	Infected pos	1	4	1
76.2369	176.907	1699.16	537.02	Infected pos	1	4	1
77.2031	201.047	1532.06	503.931	Infected pos	1	4	1
77.3277	141.028	1545.54	459.965	Infected pos	1	4	1
74.7027	183.066	1582.23	536.422	Infected pos	1	4	1
76.2954	173.589	1690.83	531.92	Infected pos	1	4	1
70.4651	201.196	1928.29	711.626	Infected pos	1	4	1
75.3475	195.497	1838.37	598.655	Infected pos	1	4	1
76.4007	170.652	1612.11	510.043	Infected pos	1	4	1
69.8773	185.369	1884.54	697.443	Infected pos	1	4	1
76.2155	186.574	1630.18	529.071	Infected pos	1	4	1
77.7526	158.57	1540.76	465.638	Infected pos	1	4	1
78.1791	150.82	1503.16	444.955	Infected pos	1	4	1
74.6321	186.231	1806.84	595.262	Infected pos	1	4	1
73.8528	158.231	1721.88	567.277	Infected pos	1	4	1
72.8875	172.801	1533.74	541.39	Infected pos	1	4	1
76.0237	145.513	1515.84	472.784	Infected pos	1	4	1
76.4287	136.251	1669.4	497.789	Infected pos	1	4	1
76.3588	192.663	1872.31	588.049	Infected pos	1	4	1
78.0622	185.955	1654.26	507.141	Infected pos	1	4	1
77.6585	219.942	2019.03	621.247	Infected pos	1	4	1
76.3352	226.659	1874.12	615.595	Infected pos	1	4	1
76.1013	190.453	1694.86	547.383	Infected pos	1	4	1
78.0166	201.296	1537.61	493.289	Infected pos	1	4	1
78.1327	213.481	1433.77	476.998	Infected pos	1	4	1
74.434	192.869	1846.25	613.327	Infected pos	1	4	1
80.1824	161.579	1757.39	466.307	Infected pos	1	4	1
79.7096	229.288	1829.15	548.543	Infected pos	1	4	1
76.6053	208.629	1853.25	590.453	Infected pos	1	4	1
78.9329	212.41	1732.61	530.948	Infected pos	1	4	1
77.2939	198.758	1570.71	508.058	Infected pos	1	4	1
75.983	244.592	1991.72	663.315	Infected pos	1	4	1
71.2	194.193	1881.11	678.267	Infected pos	1	4	1
78.5193	201.021	1666.6	513.779	Infected pos	1	4	1
78.0377	187.854	1648.09	506.882	Infected pos	1	4	1
81.6481	168.021	1469.09	405.778	Infected pos	1	4	1
75.6596	186.769	1652.52	544.24	Infected pos	1	4	1
78.8685	152.629	1738.85	486.634	Infected pos	1	4	1
78.3369	244.303	1797.95	579.771	Infected pos	1	4	1
89.108	54.2185	1335.86	199.359	Infected pos	1	4	1
79.9243	225.928	1793.66	539.969	Infected pos	1	4	1
73.2198	196.178	1857.32	639.205	Infected pos	1	4	1
79.6671	162.017	1633.99	458.08	Infected pos	1	4	1
77.2188	208.557	1622.1	529.121	Infected pos	1	4	1
78.9271	151.262	1413.38	415.661	Infected pos	1	4	1
78.3931	156.159	1597.79	467.513	Infected pos	1	4	1
77.4951	195.234	1547.6	498.06	Infected pos	1	4	1
76.9382	185.428	1544.94	497.54	Infected pos	1	4	1
75.38	191.409	1750.76	574.624	Infected pos	1	4	1
77.4277	192.755	1501.32	486.655	Infected pos	1	4	1
85.5413	71.1557	1265.45	248.768	Infected pos	1	4	1
78.1736	155.394	1441.53	435.534	Infected pos	1	4	1
77.6217	236.685	1710.45	565.034	Infected pos	1	4	1
77.0018	143.939	1706.82	503.086	Infected pos	1	4	1
78.5785	197.52	1587	491.025	Infected pos	1	4	1
77.4364	130.543	1647.19	471.212	Infected pos	1	4	1
81.9537	145.526	1327.82	359.499	Infected pos	1	4	1
79.3809	182.105	1441.31	434.908	Infected pos	1	4	1
73.538	177.176	1516.38	531.303	Infected pos	1	4	1
76.3509	197.94	1751.86	561.35	Infected pos	1	4	1
78.9011	163.238	1573.86	459.016	Infected pos	1	4	1
71.9567	213.391	1765.27	655.544	Infected pos	1	4	1
72.9486	179.506	1644.89	574.243	Infected pos	1	4	1
72.2794	142.616	1729.13	581.935	Infected pos	1	4	1
79.1482	116.249	1451.47	394.161	Infected pos	1	4	1
73.1272	160.568	1491.68	515.345	Infected pos	1	4	1
80.1845	239.066	1925.29	567.926	Infected pos	1	4	1
76.6129	230.288	1912.64	625.233	Infected pos	1	4	1
76.8653	206.059	1668.07	539.628	Infected pos	1	4	1
75.797	248.946	1990.5	670.23	Infected pos	1	4	1
75.5369	185.486	1759.99	568.952	Infected pos	1	4	1
76.0201	176.487	1818.07	568.474	Infected pos	1	4	1
75.7798	221.925	1723.73	583.859	Infected pos	1	4	1
82.083	124.309	1950.8	457.616	Infected pos	1	5	1
82.991	170.035	1618.77	415.322	Infected pos	1	5	1
82.4956	51.4148	2454.79	490.232	Infected pos	1	5	1
80.543	136.366	1671.59	434.691	Infected pos	1	5	1
83.2906	72.4022	1661.4	359.654	Infected pos	1	5	1
94.3765	27.8856	1973.64	140.821	Infected pos	1	5	1
76.5152	101.252	2020.27	554.799	Infected pos	1	5	1
88.371	66.0435	1955.34	290.271	Infected pos	1	5	1
76.0067	118.464	2162.48	612.502	Infected pos	1	5	1
74.8922	116.9	1957.36	579.535	Infected pos	1	5	1
88.8998	62.7102	1931.73	280.767	Infected pos	1	5	1
87.0893	59.2122	1776.77	294.562	Infected pos	1	5	1
77.5926	114.596	1631.96	455.644	Infected pos	1	5	1
86.9339	58.5138	1572.19	278.049	Infected pos	1	5	1
88.2565	44.0594	1798.78	260.894	Infected pos	1	5	1
84.5814	65.3514	1798.28	335.159	Infected pos	1	5	1
73.6545	360.637	2578.73	942.718	Infected pos	1	5	1
87.3921	72.813	1721.16	306.464	Infected pos	1	5	1
75.256	125.098	2027.8	605.215	Infected pos	1	5	1
75.7224	161.778	1915.07	592.074	Infected pos	1	5	1
89.7172	74.9358	1433.27	244.025	Infected pos	1	5	1
79.6915	98.0985	1704.71	423.966	Infected pos	1	5	1
74.1063	130.353	1963.71	603.818	Infected pos	1	5	1
73.143	140.457	1744.8	570.713	Infected pos	1	5	1
75.4113	108.365	1708.1	503.216	Infected pos	1	5	1
75.1474	145.661	1890.76	579.323	Infected pos	1	5	1
72.4722	145.653	1965.91	646.351	Infected pos	1	5	1
77.8307	119.993	1624.57	450.476	Infected pos	1	5	1
73.8683	172.652	1788.94	595.586	Infected pos	1	5	1
71.3743	163.162	1835	641.379	Infected pos	1	5	1
79.6932	142.827	1477.55	410.972	Infected pos	1	5	1
74.75	139.212	1860.73	573.537	Infected pos	1	5	1
74.1968	95.7211	1698.99	509.02	Infected pos	1	5	1
74.0326	151.086	1730.96	561.699	Infected pos	1	5	1
74.5544	204.107	1182.66	432.522	Infected pos	1	5	1
75.0849	147.136	1904.16	584.616	Infected pos	1	5	1
73.1451	150.064	1800.57	588.222	Infected pos	1	5	1
75.1429	191.452	1748.52	577.95	Infected pos	1	5	1
75.1509	183.09	1850.89	595.512	Infected pos	1	5	1
72.6344	180.63	1755.45	612.219	Infected pos	1	5	1
76.8342	139.894	1590.14	475.068	Infected pos	1	5	1
91.9898	50.4608	1500.78	170.017	Infected pos	1	5	1
79.3731	155.271	1722.82	476.753	Infected pos	1	5	1
76.6623	166.679	1796.23	547.15	Infected pos	1	5	1
76.9923	149.094	1831.77	529.855	Infected pos	1	5	1
82.2204	106.099	1544.93	361.243	Infected pos	1	5	1
96.8833	24.6779	1598.68	82.6115	Infected pos	1	5	1
80.254	135.864	1949.11	494.09	Infected pos	1	5	1
96.6892	20.155	1870.58	80.6976	Infected pos	1	5	1
78.8125	82.8796	2300.5	552.687	Infected pos	1	5	1
82.85	56.162	2240.27	430.427	Infected pos	1	5	1
72.6796	198.261	2072.42	709.186	Infected pos	1	5	1
75.2996	222.5	2186.24	705.404	Infected pos	1	5	1
71.8709	212.769	2019.16	721.09	Infected pos	1	5	1
78.2378	227.742	1936.76	598.519	Infected pos	1	5	1
67.7414	107.392	2126.92	758.944	Infected pos	1	5	1
74.2772	216.26	2018.47	678.97	Infected pos	1	5	1
69.6519	144.834	2111.82	743.988	Infected pos	1	5	1
76.2259	201.708	1883.59	601.005	Infected pos	1	5	1
76.4798	264.637	1887.5	655.631	Infected pos	1	5	1
78.1804	222.294	1552.11	510.132	Infected pos	1	5	1
75.5236	177.454	1664.7	540.856	Infected pos	1	5	1
71.1727	179.607	1971.67	695.859	Infected pos	1	5	1
76.6631	244.765	1616.53	562.816	Infected pos	1	5	1
78.108	205.12	1603.41	507.174	Infected pos	1	5	1
71.2581	394.938	2229.92	910.407	Infected pos	2	1	1	258
71.5237	229.576	1791.27	668.469	Infected pos	2	1	1
71.1659	244.817	1741.55	668.549	Infected pos	2	1	1
72.5892	226.074	1656.39	612.894	Infected pos	2	1	1
84.1691	122.326	1477.38	337.893	Infected pos	2	1	1
82.0068	367.199	2112.7	698.854	Infected pos	2	1	1
79.4363	299.693	1972.22	624.215	Infected pos	2	1	1
75.4025	219.598	1533.37	535.302	Infected pos	2	1	1
76.2392	287.859	1793.01	636.046	Infected pos	2	1	1
75.9183	218.788	1730.93	559.29	Infected pos	2	1	1
78.929	269.175	1896.23	585.253	Infected pos	2	1	1
79.6765	251.191	1700.72	528.824	Infected pos	2	1	1
79.421	244.56	1437.86	481.784	Infected pos	2	1	1
77.9909	199.365	1508.52	484.244	Infected pos	2	1	1
80.4219	311.658	1943.74	634.133	Infected pos	2	1	1
80.5922	293.096	1779.81	565.472	Infected pos	2	1	1
81.2519	393.308	2058.75	713.604	Infected pos	2	1	1
77.7725	162.665	1313.9	408.436	Infected pos	2	1	1
82.2564	197.737	1730.4	462.81	Infected pos	2	1	1
70.4141	712.565	2283.25	1119.27	Infected pos	2	1	1
75.2073	642.465	2459.58	1070.9	Infected pos	2	1	1
67.8249	898.21	2468.92	1342.18	Infected pos	2	1	1
73.8166	886.744	2688.5	1312.04	Infected pos	2	1	1
81.3552	189.368	1557	433.705	Infected pos	2	1	1
75.3047	227.456	1671.29	577.204	Infected pos	2	2	1
75.7303	238.376	1556.52	549.678	Infected pos	2	2	1
76.3226	228.734	1368.86	487.881	Infected pos	2	2	1
70.6042	198.628	1611.77	607.922	Infected pos	2	2	1
79.8456	300.538	1774.22	589.318	Infected pos	2	2	1
75.825	555.753	2261.76	962.572	Infected pos	2	2	1
73.3884	216.717	1481.33	548.297	Infected pos	2	2	1
78.399	205.76	1628.78	501.705	Infected pos	2	2	1
78.7545	293.726	1498.31	536.54	Infected pos	2	2	1
79.0004	316.208	1711.98	595.98	Infected pos	2	2	1
80.5696	170.474	1299.25	383.47	Infected pos	2	2	1
74.5285	261.687	1633.09	587.475	Infected pos	2	2	1
76.2256	307.506	1847.99	661.258	Infected pos	2	2	1
76.5467	163.556	1228.04	409.101	Infected pos	2	2	1
76.36	242.525	1724.06	576.597	Infected pos	2	2	1
77.7063	227.31	1583.21	516.438	Infected pos	2	2	1
81.7859	204.617	1509.72	430.592	Infected pos	2	2	1
79.4181	246.118	1775.65	550.931	Infected pos	2	2	1
79.6738	209.964	1714.02	509.072	Infected pos	2	2	1
75.6117	886.412	2548.96	1253.16	Infected pos	2	2	1
69.1141	525.43	2360.1	1069.34	Infected pos	2	2	1
79.795	206.256	1401.42	438.948	Infected pos	2	2	1
69.461	911.585	2674.27	1382.02	Infected pos	2	2	1
73.995	205.3	1486.72	534.159	Infected pos	2	2	1
79.0364	259.031	1663.13	548.757	Infected pos	2	2	1
79.5822	220.122	1489.98	462.392	Infected pos	2	2	1
76.7599	247.999	1660.36	562.451	Infected pos	2	2	1
77.8837	216.915	1258.94	434.737	Infected pos	2	2	1
78.5661	216.683	1530.7	468.436	Infected pos	2	2	1
73.4476	291.066	2174.74	785.497	Infected pos	2	2	1
78.6856	310.03	2140.84	680.731	Infected pos	2	2	1
79.8299	290.259	1732.62	571.568	Infected pos	2	2	1
77.7155	289.325	1729.42	595.086	Infected pos	2	2	1
80.8125	304.8	1646.14	550.11	Infected pos	2	2	1
79.218	233.533	1676.93	527.275	Infected pos	2	2	1
78.2443	245.548	1741.14	564.465	Infected pos	2	2	1
80.0373	258.488	1526.45	504.69	Infected pos	2	3	1
81.2515	292.468	1857.22	578.011	Infected pos	2	3	1
71.1599	277.232	2185.9	815.093	Infected pos	2	3	1
70.7861	322.868	2307.13	897.799	Infected pos	2	3	1
78.303	279.997	2665.09	772.701	Infected pos	2	3	1
75.1975	252.83	2157.93	725.18	Infected pos	2	3	1
72.0876	367.37	2418.58	931.073	Infected pos	2	3	1
77.3675	193.941	1622.06	511.154	Infected pos	2	3	1
77.5618	332.704	2127.42	727.698	Infected pos	2	3	1
78.9489	255.974	1986.89	604.054	Infected pos	2	3	1
79.2574	279.138	1772	571.979	Infected pos	2	3	1
77.1746	277.102	1760.33	598.391	Infected pos	2	3	1
81.1679	276.532	1895.73	557.481	Infected pos	2	3	1
78.1667	228.876	1867.57	577.35	Infected pos	2	3	1
78.4123	582.997	2537.1	983.215	Infected pos	2	3	1
76.6551	291.367	1987.75	670.159	Infected pos	2	3	1
73.9851	311.206	2259.02	802.089	Infected pos	2	3	1
75.9796	225.373	1596.59	543.984	Infected pos	2	3	1
79.1925	210.168	1687.96	510.674	Infected pos	2	3	1
79.3347	336.971	2013.59	701.075	Infected pos	2	3	1
61.8623	190.116	2315.18	1000.32	Infected pos	2	3	1
77.5648	232.666	1951.11	610.732	Infected pos	2	3	1
79.1702	258.264	1774.97	558.304	Infected pos	2	3	1
77.7042	198.607	1596.45	501.134	Infected pos	2	3	1
81.7988	259.774	2183.02	551.347	Infected pos	2	3	1
75.3773	321.958	2130.09	758.057	Infected pos	2	3	1
73.1783	321.412	2214.54	828.234	Infected pos	2	3	1
82.0682	296.66	2062.39	568.767	Infected pos	2	3	1
77.8698	232.947	1668.21	546.298	Infected pos	2	3	1
60.9571	267.662	2256.59	1041.33	Infected pos	2	3	1
78.6591	264.149	2191.33	613.389	Infected pos	2	3	1
78.3809	262.607	1945.93	588.981	Infected pos	2	3	1
78.6967	185.193	1541.19	465.439	Infected pos	2	3	1
78.4151	214.233	1641.05	503.164	Infected pos	2	3	1
75.6687	425.784	2307.15	857.786	Infected pos	2	4	1
75.764	288.938	2101.18	719.846	Infected pos	2	4	1
75.8659	209.616	1665.53	553.233	Infected pos	2	4	1
76.5675	238.68	1823.3	598.902	Infected pos	2	4	1
79.3202	380.183	2349	763.581	Infected pos	2	4	1
75.9622	234.036	1715.64	580.763	Infected pos	2	4	1
78.741	410.589	2122.85	748.371	Infected pos	2	4	1
73.0012	242.8	1791.89	658.25	Infected pos	2	4	1
76.3814	303.132	2006.72	691.099	Infected pos	2	4	1
73.2329	214.754	1638.82	589.217	Infected pos	2	4	1
74.6424	379.952	1971.98	768.657	Infected pos	2	4	1
74.2312	320.697	2082.13	760.869	Infected pos	2	4	1
73.4732	261.586	2052.02	727.988	Infected pos	2	4	1
85.6157	124.087	1465.34	317.391	Infected pos	2	4	1
77.7807	258.088	1794.19	586.129	Infected pos	2	4	1
75.4854	271.089	1657.59	598.684	Infected pos	2	4	1
77.6563	289.165	1794.82	611.822	Infected pos	2	4	1
74.5883	313.56	1931.87	710.812	Infected pos	2	4	1
75.8248	226.176	1900.08	621.615	Infected pos	2	4	1
81.3818	279.268	2215.9	637.539	Infected pos	2	4	1
74.1643	269.503	1785.14	650.558	Infected pos	2	4	1
76.8681	277.02	1861.38	628.794	Infected pos	2	4	1
76.4179	279.481	1981.67	670.555	Infected pos	2	4	1
75.7874	294.909	2300.97	775.871	Infected pos	2	4	1
75.4809	268.202	1913.47	657.693	Infected pos	2	4	1
74.0609	256.323	1996.74	695.011	Infected pos	2	4	1
71.4917	330.623	2095.67	820.351	Infected pos	2	4	1
78.8616	344.03	2282.18	735.27	Infected pos	2	4	1
76.9962	279.301	1898.22	645.19	Infected pos	2	4	1
78.5827	300.569	1724.59	598.395	Infected pos	2	4	1
73.107	300.184	1996.32	744.202	Infected pos	2	4	1
68.3645	216.758	1790.13	712.721	Infected pos	2	4	1
76.6552	194.937	1666.45	534.162	Infected pos	2	4	1
76.4654	299.897	2012.98	686.053	Infected pos	2	4	1
76.2308	302.112	1871.31	661.66	Infected pos	2	4	1
73.2814	214.091	1971.41	677.626	Infected pos	2	4	1
81.9768	291.186	1570.65	498.43	Infected pos	2	5	1
78.6045	214.178	1344.55	435.739	Infected pos	2	5	1
78.0796	164.786	1469.37	450.133	Infected pos	2	5	1
79.1833	181.731	1432.57	426.191	Infected pos	2	5	1
71.6576	201.033	1993.17	700.686	Infected pos	2	5	1
79.3778	166.059	1395.56	411.263	Infected pos	2	5	1
62.4677	193.116	1871.42	823.724	Infected pos	2	5	1
75.0485	176.817	1728.52	557.873	Infected pos	2	5	1
78.5463	259.633	1800.05	570.171	Infected pos	2	5	1
71.4575	240.757	1914.88	706.462	Infected pos	2	5	1
77.906	234.01	1497.2	496.887	Infected pos	2	5	1
77.8891	248.298	1604.57	537.715	Infected pos	2	5	1
76.6111	259.915	1742.78	596.823	Infected pos	2	5	1
74.8469	243.875	1848.88	633.184	Infected pos	2	5	1
72.143	164.9	1444.19	521.3	Infected pos	2	5	1
80.3858	227.817	1614.59	493.331	Infected pos	2	5	1
80.7819	166.609	1544.41	427.733	Infected pos	2	5	1
81.0623	167.84	1752.8	456.108	Infected pos	2	5	1
81.7673	250.891	2021.82	561.773	Infected pos	2	5	1
72.3927	278.854	1101.31	483.527	Infected pos	2	5	1
81.2341	289.124	1848.78	572.474	Infected pos	2	5	1
78.98	264.683	1803.92	573.324	Infected pos	2	5	1
77.4258	271.241	1538.15	542.469	Infected pos	2	5	1
76.9044	181.428	1711.19	529.565	Infected pos	2	5	1
75.7162	335.531	1806.4	681.15	Infected pos	2	5	1
78.4699	291.867	1640.66	563.984	Infected pos	2	5	1
80.027	312.955	1644.07	561.04	Infected pos	2	5	1
79.4514	236.014	1955.45	577.304	Infected pos	2	5	1
57.2682	226.389	2510.52	1229.12	Infected pos	2	5	1
78.9218	245.731	1605.2	520.192	Infected pos	2	5	1
79.045	284.908	1941.09	609.667	Infected pos	2	5	1
76.2867	188.134	1493.32	492.648	Infected pos	2	5	1
77.8361	251.573	1694.78	563.05	Infected pos	2	5	1
79.2422	246.422	1807.65	541.242	Infected pos	2	5	1
78.027	208.005	1140.7	400.981	Infected pos	2	5	1
75.2951	181.614	1612.42	533.7	Infected pos	2	5	1
76.838	197.517	1563.73	509.274	Infected pos	2	5	1
75.0278	260.814	1385.91	522.841	Infected pos	2	5	1
75.1353	223.821	1512.05	530.155	Infected pos	2	5	1
78.7672	294.415	1824.83	607.103	Infected pos	2	5	1
76.0206	121.856	1753.65	518.904	Infected pos	2	5	1
78.8501	236.718	1839.14	559.435	Infected pos	2	5	1
78.4843	260.37	1404.06	483.404	Infected pos	2	5	1
80.4923	256.15	1347.62	456.301	Infected pos	2	5	1
81.0139	202.009	1699.88	485.934	Infected pos	2	5	1
77.653	275.363	1857.24	624.504	Infected pos	2	5	1
77.6434	270.623	1535.89	550.796	Infected pos	2	5	1
73.7476	191.663	2095.45	680.69	Infected pos	2	5	1
78.7526	165.782	1405.42	422.924	Infected pos	2	5	1
66.8559	206.9	1933.68	781.324	Infected pos	2	5	1
75.8618	178.276	1769.11	558.051	Infected pos	2	5	1
73.9889	231.049	1992.31	681.25	Infected pos	2	5	1
78.4973	279.899	1637.37	558.598	Infected pos	2	5	1
71.8822	195.326	1657.19	598.427	Infected pos	2	5	1
74.7101	190.045	1461.45	506.623	Infected pos	2	5	1
76.3456	230.568	1852.42	610.658	Infected pos	2	5	1
77.5269	212.987	1532.57	497.964	Infected pos	2	5	1
75.7149	260.571	1721.14	604.699	Infected pos	2	5	1
73.6805	226.294	1628.9	590.966	Infected pos	2	5	1
79.7692	238.887	1648.59	517.459	Infected pos	2	5	1
77.5668	207.587	1911.67	588.293	Infected pos	2	5	1
77.4853	251.978	1141.74	441.665	Infected pos	2	5	1
82.7941	297.984	1715.99	534.334	Infected pos	2	5	1
70.275	163.069	1380.94	525.242	Infected pos	2	5	1
74.2603	205.841	1591.98	558.847	Infected pos	2	5	1
74.255	150.246	1189.12	415.932	Infected pos	2	5	1
74.8671	218.03	1635.94	570.731	Infected pos	2	5	1
77.0061	280.16	1614.17	574.458	Infected pos	2	5	1
73.9498	220.264	1534.5	558.672	Infected pos	2	5	1
80.4308	194.6	1631.01	465.578	Infected pos	2	5	1
62.5443	260.078	2146.3	958.365	Infected pos	2	5	1
75.8012	194.876	1535.72	514.683	Infected pos	2	5	1
74.3955	212.322	1508.21	540.221	Infected pos	2	5	1
78.0632	256.288	1667.34	555.329	Infected pos	2	5	1
83.9415	287.739	1678.9	485.345	Infected pos	2	5	1
75.042	256.719	1804.6	632.896	Infected pos	2	6	1
75.0723	281.992	2001.53	693.919	Infected pos	2	6	1
78.1323	311.345	1998.43	656.381	Infected pos	2	6	1
78.8019	310.854	2120.14	669.582	Infected pos	2	6	1
68.5476	205.762	1780.75	708.782	Infected pos	2	6	1
81.2516	304.007	1727.97	552.583	Infected pos	2	6	1
73.1932	332.241	2204.21	821.301	Infected pos	2	6	1
75.4432	264.867	1918.26	660.984	Infected pos	2	6	1
73.8567	230.771	1916.57	662.408	Infected pos	2	6	1
79.178	261.887	1575.91	521.118	Infected pos	2	6	1
81.0937	309.749	1656.6	545.254	Infected pos	2	6	1
76.1666	261.912	1634.8	569.31	Infected pos	2	6	1
79.0489	265.801	1916.73	587.832	Infected pos	2	6	1
76.8025	257.985	1790.42	599.12	Infected pos	2	6	1
77.8813	240.933	1614.07	524.28	Infected pos	2	6	1
81.5862	294.244	1775.97	549.645	Infected pos	2	6	1
76.1231	268.014	2129.01	706.492	Infected pos	2	6	1
82.6204	336.33	2448	682.526	Infected pos	2	6	1
74.8961	224.893	1641.45	568.046	Infected pos	2	6	1
78.3286	283.176	1858.04	605.117	Infected pos	2	6	1
78.4794	228.141	1683.46	531.458	Infected pos	2	6	1
75.8167	232.657	1624.95	557.808	Infected pos	2	6	1
75.2046	268.669	1814.7	646.202	Infected pos	2	6	1
76.1009	276.76	1763.07	617.954	Infected pos	2	6	1
78.2474	285.875	1901.96	611.537	Infected pos	2	6	1
69.4919	217.285	1707.91	668.195	Infected pos	2	6	1
76.4053	212.079	1599.56	533.783	Infected pos	2	6	1
72.0322	234.947	1893.67	690.692	Infected pos	2	6	1
76.7593	295.845	1918.51	662.178	Infected pos	2	6	1
68.3006	193.192	1861.34	719.378	Infected pos	2	6	1
73.3666	216.956	1867.1	652.969	Infected pos	2	6	1
71.7593	193.629	1580.57	581.761	Infected pos	2	6	1
75.4365	200	1344.18	473.68	Infected pos	2	6	1
69.6916	194.533	1536.48	598.766	Infected pos	2	6	1
79.2361	341.214	1960.86	650.489	Infected pos	2	6	1
77.3507	242.904	1896.85	601.876	Infected pos	2	6	1
74.8565	242.212	1530.22	555.551	Infected pos	2	6	1
78.9974	258.884	1882.44	589.517	Infected pos	2	6	1
79.7718	222.848	1631.17	490.272	Infected pos	2	6	1
75.0536	266.107	2016.66	692.423	Infected pos	2	6	1
74.9533	216.043	1580.45	550.713	Infected pos	2	6	1
83.1518	281.926	2085.35	567.749	Infected pos	2	6	1
80.3658	305.358	1653.42	559.403	Infected pos	2	6	1
80.1404	249.978	1534.25	485.723	Infected pos	2	6	1
76.024	208.382	1566.58	530.032	Infected pos	2	6	1
73.2042	244.319	1655.62	608.859	Infected pos	2	6	1
77.4335	199.894	1376.53	459.217	Infected pos	2	6	1
78.3234	254.305	1604.42	540.7	Infected pos	2	6	1
76.8104	233.836	1750.79	571.505	Infected pos	2	6	1
79.5936	281.586	1836.31	596	Infected pos	2	6	1
71.9729	218.851	1637.42	609.487	Infected pos	2	6	1
79.4474	276.994	1901.49	601.629	Infected pos	2	6	1
79.7124	297.613	1613.96	545.759	Infected pos	2	6	1
75.8654	268.336	1588.62	580.588	Infected pos	3	1	1	222
78.3514	293.751	1834.13	611.383	Infected pos	3	1	1
77.5928	209.023	1682.25	532.238	Infected pos	3	1	1
75.9777	283.075	2327.9	765.974	Infected pos	3	1	1
69.8835	326.838	2467.46	968.601	Infected pos	3	1	1
76.8367	290.045	1786.75	625.436	Infected pos	3	1	1
76.143	285.115	1800.19	641.74	Infected pos	3	1	1
78.3425	295.821	1933.81	640.948	Infected pos	3	1	1
76.8499	275.068	1915.73	651.967	Infected pos	3	1	1
73.4558	234.706	2177.47	745.585	Infected pos	3	1	1
78.4746	242.676	1808.26	573.011	Infected pos	3	1	1
75.5126	237.744	1760.62	601.625	Infected pos	3	1	1
78.4487	247.753	1672.64	540.36	Infected pos	3	1	1
74.401	249.242	1781.93	633.471	Infected pos	3	1	1
77.1456	204.985	1484.12	486.989	Infected pos	3	1	1
73.7832	227.759	1586.54	576.087	Infected pos	3	1	1
66.6146	209.747	1753.16	723.109	Infected pos	3	1	1
76.738	180.436	1429.56	472.806	Infected pos	3	1	1
76.6542	264.649	1621.4	565.658	Infected pos	3	1	1
76.1981	251.937	1615.64	571.166	Infected pos	3	1	1
73.9226	196.835	1612.45	565.191	Infected pos	3	1	1
75.9241	257.583	1705.11	599.197	Infected pos	3	1	1
74.2175	232.262	1671.59	599.346	Infected pos	3	1	1
74.1297	203.915	1619.66	566.008	Infected pos	3	1	1
76.3288	213.262	1684.08	556.062	Infected pos	3	1	1
76.3066	211.323	1608.64	537.44	Infected pos	3	1	1
74.1638	293.229	2038.83	735.596	Infected pos	3	1	1
74.9076	223.405	1583.1	553.024	Infected pos	3	1	1
76.706	253.465	1680.71	575.607	Infected pos	3	1	1
76.6051	264.191	1951.64	650.89	Infected pos	3	1	1
75.688	229.7	1673.1	574.666	Infected pos	3	1	1
75.5175	181.284	1549.76	514.269	Infected pos	3	1	1
75.6163	220.105	1627.64	557.945	Infected pos	3	1	1
74.9491	188.17	1769.43	578.935	Infected pos	3	1	1
81.2331	277.297	1767.04	555.303	Infected pos	3	1	1
76.9466	247.631	1694.61	570.195	Infected pos	3	1	1
76.1668	206.478	1595.54	530.663	Infected pos	3	1	1
78.5294	211.353	1494.19	481.919	Infected pos	3	1	1
75.2539	221.242	1616.02	562.785	Infected pos	3	1	1
75.7972	242.938	1586.87	564.412	Infected pos	3	1	1
76.9952	307.795	1858.89	654.467	Infected pos	3	1	1
76.4662	202.81	1541.71	513.199	Infected pos	3	1	1
77.4865	228.781	1686.37	544.622	Infected pos	3	1	1
76.7695	227.385	1584.37	531.081	Infected pos	3	1	1
76.1079	135.419	2008.46	586.434	Infected pos	3	1	1
76.6707	207.12	1747.98	562.589	Infected pos	3	1	1
76.0452	213.689	1999.5	638.264	Infected pos	3	1	1
75.1308	292.229	1829.69	662.461	Infected pos	3	1	1
78.0341	218.147	1632.51	542.15	Infected pos	3	1	1
77.3971	259.812	1653.06	566.113	Infected pos	3	1	1
70.762	247.136	1927.42	770.5	Infected pos	3	1	1
72.0835	196.676	1557.54	573.72	Infected pos	3	1	1
74.3389	246.735	1782.4	632.817	Infected pos	3	1	1
75.5369	202.82	1611.33	540.055	Infected pos	3	1	1
82.2177	135.717	1879.92	439.869	Infected pos	3	1	1
75.4919	228.756	1708.58	584.07	Infected pos	3	1	1
74.4742	225.269	2105.56	706.201	Infected pos	3	1	1
76.4991	244.254	1881.25	618.657	Infected pos	3	1	1
74.1752	230.007	1552.01	568.268	Infected pos	3	1	1
78.5709	236.624	1679.46	539.589	Infected pos	3	1	1
77.8153	225.248	1554.02	516.78	Infected pos	3	1	1
70.5702	261.729	2026.43	804.404	Infected pos	3	1	1
74.5871	250.968	1912.72	672.21	Infected pos	3	1	1
74.9757	231.073	1725.06	600	Infected pos	3	1	1
70.0747	166.96	2283.41	802.31	Infected pos	3	1	1
73.5616	592.888	2482.47	1087.61	Infected pos	3	1	1
74.1714	251.599	1687.16	614.118	Infected pos	3	1	1
77.8084	206.937	1755.05	543.952	Infected pos	3	1	1
77.0808	165.388	1684.11	524.723	Infected pos	3	1	1
75.4331	358.556	2113.57	781.855	Infected pos	3	1	1
34.6046	533.535	2950.44	2115.07	Infected pos	3	1	1
74.0953	255.86	1835.03	672.695	Infected pos	3	1	1
79.4149	167.093	2154.18	562.781	Infected pos	3	1	1
79.1134	130.902	1735.16	451.016	Infected pos	3	1	1
71.5637	208.727	1635.43	612.206	Infected pos	3	1	1
74.0052	247.487	2064.78	712.35	Infected pos	3	1	1
75.5361	241.633	1758.76	607.187	Infected pos	3	1	1
73.6879	207.21	1662.6	586.579	Infected pos	3	1	1
79.003	283.525	1750.85	579.207	Infected pos	3	1	1
75.1952	232.903	1732.03	598.951	Infected pos	3	1	1
80.1624	217.671	1781.26	521.752	Infected pos	3	1	1
77.096	274.121	1871.33	622.367	Infected pos	3	1	1
76.8384	313.334	1905.07	659.718	Infected pos	3	1	1
77.6085	274.646	1840.42	610.403	Infected pos	3	1	1
76.2928	287.993	1912.51	655.105	Infected pos	3	1	1
75.2768	265.79	1636.47	584.355	Infected pos	3	1	1
80.584	235.73	1748.13	521.48	Infected pos	3	1	1
79.2305	215.465	1547.79	485.588	Infected pos	3	1	1
78.9783	272.759	1791.93	580.954	Infected pos	3	1	1
75.2382	162.553	1516.52	494.204	Infected pos	3	1	1
76.632	286.879	1622.64	589.414	Infected pos	3	2	1
74.7135	275.769	1934.42	687.477	Infected pos	3	2	1
69.7441	505.619	2473.79	1084.1	Infected pos	3	2	1
70.7192	317.655	2103.54	834.994	Infected pos	3	2	1
75.946	310.916	2031.92	716.006	Infected pos	3	2	1
73.6777	328.468	2124.36	790.45	Infected pos	3	2	1
75.9752	254.979	1754.12	610.148	Infected pos	3	2	1
70.2847	171.526	1467.13	554.568	Infected pos	3	2	1
76.3401	330.115	2046.59	717.513	Infected pos	3	2	1
72.3879	277.537	2184.96	799.684	Infected pos	3	2	1
77.3343	295.159	1719.1	607.953	Infected pos	3	2	1
75.7342	303.471	2068.57	721.038	Infected pos	3	2	1
74.7053	435.134	2454.81	921.578	Infected pos	3	2	1
72.0783	290.946	1955.48	745.641	Infected pos	3	2	1
79.4715	305.658	1781.67	593.684	Infected pos	3	2	1
75.2664	263.544	1744.16	625.176	Infected pos	3	2	1
71.8372	230.363	1908.55	697.955	Infected pos	3	2	1
75.418	227.842	1833.39	618.912	Infected pos	3	2	1
77.0727	313.625	1895.3	660.361	Infected pos	3	2	1
76.3813	279.715	1791.7	634.784	Infected pos	3	2	1
76.4969	369.23	2163.44	774.625	Infected pos	3	2	1
74.5366	368.847	2066.73	790.293	Infected pos	3	2	1
76.1455	271.369	1993.13	674.759	Infected pos	3	2	1
73.2582	231.904	1842.85	655.957	Infected pos	3	2	1
74.6464	300.148	1923.34	697.325	Infected pos	3	2	1
78.0742	233.383	1679.82	543.723	Infected pos	3	2	1
73.3462	229.539	1690.5	614.493	Infected pos	3	2	1
75.1307	271.095	1964.52	674.961	Infected pos	3	2	1
76.09	184.238	1769.37	557.354	Infected pos	3	3	1
74.9626	211.073	1963.31	643.759	Infected pos	3	3	1
77.8243	179.567	1635.59	500.47	Infected pos	3	3	1
76.4819	207.179	1634.75	542.55	Infected pos	3	3	1
78.4398	210.668	1435.39	479.638	Infected pos	3	3	1
73.1729	241.256	1819.81	660.185	Infected pos	3	3	1
75.3896	214.105	1694.49	566.196	Infected pos	3	3	1
81.5871	171.179	1283.98	379.637	Infected pos	3	3	1
75.7943	186.511	1512.66	506.997	Infected pos	3	3	1
75.4216	228.18	1760.34	599.593	Infected pos	3	3	1
76.7081	275.377	1906.05	645.403	Infected pos	3	3	1
75.5666	193.898	1691.26	553.848	Infected pos	3	3	1
78.4948	206.388	1636.77	506.662	Infected pos	3	3	1
77.5726	153.784	1602.22	477.695	Infected pos	3	3	1
78.656	199.043	1504.59	471.878	Infected pos	3	3	1
78.7741	144.582	1588.18	423.482	Infected pos	3	3	1
89.1647	81.3579	1020.14	194.142	Infected pos	3	3	1
77.5204	223.542	1982.81	613.741	Infected pos	3	3	1
81.6666	177.021	1498.06	411.745	Infected pos	3	3	1
75.6662	202.573	1384.07	487.89	Infected pos	3	3	1
86.8785	96.7013	1742.44	301.402	Infected pos	3	3	1
79.5149	143.221	1426.96	407.01	Infected pos	3	3	1
76.8412	148.625	1455.73	449.122	Infected pos	3	3	1
73.0631	177.202	1709.86	588.59	Infected pos	3	3	1
76.9247	286.529	1875.4	632.204	Infected pos	3	3	1
77.1722	198.607	1601.52	510.102	Infected pos	3	3	1
81.9146	101.546	1990.99	435.282	Infected pos	3	3	1
94.0015	56.0626	1527.12	148.235	Infected pos	3	3	1
75.1124	143.654	1408.92	455.269	Infected pos	3	3	1
78.8245	213.465	1629.85	511.622	Infected pos	3	3	1
77.7214	150.12	1582.5	466.523	Infected pos	3	3	1
72.0158	208.506	1890.54	674.993	Infected pos	3	3	1
78.5678	194.968	1549.82	483.258	Infected pos	3	3	1
81.4921	173.185	1550.06	427.855	Infected pos	3	3	1
83.8604	132.508	1608.88	370.153	Infected pos	3	3	1
79.8412	174.795	1661.58	477	Infected pos	3	3	1
76.9921	179.648	1440.18	472.04	Infected pos	3	3	1
78.4631	248.323	1787.59	573.772	Infected pos	3	3	1
76.3866	283.519	1822.55	630.827	Infected pos	3	3	1
77.0556	288.183	1984.39	671.42	Infected pos	3	3	1
75.4023	294.444	2004.57	699.092	Infected pos	3	3	1
55.8079	275.412	2503.82	1269.48	Infected pos	3	3	1
83.1434	201.957	1711.14	452.936	Infected pos	3	3	1
76.991	269.546	1849.05	623.788	Infected pos	3	3	1
77.502	244.657	1727.46	567.474	Infected pos	3	3	1
79.3053	280.754	2010.16	624.943	Infected pos	3	3	1
78.5035	314.636	1910.61	646.52	Infected pos	3	3	1
77.468	255.119	1847.39	606.031	Infected pos	3	3	1
75.4856	260.576	1606.73	583.969	Infected pos	3	3	1
75.4449	234.292	1723.81	596.774	Infected pos	3	3	1
81.9669	212.345	1743.41	481.245	Infected pos	3	3	1
81.1485	115.881	1686.28	388.526	Infected pos	3	3	1
77.0872	298.322	1961.09	672.517	Infected pos	3	3	1
70.0713	159.798	1540.36	575.215	Infected pos	3	4	1
75.3116	188.003	2136.04	665.608	Infected pos	3	4	1
76.9527	302.01	2162.5	701.546	Infected pos	3	4	1
77.6481	241.31	1879.62	589.524	Infected pos	3	4	1
75.1818	220.726	1890.16	633.317	Infected pos	3	4	1
76.4583	276.982	1836.34	635.432	Infected pos	3	4	1
76.2738	282.543	1876.97	650.988	Infected pos	3	4	1
73.7088	248.601	1762.74	640.297	Infected pos	3	4	1
72.7283	216.127	1945.3	685.794	Infected pos	3	4	1
76.4187	227.878	1820.08	593.013	Infected pos	3	4	1
76.6326	252.182	1863.39	617.2	Infected pos	3	4	1
74.1083	265.141	1919.53	683.474	Infected pos	3	4	1
76.8649	228.511	1819.91	582.669	Infected pos	3	4	1
78.1424	220.896	1650.94	526.305	Infected pos	3	4	1
72.9635	291.682	2179.24	796.297	Infected pos	3	4	1
72.586	247.527	2002.78	715.904	Infected pos	3	4	1
72.4433	204.69	1725.39	623.698	Infected pos	3	4	1
71.0247	190.013	1848.48	672.604	Infected pos	3	4	1
91.408	47.0461	1092.32	137.408	Infected pos	3	4	1
93.1367	40.054	1141.7	117.416	Infected pos	3	4	1
77.9274	275.184	2002.5	651.005	Infected pos	3	4	1
91.693	47.6674	1150.3	138.252	Infected pos	3	4	1
72.6865	215.099	1635.4	599.939	Infected pos	3	4	1
73.0271	194.757	1566.3	560.611	Infected pos	3	4	1
74.6402	397.462	2090.57	812.808	Infected pos	3	5	1
75.3628	331.086	1929.5	719.677	Infected pos	3	5	1
75.3156	461.158	2574.65	960.838	Infected pos	3	5	1
75.1703	261.987	1848.55	651.027	Infected pos	3	5	1
76.8129	287.702	1891.96	649.69	Infected pos	3	5	1
69.9083	180.944	2006.17	731.326	Infected pos	3	5	1
78.6144	188.352	2002.21	574.689	Infected pos	3	5	1
77.2625	370.375	2325.96	802.68	Infected pos	3	5	1
75.057	106.477	2230.86	648.199	Infected pos	3	5	1
72.6728	415.614	2478.18	961.29	Infected pos	3	5	1
73.8364	408.061	2283.66	888.983	Infected pos	3	5	1
81.4528	113.866	2027.4	472.373	Infected pos	3	5	1
74.3047	559.717	3320.29	1229.13	Infected pos	3	5	1
77.324	217.025	1653.02	538.429	Infected pos	3	5	1
75.2287	239.08	1832.38	628.419	Infected pos	3	5	1
76.4178	178.226	1643.6	521.52	Infected pos	3	5	1
74.9732	252.207	1741.38	615.021	Infected pos	3	5	1
79.1538	316.218	2147.75	688.157	Infected pos	3	5	1
75.2479	241.833	2004.71	667.63	Infected pos	3	5	1
73.721	319.991	1972.58	743.577	Infected pos	3	5	1
73.9792	166.724	1635	548.648	Infected pos	3	5	1
76.2615	220.907	1740.72	576.039	Infected pos	3	5	1
71.9334	200.413	1668.78	607.905	Infected pos	3	5	1
79.1385	269.993	1792.79	579.007	Infected pos	3	5	1
76.2291	262.624	1835.78	634.174	Infected pos	3	5	1
77.1612	215.186	1596.89	522.849	Infected pos	3	5	1
71.8685	149.696	1268.05	461.48	Infected pos	3	5	1

## Sheet: FLIM statistics
Statistical results of zebrafish autofluorescence data
Mean+/-95%CI
Comparison between groups showing the overall effect; computed as fold change (ratio) or simple difference with 95%CI and p values; p<0.05
FIGURE 2	NAD(P)H tm (ps)	NAD(P)H t1 (ps)	NAD(P)H t2 (ps)	NAD(P)H a1 (%)
Control GFP-	667.9 (609.5, 732.0)	271.5 (243.4, 302.8)	1966.2 (1872.8, 2064.3)	75.4 (74.2, 76.7)
Control GFP+	840.4 (742.3, 951.5)	385.5 (329.8, 450.6)	2417.0 (2292.5, 2548.2)	73.3 (71.6, 75.0)
Lm-infected GFP-	574.9 (540.2, 611.9)	210.8 (194.2, 228.9)	1779.4 (1711.2, 1850.3)	76.3 (75.2, 77.3)
Lm-infected GFP+	723.4 (614.8, 851.2)	299.3 (237.2, 377.7)	2187.4 (2060.0, 2322.6)	74.1 (72.0, 76.3)
Infected / Control; p value	0.79 (0.68, 0.94); 0.0075	0.70 (0.56, 0.88); 0.0033	0.81 (0.76, 0.88); <0.001	p=0.056
GFP+ / GFP-; p value	0.86 (0.79, 0.94); 0.0024	0.78 (0.69, 0.88); <0.001	0.91 (0.88, 0.93); <0.001	p=0.245
