# Supplementary material for: In vivo fluorescence lifetime imaging of macrophage intracellular metabolism during wound responses in zebrafish
Source: eLife. 2022 Feb 24;11:e66080. doi: 10.7554/eLife.66080 (PMC8871371; doi:10.7554/eLife.66080)
Supplement: Figure 3—source data 1. [file elife-66080-fig3-data1.xlsx]

## Sheet: Figure 3
F.a1.out	F.t1.out	F.t2.out	F.tm.out	N.a1.out	N.t1.out	N.t2.out	N.tm.out	rr.out	Group	Fish	Repeat	counts
78.3632	113.94	1132.67	299.688	75.806	210.675	1521.78	516.782	0.390196	Infected	1	1	350
78.7516	130.434	1298.24	338.458	78.7173	207.864	1645.67	506.212	0.357753	Infected	1	1
77.2527	137.899	1270.78	333.549	74.1857	278.403	1814.75	658.593	0.493216	Infected	1	1
79.6214	170.364	1709.32	402.478	73.153	349.881	2226.69	845.049	0.496647	Infected	1	1
78.298	119.807	1303.78	322.772	78.1104	209.039	1897.82	572.888	0.442358	Infected	1	1
75.2119	111.566	1241.51	339.702	73.2981	187.523	1605.41	561.083	0.435234	Infected	1	1
78.5135	98.8024	958.748	250.864	79.7716	227.462	1677.54	512.48	0.448498	Infected	1	1
77.6982	183.955	1287.33	377.734	81.2994	273.921	1669.19	524.797	0.548738	Infected	1	1
79.7451	109.701	989.363	259.175	81.2279	207.698	1426.98	433.271	0.47729	Infected	1	1
78.4506	152.902	1235.53	336.553	80.7888	265.037	1697.59	527.892	0.498171	Infected	1	1
80.0932	161.131	1145.7	311.425	80.913	252.646	1700.31	517.472	0.519142	Infected	1	1
75.1418	115.68	1253.02	326.397	74.6283	221.919	1709.58	597.213	0.474716	Infected	1	1
76.8406	144.644	1275.98	346.071	77.4601	260.657	1854.32	614.377	0.502377	Infected	1	1
80.1679	81.7183	1012.28	222.54	79.8329	149.643	1565.21	426.299	0.393918	Infected	1	1
87.4732	56.7664	753.333	132.843	82.2038	174.246	1516.88	407.386	0.454237	Infected	1	1
80.6361	132.671	1124.75	294.155	78.4978	263.744	1860.28	618.702	0.458701	Infected	1	1
78.616	133.481	1348.34	330.119	71.8118	386.597	2549.24	976.663	0.552266	Infected	1	1
80.3658	133.223	1577.53	365.275	71.4077	317.051	2570.41	953.487	0.500399	Infected	1	1
75.6443	206.663	1650.01	471.406	77.4953	274.765	2071.16	658.386	0.50153	Infected	1	1
76.7222	209.416	1382.43	414.691	79.8394	280.623	1732.47	557.793	0.553989	Infected	1	1
77.281	183.5	1575.04	433.057	76.8398	301.39	1860.88	651.546	0.504237	Infected	1	1
82.8687	108.103	1059.84	245.779	78.0285	257.233	1852.86	586.427	0.523651	Infected	1	1
81.4177	117.712	1191.63	283.079	78.4603	256.359	2181.67	668.158	0.453294	Infected	1	1
74.7377	146.508	1241.41	355.455	76.9057	209.486	1565.37	514.175	0.413901	Infected	1	1
79.8319	187.197	1537.95	386.969	76.758	329.31	2201	759.467	0.563342	Infected	1	1
77.9812	174.25	1427.16	396.213	79.1941	257.968	1679.53	542.863	0.557511	Infected	1	1
80.0937	145.113	1264.71	317.436	79.3387	215.92	1648.25	503.369	0.471426	Infected	1	1
75.2309	170.626	1091.67	337.415	79.1129	291.273	1632.71	551.277	0.606361	Infected	1	1
79.668	159.141	1107.24	309.684	80.5286	253.728	1565.88	495.213	0.534986	Infected	1	1
76.4121	193.507	1375.13	392.44	78.1361	316.057	1946.85	663.23	0.59677	Infected	1	1
71.7725	217.506	1712.53	512.183	69.4921	434.161	2572.2	1079.03	0.576075	Infected	1	1
72.5557	186.198	1804.47	513.896	71.1649	629.803	3234.51	1352.24	0.566657	Infected	1	1
71.5803	217.181	1591.76	484.548	71.574	337.682	2625.51	975.344	0.623963	Infected	1	1
77.6535	215.47	1385.64	373.048	78.1307	311.024	2300.7	730.529	0.667624	Infected	1	1
81.6722	143.965	1259.07	303.619	80.1399	270.546	2012.93	534.023	0.462596	Infected	1	1
83.3771	60.3639	772.353	163.978	80.3032	168.152	1270.7	383.256	0.404214	Infected	1	1
83.0895	101.634	974.529	227.357	79.5584	201.437	1325.64	426.074	0.461208	Infected	1	1
77.9763	106.394	1002.08	268.223	77.8906	202.49	1480.82	475.98	0.469029	Infected	1	1
80.4397	174.367	1800.36	401.022	75.226	472.738	2796.8	1042.51	0.528233	Infected	1	1
78.8183	176.066	1433.7	371.949	77.5733	294.129	1945.18	661.605	0.554256	Infected	1	1
81.0116	124.504	1247.7	304.176	77.0175	205.306	1804.37	569.081	0.464255	Infected	1	1
78.1738	136.356	1138.49	310.761	79.7826	227.153	1641.85	507.373	0.463109	Infected	1	1
79.7704	200.109	1467.75	390.327	79.0201	351.732	2560.01	799.262	0.579137	Infected	1	1
75.8469	186.684	1156.8	356.346	77.2813	283.324	1837.98	630.737	0.626985	Infected	1	1
77.5942	201.154	1479.71	410.871	78.5113	311.824	2015.67	670.471	0.587055	Infected	1	1
82.2342	138.037	1343.66	303.2	74.2844	229.396	1651.38	591.571	0.522038	Infected	1	1
77.5398	193.594	1422.64	414.491	78.6579	267.388	1822.84	590.247	0.54277	Infected	1	1
78.7748	185.85	1487.42	387.006	78.8009	282.497	1936.96	615.359	0.523073	Infected	1	1
80.6508	128.368	1213.27	302.079	78.316	236.042	1662.16	545.1	0.517789	Infected	1	1
78.6008	152.76	1281.72	338.224	76.8375	282.904	2060.22	684.219	0.543108	Infected	1	1
78.2061	94.2829	1197.93	293.675	75.9317	161.679	1843.25	561.678	0.451409	Infected	1	1
77.9334	184.577	1546.9	384.356	74.8653	358.651	2679.68	919.946	0.611174	Infected	1	1
75.0139	112.578	1195.2	324.286	75.7304	242.477	1837.22	625.967	0.495946	Infected	1	1
81.7464	81.1216	981.359	213.845	52.9713	247.676	2647.42	1376.91	0.641031	Infected	1	1
81.0035	97.2147	1057.84	258.575	80.0108	197.574	1494.99	443.681	0.320122	Infected	1	1
76.4659	121.582	1214.16	335.032	75.9364	242.421	2061.52	670.56	0.437027	Infected	1	1
79.7942	101.699	1158.39	273.669	77.9031	193.897	1730.35	521.407	0.394723	Infected	1	1
77.7774	179.601	1662.04	466.316	76.7152	217.682	1759.11	569.161	0.379663	Infected	1	1
76.2376	178.512	1195.65	364.89	75.1343	295.332	1848.42	669.093	0.487074	Infected	1	1
77.5905	116.885	1247.76	325.826	74.5955	196.065	1680.29	573.173	0.447748	Infected	1	1
77.7784	106.882	1091.53	280.732	76.0552	193.891	1766.86	567.912	0.390447	Infected	1	1
77.1468	109.217	1144	299.872	76.9406	195.164	1644.17	525.285	0.355111	Infected	1	1
77.3394	102.201	1241.05	314.296	77.0719	168.427	1484.98	465.962	0.323889	Infected	1	1
76.6614	136.472	1149.26	301.72	78.1685	197.158	1705.4	517.424	0.404477	Infected	1	1
76.6985	147.322	1303.81	364.066	77.5279	268.644	1958.37	644.334	0.505249	Infected	1	1
78.8144	185.183	1372.85	366.572	82.5191	266.876	1874.76	531.691	0.557265	Infected	1	1
77.9407	120.215	1196.71	306.322	80.1325	217.732	1724.52	508.237	0.361486	Infected	1	1
74.3077	190.608	1591.89	480.211	72.0111	383.647	2350.52	914.868	0.534479	Infected	1	1
80.0897	157.353	1303.95	346.074	78.5311	257.731	1801.2	574.747	0.556689	Infected	1	1
80.1192	87.6347	1108.04	252.828	78.4495	199.513	1661.72	505.196	0.429909	Infected	1	1
77.2401	145.313	1422.01	386.185	75.7931	288.739	2196.2	746.586	0.507703	Infected	1	1
76.0151	195.746	1713.52	460.703	74.1292	480.598	2933.46	1084.9	0.63186	Infected	1	1
77.2139	115.546	1313.59	347.335	77.3599	195.05	1743.19	539.691	0.430595	Infected	1	1
81.149	145.687	1318.7	316.815	81.1561	250.509	1878.42	554.219	0.558523	Infected	2	1
77.857	161.479	1304.83	349.538	77.9859	274.311	1831.55	605.448	0.568913	Infected	2	1
79.1204	178.818	1273.63	340.987	79.3298	250.608	1778.71	538.092	0.5382	Infected	2	1
77.637	149.088	1356.27	361.509	78.0214	241.626	1753.43	564.28	0.456876	Infected	2	1
79.4877	150.161	1289.31	328.822	78.8559	251.256	1769.03	561.638	0.547292	Infected	2	1
76.8673	134.683	1216.72	320.334	76.8213	262.807	1753.63	594.581	0.437559	Infected	2	1
84.9842	98.4129	1190.87	235.594	83.5246	209.06	1923.2	491.385	0.540045	Infected	2	1
91.7821	42.6618	1008.74	120.892	88.7844	102.019	1716.68	287.463	0.53654	Infected	2	1
83.1392	138.919	1382.81	298.129	80.9702	201.562	1694.58	477.754	0.533342	Infected	2	1
83.6894	77.9282	927.144	190.019	81.9499	250.782	2035.37	525.783	0.375251	Infected	2	1
81.356	151.038	1503.99	349.99	80.7537	237.927	1751.47	519.436	0.513778	Infected	2	1
80.5219	114.397	1185.96	281.794	79.0639	211.542	1705.15	486.726	0.415451	Infected	2	1
79.4239	211.379	1375.04	396.475	81.6891	299.019	1964.14	590.722	0.581829	Infected	2	1
80.1866	219.921	1458.16	401.471	81.6866	298.701	1949.33	586.431	0.592946	Infected	2	1
79.0521	158.493	1301.9	341.051	79.0096	254.649	1949.52	603.844	0.564626	Infected	2	1
73.9873	192.627	1525.52	423.476	76.732	334.402	2020.78	711.328	0.582572	Infected	2	1
85.2932	99.6381	1222.91	235.689	83.325	175.942	1977.3	465.001	0.56418	Infected	2	1
77.3446	154.305	1325.99	363.147	74.707	257.948	1580.43	571.48	0.533354	Infected	2	1
77.2765	196.741	1484.11	429.49	77.6553	269.815	1883.79	618.33	0.572426	Infected	2	1
92.3441	34.1369	932.317	89.4269	89.7818	68.2222	1360.68	194.567	0.505901	Infected	2	1
79.1613	154.374	1327.81	336.678	79.7202	281.796	1900.08	583.548	0.502195	Infected	2	1
78.2121	199.004	1477.82	402.224	79.1606	272.354	1726.94	561.178	0.539633	Infected	2	1
78.3115	180.246	1423.6	382.612	78.8402	299.552	2062.46	629.075	0.469782	Infected	2	1
77.4833	179.976	1446.35	406.064	77.7319	268.536	1883.06	598.442	0.461056	Infected	2	1
76.1263	130.827	1156.75	320.758	78.5692	312.96	2130.97	687.521	0.40527	Infected	2	1
62.1465	179.138	1734.98	685.572	72.5106	315.808	2068.34	787.176	0.434268	Infected	2	1
76.0905	185.264	1546.6	435.765	76.6148	294.729	2197.06	726.196	0.571673	Infected	2	1
78.7205	209.94	1681.44	422.453	77.0153	277.379	2205.41	705.361	0.63536	Infected	2	1
77.208	172.764	1588.07	417.036	77.5184	231.851	1900.77	598.332	0.519364	Infected	2	1
79.4007	151.754	1475.51	373.762	78.0187	283.361	2068.08	664.658	0.512087	Infected	2	1
79.1093	135.636	1501.58	372.863	78.675	236.781	1978.04	600.749	0.491769	Infected	2	1
97.752	20.194	802.056	33.7498	96.9802	21.195	1519.71	66.0196	0.540892	Infected	2	1
79.3258	165.041	1383.36	356.947	77.4052	266.999	1953.22	633.936	0.548136	Infected	2	1
79.4315	142.247	1371.24	331.408	77.0389	242.927	1872.22	606.556	0.514445	Infected	2	1
86.2654	81.1243	1174.33	190.433	84.0543	159.674	1881.87	437.198	0.495351	Infected	2	1
80.611	137.158	1248.52	312.373	79.0933	227.63	1697.09	526.161	0.511286	Infected	2	1
80.2391	112.274	1118.19	283.275	78.0367	248.612	1803.39	573.623	0.461888	Infected	2	1
85.9762	86.8808	1120.61	208.1	82.4843	174.157	1796.54	463.578	0.566235	Infected	2	1
76.3463	190.237	1413.92	382.496	75.3155	370.888	2606.33	895.593	0.61382	Infected	2	1
75.4281	145.244	1519.71	419.111	77.1216	290.487	2012.92	676.386	0.465427	Infected	2	1
79.8377	199.997	1553.28	404.996	76.3133	262.062	1484.78	517.426	0.534641	Infected	2	1
93.1838	35.5015	974.673	89.0859	89.832	82.6859	1443.48	220.213	0.493659	Infected	2	1
79.497	60.2564	1840.19	377.709	82.9744	402.378	2227.14	708.2	0.236479	Infected	2	1
90.8936	55.124	1003.21	127.557	87.9691	125.07	1602.95	299.58	0.542843	Infected	2	1
97.571	24.0178	973.94	43.5656	96.1033	27.4311	1430.74	80.7899	0.550287	Infected	2	1
77.5528	173.348	1248.69	357.845	80.0919	268.756	1788.89	562.407	0.562291	Infected	2	1
76.9268	184.898	1253.7	364.921	79.2908	279.905	1801.76	584.008	0.598279	Infected	2	1
80.6264	163.027	1606.99	363.604	75.4896	255.332	2296.71	756.927	0.529384	Infected	2	1
78.292	137.003	1321.85	342.146	77.2846	220.549	1825.81	577.596	0.485849	Infected	2	1
93.8618	42.9099	1018.23	95.3911	91.5964	71.1732	1539.86	188.01	0.528924	Infected	2	1
96.8803	20.7666	1080.89	45.1706	94.4007	26.9258	1910.94	133.815	0.591278	Infected	2	1
89.9169	52.7738	1017.4	134.601	86.7399	112.551	1709.18	313.5	0.550668	Infected	2	1
81.1375	126.012	1235.47	293.444	81.0319	219.772	1857.05	522.75	0.534446	Infected	2	1
79.2756	168.105	1404.12	364.126	77.3263	258.6	1795.53	594.809	0.537081	Infected	2	1
86.7885	66.8137	927.877	158.727	83.3523	193.858	1691.16	427.483	0.591384	Infected	2	1
87.0515	31.9467	1704.2	243.747	88.5393	117.323	1856.11	318.032	0.329797	Infected	2	1
83.5711	87.2446	1152.15	227.952	82.411	159.001	1787.78	435.524	0.494908	Infected	2	1
78.5239	77.2404	1089.38	237.265	73.9275	244.343	1988.44	701.1	0.473897	Infected	2	1
80.1954	150.035	1224.25	304.084	79.2263	267.349	1961.04	615.074	0.525911	Infected	2	1
78.3652	150.642	1297.35	333.843	77.5212	207.699	1542.21	502.38	0.49993	Infected	2	1
77.3379	171.381	1401.66	391.044	77.7635	229.354	1542.49	514.87	0.510303	Infected	2	1
84.1349	87.866	1055.46	220.242	80.4819	219.046	1812.38	525.181	0.548822	Infected	3	1
83.2663	100.976	1071.77	238.251	81.8349	167.997	1487.07	395.585	0.444073	Infected	3	1
86.1411	81.7501	1042.19	192.195	85.0737	148.069	1456.55	350.87	0.461478	Infected	3	1
86.6871	92.5796	1063.88	188.917	85.1437	164.779	1918.47	417.01	0.562906	Infected	3	1
82.6465	78.8945	1000.72	210.894	81.7054	178.717	1747.06	463.286	0.487787	Infected	3	1
82.8513	92.9548	1059.24	217.066	81.8231	192.599	1857.13	489.009	0.518389	Infected	3	1
77.5602	167.194	1000.15	303.64	79.774	260.964	1696.27	534.336	0.621173	Infected	3	1
89.7802	56.1912	1021.46	140.326	88.4206	92.9456	1331.16	246.15	0.421696	Infected	3	1
81.05	117.172	1189.28	277.926	80.5951	218.126	1794.79	520.399	0.525178	Infected	3	1
83.492	102.202	1099.21	236.705	82.4997	207.876	1569.62	440.21	0.502782	Infected	3	1
86.5119	83.4258	1212.29	212.323	85.1249	144.015	2033.53	436.485	0.558532	Infected	3	1
90.2446	44.4788	856.91	110.544	86.8372	111.03	1652.36	322.737	0.512986	Infected	3	1
88.9526	67.61	868.222	136.817	86.8638	149.613	1622.02	337.238	0.555698	Infected	3	1
95.7594	35.2804	983.317	61.7595	93.3199	52.0705	1975.55	179.338	0.596613	Infected	3	1
96.6251	22.3998	830.494	41.8415	94.9826	37.3531	1561.93	113.64	0.551948	Infected	3	1
82.0801	111.81	1141.3	255.945	80.291	210.147	1703.06	493.426	0.524443	Infected	3	1
81.4505	96.9384	1118.32	255.462	80.8529	175.806	1616.26	451.402	0.399775	Infected	3	1
83.4107	86.8398	1070.82	217.324	83.6227	197.037	1780.79	456.042	0.485082	Infected	3	1
89.2895	81.5044	1006.5	167.859	88.5816	142.851	1551.91	306.341	0.542236	Infected	3	1
79.6167	94.0588	1159.57	274.384	78.5508	203.276	1783.27	537.452	0.463359	Infected	3	1
79.482	111.717	1210.71	289.03	79.1815	199.565	1768.99	517.426	0.421184	Infected	3	1
84.183	62.6732	907.821	179.075	81.2004	162.131	1423.96	397.379	0.469308	Infected	3	1
84.6762	72.5171	983.726	190.669	83.4416	152.698	1630	394.469	0.472601	Infected	3	1
82.6781	103.053	1120.59	244.301	81.0469	195.076	1740.27	483.36	0.483729	Infected	3	1
92.2109	51.5032	1036.05	109.284	90.5868	93.2479	1776.49	244.861	0.546735	Infected	3	1
78.653	140.038	1303.46	334.932	80.4417	233.648	1881.75	548.686	0.527935	Infected	3	1
94.2253	32.0896	898.432	73.1936	90.7934	58.4879	1891.65	244.607	0.548783	Infected	3	1
89.1942	41.4984	958.242	121.055	87.5256	100.733	1782.83	311.937	0.441192	Infected	3	1
81.5448	97.4703	988.14	232.231	80.8822	186.851	1351.21	403.448	0.446912	Infected	3	1
86.9701	81.1236	951.009	184.147	81.7461	191.509	1400.93	403.596	0.54504	Infected	3	1
82.3848	81.8694	1017.39	220.488	80.6963	128.984	1377.37	369.511	0.377551	Infected	3	1
85.6013	70.7242	839.258	167.943	82.6161	166.515	1337.17	366.043	0.448124	Infected	3	1
82.1154	95.7487	1115.58	250.771	77.9629	230.002	1980.89	616.578	0.509364	Infected	3	1
86.2953	60.0839	929.686	163.067	84.6432	120.007	1335.08	308.469	0.40966	Infected	3	1
84.0402	89.1995	916.376	191.193	82.4062	148.669	1293.38	347.654	0.472906	Infected	3	1
80.2996	173.979	1277.93	338.701	81.6415	295.593	1844.69	562.09	0.570478	Infected	3	1
82.9397	96.66	932.883	214.427	82.9389	200.764	1505.93	416.616	0.508943	Infected	3	1
85.254	84.9697	1044.55	205.829	85.0735	147.176	1347	326.208	0.411446	Infected	3	1
92.7276	29.8759	852.347	79.9235	90.1898	60.9712	1641.41	226.774	0.466515	Infected	3	1
80.3271	117.231	1204.93	297.146	77.6609	240.255	1998.7	620.081	0.455056	Infected	3	1
82.6494	124.482	1155.38	278.588	82.8735	183.244	1483.56	397.287	0.456412	Infected	3	1
81.7602	101.915	1086.43	252.866	79.9538	243.303	1481.64	473.657	0.488304	Infected	3	1
80.2974	114.248	1129.13	279.427	78.613	234.144	2014.81	602.455	0.453216	Infected	3	1
84.8832	77.651	891.89	184.861	84.216	141.467	1338.22	327.852	0.411966	Infected	3	1
86.1008	56.3749	936.741	160.247	83.628	128.981	1405.2	332.538	0.331261	Infected	3	1
93.3427	48.6524	1070.73	111.34	92.7035	80.114	1234.44	177.565	0.401739	Infected	3	1
82.9753	89.1048	965.317	218.036	81.8947	164.118	1430.38	401.416	0.476209	Infected	3	1
86.6596	89.6683	1149.8	214.723	84.5518	141.041	1550.15	398.994	0.513011	Infected	3	1
79.8315	155.552	1173.75	321.154	76.8628	254.082	1614.95	564.863	0.581583	Infected	3	1
98.4802	20.0239	1237.06	34.496	96.4852	21.7631	2101.68	99.148	0.600305	Infected	3	1
78.8451	168.918	1189.21	334.729	80.7401	285.858	1603.97	530.341	0.581938	Infected	3	1
91.063	53.6376	984.42	126.809	88.7088	119.406	1686.19	300.342	0.476007	Infected	3	1
81.0433	122.842	1122.55	272.586	81.0109	209.022	1606.22	468.459	0.508963	Infected	3	1
86.0916	78.9491	1147.89	208.004	82.3189	169.45	1737.59	442.896	0.528364	Infected	3	1
82.4669	109.06	1149.18	259.104	81.2682	205.229	1591.16	464.761	0.491953	Infected	3	1
84.147	94.386	1045.26	219.192	83.7051	157.145	1405.79	361.179	0.456453	Infected	3	1
95.8728	29.6546	983.267	57.6855	93.9952	54.894	1758.38	154.57	0.553226	Infected	3	1
81.5956	148.335	1327.72	313.596	79.7015	266.089	1742.62	548.49	0.501702	Infected	3	1
85.2886	89.4799	1168.21	229.964	81.4523	175.836	1651.08	447.889	0.419013	Infected	3	1
93.4281	38.9683	971.846	88.9428	90.6297	77.3243	1755.29	239.482	0.51384	Infected	3	1
86.6765	68.0486	1070.22	185.166	85.113	126.191	1701.47	364.53	0.442607	Infected	3	1
82.5294	88.2803	1107.56	233.127	80.2928	178.439	1633.23	458.159	0.39282	Infected	3	1
86.4479	80.3298	1059.12	198.009	84.5341	161.915	1472.9	364.542	0.382694	Infected	3	1
84.8998	99.6731	1082.21	221.385	83.5852	173.914	1388.09	368.907	0.45492	Infected	3	1
84.2735	108.061	1168.17	245.366	82.5466	210.615	1707.5	475.645	0.50611	Infected	3	1
81.7873	123.204	1409.56	314.889	79.9111	208.368	1770.48	507.851	0.413869	Infected	3	1
82.786	114.786	1187.58	268.743	81.3802	212.587	1646.93	462.711	0.462752	Infected	3	1
82.3486	118.574	1226.98	274.845	80.769	205.197	1703.07	478.567	0.445189	Infected	3	1
83.9858	86.5855	1073.92	220.314	82.9067	164.171	1733	430.349	0.405713	Infected	3	1
80.9881	137.467	1281.54	324.106	80.8876	216.064	1617.08	463.531	0.427117	Infected	3	1
85.971	76.151	892.014	171.324	83.4984	148.891	1307.24	324.647	0.4222	Infected	3	1
88.462	52.8285	844.33	136.959	91.3656	68.8552	1142.33	160.764	0.29372	Infected	3	1
81.5616	105.508	1084.87	260.531	80.9457	209.619	1580.22	455.721	0.379974	Infected	3	1
75.1918	211.023	1384.28	408.183	76.4137	304.069	2461.16	787.711	0.5967	Infected	3	1
87.0259	85.4026	1005.88	191.629	78.2301	204.061	2067.37	611.208	0.492446	Infected	3	1
82.7544	104.368	1116.04	244.847	83.5524	191.847	1602.51	429.048	0.511765	Infected	3	1
80.6163	112.176	1198.52	270.721	81.2729	206.527	1848	525.498	0.465342	Infected	3	1
81.8238	75.3172	1027.34	205.464	77.6085	149.864	1588.64	475.85	0.462753	Infected	3	1
81.1308	123.195	1111.74	284.683	79.6095	242.535	1663.31	522.796	0.52665	Infected	3	1
89.7905	69.2053	1128.31	161.366	82.1951	213.506	2539.08	628.797	0.491601	Infected	3	1
80.7786	161.068	1422.7	349.571	77.4857	251.596	1794.23	598.654	0.569732	Infected	3	1
77.5159	185.1	1310.28	388.412	81.6063	280.321	1772.34	540.923	0.552798	Infected	3	1
77.5806	197.591	1517.73	406.051	80.3883	299.356	1991.62	623.329	0.555884	Infected	3	1
83.4211	75.2262	912.508	197.705	79.8361	150.603	1194.92	364.101	0.437365	Infected	3	1
77.9561	133.432	1305.96	336.861	78.7609	230.348	1814.86	560.01	0.510039	Infected	3	1
80.7513	82.072	1060.42	232.431	76.982	177.678	1548.04	496.899	0.461996	Infected	3	1
98.9118	20.0122	1160.88	29.086	97.8776	20.0858	1919.34	61.165	0.570611	Infected	3	1
91.9599	47.4175	739.289	94.4357	87.8568	106.161	1614.85	295.298	0.409216	Infected	3	1
80.7269	94.6163	1041.37	248.672	80.2437	199.08	1499.35	449.831	0.451796	Infected	3	1
98.7731	20.0592	1053.98	28.7008	97.729	20.5543	1927.49	65.2188	0.551157	Infected	3	1
84.3781	87.6106	1026.38	212.412	81.0211	185.843	1668.35	461.302	0.49466	Infected	3	1
85.8958	79.9869	1124.47	206.209	83.8649	143.607	1516.17	367.445	0.461566	Infected	3	1
87.4299	77.0029	1004.75	176.244	86.119	133.174	1307.55	298.788	0.458744	Infected	3	1
83.645	70.1187	985.076	197.88	82.7025	138.818	1407.53	355.54	0.365464	Infected	3	1
81.8316	97.2673	1107.98	249.458	78.8952	200.545	1574.79	476.545	0.482788	Infected	3	1
87.7721	55.0674	937.372	147.707	82.5026	163.402	2092.17	496.073	0.480478	Infected	3	1
82.8977	92.4473	1028.68	227.946	82.723	170.914	1431.43	376.648	0.363846	Infected	3	1
81.9724	126.453	1112.01	272.206	82.1672	206.899	1459.87	421.314	0.453315	Infected	3	1
79.902	113.895	1063.87	264.123	82.9724	181.738	1502.06	390.345	0.378331	Infected	3	1
81.97	130.455	1175.93	276.531	81.633	204.404	1700.1	455.446	0.438728	Infected	3	1
74.5897	139.365	1419.99	413.159	77.8776	267.107	1682.33	566.901	0.359314	Infected	4	1
78.7186	174.631	1404.33	364.932	81.2843	408.586	3235.87	786.589	0.322084	Infected	4	1
78.7246	140.465	1257.64	328.633	78.8328	194.452	1374.38	436.131	0.39915	Infected	4	1
77.8526	157.414	1288.43	353.329	78.6564	253.779	1706.56	550.06	0.473522	Infected	4	1
78.4893	174.471	1300.99	346.183	79.495	266.641	1787.85	556.722	0.528208	Infected	4	1
76.293	178.73	1250.17	364.618	80.3091	253.05	1513.1	487.429	0.524517	Infected	4	1
79.5571	160.811	1296.91	340.067	80.0751	242.709	1562.81	487.51	0.474455	Infected	4	1
79.9241	156.942	1299.37	334.57	81.2329	241.983	1687.67	494.747	0.479041	Infected	4	1
77.2162	154.754	1430.53	401.927	76.2989	235.075	1869.95	607.741	0.392588	Infected	4	1
75.4105	196.826	1681.57	472.766	80.3474	306.513	1885.97	592.055	0.49932	Infected	4	1
78.9993	151.338	1218.05	322.434	78.9915	222.024	1510.66	476.005	0.461071	Infected	4	1
78.0198	214.79	1554.86	416.449	80.6647	321.577	2205.73	631.8	0.53717	Infected	4	1
76.1688	178.606	1348.03	381.37	80.2136	266.749	1703.38	538.605	0.519499	Infected	4	1
75.4812	186.211	1553.57	422.857	75.9448	417.015	2368.45	871.851	0.602822	Infected	4	1
76.6642	190.618	1383.48	392.948	78.7448	267.235	1559.86	527.248	0.531784	Infected	4	1
76.9402	145.499	1477.6	341.874	75.8535	426.061	2573.59	928.595	0.589814	Infected	4	1
78.8467	145.011	1281.09	328.114	79.2645	253.512	1674.78	529.539	0.501447	Infected	4	1
74.3322	153.403	1572.81	432.138	78.1954	309.677	2094.94	694.48	0.43029	Infected	4	1
86.7324	84.9573	975.975	181.031	83.4125	156.295	1677.96	405.55	0.590447	Infected	4	1
78.3323	147.745	1129.81	300.974	79.4221	235.961	1762.28	535.182	0.553766	Infected	4	1
84.7484	129.691	1187.98	269.09	81.6994	229.952	1714.67	497.907	0.50875	Infected	4	1
93.2377	24.8057	887.73	69.0518	85.3978	80.1865	1925.16	345.673	0.617457	Infected	4	1
78.1957	185.344	1314.62	352.544	78.9601	282.431	1885.19	602.612	0.595619	Infected	4	1
95.4246	42.8587	776.597	71.6387	93.8075	58.2328	1260.8	134.841	0.399367	Infected	4	1
87.8041	86.454	1077.1	188.329	84.7709	152.415	1659.26	371.642	0.561449	Infected	4	1
78.3052	175.347	1280.52	351.796	81.0115	271.915	1775.76	550.665	0.577283	Infected	4	1
84.2843	76.9023	1096.13	208.158	82.7594	140.643	1731.27	405.488	0.437599	Infected	4	1
93.9824	41.1095	1182.35	93.1446	89.2794	66.5127	2320.13	311.31	0.614286	Infected	4	1
76.914	169.706	1200	348.728	80.2294	264.488	1667.84	536.36	0.567268	Infected	4	1
78.9866	109.365	1110.87	283.893	79.2767	184.517	1519.97	455.663	0.470196	Infected	4	1
83.0092	129.014	1018.32	245.748	81.3662	173.763	1509.07	398.862	0.611746	Infected	4	1
78.1767	170.804	1332.3	360.697	77.1659	261.938	1769.9	597.863	0.55854	Infected	4	1
79.0275	132.089	1183.74	304.711	78.9841	183.539	1552.7	465.486	0.505856	Infected	4	1
84.3167	125.931	1385.62	278.394	79.9252	364.239	2832.19	831.226	0.456547	Infected	4	1
77.4237	208.256	1533	420.248	77.8604	301.695	1938.35	646.156	0.609932	Infected	4	1
79.6725	96.8005	1085.18	268.697	80.0891	186.973	1499.78	439.243	0.40045	Infected	4	1
78.3999	182.92	1529.09	410.398	77.4688	228.987	1748.01	561.515	0.510032	Infected	4	1
86.7646	72.5955	1035.16	184.19	83.657	139.6	1728.67	393.783	0.511092	Infected	4	1
89.5705	46.4678	1035.78	121.818	83.3521	130.409	1639.76	378.371	0.508025	Infected	4	1
88.1518	77.5968	1027.45	172.902	85.4599	141.247	1678.12	354.807	0.534565	Infected	4	1
79.5322	132.579	1244.38	304.472	82.7434	178.512	1873.15	466.393	0.507162	Infected	4	1
82.979	86.1292	1152.43	240.581	82.8746	221.809	1846.6	483.468	0.518507	Infected	4	1
83.4403	86.2598	1089.59	232.34	81.1529	173.032	1606.89	435.264	0.496088	Infected	4	1
80.8479	137.477	1265.76	318.117	80.7804	242.953	1529.29	473.775	0.564125	Infected	4	1
81.915	104.261	1117.93	261.469	80.9009	177.551	1420.74	407.322	0.421911	Infected	4	1
83.4953	122.529	1201.32	270.04	80.8785	202.244	1610.74	463.697	0.504933	Infected	4	1
93.5796	29.2121	837.645	74.0362	89.1052	67.8396	1545.65	227.49	0.552793	Infected	4	1
80.3533	138.359	1287.14	331.69	79.4553	228.179	1509.96	482.584	0.49594	Infected	4	1
86.8349	71.2909	952.001	164.8	83.5699	135.182	1919.91	419.423	0.558192	Infected	4	1
90.7443	41.9905	958.017	116.162	86.3825	85.177	1713.3	297.811	0.527734	Infected	4	1
88.3289	42.1925	1043.01	136.299	85.1394	74.2516	1629.01	313.693	0.524223	Infected	4	1
87.356	63.9748	1032.97	170.621	84.2985	118.839	1613.13	346.335	0.515683	Infected	4	1
77.5023	95.8291	1075.86	272.403	76.3822	213.58	1673.89	554.842	0.51147	Infected	4	1
75.7356	99.4471	1233.59	315.99	70.239	180.321	1806.17	666.15	0.497914	Infected	4	1
86.2373	77.5608	958.122	183.275	82.7837	154.606	1452.77	378.555	0.398452	Infected	4	1
73.5098	135.33	1333.94	388.398	78.5395	245.491	1903.89	592.843	0.485246	Infected	4	1
73.2405	156.722	1226.41	388.922	75.7852	229.612	1542.71	543.1	0.526355	Infected	4	1
78.11	150.236	1185.95	323.235	79.5825	246.344	1646.07	520.162	0.520107	Infected	4	1
76.6556	178.428	1418.11	408.245	77.3021	287.926	1976.86	659.982	0.507891	Infected	4	1
78.4077	169.301	1343.07	355.983	78.5582	250.245	1742.02	559.332	0.545336	Infected	4	1
76.4636	149.956	1261.65	354.371	79.2901	258.997	1794.49	564.755	0.514796	Infected	4	1
79.7062	194.076	1163.37	339.638	79.5054	258.326	1386.03	477.103	0.612432	Infected	4	1
78.816	106.355	1263.66	307.618	77.8806	186.029	1764.65	531.031	0.428291	Infected	4	1
77.3038	154.761	1043.64	296.149	79.7642	299.456	1850.64	608.918	0.569777	Infected	4	1
77.9926	194.808	1399.31	389.691	77.0316	272.744	1866.08	625.213	0.642936	Infected	4	1
80.4487	177.721	1578.91	383.688	77.8931	253.647	2046.96	629.152	0.57781	Infected	4	1
68.4922	154.862	1573.9	547.136	76.5093	314.934	1834.71	656.56	0.289201	Infected	4	1
79.4433	163.732	1465.54	400.576	80.1645	231.619	1627.48	490.428	0.38601	Infected	4	1
78.4273	100.804	1008.96	258.88	78.3951	206.185	1449.78	464.841	0.404079	Infected	4	1
78.6333	138.101	1403.86	372.423	80.4342	167.181	1593.94	431.053	0.39038	Infected	4	1
81.4578	113.273	1062.02	256.548	81.2249	213.059	1560.68	449.753	0.44525	Infected	4	1
78.3129	119.091	1284.84	328.001	77.2964	266.194	1918.98	630.088	0.373293	Infected	4	1
80.5815	108.926	1135.22	274.6	80.4022	181.225	1450.57	420.223	0.407332	Infected	4	1
77.2805	173.396	1500.86	412.406	78.9334	207.977	1801.99	528.959	0.474355	Infected	4	1
78.2987	132.799	1184.82	318.15	80.6759	222.111	1627.42	481.662	0.47156	Infected	4	1
75.0265	225.325	1630.77	473.13	80.3791	284.197	1939.97	608.61	0.511436	Infected	4	1
76.7081	169.34	1319.96	369.237	78.9765	259.411	1670.29	540.866	0.51158	Infected	4	1
79.0812	140.433	1213.39	319.591	78.5535	241.791	1604.56	519.992	0.531739	Infected	4	1
87.9046	56.6309	1018.61	139.914	85.615	145.604	1882.8	384.465	0.578831	Infected	4	1
77.6762	161.848	1101.24	321.255	78.6598	273.548	1644.25	553.296	0.602872	Infected	4	1
88.506	66.7562	926.459	148.566	85.6269	128.195	1598.31	328.193	0.569642	Infected	4	1
95.7783	21.7159	648.708	43.5313	92.9672	43.7932	1611.57	152.282	0.574259	Infected	4	1
83.4647	98.1838	1095.3	234.197	80.02	173.732	1675.87	470.307	0.53203	Infected	4	1
79.0633	135.592	1352.88	354.329	77.1689	203.492	1850.61	574.251	0.458419	Infected	4	1
83.2104	60.4901	1033.07	204.699	81.5716	145.265	1672.36	424.649	0.438576	Infected	4	1
84.473	72.1145	881.391	181.291	79.7566	157.364	1472.39	418.444	0.533594	Infected	4	1
94.063	31.3479	577.171	58.0959	92.5614	58.0802	1205.66	141.539	0.416625	Infected	4	1
77.2816	143.076	1318.78	360.466	78.6255	212.106	1640.4	512.324	0.461557	Infected	4	1
79.4292	84.4466	1032.92	247.781	77.6149	160.132	1361.97	427.061	0.398972	Infected	4	1
85.5721	51.4751	768.037	136.051	81.0524	195.409	1719.15	478.616	0.574003	Infected	4	1
85.0766	66.787	1025.49	187.713	83.1393	129.424	1675.16	383.576	0.446647	Infected	4	1
79.2106	106.998	1160.28	289.052	80.3104	157.774	1534.22	423.697	0.439449	Infected	4	1
77.173	150.735	1371.63	380.133	75.4681	202.172	1488.88	507.123	0.509733	Infected	4	1
79.6142	129.442	1295.27	329.648	78.8143	208.395	1586.96	496.592	0.501668	Infected	4	1
81.2722	76.7402	987.939	215.537	77.6598	228.673	1523.78	512.819	0.498731	Infected	4	1
75.6498	128.633	1307.52	354.388	70.5129	187.667	1709.25	636.722	0.506632	Infected	4	1
79.6644	114.199	1220.52	308.072	78.7195	160.474	1426.53	422.624	0.377042	Infected	4	1
74.5199	147.066	1401.03	392.144	76.5803	412.574	2419.01	866.887	0.39401	Infected	4	1
81.6051	104.214	1146.79	269.808	79.6311	178.696	1472.65	438.272	0.462475	Infected	4	1
84.6555	97.3407	1020.16	214.636	82.9444	185.633	1530.87	408.334	0.533841	Infected	4	1
80.5193	88.6791	1099.53	249.25	78.7595	176.37	1411.62	436.686	0.415041	Infected	4	1
87.9797	40.6207	999.982	138.193	80.7151	94.788	1633.69	385.404	0.49346	Infected	4	1
75.303	110.86	1207.03	330.742	72.7649	176.103	1567.57	548.553	0.364136	Infected	4	1
81.4117	141.004	1275.59	303.692	80.198	220.198	1779.5	519.281	0.52846	Infected	4	1
95.6412	21.3682	944.03	51.2589	90.6717	48.1432	1750.41	211.962	0.589973	Infected	4	1
84.1793	82.0991	1079.03	221.274	80.4839	157.361	1441.28	404.649	0.36464	Infected	4	1
77.1269	213.829	1742.42	476.849	76.5434	311.203	2079.63	710.649	0.575938	Infected	4	1
78.5965	162.38	1182.41	336.002	78.091	249.868	1729.26	556.669	0.57007	Infected	4	1
80.0197	105.732	1381.04	307.803	81.2302	148.657	1744.26	445.462	0.46976	Infected	4	1
75.3053	113.886	1275.59	336.448	78.5906	226.361	2188.6	635.697	0.472467	Infected	4	1
76.9471	112.15	1242.94	317.728	76.9832	189.235	1637.94	515.804	0.427848	Infected	4	1
80.4497	149	1273.54	326.024	79.6837	227.923	1554.22	488.647	0.509855	Infected	4	1
74.4983	143.485	1289.29	368.894	73.7646	212.342	1685.68	594.404	0.505323	Infected	4	1
79.9945	186.051	1187.22	351.671	79.8727	274.418	1589.43	517.335	0.628123	Infected	4	1
80.7979	161.216	1216.68	319.511	79.097	233.889	1396.67	466.112	0.522583	Infected	4	1
77.8953	179.097	1247.88	365.283	80.7701	271.156	1657.45	520.888	0.570291	Infected	4	1
72.8198	225.249	2086.25	585.571	65.8534	469.955	2924.43	1310.45	0.648644	Control	1	1	18
78.4403	227.316	1431.3	410.382	76.701	291.748	2175.16	723.956	0.657957	Control	1	1
78.9117	198.546	1560.15	407.702	76.9818	287.36	2127.81	701.261	0.654021	Control	1	1
76.4295	258.344	1666.05	469.493	75.1434	293.301	2100.45	729.92	0.657452	Control	1	1
79.0131	183.19	1735.37	435.293	73.0625	312.277	2476.5	894.039	0.640221	Control	1	1
74.7411	243.742	1896.84	525.012	70.4014	384.005	2649.35	1060.51	0.680333	Control	1	1
77.7176	181.947	1693.68	432.351	72.0211	320.963	2610.38	963.79	0.620259	Control	2	1
82.2041	189.325	1234.63	328.008	76.089	277.868	2147.48	552.145	0.611152	Control	2	1
79.417	203.98	1408.68	387.689	76.7327	292.16	2368.15	668.605	0.619666	Control	2	1
77.3023	179.769	1318.26	369.882	77.0774	246.421	2032.04	655.307	0.5928	Control	2	1
78.8079	191.957	1300.23	362.966	79.5637	260.726	1876	581.214	0.629	Control	2	1
78.9774	200.628	1290.82	369.485	78.6442	255.873	1733.62	557.398	0.622176	Control	3	1
78.376	205.257	1522.63	409.453	77.6622	286.797	2079.93	683.458	0.600221	Control	4	1
78.7333	195.964	1270.38	357.532	78.9601	262.087	1833.67	572.388	0.622649	Control	4	1
78.2737	219.075	1623.64	440.933	76.6938	362.444	2424.34	833.186	0.609159	Control	4	1
77.5363	208.171	1384.79	397.213	77.8131	270.111	2136	629.395	0.595874	Control	4	1
78.5845	195.189	1476.87	395.071	75.7207	308.887	2207.67	739.715	0.617578	Control	5	1
78.0653	228.335	1676.26	456.725	76.9721	309.987	2314.77	758.302	0.632402	Control	5	1
84.2354	284.318	1914.82	500.371	82.2082	200.729	2391.29	597.923	0.748787	Infected	1	2	130
68.9035	519.56	2060.91	873.424	79.041	365.64	2586.31	827.668	0.713697	Infected	1	2
90.8221	245.382	1685.11	368.579	83.9326	212.193	2294.11	552.559	0.534451	Infected	1	2
73.6276	523.271	2367.27	920.733	76.875	338.485	2491.01	833.903	0.68268	Infected	1	2
88.923	242.176	1918.27	411.827	80.7181	256.773	2626.97	707.704	0.540635	Infected	1	2
76.8738	477.323	1756.22	685.22	82.2478	306.412	2384.77	668.314	0.699681	Infected	1	2
78.2621	415.002	2086.29	699.241	78.4054	279.181	2273.68	712.501	0.64931	Infected	1	2
72.8189	510.876	1944.99	789.536	81.5701	352.195	2538.32	752.301	0.764483	Infected	1	2
70.6208	482.295	1920.67	818.41	78.9569	309.087	2420.7	749.607	0.690454	Infected	1	2
70.2454	501.444	2114.39	900.458	76.4593	296.08	2460.74	805.174	0.667308	Infected	1	2
74.4275	569.767	2414.49	923.017	75.5891	314.908	2420.75	823.601	0.746021	Infected	1	2
68.1189	621.925	2442.4	1049.48	71.7398	323.482	2690.36	986.314	0.735678	Infected	1	2
79.363	431.599	2080.3	736.984	80.8771	277.552	2351.21	677.912	0.65179	Infected	1	2
72.1422	578.037	2063.45	879.677	79.624	326.409	2463.34	758.329	0.703089	Infected	1	2
71.9147	497.871	2224.69	889.58	74.8369	313.517	2632.99	891.322	0.731897	Infected	1	2
75.532	410.995	1828.88	713.081	80.791	516.669	4001.63	1029.94	0.985539	Infected	1	2
72.4728	530.646	2124.77	869.391	77.8786	312.667	2444.82	778.988	0.78282	Infected	1	2
74.0164	492.838	1872.1	775.031	78.7246	244.56	2279.76	673.629	0.69074	Infected	1	2
73.924	506.544	1840.55	790.579	81.0646	289.429	2278.38	661.663	0.617842	Infected	1	2
76.7246	435.757	1722.99	649.5	85.539	326.036	2453.79	631.999	0.682614	Infected	1	2
69.434	460.702	2340.68	910.755	76.474	351.721	2930.3	943.991	0.723275	Infected	1	2
77.8864	258.085	1895.93	568.525	74.1731	336.974	2758.26	949.289	0.650311	Infected	1	2
78.847	263.335	1729.55	533.913	78.8413	324.553	2470.6	774.107	0.777003	Infected	1	2
78.953	265.925	1931.62	558.989	72.414	361.851	2863.32	1040.01	0.733476	Infected	1	2
77.61	275.519	1822.78	577.986	78.4642	358.945	2583.57	833.017	0.77447	Infected	1	2
75.5544	268.194	1905.02	621.967	75.2348	335.044	2557.1	878.338	0.726124	Infected	1	2
79.0974	234.421	2251.77	604.226	72.8534	326.436	2656.8	955.848	0.696248	Infected	1	2
79.2723	225.678	1460.1	441.528	81.5895	316.593	2376.47	693.139	0.670324	Infected	1	2
74.7706	239.991	1749.04	579.198	73.0456	351.871	2543.69	939.117	0.714883	Infected	1	2
78.9591	266.066	1801.92	544.317	77.6735	369.457	2709.54	887.974	0.714682	Infected	1	2
74.1227	230.141	1908.19	614.514	73.9595	321.827	2531.75	893.349	0.748732	Infected	1	2
73.8962	222.872	1628.15	539.174	75.1942	326.855	2429.01	844.411	0.674515	Infected	1	2
77.037	225.763	2081.98	604.927	76.0507	331.744	2663.24	893.008	0.736023	Infected	1	2
79.1723	244.172	1536.45	467.473	82.9963	350.682	2511.95	714.988	0.672052	Infected	1	2
79.8827	173.049	1516.88	418.592	74.8383	232.954	2238.33	739.797	0.743066	Infected	1	2
78.1248	229.489	1570.19	456.903	74.7865	351.34	2571.38	896.515	0.728877	Infected	1	2
72.773	337.986	2172.2	743.222	70.8585	699.16	3586.77	1495	0.728956	Infected	1	2
79.1871	330.236	1805.05	582.335	80.0581	565.084	3116.76	1055.88	0.750766	Infected	1	2
73.5398	319.177	2138.76	729.615	69.6947	721.189	3675.26	1541.46	0.764108	Infected	1	2
72.8236	353.414	2015.49	718.922	77.2441	683.315	4185.69	1394.86	0.749574	Infected	1	2
72.6972	319.206	2185.43	768.348	70.4528	653.237	3348.21	1395.37	0.766318	Infected	1	2
77.9315	353.789	2091.59	633.64	76.5929	772.299	3516.02	1392.18	0.737107	Infected	1	2
75.2233	322.272	1973.75	668.171	73.0307	658.33	3434.51	1358.14	0.88106	Infected	1	2
75.477	336.228	2140.8	704.933	75.1717	691.901	3739.42	1359.29	0.770507	Infected	1	2
73.4979	342.72	2158.42	742.228	70.3813	660.989	3589.54	1431.05	0.759472	Infected	1	2
73.1569	299.451	1929.57	676.361	71.9206	617.046	3143.57	1305.85	0.75409	Infected	1	2
71.8645	312.012	2191.28	762.706	68.9309	788.923	4067.15	1649.67	0.753324	Infected	1	2
71.0004	341.421	2180.6	784.026	69.4028	787.927	3764.55	1545.18	0.761508	Infected	1	2
65.1387	370.914	2304.95	913.34	65.8399	922.675	5677.35	1875.84	0.772872	Infected	1	2
77.2819	335.103	2039.9	661.54	73.1527	610.383	3377.39	1310.54	0.76008	Infected	1	2
77.3299	390.276	2141.61	727.103	81.5034	868.38	4424.55	1442.83	0.787499	Infected	1	2
77.6788	414.916	2053.97	703.509	80.865	861.963	4395.55	1439.23	0.76074	Infected	1	2
77.3827	381.282	1961.95	677.908	79.368	813.947	4345.35	1431.15	0.787184	Infected	1	2
72.089	371.508	2294.89	826.349	75.0103	331.423	2658.32	905.116	0.728632	Infected	2	2
77.4026	320.238	1989.71	639.681	77.5924	282.739	2505.68	792.733	0.679055	Infected	2	2
74.302	355.635	1843.3	687.734	79.9824	284.928	2385.01	710.337	0.719754	Infected	2	2
76.2507	358.243	1964.59	681.525	80.1077	293.423	2493.87	732.142	0.728264	Infected	2	2
74.1412	316.665	1914.09	678.697	77.5581	269.814	2386.38	746.671	0.690101	Infected	2	2
75.5418	331.257	1977.92	678.367	76.1472	272.343	2530.86	827.874	0.705386	Infected	2	2
79.6677	328.016	6252.43	1055.22	82.324	308.439	2570.76	710.307	0.760541	Infected	2	2
77.4206	296.57	1803	594.353	79.3443	284.545	2597.39	774.779	0.72928	Infected	2	2
76.4172	343.418	1954.45	664.152	74.477	309.316	2682.05	910.898	0.756508	Infected	2	2
76.0122	301.982	1932.01	635.825	78.4164	287.647	2428.61	747.422	0.692175	Infected	2	2
80.2095	429	2050.44	629.321	80.3029	435.244	3584.89	1033.29	0.972019	Infected	2	2
74.8659	252.488	1857.24	607.933	77.4663	295.209	2709.48	830.679	0.698786	Infected	2	2
77.8214	221.609	1690.05	500.683	76.6797	366.074	2808.7	916.087	0.765725	Infected	2	2
87.6633	110.531	1364	256.096	86.664	153.973	2281.14	428.044	0.708636	Infected	2	2
81.7447	128.245	1317.17	343.327	82.8993	162.243	2124.46	495.909	0.675709	Infected	2	2
79.0695	193.413	1498.62	430.839	79.4205	247.774	2352.66	679.295	0.722412	Infected	2	2
78.9284	228.443	1615.57	482.172	76.7735	267.836	2514.55	788.87	0.730419	Infected	2	2
77.4824	169.465	1467.98	443.484	77.6904	193.974	2343.83	678.674	0.657122	Infected	2	2
74.928	578.234	1807.01	769.407	83.9094	203.665	2441.34	558.307	0.799887	Infected	3	2
66.7671	844.799	2480.39	1160.42	78.2192	221.294	2518.56	720.257	0.778959	Infected	3	2
73.3735	570.694	1503.25	723.465	86.5316	168.344	2012.42	411.657	0.68882	Infected	3	2
71.9788	690.808	2221.8	947.729	83.246	170.642	2285	532.119	0.761163	Infected	3	2
72.2947	640.17	1787.04	813.723	83.9794	186.135	2182.02	509.375	0.782855	Infected	3	2
70.4685	791.086	2321.24	1033.26	81.515	188.025	2225.57	573.268	0.786688	Infected	3	2
71.3979	763.245	2555.64	1080.04	83.1755	202.29	2127.93	530.247	0.768601	Infected	3	2
68.9675	720.021	1946.55	931.241	83.9312	181.155	2106.05	496.35	0.780952	Infected	3	2
71.8706	676.137	1925.51	886.056	83.8123	178.341	2188.27	514.051	0.744602	Infected	3	2
67.2876	856.722	2711.55	1219.18	79.5682	181.456	2420.79	644.1	0.769958	Infected	3	2
76.7039	581.721	1531.36	721.553	88.3495	132.969	1889.26	341.852	0.668045	Infected	3	2
77.3308	512.309	1587.93	654.685	82.5588	396.676	2651.37	783.772	0.8107	Infected	3	2
77.9988	508.666	1647.08	665.928	82.8007	399.001	2627.79	776.544	0.772704	Infected	3	2
78.674	455.785	1493.29	595.241	83.3906	378.899	2575	735.144	0.784305	Infected	3	2
76.2435	503.744	1635.64	669.434	82.1434	386.54	2562.91	767.312	0.756146	Infected	3	2
76.4456	502.312	1443.06	629.42	83.7901	394.092	2518.16	733.791	0.779129	Infected	3	2
76.6527	529.361	1877.64	746.895	79.4406	413.571	2787.42	889.061	0.78662	Infected	3	2
88.0664	100.065	1125.49	215.388	83.3063	219.52	2280.95	562.108	0.760475	Infected	3	2
86.5608	95.5888	1297.79	259.14	81.4092	228.576	2318.45	619.98	0.757398	Infected	3	2
87.5919	81.9999	998.93	185.079	83.0471	206.682	2258.14	560.752	0.72843	Infected	3	2
85.2998	103.218	1562.8	326.235	72.3795	236.454	2461.39	854.599	0.734873	Infected	3	2
83.5161	113.364	1689.11	363.07	72.0392	249.888	2618.8	896.674	0.735886	Infected	3	2
87.2318	101.289	1209.11	233.375	80.9282	229.494	2429.17	650.082	0.786762	Infected	3	2
86.3122	112.583	1141.5	241.237	82.9856	228.715	2351.21	589.777	0.782884	Infected	3	2
86.3919	122.717	1203.32	258.706	82.939	245.948	2364.5	607.222	0.792852	Infected	3	2
79.3278	296.361	1987.52	594.488	78.9116	383.247	2756.7	886.52	0.763375	Infected	4	2
75.5278	214.033	1630.54	511.279	74.9964	315.232	2457.64	848.147	0.718486	Infected	4	2
78.1926	262.518	1757.4	538.77	79.0268	306.072	2314.91	724.852	0.760438	Infected	4	2
76.3202	231.953	2152.64	637.349	73.323	349.322	2896.03	1019.86	0.68693	Infected	4	2
79.9755	187.218	1346.31	384.662	80.5082	321.7	2348.81	721.475	0.712104	Infected	4	2
75.8138	223.834	1787.39	568.702	77.2163	272.937	2369	758.594	0.616423	Infected	4	2
76.3554	256.402	1935.76	608.028	75.1783	356.514	2639.79	936.34	0.718818	Infected	4	2
77.2892	220.767	1561.17	483.505	78.6193	283.661	2464.68	743.978	0.690127	Infected	4	2
76.0991	237.978	1695.66	556.906	79.711	334.809	2627.14	795.409	0.747122	Infected	4	2
78.9545	207.351	1351.52	415.741	82.6493	297.922	2379.14	645.023	0.671897	Infected	4	2
78.0775	242.32	1702.43	523.807	83.2986	332.798	2603.04	707.15	0.714411	Infected	4	2
74.4045	264.595	1880	615.241	75.1497	338.152	2600.11	903.81	0.720245	Infected	4	2
77.2559	249.817	1710.81	545.952	78.4986	321.578	2502.55	782.718	0.733205	Infected	4	2
77.7324	233.25	1575.57	488.553	80.98	309.23	2516.76	718.251	0.715888	Infected	4	2
73.265	234.336	2277.43	713.675	63.8974	412.04	2870.53	1281.41	0.721687	Infected	4	2
74.1007	282.361	2219.17	725.578	73.0194	345.963	3048.47	1049.57	0.746863	Infected	4	2
77.9721	228.662	1458.91	448.655	79.3835	353.274	2627.53	816.135	0.760095	Infected	4	2
75.2428	211.932	1634.9	526.343	77.7211	287.96	2368.67	749.819	0.664987	Infected	4	2
77.3504	233.832	1763.48	537.93	77.7167	306.376	2513.41	790.895	0.728328	Infected	4	2
74.0137	259.954	1876.83	629.642	73.4972	319.452	2529.68	903.203	0.720951	Infected	4	2
76.0764	216.22	1531.13	485.862	77.1881	281.148	2375.05	749.208	0.63313	Infected	4	2
77.4156	215.958	1634.06	501.674	78.8404	295.835	2510.66	766.989	0.648606	Infected	4	2
78.2322	228.558	1516.7	466.269	78.9927	324.391	2669.85	804.364	0.721555	Infected	4	2
78.4018	271.075	1723.73	537.383	78.7111	338.594	2396.83	779.952	0.734358	Infected	4	2
78.7385	247.887	1702.38	524.045	80.8523	321.331	2477.31	732.655	0.712737	Infected	4	2
73.1284	348.187	1832.42	693.888	78.3647	271.428	2357.59	717.622	0.610283	Infected	4	2
76.2784	216.03	1836.17	575.735	75.0268	222.454	2638.93	820.631	0.758023	Infected	4	2
76.4433	186.773	1663.9	498.876	81.0276	211.774	2359.55	613.805	0.64473	Infected	4	2
76.9735	196.786	1525	468.612	81.7183	220.185	2122.82	565.77	0.664585	Infected	4	2
75.9088	226.056	1725.29	547.197	78.75	250.02	2381.4	703.783	0.706168	Infected	4	2
77.2955	180.839	1388.8	429.978	82.9817	203.391	2101.3	526.717	0.599367	Infected	4	2
77.7775	181.834	1467.62	427.747	79.1879	206.181	2520.87	680.687	0.68178	Infected	4	2
76.1392	192.209	1575.48	495.419	81.6344	180.394	2165.35	544.289	0.617451	Infected	4	2
73.2286	169.767	1368.25	458.229	80.9882	188.453	2054.86	543.127	0.597125	Infected	4	2
89.1209	90.5235	1490.25	224.865	73.2648	590.999	3070.56	1225.46	0.769578	Control	1	2	29
90.2839	86.7904	1459.26	221.844	70.7424	583.58	3093.52	1296.65	0.769478	Control	1	2
81.5381	196.292	1661.92	436.236	85.1685	105.507	2194.55	416.695	0.753338	Control	1	2
77.9465	338.446	2000.75	647.462	74.2435	678.353	3230.25	1314.66	0.781216	Control	1	2
67.3835	420.785	2066.05	857.635	70.1039	770.15	3511.42	1538.7	0.779909	Control	1	2
79.2975	378.958	1901.65	609.282	78.2957	577.487	3102.35	1100.45	0.808153	Control	1	2
78.9116	242.421	1866.69	543.354	74.3321	421.711	2822.68	1022.96	0.76517	Control	2	2
82.2452	172.705	1680.52	413.655	74.1226	655.789	3544.96	1318.08	0.778265	Control	2	2
81.4973	165.148	1647.13	422.711	73.5657	650.727	3342.55	1325.73	0.764438	Control	2	2
85.4697	134.289	1385.62	320.105	80.1799	322.123	2578.98	752.431	0.822058	Control	2	2
84.8681	132.773	1414.66	315.775	78.1398	296.23	2507.9	774.169	0.774165	Control	2	2
73.4752	390.531	2076.04	752.187	72.2494	661.63	3612.1	1395.74	0.770804	Control	2	2
78.4306	190.747	1760.62	506.45	67.3116	458.362	2824.96	1207.29	0.74888	Control	2	2
76.3307	344.276	1962.35	659.986	76.6407	467.802	2913.18	1027.56	0.786912	Control	3	2
77.7344	251.393	1782.16	538.08	78.2654	1343.7	7167.69	2212.33	0.749088	Control	3	2
83.6972	161.513	1472.24	351.821	79.5807	844.253	4384.39	1497.94	0.769315	Control	3	2
69.8169	758.162	2052.92	996.685	78.7149	188.633	2512.4	691.567	0.709978	Control	3	2
87.1025	95.0748	897.134	176.382	85.6205	270.504	2320.49	536.016	0.719868	Control	4	2
77.579	251.119	1898.26	552.867	70.7884	431.524	2856.17	1122.31	0.77591	Control	4	2
80.4035	478.689	1693.87	633.718	82.3938	455.817	2774.23	856.438	0.700357	Control	4	2
76.8481	545.044	1779.17	736.232	76.9899	473.76	3003.14	1044.42	0.706456	Control	4	2
79.0877	183.984	1777.48	500.09	74.1	992.926	4871.66	1798.38	0.732361	Control	4	2
81.7546	198.91	1891.61	474.362	71.0502	339.562	2842.94	1053.23	0.749919	Control	4	2
77.8128	199.839	2224.87	615.803	64.146	384.46	2835.22	1239.6	0.750051	Control	4	2
77.4181	278.504	1916.98	586.523	71.1509	655.307	3337.36	1390.54	0.764929	Control	5	2
79.0814	368.501	1728.76	590.366	79.7191	563.048	3014.64	1041.84	0.79454	Control	5	2
93.0984	89.5995	1607.35	184.227	91.3214	93.6256	2595.52	328.217	0.736312	Control	5	2
82.1549	201.466	1456.4	395.341	82.6496	320.83	2685.97	722.792	0.753351	Control	5	2
73.879	514.029	1903.68	769.788	79.1478	1018.75	5496.83	1831.17	0.786646	Control	5	2
76.1686	315.003	1776.94	615.802	93.0052	44.7017	1956.33	181.97	0.646713	Infected	1	3	281
73.1503	369.39	3111.72	837.268	88.0047	105.44	2350.2	375.36	0.758235	Infected	1	3
74.1756	295.681	1909.02	655.347	91.3539	55.9362	2046.68	229.21	0.681314	Infected	1	3
77.677	343.78	1784.76	604.985	91.9156	59.9127	2002.36	222.163	0.748424	Infected	1	3
89.2814	100.015	1679.54	241.776	77.7659	250.855	2758.54	804.174	0.763285	Infected	1	3
93.3714	44.1866	1318.88	122.587	83.2007	153.064	2347.82	530.35	0.740751	Infected	1	3
92.3165	65.5859	1195.79	149.696	79.3	247.215	2508.72	714.186	0.719946	Infected	1	3
90.3537	89.2754	1493.82	221.459	75.9586	259.992	2717.89	853.914	0.743574	Infected	1	3
91.9925	53.7788	1065.14	128.351	76.5583	295.603	2467.6	802.373	0.75253	Infected	1	3
91.9804	54.4798	1430.57	163.162	72.8293	319.031	2527.67	922.016	0.7497	Infected	1	3
91.2391	73.0322	1548.78	216.822	72.6742	240.438	2504.43	856.45	0.725237	Infected	1	3
92.145	46.3567	1227.09	141.388	78.0508	239.864	2437.18	726.412	0.729603	Infected	1	3
91.4665	48.5776	1141.62	134.477	77.6329	231.051	2442.27	725.237	0.76482	Infected	1	3
88.5264	114.119	1562.76	276.92	78.4636	267.812	2698.08	787.338	0.771342	Infected	1	3
90.0987	84.1512	1531.8	197.728	74.3342	270.438	2655.07	874.343	0.785305	Infected	1	3
91.2531	48.2675	972.328	114.406	82.3375	248.037	2414.24	627.572	0.680646	Infected	1	3
94.3279	34.0822	1267.49	94.881	85.804	135.52	2440.68	468.678	0.677081	Infected	1	3
91.8788	56.7654	1373.7	155.793	80.3636	258.007	2418.77	677.492	0.719942	Infected	1	3
90.2953	40.8577	1285.24	152.699	75.074	244.363	2482.47	799.376	0.732291	Infected	1	3
90.119	97.2998	1628.08	255.106	74.0651	278.83	2686.09	893.835	0.669759	Infected	1	3
94.4862	29.7338	1101.56	82.6877	85.1432	122.254	2187.33	432.481	0.629419	Infected	1	3
78.3565	275.727	1619.02	504.636	76.6168	396.57	2792.31	935.029	0.767636	Infected	1	3
80.8595	208.914	1480.88	422.76	78.2468	337.539	2647.99	831.296	0.714213	Infected	1	3
83.937	146.365	1415.51	326.819	74.1711	305.33	2464.11	865.25	0.717769	Infected	1	3
79.8664	265.403	1670.69	491.864	77.1263	403.354	2865.08	955.444	0.789496	Infected	1	3
86.108	153.158	1611.82	344.528	76.8148	274.806	2835.68	858.152	0.78453	Infected	1	3
76.7919	200.185	1447.53	457.14	79.8717	335.966	2502.12	774.431	0.656283	Infected	1	3
90.0615	85.1584	1162.61	191.261	81.7863	181.58	2541.26	602.521	0.762889	Infected	1	3
77.764	240.691	1547.3	491.261	78.7166	369.564	2536.7	822.966	0.757252	Infected	1	3
80.4889	245.635	1571.96	462.085	80.3169	426.119	2620.41	853.352	0.768296	Infected	1	3
75.3262	307.498	2040.57	672.197	72.4029	399.529	2889.25	1091.6	0.760308	Infected	1	3
71.5454	279.912	2332.71	756.71	62.4194	432.355	2974.7	1369.98	0.759506	Infected	1	3
80.9583	273.82	1499.17	476.374	81.5096	365.117	2643.94	779.99	0.752524	Infected	1	3
78.5748	259.523	1608.16	460.13	73.858	378.961	3038.37	1054.24	0.79991	Infected	1	3
80.3224	250.95	1833.48	517.41	72.9352	379.962	3083.27	1098.17	0.805544	Infected	1	3
83.0807	130.565	1087.61	269.36	81.4534	239.929	2364.66	630.837	0.689893	Infected	1	3
80.648	203.312	1560.81	436.475	76.5609	352.414	2577.02	862.759	0.756628	Infected	1	3
79.4659	250.242	1568.44	481.947	79.7171	371.402	2546.53	806.796	0.755809	Infected	1	3
78.5009	263.189	1648.28	518	79.3768	380.219	2548.13	822.256	0.751809	Infected	1	3
85.1804	140.335	1134.56	276.198	83.0755	282.471	2401.13	633.33	0.723045	Infected	1	3
81.4173	213.87	1526.46	422.846	82.0404	342.384	2596.5	741.876	0.738415	Infected	1	3
82.6488	160.129	1368.83	355.976	79.7581	288.691	2417.12	711.797	0.709056	Infected	1	3
83.9802	124.365	1166.04	271.997	82.6353	261.821	2354.04	623.722	0.702648	Infected	1	3
79.2149	244.047	1785.74	518.079	77.5669	346.171	2505.36	819.924	0.673951	Infected	1	3
94.6786	57.6874	1271.51	126.816	86.4848	133.858	2429.7	446.272	0.721208	Infected	1	3
91.3276	65.3471	1171.54	143.064	82.8421	163.294	2551.33	567.35	0.750239	Infected	1	3
89.6058	89.5962	1145.09	194.6	79.3599	317.749	2597.13	778.267	0.688439	Infected	1	3
85.1729	134.248	1239	288.922	78.6353	309.345	2491.93	772.695	0.74527	Infected	1	3
86.1074	149.995	1272.99	292.342	82.2548	292.834	2341.65	649.729	0.694361	Infected	1	3
73.4425	329.674	1928	703.351	77.3632	260.414	2395.41	749.271	0.673169	Infected	1	3
73.0581	339.393	1888.03	701.16	79.224	239.746	2374.09	681.283	0.62684	Infected	1	3
74.3278	377.19	2227.26	770.631	75.4519	310.091	2652.24	879.658	0.719566	Infected	1	3
75.6457	352.697	1913.48	671.235	78.827	275.267	2406.98	719.394	0.684643	Infected	1	3
67.7135	376.807	2354	914.678	65.3586	326.166	2569.3	1097.88	0.771551	Infected	1	3
75.9688	380.678	1863.73	672.087	80.0045	280.818	2435.93	706.069	0.730548	Infected	1	3
72.3353	367.426	1900.14	729.798	76.4136	256.431	2372.76	749.18	0.70402	Infected	1	3
74.5644	403.304	2005.36	728.547	77.428	321.293	2606.7	837.822	0.766918	Infected	1	3
69.8383	446.114	2256.4	872.848	69.9395	318.777	2921.81	1095.35	0.771939	Infected	1	3
77.3957	325.028	1723.24	597.941	80.0152	246.461	2458.51	706.319	0.645999	Infected	1	3
75.211	430.358	1600.16	637.803	79.9742	320.747	2605.62	752.235	0.899137	Infected	2	3
76.1517	370.111	1884.98	683.647	79.693	220.38	2244.36	628.552	0.643952	Infected	2	3
89.2143	126.169	1385.04	191.208	88.7499	120.299	2384.25	393.631	0.535151	Infected	2	3
73.9551	431.196	2074.04	766.256	77.0013	262.845	2447.17	774.052	0.749474	Infected	2	3
74.4662	441.083	1985.09	759.97	76.1064	291.866	2571.12	834.97	0.740553	Infected	2	3
81.7726	251.128	1708.32	442.253	79.1666	185.993	2304.2	628.633	0.684655	Infected	2	3
77.9365	343.242	1794.42	624.713	80.2213	250.429	2483.5	691.298	0.662408	Infected	2	3
69.8797	444.414	2241.71	894.189	71.3884	294.55	2519.07	928.195	0.762632	Infected	2	3
77.7085	363.656	1704.77	616.851	82.1739	265.889	2209.62	608.572	0.660632	Infected	2	3
80.2022	375.09	1708.45	584.269	81.6067	279.591	2402.41	666.259	0.697591	Infected	2	3
83.1119	277.748	1717.91	489.063	80.3392	182.348	2509.4	646.938	0.720727	Infected	2	3
72.7985	598.102	4300.48	1178.2	76.0843	679.645	3799.01	1369.96	0.771299	Infected	2	3
67.1188	692.789	2478.76	1071.91	71.6729	660.206	3433.81	1407.67	0.768096	Infected	2	3
69.4442	710.137	2532.52	1096.24	73.3768	743.611	4012.93	1520.29	0.779819	Infected	2	3
76.7881	577.12	2044.59	803.652	77.4199	610.487	3280.54	1187.5	0.740468	Infected	2	3
73.043	587.967	2042.56	858.466	76.3739	681.909	3660.42	1315.32	0.78792	Infected	2	3
73.5526	583.96	2063.76	852.475	77.7265	622.709	3595.91	1215.49	0.737931	Infected	2	3
75.4767	583.067	2179.47	857.267	76.2743	693.048	3640.42	1329.61	0.770728	Infected	2	3
84.1933	289.631	2128.32	481.837	80.5045	337.575	2910.86	840.524	0.792611	Infected	2	3
67.9111	666.892	2342.41	1042.5	72.2518	732.801	3575.27	1477.33	0.723259	Infected	2	3
74.9105	563.209	1792.34	770.817	76.2552	555.03	3064.27	1130.66	0.752284	Infected	2	3
75.2853	520.109	2043.18	795.168	74.8053	558.223	3341.57	1241.88	0.765436	Infected	2	3
71.7632	533.039	2029.22	893.851	77.1504	652.593	3664.66	1339.6	0.648821	Infected	2	3
67.1773	422.706	2045.36	851.744	60.9085	453.803	2537.09	1261.23	0.776759	Infected	2	3
71.0501	467.973	3497.71	1065.46	69.7317	501.799	3267.43	1319.07	0.792166	Infected	2	3
68.1348	471.414	2297.51	931.93	62.4201	463.413	2734.89	1295.93	0.745308	Infected	2	3
68.569	399.598	2151.85	852.048	63.6603	463.378	2991.02	1337.84	0.742769	Infected	2	3
79.613	386.71	1876.59	624.864	82.1269	431.07	2766.7	835.279	0.781389	Infected	2	3
74.8256	428.524	1983.23	738.243	77.0424	551.597	3197.8	1145.44	0.763667	Infected	2	3
74.7188	393.029	2240.77	768.696	72.5355	510.238	3198.89	1245.98	0.778356	Infected	2	3
70.7344	402.208	2086.67	793.675	70.7283	487.88	2975.51	1201.71	0.782536	Infected	2	3
72.6155	381.368	2188.94	783.961	69.375	498.798	3121.82	1282.96	0.744659	Infected	2	3
77.0688	363.986	1858.92	655.52	80.416	396.104	2646.65	826.743	0.697455	Infected	2	3
75.1622	377.165	1856.16	666.938	76.7568	520.232	3367.64	1163.59	0.747259	Infected	2	3
78.7035	402.301	1932.2	656.368	79.9232	453.199	2877.62	934.213	0.779043	Infected	2	3
76.6322	458.737	2051.87	715.136	78.3123	516.6	3012.67	1057.32	0.808151	Infected	2	3
75.5015	342.625	2040.11	673.08	74.9853	329.985	2835.2	943.613	0.822647	Infected	2	3
76.4291	306.742	1797.7	586.114	77.2277	334.443	2760.77	875.579	0.785254	Infected	2	3
73.9628	320.472	2103.43	709.159	72.524	304.746	2805.23	987.064	0.757111	Infected	2	3
71.9398	373.452	2169.59	785.356	70.3726	378.479	3075.86	1140.86	0.777259	Infected	2	3
75.0869	316.317	2039.64	679.003	73.0364	314.707	2846.19	988.16	0.771151	Infected	2	3
70.3485	352.266	2618.16	847.218	68.3625	335.796	2843.95	1103.69	0.775182	Infected	2	3
78.2434	333.606	1932.5	613.744	77.7475	334.19	2762.4	870.844	0.806144	Infected	2	3
76.5751	380.383	1962.05	671.589	77.6465	339.672	3031	917.802	0.808812	Infected	2	3
77.7744	354.258	1905.34	582.44	80.0901	336.49	2738.98	801.15	0.85398	Infected	2	3
80.4365	259.974	1883.08	470.6	80.4508	407.619	3349.51	866.898	0.95097	Infected	2	3
80.8139	214.651	1646.9	448.981	75.8524	434.963	2822.07	986.214	0.766446	Infected	3	3
79.0426	218.896	1609.72	469.368	75.5646	384.902	2898.32	993.937	0.76036	Infected	3	3
79.2785	233.522	1637.68	479.053	75.3306	375.133	2801.61	967.051	0.751943	Infected	3	3
78.6386	219.224	1682.43	499.963	74.142	370.672	2736.54	969.261	0.749757	Infected	3	3
77.3828	180.099	1465.2	441.796	74.1329	286.623	2423.25	834.176	0.658026	Infected	3	3
77.859	158.59	1435.27	418.047	74.3232	297.581	2437.41	838.373	0.607444	Infected	3	3
78.1653	213.005	1706.31	513.205	74.0729	402.148	2880.45	1031.12	0.76774	Infected	3	3
78.8114	228.808	1637.31	487.661	75.37	371.913	2795.48	962.273	0.758185	Infected	3	3
79.9325	272.251	1806.85	532.273	75.5642	400.398	2869.97	988.638	0.791613	Infected	3	3
78.9528	208.459	1589.54	456.443	74.8826	348.199	2603.75	902.781	0.725498	Infected	3	3
79.7347	230.642	1559.74	458.6	77.0443	351.153	2635.38	868.812	0.719462	Infected	3	3
72.8945	251.562	1943.45	661.144	75.3446	374.651	2764.54	951.183	0.681209	Infected	3	3
78.4273	217.719	1572.37	485.13	79.004	279.371	2286.27	697.731	0.66535	Infected	3	3
80.1216	211.609	1718.41	485.28	80.8168	279.17	2527.11	721.348	0.664211	Infected	3	3
80.9039	204.268	1641.76	459.685	73.9652	313.107	2590.16	905.551	0.75984	Infected	3	3
84.1117	152.406	1292.59	320.582	76.283	259.443	2616.86	815.457	0.647631	Infected	3	3
78.9769	190.709	1422.52	434.062	77.5611	269.767	2378.15	742.069	0.624198	Infected	3	3
78.6115	199.041	1394.51	429.816	81.3934	253.581	2098.99	594.549	0.594277	Infected	3	3
78.4897	183.172	1444.48	431.522	80.6321	261.215	2270.59	647.392	0.607932	Infected	3	3
76.1055	199.976	1386.44	447.161	80.3822	269.335	2197.32	642.229	0.619088	Infected	3	3
75.4426	183.867	1473.8	475.167	74.2852	236.611	2242.87	750.461	0.651572	Infected	3	3
77.553	177.778	1297.24	404.733	79.3975	238.745	2169.04	631.278	0.610221	Infected	3	3
78.8301	195.201	1471.19	431.755	79.7978	273.677	2357.64	694.369	0.720023	Infected	3	3
80.172	229.995	1791.59	496.743	80.0472	342.317	3143.34	882.684	0.746956	Infected	3	3
77.6607	223.321	1547.89	493.989	80.0754	275.358	2200.79	655.017	0.637817	Infected	3	3
81.0471	209.498	1525.38	421.856	80.6058	289.593	2603.91	728.945	0.687297	Infected	3	3
81.9969	196.795	1422.01	393.424	80.6393	298.677	2394.31	696.226	0.69737	Infected	3	3
80.0917	171.899	1317.54	382.555	82.5539	276.813	2169.33	603.839	0.669606	Infected	3	3
80.4601	204.395	1423.9	411.25	77.3622	265.5	2531.03	776.04	0.705555	Infected	3	3
90.4545	46.6801	975.66	135.768	83.264	176.141	2124.36	503.036	0.610672	Infected	3	3
87.7684	84.4105	1109.38	207.33	82.5424	214.175	2300.36	574.628	0.725561	Infected	3	3
83.2329	192.281	1962.55	430.056	73.096	376.421	3264.74	1132.25	0.723109	Infected	3	3
87.7537	107.011	1338.15	252.004	79.5678	285.896	2617.73	754.314	0.732625	Infected	3	3
88.4388	91.7976	1225.67	215.433	80.982	230.606	2378.15	641.152	0.703025	Infected	3	3
88.8269	62.5196	926.791	155.421	84.2341	256.023	2268.97	566.683	0.66524	Infected	3	3
88.0365	86.6829	972.608	184.354	84.5222	258.551	2346.05	579.642	0.760381	Infected	3	3
85.8363	120.721	1331	278.394	81.6276	225.583	2367.7	621.148	0.738533	Infected	3	3
89.255	45.8737	947.344	141.146	84.1962	194.185	2115.64	495.116	0.632496	Infected	3	3
86.3441	115.828	1068.21	234.502	80.7383	275.197	2506.68	697.417	0.777368	Infected	3	3
79.033	271.634	1676.92	529.05	79.2251	472.127	2878.91	970.324	0.758846	Infected	3	3
79.716	194.927	1371.37	393.788	83.0752	389.505	2619.43	761.754	0.695936	Infected	3	3
81.5524	216.347	1697.46	469.034	78.0477	382.207	2838.93	907.754	0.68121	Infected	3	3
70.1801	269.96	2017.67	729.483	65.1888	452.439	2757.07	1243.55	0.737718	Infected	3	3
75.8985	236.607	1867.63	578.052	74.8018	544.476	3175.15	1185.95	0.735199	Infected	3	3
77.5037	252.263	1754.49	548.22	76.1527	462.347	2769.37	989.209	0.732616	Infected	3	3
78.9693	204.709	1519.95	449.294	77.9063	391.877	2693.15	887.757	0.696379	Infected	3	3
80.7343	241.829	1471.68	433.664	81.5096	429.117	2816.39	857.935	0.764874	Infected	3	3
79.7301	266.915	1686.97	508.245	76.9124	443.971	2916.11	1003.07	0.76743	Infected	3	3
90.6351	88.8037	1442.42	203.517	71.5436	632.475	3298.04	1353.17	0.774844	Infected	3	3
86.6415	119.888	1409.89	268.79	72.667	502.856	3173.59	1191.12	0.783237	Infected	3	3
88.1942	96.9376	1301.38	228.929	75.7014	473.06	3208.25	1112.03	0.790324	Infected	3	3
87.5417	119.796	1604.89	305.339	71.2454	469.402	3123.29	1196.82	0.76036	Infected	3	3
75.03	533.592	2014.74	802.984	84.463	133.093	2339.25	474.74	0.83587	Infected	4	3
76.1046	517.083	1877.61	759.29	85.5954	128.063	2296.45	440.819	0.827672	Infected	4	3
75.3944	518.647	1819.89	735.948	86.4885	148.312	2313.9	442.007	0.873823	Infected	4	3
74.2137	511.049	2071.02	805.838	86.9362	119.95	2280.48	410.697	0.773348	Infected	4	3
77.7227	264.798	1711.35	538.795	74.9654	298.714	2662.03	877.673	0.719875	Infected	4	3
77.7123	269.569	1768.55	552.228	75.7449	324	2758.88	904.964	0.761215	Infected	4	3
76.9398	313.084	1771.62	592.134	76.3708	325.215	2746.62	884.991	0.795882	Infected	4	3
75.2775	327.544	2035.29	669.131	74.5862	406.335	2805.93	1006.92	0.756966	Infected	4	3
79.4682	342.108	1844.53	581.734	77.1982	354.796	2834.87	902.067	0.790259	Infected	4	3
78.8114	218.719	1975.12	549.826	66.5938	2256.87	4567.86	2807.34	0.739033	Infected	4	3
80.4629	226.821	1885.35	502.478	71.9994	1832.17	4805.72	2374.75	0.784455	Infected	4	3
82.0327	180.894	1896.72	469.325	70.2258	1712.6	3649.89	2176.82	0.72036	Infected	4	3
78.2906	231.832	1974.47	566.343	68.0876	1917.67	4187.86	2409.36	0.755186	Infected	4	3
76.3835	316.68	1857.89	612.452	73.7175	650.085	3573.85	1352.89	0.739515	Infected	4	3
79.0695	278.064	1660.81	526.276	79.6506	548.423	2996.43	1030.86	0.727766	Infected	4	3
74.6634	344.133	2236.27	736.365	68.4098	759.472	3945.98	1666.66	0.805874	Infected	4	3
74.938	371.856	2028.19	709.82	77.591	741.917	3564.45	1326.24	0.777157	Infected	4	3
73.3463	361.951	1960.91	710.525	72.7237	842.553	3812.34	1579.26	0.756536	Infected	4	3
75.7892	401.821	2385.64	746.354	72.0643	830.142	3967.22	1661.91	0.840273	Infected	4	3
72.7287	328.576	2072.67	746.313	68.6101	947.36	4171.01	1833.41	0.66163	Infected	4	3
71.4913	380.627	2182.88	794.21	69.2199	827.865	6965.36	1850.29	0.776768	Infected	4	3
78.148	280.886	1816.73	583.714	77.4903	307.227	2554.86	841.938	0.7095	Infected	4	3
80.9406	368.162	1821.28	577.675	80.5493	400.9	2842.04	868.34	0.820869	Infected	4	3
77.2339	345.465	1818.35	623.048	75.6944	376.08	2801.68	943.887	0.783568	Infected	4	3
74.2144	353.159	2054.54	721.769	74.8443	390.732	2880.09	1011.14	0.778886	Infected	4	3
77.4072	322.777	1808.87	604.908	76.7793	361.349	2746.47	905.043	0.752983	Infected	4	3
75.7838	408.612	2043.98	722.529	74.3083	652.089	3605.55	1335.94	0.778519	Infected	4	3
81.5305	174.603	1458.71	387.692	77.0918	401.221	2753.7	927.492	0.669962	Infected	5	3
80.4226	171.054	1426.81	388.296	75.506	411.542	2761.66	988.218	0.699853	Infected	5	3
82.3629	172.359	1715.64	422.48	70.1015	568.923	3222.07	1321.9	0.719715	Infected	5	3
74.6807	179.213	1711.25	527.81	61.1413	438.771	2791.18	1335.99	0.736645	Infected	5	3
74.8288	372.418	1955.14	717.108	71.7725	479.016	2919.01	1158.94	0.763296	Infected	5	3
78.5081	367.339	2126.26	669.306	72.404	436.998	3043.37	1133.7	0.764355	Infected	5	3
74.29	349.21	2090.4	705.37	73.908	478.588	2979.51	1109.96	0.730858	Infected	5	3
76.0992	316.969	1816.79	630.07	76.4635	395.388	2620.67	921.386	0.650802	Infected	5	3
86.1924	124.093	1438.14	300.003	76.1654	673.79	3455.06	1297.93	0.736321	Infected	5	3
88.768	88.8266	1416.71	238.663	71.4184	760.848	3750.03	1554.87	0.698078	Infected	5	3
85.6234	136.234	1595.82	315.707	71.6441	750.209	3682.64	1526.73	0.739737	Infected	5	3
87.4535	99.6112	1324.27	237.865	73.343	730.031	3406.35	1419.27	0.710612	Infected	5	3
90.8131	49.1191	871.388	122.065	77.819	562.327	2881.84	1066.19	0.701528	Infected	5	3
88.5168	91.903	1336.77	229.616	71.6151	748.139	3506	1496.79	0.6999	Infected	5	3
71.7245	694.9	1936.81	897.773	78.6183	975.578	4327.29	1653.72	0.821077	Infected	5	3
65.2148	972.505	2232.81	1174.18	76.8351	1185.34	4657.32	1844.85	0.760167	Infected	5	3
62.0462	1086.02	2434.3	1314.18	74.4416	1248.43	7057.95	2158.18	0.753941	Infected	5	3
60.941	1103.53	2243.16	1259.12	72.0029	1309.62	5926.72	2231.24	0.773425	Infected	5	3
68.3339	831.562	1935.67	984.395	78.0335	841.801	3869.76	1450.45	0.66524	Infected	5	3
72.3744	783.578	2223.86	986.276	78.3195	1019.68	5073.36	1782.16	0.811867	Infected	5	3
80.4052	195.684	1641.07	454.836	75.974	443.143	2910.28	1010.67	0.702749	Infected	5	3
81.2979	179.205	1402.15	374.076	78.6632	408.747	2678.79	881.267	0.758309	Infected	5	3
81.6867	191.824	1691.38	442.527	73.8666	513.027	3371.37	1215.06	0.7362	Infected	5	3
82.1254	145.269	1410.7	358.288	75.8385	392.889	2604.54	930.993	0.605907	Infected	5	3
80.724	173.494	1485.53	405.695	76.1771	388.254	2840.12	956.353	0.683945	Infected	5	3
83.6044	172.625	1399.41	345.292	79.9763	385.907	2697.33	840.974	0.723759	Infected	5	3
82.3712	160.173	1474.01	369.364	76.3924	406.228	2893.3	991.405	0.736887	Infected	5	3
85.043	124.119	1279.75	280.998	75.3355	368.211	2579	913.362	0.696649	Infected	5	3
75.3305	220.894	1629.73	541.313	76.1779	449.173	2841.6	1009.4	0.690926	Infected	5	3
80.9861	172.737	1439.75	385.346	71.3926	439.941	2885.98	1131.02	0.735007	Infected	5	3
78.535	159.742	1435.03	418.037	71.4532	370.387	2539.53	990.073	0.652179	Infected	5	3
79.4503	189.833	1509.86	435.757	74.0469	377.007	2510.01	925.219	0.69147	Infected	5	3
79.2642	178.227	1454.97	419.459	77.2748	379.927	2652.79	887.055	0.664479	Infected	5	3
78.8944	166.821	1416.89	398.886	72.3626	378.388	2540.67	974.676	0.663231	Infected	5	3
80.4585	187.762	1410.9	397.634	76.4062	411.433	2747.52	953.835	0.739136	Infected	5	3
89.6599	77.4522	1262.65	199.729	73.716	635.624	3178.69	1283.56	0.692154	Infected	5	3
90.9869	59.9336	1029.96	142.426	75.6765	657.401	3276.41	1269.78	0.664199	Infected	5	3
89.6918	64.7726	1320.42	199.628	70.1386	653.127	3899.43	1419.54	0.656298	Infected	5	3
90.6034	60.9016	1159.62	166.087	74.7511	619.42	3271.43	1244.59	0.68877	Infected	5	3
89.6334	65.0054	1345.54	207.051	67.068	698.781	3360.64	1520.53	0.675949	Infected	5	3
90.1063	58.5305	1143.2	163.041	70.2037	589.568	2964.67	1278.86	0.703143	Infected	5	3
90.8073	59.8354	1077.43	150.898	76.1228	555.706	2970.2	1100.82	0.656031	Infected	5	3
88.9296	87.5472	1312.19	212.914	76.2662	647.003	3445.57	1278.25	0.734023	Infected	5	3
90.088	63.7309	1061.44	157.598	76.5711	598.814	3034.67	1155	0.73198	Infected	5	3
78.3056	272.846	1497.49	467.416	79.5732	609.534	3465.47	1161.86	0.829366	Infected	6	3
76.5312	285.033	1879.16	603.333	71.7233	837.858	3644.55	1580.62	0.876067	Infected	6	3
77.3173	276.906	1775.89	560.437	73.2627	590.677	3227.4	1266.82	0.770676	Infected	6	3
78.6205	281.381	1869.76	570.584	74.2807	524.006	3132.93	1176.61	0.785245	Infected	6	3
79.4455	269.768	1690.14	507.614	86.2447	135.287	2381.23	450.188	0.73257	Infected	6	3
76.2571	313.181	2244.72	690.096	81.748	211.318	2739.43	672.166	0.759438	Infected	6	3
80.1713	227.252	1568.67	446.802	85.2042	145.459	2621	511.789	0.7867	Infected	6	3
78.5537	240.111	1680.5	508.079	86.3635	126.009	2287.25	426.993	0.756323	Infected	6	3
73.9803	276.15	1804.22	605.01	84.025	113.526	2325.17	473.99	0.778526	Infected	6	3
76.2881	255.938	1897.27	600.539	85.2117	117.701	2272.49	440.678	0.776754	Infected	6	3
75.6121	260.962	2407.46	697.424	75.3822	324.449	3087.46	990.077	0.750351	Infected	6	3
78.8995	199.672	1763.3	498.005	85.486	206.273	2749.6	590.759	0.737595	Infected	6	3
79.587	216.37	1668.92	468.917	85.6816	128.716	2231.61	437.35	0.780547	Infected	6	3
75.8558	306.508	2125.14	668.991	81.8647	201.634	2508.98	622.939	0.765606	Infected	6	3
78.4149	279.814	2100.24	627.876	84.5284	128.057	2421.61	490.786	0.761467	Infected	6	3
80.1693	222.45	1757.96	484.252	87.0353	114.116	2126.51	378.961	0.76759	Infected	6	3
78.657	189.147	1545.66	462.825	90.0185	67.4194	1882.9	258.925	0.664967	Infected	6	3
92.0188	90.2001	1402.61	172.284	94.6557	43.2793	2329	169.847	0.752136	Infected	6	3
78.8468	193.086	1371.18	416.112	89.3728	87.4935	2065.18	305.478	0.646902	Infected	6	3
76.5103	336.47	2349.45	731.455	82.3797	139.039	2605.2	581.019	0.782507	Infected	6	3
80.0405	191.45	1497.93	402.044	80.5767	253.837	2564.97	686.888	0.670177	Infected	6	3
77.1833	302.085	1796.43	585.87	77.407	335.297	2590.76	834.287	0.696737	Infected	6	3
79.777	220.292	1441.21	431.539	79.9685	263.75	2353.26	681.826	0.729927	Infected	6	3
80.352	237.054	1555.78	456.765	81.0272	285.606	2688.72	732.226	0.744248	Infected	6	3
80.256	254.194	1772.35	508.358	75.7267	289.138	2673.7	866.617	0.724942	Infected	6	3
75.3374	249.808	1844.3	601.411	75.5123	249.443	2714.8	848.373	0.710303	Infected	6	3
78.0117	241.922	1952.07	560.975	75.5921	321.8	2647.54	888.869	0.716349	Infected	6	3
79.1733	173.247	1255.54	378.838	81.4913	219.041	2023.43	550.604	0.650723	Infected	6	3
81.7479	175.026	1471.78	397.331	94.9016	56.8346	2138.08	164.275	0.62122	Infected	6	3
87.2566	168.662	1338.22	304.746	94.3663	61.0885	2321.1	204.621	0.644353	Infected	6	3
76.704	237.385	1610.32	520.807	95.2666	25.4601	1901.25	118.218	0.678394	Infected	6	3
82.3788	165.416	1367.43	376.796	95.854	24.7371	1891.85	105.546	0.583672	Infected	6	3
77.638	256.338	1583.01	515.914	95.0887	31.2423	1876.01	123.702	0.726981	Infected	6	3
50.9637	643.798	2109.18	1205.86	90.8813	60.7094	2152.83	249.105	0.529502	Infected	6	3
82.8089	253.113	1813.33	487.725	89.7385	106.672	2695.63	367.652	0.765237	Infected	6	3
74.6003	416.158	1836.49	699.79	76.0279	629.125	3640.53	1283.75	0.967305	Infected	6	3
74.0961	365.538	1667.28	641.919	76.5642	532.632	3095.82	1106.85	0.765678	Infected	6	3
74.386	343.187	1708.88	631.037	75.9469	329.014	2775.19	860.377	0.697075	Infected	6	3
71.6409	394.783	2047.46	780.793	69.9424	393.766	2913.46	1136.36	0.762013	Infected	6	3
74.5962	395.059	2030.87	730.21	72.6573	374.537	2880.2	1046.45	0.756861	Infected	6	3
72.7791	376.619	2198.68	805.657	70.9166	340.736	2611.46	990.84	0.734427	Infected	6	3
76.3825	422.527	1968.11	706.049	78.1692	419.121	2790.71	935.664	0.778183	Infected	6	3
71.9153	408.076	2101.64	804.063	72.3207	442.421	3000.77	1139.06	0.752242	Infected	6	3
74.9728	389.579	2157.88	750.503	72.3093	353.771	2842.67	1033.97	0.805094	Infected	6	3
73.7955	365.81	1926.59	708.574	75.2147	341.616	2689.48	916.645	0.71643	Infected	6	3
73.7928	371.118	1930.04	721.445	74.3726	308.827	2427.29	848.041	0.739808	Infected	6	3
76.2518	444.948	2026.24	730.64	75.8001	422.134	2805.24	982.956	0.784654	Infected	6	3
73.9668	385.343	2170.71	757.448	72.6683	376.891	2981.05	1076.67	0.779678	Infected	6	3
74.7739	350.058	2073.65	712.857	67.276	366.008	2809.37	1163.93	0.757287	Infected	6	3
74.4867	372.031	1892.73	687.048	73.5774	353.988	2734.26	968.575	0.703589	Infected	6	3
83.0314	168.202	1460.98	354.325	73.808	679.551	3607.85	1390.84	0.772528	Infected	6	3
82.3166	150.89	1548.91	378.549	69.2059	680.811	3315.37	1462.88	0.698869	Infected	6	3
81.0263	174.158	1690.48	436.709	67.0763	668.735	3703.17	1547.23	0.722703	Infected	6	3
71.0673	526.833	2327.13	883.907	69.0152	530.5	3206.96	1320.04	0.789449	Control	1	3	58
71.1279	485.48	2507.04	897.36	66.5009	547.911	3409.26	1439.21	0.811041	Control	1	3
74.8655	442.881	2100.84	760.483	72.3999	552.411	3191.01	1244.18	0.81639	Control	1	3
76.6016	413.211	1809.8	643.357	76.5231	522.313	3142.95	1107.47	0.847375	Control	1	3
67.5688	535.871	2191.8	954.705	62.3826	619.733	3103.9	1523.15	0.815808	Control	1	3
67.5174	543.635	2406.9	1014.98	68.9806	347.861	2855.03	1113.35	0.79195	Control	1	3
85.5117	172.946	1658.32	361.199	74.9846	257.199	2831.23	889.374	0.77838	Control	1	3
83.4346	163.122	1205.5	290.27	81.6372	260.35	2346.39	637.755	0.824177	Control	1	3
81.3745	295.602	1713.57	498.762	79.9256	332.075	2660.41	796.615	0.819312	Control	2	3
80.9432	251.764	1681.6	475.375	78.2369	305.808	2653.8	814.453	0.795989	Control	2	3
75.6782	571.954	1555.66	718.967	80.0994	456.28	2806.4	911.823	0.827859	Control	2	3
83.1261	196.031	1968.83	453.492	63.9341	760.148	3585.09	1715.38	0.774024	Control	3	3
79.306	330.596	1941.55	601.737	70.802	475.885	2995.51	1184.87	0.824015	Control	3	3
88.113	123.632	1483.92	268.676	81.1508	189.048	2537.9	640.653	0.796294	Control	3	3
87.7259	92.3992	1730.57	223.9	72.4688	514.453	3270.15	1240.27	0.772771	Control	3	3
74.2195	360.175	1975.33	681.808	69.8438	633.248	3672.62	1466.34	0.820475	Control	3	3
73.9956	386.847	2346.4	795.42	63.8738	569.546	3197.51	1468.11	0.78664	Control	3	3
79.9553	220.67	1767.9	487.866	70.3334	747.405	3615.22	1552.42	0.793881	Control	4	3
84.3704	181.184	1707.47	403.323	76.71	605.527	3706.3	1273.23	0.830095	Control	4	3
82.2142	201.695	1496.23	395.667	75.7027	409.331	2884.83	999.242	0.789675	Control	4	3
86.9617	101.283	1142.84	203.239	80.9036	877.2	4260.36	1469.11	0.822117	Control	4	3
77.9144	336.591	2004.94	625.277	73.7832	332.692	2889.91	989.268	0.81629	Control	4	3
76.9356	416.696	1777.33	656.223	77.5423	320.64	2682.64	848.165	0.819856	Control	4	3
80.1209	236.399	1518.37	454.187	74.7849	366.368	2781.18	968.968	0.803219	Control	4	3
85.8144	150.423	1299.5	295.516	77.055	549.473	3410.51	1166.86	0.772355	Control	4	3
83.8824	169.64	1446.65	342.154	75.6335	649.631	3476.09	1285.86	0.805571	Control	4	3
77.9072	239.604	2229.44	636.235	69.2273	1119.83	5642.94	2073.53	0.792169	Control	4	3
85.232	150.904	1418.4	312.289	74.174	379.092	2851.6	1004.56	0.805098	Control	4	3
84.7066	138.84	1155.23	270.51	80.993	367.975	2677.34	792.672	0.820314	Control	4	3
79.3935	327.934	1795.56	573.835	76.845	327.941	2636.23	854.953	0.80795	Control	5	3
75.8346	334.047	3049.57	775.361	72.4044	333.02	2716.52	981.912	0.799445	Control	5	3
77.8152	351.311	2111.54	671.579	71.4735	317.728	2888.18	1037.34	0.826189	Control	5	3
72.4284	656.86	1971.79	879.249	77.5409	1026.89	4429.91	1725.4	0.846494	Control	5	3
74.6402	603.808	1852.39	803.319	75.8935	1009.73	4114.45	1727.42	0.876356	Control	5	3
79.9718	287.061	1576.16	498.978	76.2223	392.921	2700.5	934.506	0.763396	Control	5	3
77.5713	395.835	1766.71	612.826	77.0486	464.87	3080.09	1029.59	0.831529	Control	5	3
75.0297	594.64	1810.58	798.923	77.7806	341.797	2593.57	847.713	0.813781	Control	5	3
63.1509	767.48	2671.34	1230.59	65.97	954.597	4855.52	2102.21	0.84761	Control	5	3
72.7009	566.969	2148.63	873.746	72.8184	406.82	2941.45	1070.49	0.809929	Control	5	3
71.8851	603.3	5209.16	1158.22	74.3748	372.512	2778.76	968.665	0.818619	Control	5	3
73.8646	605.819	2324.2	922.1	76.0788	284.433	2549.03	823.982	0.815733	Control	5	3
59.5503	929.81	2205.38	1210.85	72.7858	236.014	2489.6	847.907	0.686471	Control	5	3
72.1594	605.184	2115.66	893.079	74.0203	270.224	2602.51	871.858	0.810256	Control	5	3
76.2055	329.85	2060.34	654.724	72.2958	595.465	3179.99	1276.74	0.808096	Control	5	3
79.7956	270.052	1462.8	445.183	77.3452	474.029	2968.62	1015.7	0.838901	Control	5	3
75.4902	493.467	2076.68	768.528	79.4882	230.251	2546.92	701.582	0.82028	Control	5	3
78.4748	480.574	1813.27	683.286	80.9111	212.431	2530.8	649.911	0.797186	Control	5	3
78.0758	337.716	2065.75	640.959	67.7127	466.605	3018.67	1274.59	0.810665	Control	6	3
69.8113	524.2	2660.99	1006.56	66.827	306.917	3033.03	1192.78	0.817622	Control	6	3
70.0238	514.695	2504.31	967.038	66.4735	411.102	3127.06	1269.27	0.780414	Control	6	3
77.4483	398.68	1855.75	623.918	79.375	355.437	2932.98	813.694	0.948784	Control	6	3
75.1103	298.418	1999.42	650.362	65.6431	473.801	2884.34	1281.67	0.786447	Control	6	3
73.6251	565.661	1994.48	829.626	73.7371	518.48	3294.57	1211.14	0.815816	Control	6	3
70.4901	608.436	2346.96	993.683	70.301	389.935	3101.21	1161.94	0.801382	Control	6	3
86.2564	136.801	1417.84	291.12	76.957	313.591	2660.32	849.021	0.771153	Control	6	3
82.8772	179.932	1616.72	402.463	71.4681	314.956	2850.08	1032.51	0.784278	Control	6	3
78.1055	299.944	1898.88	601.297	73.6375	287.023	2633.42	903.808	0.775993	Control	6	3
79.1929	232.649	1514.95	475.942	73.6918	290.635	2586.85	893.618	0.714893	Control	6	3

## Sheet: 3C-OMI index
OMI index	Group	Fish	Repeat
0.615977	Infected	1	1
0.465062	Infected	1	1
0.88649	Infected	1	1
0.981351	Infected	1	1
0.719242	Infected	1	1
0.654978	Infected	1	1
0.810341	Infected	1	1
0.700364	Infected	1	1
0.733552	Infected	1	1
0.717122	Infected	1	1
0.792327	Infected	1	1
0.793473	Infected	1	1
0.81525	Infected	1	1
0.675759	Infected	1	1
0.94532	Infected	1	1
0.868311	Infected	1	1
1.4012	Infected	1	1
1.21153	Infected	1	1
0.591969	Infected	1	1
0.669227	Infected	1	1
0.672754	Infected	1	1
1.0356	Infected	1	1
0.949029	Infected	1	1
0.525351	Infected	1	1
1.0086	Infected	1	1
0.696452	Infected	1	1
0.685935	Infected	1	1
0.914844	Infected	1	1
0.791954	Infected	1	1
0.923191	Infected	1	1
1.16612	Infected	1	1
1.50381	Infected	1	1
1.16739	Infected	1	1
1.16494	Infected	1	1
0.742896	Infected	1	1
0.766253	Infected	1	1
0.769937	Infected	1	1
0.756159	Infected	1	1
1.29146	Infected	1	1
0.90027	Infected	1	1
0.789959	Infected	1	1
0.69303	Infected	1	1
1.0777	Infected	1	1
1.00851	Infected	1	1
0.876364	Infected	1	1
0.911804	Infected	1	1
0.694452	Infected	1	1
0.757656	Infected	1	1
0.847064	Infected	1	1
0.987491	Infected	1	1
0.783626	Infected	1	1
1.29846	Infected	1	1
0.868862	Infected	1	1
2.32101	Infected	1	1
0.502731	Infected	1	1
0.810937	Infected	1	1
0.687077	Infected	1	1
0.296433	Infected	1	1
0.820727	Infected	1	1
0.721235	Infected	1	1
0.725288	Infected	1	1
0.571799	Infected	1	1
0.413483	Infected	1	1
0.634614	Infected	1	1
0.818696	Infected	1	1
0.747562	Infected	1	1
0.545162	Infected	1	1
0.958291	Infected	1	1
0.848487	Infected	1	1
0.767402	Infected	1	1
0.906563	Infected	1	1
1.37574	Infected	1	1
0.602818	Infected	1	1
0.889799	Infected	2	1
0.89991	Infected	2	1
0.783122	Infected	2	1
0.644383	Infected	2	1
0.855152	Infected	2	1
0.745457	Infected	2	1
0.960001	Infected	2	1
0.944268	Infected	2	1
0.792373	Infected	2	1
0.848772	Infected	2	1
0.700549	Infected	2	1
0.656155	Infected	2	1
0.796294	Infected	2	1
0.796944	Infected	2	1
0.910031	Infected	2	1
0.894535	Infected	2	1
0.963122	Infected	2	1
0.769691	Infected	2	1
0.744007	Infected	2	1
0.845362	Infected	2	1
0.795704	Infected	2	1
0.678984	Infected	2	1
0.702012	Infected	2	1
0.596159	Infected	2	1
0.815213	Infected	2	1
0.177412	Infected	2	1
0.869491	Infected	2	1
0.971567	Infected	2	1
0.662724	Infected	2	1
0.834278	Infected	2	1
0.721183	Infected	2	1
0.856546	Infected	2	1
0.888059	Infected	2	1
0.856601	Infected	2	1
0.92012	Infected	2	1
0.789258	Infected	2	1
0.838766	Infected	2	1
1.02597	Infected	2	1
1.27499	Infected	2	1
0.675546	Infected	2	1
0.60795	Infected	2	1
0.860423	Infected	2	1
0.451343	Infected	2	1
0.955065	Infected	2	1
0.868618	Infected	2	1
0.814922	Infected	2	1
0.883584	Infected	2	1
1.00427	Infected	2	1
0.7502	Infected	2	1
0.859517	Infected	2	1
0.998271	Infected	2	1
0.969752	Infected	2	1
0.86321	Infected	2	1
0.803755	Infected	2	1
1.12826	Infected	2	1
0.387071	Infected	2	1
0.833622	Infected	2	1
1.12631	Infected	2	1
0.946533	Infected	2	1
0.692645	Infected	2	1
0.597661	Infected	2	1
1.052	Infected	3	1
0.679112	Infected	3	1
0.750668	Infected	3	1
1.0028	Infected	3	1
0.896706	Infected	3	1
0.964337	Infected	3	1
0.99119	Infected	3	1
0.667526	Infected	3	1
0.88024	Infected	3	1
0.832537	Infected	3	1
0.969186	Infected	3	1
0.976499	Infected	3	1
1.00363	Infected	3	1
1.029	Infected	3	1
0.917892	Infected	3	1
0.89291	Infected	3	1
0.644274	Infected	3	1
0.868703	Infected	3	1
0.873109	Infected	3	1
0.813717	Infected	3	1
0.689022	Infected	3	1
0.852795	Infected	3	1
0.828309	Infected	3	1
0.84208	Infected	3	1
0.930529	Infected	3	1
0.794383	Infected	3	1
1.01384	Infected	3	1
0.826738	Infected	3	1
0.707219	Infected	3	1
0.968004	Infected	3	1
0.580697	Infected	3	1
0.803624	Infected	3	1
1.04145	Infected	3	1
0.679283	Infected	3	1
0.766576	Infected	3	1
0.869975	Infected	3	1
0.861056	Infected	3	1
0.609899	Infected	3	1
0.846958	Infected	3	1
0.857745	Infected	3	1
0.610723	Infected	3	1
0.817494	Infected	3	1
0.871377	Infected	3	1
0.659588	Infected	3	1
0.594376	Infected	3	1
0.611497	Infected	3	1
0.782012	Infected	3	1
0.843779	Infected	3	1
0.930063	Infected	3	1
0.990973	Infected	3	1
0.855347	Infected	3	1
0.85323	Infected	3	1
0.799064	Infected	3	1
0.940003	Infected	3	1
0.797695	Infected	3	1
0.696084	Infected	3	1
0.937945	Infected	3	1
0.800665	Infected	3	1
0.726601	Infected	3	1
0.91742	Infected	3	1
0.754641	Infected	3	1
0.691988	Infected	3	1
0.63236	Infected	3	1
0.698876	Infected	3	1
0.86464	Infected	3	1
0.607466	Infected	3	1
0.727885	Infected	3	1
0.707499	Infected	3	1
0.704442	Infected	3	1
0.549845	Infected	3	1
0.701581	Infected	3	1
0.363604	Infected	3	1
0.607648	Infected	3	1
1.05031	Infected	3	1
1.13981	Infected	3	1
0.81388	Infected	3	1
0.809394	Infected	3	1
0.886051	Infected	3	1
0.870607	Infected	3	1
1.22887	Infected	3	1
0.892257	Infected	3	1
0.70394	Infected	3	1
0.776902	Infected	3	1
0.717937	Infected	3	1
0.776868	Infected	3	1
0.852212	Infected	3	1
0.907076	Infected	3	1
0.814377	Infected	3	1
0.738693	Infected	3	1
0.882805	Infected	3	1
0.901484	Infected	3	1
0.741183	Infected	3	1
0.714035	Infected	3	1
0.593969	Infected	3	1
0.820231	Infected	3	1
1.06886	Infected	3	1
0.551952	Infected	3	1
0.651433	Infected	3	1
0.511828	Infected	3	1
0.663492	Infected	3	1
0.380145	Infected	4	1
0.715878	Infected	4	1
0.460303	Infected	4	1
0.670098	Infected	4	1
0.780212	Infected	4	1
0.643002	Infected	4	1
0.619553	Infected	4	1
0.648411	Infected	4	1
0.510454	Infected	4	1
0.498992	Infected	4	1
0.622925	Infected	4	1
0.735512	Infected	4	1
0.664549	Infected	4	1
1.13688	Infected	4	1
0.643142	Infected	4	1
1.37103	Infected	4	1
0.743198	Infected	4	1
0.615167	Infected	4	1
1.04849	Infected	4	1
0.892845	Infected	4	1
0.844919	Infected	4	1
1.26222	Infected	4	1
0.931269	Infected	4	1
0.640564	Infected	4	1
0.942672	Infected	4	1
0.836532	Infected	4	1
0.748972	Infected	4	1
1.15876	Infected	4	1
0.809059	Infected	4	1
0.696566	Infected	4	1
0.928834	Infected	4	1
0.848933	Infected	4	1
0.718731	Infected	4	1
1.17718	Infected	4	1
0.859528	Infected	4	1
0.599977	Infected	4	1
0.614925	Infected	4	1
0.902036	Infected	4	1
1.01616	Infected	4	1
0.913071	Infected	4	1
0.722489	Infected	4	1
0.904888	Infected	4	1
0.82535	Infected	4	1
0.790764	Infected	4	1
0.608019	Infected	4	1
0.792229	Infected	4	1
0.995908	Infected	4	1
0.665392	Infected	4	1
1.05233	Infected	4	1
0.954534	Infected	4	1
0.924872	Infected	4	1
0.877588	Infected	4	1
0.916027	Infected	4	1
0.942825	Infected	4	1
0.708105	Infected	4	1
0.666052	Infected	4	1
0.664296	Infected	4	1
0.771019	Infected	4	1
0.744768	Infected	4	1
0.788552	Infected	4	1
0.751467	Infected	4	1
0.822666	Infected	4	1
0.676445	Infected	4	1
1.02478	Infected	4	1
0.951925	Infected	4	1
0.868617	Infected	4	1
0.0888289	Infected	4	1
0.350215	Infected	4	1
0.660908	Infected	4	1
0.342374	Infected	4	1
0.710803	Infected	4	1
0.674188	Infected	4	1
0.57278	Infected	4	1
0.512218	Infected	4	1
0.656249	Infected	4	1
0.538714	Infected	4	1
0.682157	Infected	4	1
0.797108	Infected	4	1
1.09448	Infected	4	1
0.948039	Infected	4	1
0.987451	Infected	4	1
0.999395	Infected	4	1
0.923098	Infected	4	1
0.675799	Infected	4	1
0.783194	Infected	4	1
0.975834	Infected	4	1
0.706465	Infected	4	1
0.586279	Infected	4	1
0.628399	Infected	4	1
1.2183	Infected	4	1
0.780115	Infected	4	1
0.595315	Infected	4	1
0.610986	Infected	4	1
0.697166	Infected	4	1
0.968057	Infected	4	1
0.832504	Infected	4	1
0.453953	Infected	4	1
0.872385	Infected	4	1
0.693212	Infected	4	1
0.888719	Infected	4	1
0.662799	Infected	4	1
0.966057	Infected	4	1
0.547447	Infected	4	1
0.826489	Infected	4	1
1.08456	Infected	4	1
0.604573	Infected	4	1
0.764322	Infected	4	1
0.868284	Infected	4	1
0.629294	Infected	4	1
0.817732	Infected	4	1
0.633364	Infected	4	1
0.707684	Infected	4	1
0.742947	Infected	4	1
0.87284	Infected	4	1
0.712714	Infected	4	1
0.756714	Infected	4	1
1.41777	Control	1	1
1.05805	Control	1	1
1.02828	Control	1	1
0.933292	Control	1	1
1.19657	Control	1	1
1.27639	Control	1	1
1.26287	Control	2	1
0.944434	Control	2	1
0.976584	Control	2	1
0.956929	Control	2	1
0.932329	Control	2	1
0.876077	Control	3	1
0.917044	Control	4	1
0.923003	Control	4	1
1.05609	Control	4	1
0.867032	Control	4	1
1.04959	Control	5	1
0.959591	Control	5	1
0.835162	Infected	1	2
0.248422	Infected	1	2
0.73463	Infected	1	2
0.102617	Infected	1	2
0.850204	Infected	1	2
0.438184	Infected	1	2
0.385795	Infected	1	2
0.416519	Infected	1	2
0.232909	Infected	1	2
0.0863112	Infected	1	2
0.183127	Infected	1	2
0.0972714	Infected	1	2
0.260454	Infected	1	2
0.127488	Infected	1	2
0.323871	Infected	1	2
1.29455	Infected	1	2
0.302009	Infected	1	2
0.23097	Infected	1	2
0.0667366	Infected	1	2
0.443761	Infected	1	2
0.33187	Infected	1	2
0.987444	Infected	1	2
1.03425	Infected	1	2
1.25702	Infected	1	2
1.00887	Infected	1	2
0.894357	Infected	1	2
0.988251	Infected	1	2
0.967784	Infected	1	2
1.05135	Infected	1	2
1.06209	Infected	1	2
0.965888	Infected	1	2
0.953954	Infected	1	2
0.96694	Infected	1	2
0.94115	Infected	1	2
1.19347	Infected	1	2
1.29025	Infected	1	2
1.43261	Infected	1	2
1.25272	Infected	1	2
1.57847	Infected	1	2
1.38843	Infected	1	2
1.30512	Infected	1	2
1.55552	Infected	1	2
1.65924	Infected	1	2
1.40596	Infected	1	2
1.39915	Infected	1	2
1.37429	Infected	1	2
1.62896	Infected	1	2
1.45799	Infected	1	2
1.6187	Infected	1	2
1.4228	Infected	1	2
1.49205	Infected	1	2
1.49809	Infected	1	2
1.58596	Infected	1	2
0.477677	Infected	2	2
0.669663	Infected	2	2
0.51876	Infected	2	2
0.574336	Infected	2	2
0.539916	Infected	2	2
0.670431	Infected	2	2
-0.236553	Infected	2	2
0.825804	Infected	2	2
0.890297	Infected	2	2
0.639689	Infected	2	2
1.46446	Infected	2	2
0.820748	Infected	2	2
1.27581	Infected	2	2
1.09531	Infected	2	2
0.937901	Infected	2	2
1.05499	Infected	2	2
1.09598	Infected	2	2
0.923922	Infected	2	2
0.263787	Infected	3	2
-0.429235	Infected	3	2
0.00130618	Infected	3	2
-0.228343	Infected	3	2
0.0745839	Infected	3	2
-0.325415	Infected	3	2
-0.514053	Infected	3	2
-0.207294	Infected	3	2
-0.140342	Infected	3	2
-0.673565	Infected	3	2
-0.117931	Infected	3	2
0.830365	Infected	3	2
0.736477	Infected	3	2
0.858176	Infected	3	2
0.690736	Infected	3	2
0.772143	Infected	3	2
0.72449	Infected	3	2
1.44189	Infected	3	2
1.41503	Infected	3	2
1.45758	Infected	3	2
1.5362	Infected	3	2
1.51055	Infected	3	2
1.55761	Infected	3	2
1.4554	Infected	3	2
1.45479	Infected	3	2
1.02451	Infected	4	2
1.08974	Infected	4	2
0.9333	Infected	4	2
0.983324	Infected	4	2
1.1968	Infected	4	2
0.685418	Infected	4	2
0.98963	Infected	4	2
0.971478	Infected	4	2
0.964061	Infected	4	2
0.964978	Infected	4	2
0.871603	Infected	4	2
0.933369	Infected	4	2
0.950166	Infected	4	2
0.96696	Infected	4	2
1.20859	Infected	4	2
0.919137	Infected	4	2
1.25263	Infected	4	2
0.844314	Infected	4	2
0.971083	Infected	4	2
0.901584	Infected	4	2
0.883931	Infected	4	2
0.896072	Infected	4	2
1.13777	Infected	4	2
0.967461	Infected	4	2
0.901712	Infected	4	2
0.343386	Infected	4	2
0.972026	Infected	4	2
0.69651	Infected	4	2
0.732369	Infected	4	2
0.802195	Infected	4	2
0.665585	Infected	4	2
1.00017	Infected	4	2
0.57092	Infected	4	2
0.620513	Infected	4	2
2.29995	Control	1	2
2.39935	Control	1	2
0.748912	Control	1	2
1.49259	Control	1	2
1.31426	Control	1	2
1.3405	Control	1	2
1.31918	Control	2	2
2.01354	Control	2	2
1.98171	Control	2	2
1.55295	Control	2	2
1.51607	Control	2	2
1.34864	Control	2	2
1.61632	Control	2	2
1.09924	Control	3	2
2.85663	Control	3	2
2.37188	Control	3	2
-0.209575	Control	3	2
1.43132	Control	4	2
1.44432	Control	4	2
0.799325	Control	4	2
0.82549	Control	4	2
2.37539	Control	4	2
1.48858	Control	4	2
1.41656	Control	4	2
1.7019	Control	5	2
1.28495	Control	5	2
1.16859	Control	5	2
1.2392	Control	5	2
1.90194	Control	5	2
-0.124064	Infected	1	3
-0.19113	Infected	1	3
-0.0965068	Infected	1	3
0.111477	Infected	1	3
1.70311	Infected	1	3
1.57648	Infected	1	3
1.72323	Infected	1	3
1.78243	Infected	1	3
1.93674	Infected	1	3
2.01073	Infected	1	3
1.7674	Infected	1	3
1.77279	Infected	1	3
1.84172	Infected	1	3
1.61542	Infected	1	3
1.9272	Infected	1	3
1.6275	Infected	1	3
1.45826	Infected	1	3
1.66179	Infected	1	3
1.84692	Infected	1	3
1.64408	Infected	1	3
1.36372	Infected	1	3
1.29468	Infected	1	3
1.25838	Infected	1	3
1.52204	Infected	1	3
1.38395	Infected	1	3
1.5777	Infected	1	3
1.01703	Infected	1	3
1.55213	Infected	1	3
1.16214	Infected	1	3
1.28405	Infected	1	3
1.11392	Infected	1	3
1.2873	Infected	1	3
1.13189	Infected	1	3
1.59978	Infected	1	3
1.53821	Infected	1	3
1.30087	Infected	1	3
1.33515	Infected	1	3
1.15955	Infected	1	3
1.09311	Infected	1	3
1.34071	Infected	1	3
1.17943	Infected	1	3
1.24334	Infected	1	3
1.30565	Infected	1	3
0.96816	Infected	1	3
1.42686	Infected	1	3
1.59392	Infected	1	3
1.65745	Infected	1	3
1.52882	Infected	1	3
1.28126	Infected	1	3
0.461885	Infected	1	3
0.305684	Infected	1	3
0.554488	Infected	1	3
0.512446	Infected	1	3
0.59926	Infected	1	3
0.564945	Infected	1	3
0.451059	Infected	1	3
0.667769	Infected	1	3
0.689807	Infected	1	3
0.598331	Infected	1	3
0.965139	Infected	2	3
0.302712	Infected	2	3
0.92381	Infected	2	3
0.473299	Infected	2	3
0.552794	Infected	2	3
0.904464	Infected	2	3
0.544732	Infected	2	3
0.40973	Infected	2	3
0.451613	Infected	2	3
0.657234	Infected	2	3
0.880403	Infected	2	3
0.366318	Infected	2	3
0.647358	Infected	2	3
0.758313	Infected	2	3
0.914971	Infected	2	3
1.03366	Infected	2	3
0.838684	Infected	2	3
1.02809	Infected	2	3
1.26132	Infected	2	3
0.733635	Infected	2	3
0.932514	Infected	2	3
1.04382	Infected	2	3
0.768973	Infected	2	3
0.960662	Infected	2	3
0.583856	Infected	2	3
0.778022	Infected	2	3
1.00673	Infected	2	3
0.918163	Infected	2	3
1.04219	Infected	2	3
1.12838	Infected	2	3
1.02152	Infected	2	3
1.08989	Infected	2	3
0.707476	Infected	2	3
1.19912	Infected	2	3
0.973282	Infected	2	3
1.04833	Infected	2	3
1.01646	Infected	2	3
1.06312	Infected	2	3
0.890242	Infected	2	3
0.952459	Infected	2	3
0.980836	Infected	2	3
0.762861	Infected	2	3
1.02802	Infected	2	3
0.964501	Infected	2	3
1.08171	Infected	2	3
1.56835	Infected	2	3
1.48361	Infected	3	3
1.43872	Infected	3	3
1.36892	Infected	3	3
1.32178	Infected	3	3
1.13186	Infected	3	3
1.11118	Infected	3	3
1.40104	Infected	3	3
1.35326	Infected	3	3
1.34047	Infected	3	3
1.29416	Infected	3	3
1.23562	Infected	3	3
0.8318	Infected	3	3
0.868817	Infected	3	3
0.897496	Infected	3	3
1.34424	Infected	3	3
1.36135	Infected	3	3
0.976107	Infected	3	3
0.746435	Infected	3	3
0.832885	Infected	3	3
0.808739	Infected	3	3
0.938236	Infected	3	3
0.875159	Infected	3	3
1.06887	Infected	3	3
1.21169	Infected	3	3
0.750329	Infected	3	3
1.08485	Infected	3	3
1.12131	Infected	3	3
0.981659	Infected	3	3
1.19845	Infected	3	3
1.3081	Infected	3	3
1.42159	Infected	3	3
1.64845	Infected	3	3
1.56736	Infected	3	3
1.45503	Infected	3	3
1.43261	Infected	3	3
1.53378	Infected	3	3
1.34415	Infected	3	3
1.31991	Infected	3	3
1.60213	Infected	3	3
1.27255	Infected	3	3
1.2037	Infected	3	3
1.20334	Infected	3	3
1.14906	Infected	3	3
1.40752	Infected	3	3
1.21344	Infected	3	3
1.24498	Infected	3	3
1.34802	Infected	3	3
1.37503	Infected	3	3
2.52229	Infected	3	3
2.17863	Infected	3	3
2.17544	Infected	3	3
2.06884	Infected	3	3
0.136246	Infected	4	3
0.176581	Infected	4	3
0.302312	Infected	4	3
-0.0513756	Infected	4	3
1.06909	Infected	4	3
1.13937	Infected	4	3
1.07859	Infected	4	3
1.00512	Infected	4	3
1.11524	Infected	4	3
3.59058	Infected	4	3
3.20305	Infected	4	3
2.91865	Infected	4	3
3.06009	Infected	4	3
1.55527	Infected	4	3
1.30908	Infected	4	3
1.79198	Infected	4	3
1.36237	Infected	4	3
1.65847	Infected	4	3
1.81731	Infected	4	3
1.76171	Infected	4	3
1.85699	Infected	4	3
0.906157	Infected	4	3
1.12817	Infected	4	3
1.06723	Infected	4	3
0.927584	Infected	4	3
1.00919	Infected	4	3
1.34882	Infected	4	3
1.39278	Infected	5	3
1.51735	Infected	5	3
1.9073	Infected	5	3
1.7174	Infected	5	3
1.10631	Infected	5	3
1.1816	Infected	5	3
1.01789	Infected	5	3
0.814663	Infected	5	3
2.17499	Infected	5	3
2.58694	Infected	5	3
2.44366	Infected	5	3
2.4315	Infected	5	3
2.215	Infected	5	3
2.53421	Infected	5	3
1.43914	Infected	5	3
0.977074	Infected	5	3
1.06387	Infected	5	3
1.31232	Infected	5	3
0.737389	Infected	5	3
1.39496	Infected	5	3
1.40286	Infected	5	3
1.50098	Infected	5	3
1.74909	Infected	5	3
1.36273	Infected	5	3
1.41215	Infected	5	3
1.45858	Infected	5	3
1.6216	Infected	5	3
1.65388	Infected	5	3
1.18997	Infected	5	3
1.76509	Infected	5	3
1.37895	Infected	5	3
1.31632	Infected	5	3
1.26068	Infected	5	3
1.41883	Infected	5	3
1.51312	Infected	5	3
2.31068	Infected	5	3
2.37673	Infected	5	3
2.43215	Infected	5	3
2.32956	Infected	5	3
2.57801	Infected	5	3
2.40351	Infected	5	3
2.12476	Infected	5	3
2.33983	Infected	5	3
2.29922	Infected	5	3
1.76992	Infected	6	3
2.08604	Infected	6	3
1.60769	Infected	6	3
1.49023	Infected	6	3
0.601031	Infected	6	3
0.525769	Infected	6	3
0.901519	Infected	6	3
0.606886	Infected	6	3
0.486846	Infected	6	3
0.450605	Infected	6	3
0.909759	Infected	6	3
0.813594	Infected	6	3
0.745548	Infected	6	3
0.518264	Infected	6	3
0.431113	Infected	6	3
0.614977	Infected	6	3
0.345767	Infected	6	3
1.01345	Infected	6	3
0.482335	Infected	6	3
0.350813	Infected	6	3
1.0474	Infected	6	3
0.871424	Infected	6	3
1.06849	Infected	6	3
1.10037	Infected	6	3
1.13043	Infected	6	3
0.876363	Infected	6	3
1.02874	Infected	6	3
0.891006	Infected	6	3
0.299923	Infected	6	3
0.595048	Infected	6	3
0.0540632	Infected	6	3
0.210408	Infected	6	3
0.148083	Infected	6	3
-1.53487	Infected	6	3
0.588811	Infected	6	3
1.62662	Infected	6	3
1.20969	Infected	6	3
0.805304	Infected	6	3
0.932922	Infected	6	3
0.920375	Infected	6	3
0.644633	Infected	6	3
0.8631	Infected	6	3
0.869304	Infected	6	3
0.934283	Infected	6	3
0.736122	Infected	6	3
0.654536	Infected	6	3
0.880075	Infected	6	3
0.934735	Infected	6	3
1.1129	Infected	6	3
0.831736	Infected	6	3
2.23167	Infected	6	3
2.15645	Infected	6	3
2.17408	Infected	6	3
0.985507	Control	1	3
1.14467	Control	1	3
1.20379	Control	1	3
1.33503	Control	1	3
1.13376	Control	1	3
0.427781	Control	1	3
1.57164	Control	1	3
1.47324	Control	1	3
1.20809	Control	2	3
1.24701	Control	2	3
0.880893	Control	2	3
2.43616	Control	3	3
1.49218	Control	3	3
1.48155	Control	3	3
2.32641	Control	3	3
1.67521	Control	3	3
1.37141	Control	3	3
2.17811	Control	4	3
2.05913	Control	4	3
1.65573	Control	4	3
2.748	Control	4	3
1.1726	Control	4	3
0.925215	Control	4	3
1.50701	Control	4	3
2.07043	Control	4	3
2.17358	Control	4	3
2.52425	Control	4	3
1.87261	Control	4	3
1.71323	Control	4	3
1.09907	Control	5	3
0.802167	Control	5	3
1.14756	Control	5	3
1.61362	Control	5	3
1.83218	Control	5	3
1.29998	Control	5	3
1.27675	Control	5	3
0.597085	Control	5	3
1.32366	Control	5	3
0.714783	Control	5	3
-0.0384265	Control	5	3
0.294661	Control	5	3
-0.519791	Control	5	3
0.413204	Control	5	3
1.469	Control	5	3
1.6438	Control	5	3
0.484446	Control	5	3
0.570948	Control	5	3
1.50089	Control	6	3
0.590248	Control	6	3
0.719902	Control	6	3
1.15385	Control	6	3
1.4513	Control	6	3
1.00571	Control	6	3
0.553352	Control	6	3
1.66391	Control	6	3
1.67553	Control	6	3
1.05161	Control	6	3
1.22217	Control	6	3

## Sheet: FLIM statistics
Statistical results of zebrafish autofluorescence data
Mean+/-95%CI
Comparison between groups showing the overall effect; computed as fold change (ratio) or simple difference with 95%CI and p values; p<0.05
FIGURE 3	NAD(P)H tm (ps)	NAD(P)H t1 (ps)	NAD(P)H t2 (ps)	NAD(P)H a1 (%)*	FAD tm (ps)	FAD t1 (ps)	FAD t2 (ps)	FAD a1 (%)*	Optical redox ratio*	OMI index*
Control	915 (843, 992)	377 (339, 420)	2700 (2560, 2840)	75.4 (73.9, 76.8)	481 (392, 590)	247 (187, 324)	1680 (1540, 1840)	78.5 (76.1, 80.9)	0.725 (0.708, 0.742)	1.281 (1.110, 1.452)
Lm-infected	687 (608, 775)	275 (235, 323)	2340 (2220, 2460)	78.8 (77.5, 80.2)	408 (355, 468)	190 (160, 225)	1520 (1430, 1620)	79.3 (77.9, 80.8)	0.650 (0.639, 0.661)	0.947 (0.835, 1.058)
Infected / Ctrl; p value	0.75 (0.65, 0.87); 0.001	0.73 (0.59, 0.90); 0.004	0.87 (0.90, 0.93); <0.001	3.5 (1.6, 5.4); 0.001	0.85 (0.66, 1.09); 0.190	0.77 (0.55, 1.08); 0.120	0.91 (0.81, 1.02); 0.089	0.84 (-2.0, 3.7); 0.552	-0.075 (-0.096, -0.054); <0.001	-0.334 (-0.538, -0.130); 0.004
* comparison computed as a simple difference (infected minus control) and represents percentage points of change; others are computed as a fold change (ratio)
