# Supplementary material for: In vivo fluorescence lifetime imaging of macrophage intracellular metabolism during wound responses in zebrafish
Source: eLife. 2022 Feb 24;11:e66080. doi: 10.7554/eLife.66080 (PMC8871371; doi:10.7554/eLife.66080)
Supplement: Figure 4—source data 1. [file elife-66080-fig4-data1.xlsx]

## Sheet: Figure 4
F.a1.out	F.t1.out	F.t2.out	F.tm.out	N.a1.out	N.t1.out	N.t2.out	N.tm.out	rr.out	Group	Time (h)	Fish	Repeat	Count
83.3326	380.748	2021.54	586.263	78.4639	283.287	1965.94	644.234	0.674621	Tt 24	24	1	1	162
79.5164	403.316	2097.08	688.743	74.8092	290.246	2177.75	760.98	0.665434	Tt 24	24	1	1
84.1675	363.019	1740.64	546.384	80.1013	266.81	1847.99	580.296	0.646017	Tt 24	24	1	1
73.7212	455.165	2258.85	830.731	66.7972	275.046	2296.89	942.209	0.706151	Tt 24	24	1	1
51.3539	584.394	1960.43	1192.99	68.8632	219.21	1695.63	673.048	0.532194	Tt 24	24	1	1
79.222	384.309	2015.76	683.592	74.2159	297.318	2044.69	770.07	0.679058	Tt 24	24	1	1
81.9525	395.389	2118.28	625.543	77.9732	302.163	2185.68	709.671	0.666401	Tt 24	24	1	1
74.4103	383.133	2375.41	826.919	63.4719	306.363	2727.53	1178.84	0.706616	Tt 24	24	1	1
75.8965	418.484	2361.93	788.01	72.5366	346.796	2428.5	906.29	0.650512	Tt 24	24	1	1
74.2387	443.479	2287.68	822.927	71.5514	357.155	2499.52	947.11	0.654414	Tt 24	24	1	1
76.8949	401.661	1978.78	676.309	74.8443	289.59	2193.7	755.94	0.639635	Tt 24	24	1	1
79.7213	371.943	2135.93	664.511	74.0421	298.716	2170.78	767.435	0.616706	Tt 24	24	1	1
77.7195	321.745	1869.05	596.062	74.7918	261.47	2270.22	764.59	0.60367	Tt 24	24	1	1
82.6804	222.357	1204.3	359.702	84.9426	165.732	1910.36	322.863	0.486691	Tt 24	24	1	1
75.693	384.67	2156.76	740.007	73.1253	316.25	2392.08	854.597	0.679293	Tt 24	24	1	1
80.7603	373.107	1878.26	618.001	76.0684	258.195	2085.19	702.722	0.656021	Tt 24	24	1	1
79.9813	370.635	1458.73	513.791	82.6271	284.937	1773.9	514.824	0.724302	Tt 24	24	1	1
72.4412	397.115	2385.74	851.754	69.381	387.917	2758.49	1091.36	0.651459	Tt 24	24	1	1
81.8744	336.952	1739.56	549.484	78.7713	216.169	1876.76	569.774	0.595273	Tt 24	24	1	1
84.1585	341.147	1499.62	491.424	81.5923	238.831	1484.4	464.867	0.598948	Tt 24	24	1	1
54.7229	453.482	1957.39	1091.9	73.2139	138.573	1717.65	572.827	0.474339	Tt 24	24	1	1
50.8501	523.17	1986.91	1174.79	71.6241	157.973	1766.44	619.081	0.479685	Tt 24	24	1	1
74.4896	361.804	1999.06	675.938	69.3732	293.268	2582.59	976.934	0.680877	Tt 24	24	1	1
74.6284	429.187	2114.29	754.444	75.0504	365.436	2549.15	917.587	0.664161	Tt 24	24	1	1
79.0368	397.115	1889.46	650.519	76.6887	314.955	2215.68	744.101	0.675592	Tt 24	24	1	1
77.2834	361.461	2085.88	682.732	71.4097	261.315	2355.2	853.924	0.660592	Tt 24	24	1	1
87.2235	419.518	1770.59	551.375	82.0399	295.658	1855.54	574.428	0.696551	Tt 24	24	1	1
74.2986	355.011	1999.77	713.835	73.389	350.259	2422.11	896.838	0.652558	Tt 24	24	1	1
73.3954	398.132	2089.25	782.452	68.8776	329.718	2386.88	969.086	0.686937	Tt 24	24	1	1
75.4865	340.84	1776.5	621.949	77.5774	220.074	2042.53	637.35	0.577512	Tt 24	24	1	1
84.0073	340.611	1654.6	516.276	80.0907	230.69	1690.03	519.865	0.610992	Tt 24	24	1	1
72.9387	347.564	1984.15	720.12	76.4065	224.57	2028.1	654.083	0.543634	Tt 24	24	1	1
83.862	414.534	1837.67	573.593	78.7708	276.358	1999.53	639.787	0.688276	Tt 24	24	1	1
84.5972	417.998	1967.56	601.554	80.1028	320.396	1916.17	640.135	0.67794	Tt 24	24	1	1
81.5883	326.089	1308.59	453.899	81.083	271.397	1603.99	491.779	0.672881	Tt 24	24	2	1
81.3347	411.835	1799.98	598.634	77.4951	284.016	2082.06	690.665	0.694997	Tt 24	24	2	1
72.4449	285.32	1275.1	446.957	80.173	317.117	2318.95	568.659	0.774733	Tt 24	24	2	1
81.2993	400.12	1396.87	519.412	82.7957	295.52	1626.23	505.827	0.661781	Tt 24	24	2	1
78.6564	393.189	1964.07	614.887	77.0089	275.21	2053.96	684.97	0.667873	Tt 24	24	2	1
81.2074	357.423	1789.55	587.597	75.4412	280.971	2187.99	747.888	0.679418	Tt 24	24	2	1
81.0436	398.41	1922.56	649.704	76.3681	298.123	1960.84	698.219	0.661345	Tt 24	24	2	1
80.4829	386.738	1225.67	486.28	81.668	280.473	1362.25	465.869	0.70455	Tt 24	24	2	1
78.7306	325.028	1904.77	629.794	48.1371	254.141	2390.42	1353.4	0.789894	Tt 24	24	2	1
47.6607	494.794	2101.77	1235.67	73.0598	148.17	1670.65	558.831	0.42333	Tt 24	24	2	1
77.299	378.9	1828.93	623.667	74.5607	309.529	2281.81	810.303	0.654756	Tt 24	24	2	1
85.2779	409.543	1477.73	527.073	80.9007	278.84	1517.78	510.466	0.669244	Tt 24	24	2	1
84.7415	425.483	1905.88	583.28	78.5858	300.163	2071.83	677.08	0.682529	Tt 24	24	2	1
68.1382	381.546	1995.06	787.586	64.1504	326.817	2497.07	1092.28	0.701434	Tt 24	24	2	1
75.3221	404.927	1875.85	711.815	71.7614	306.813	2280.37	865.896	0.689292	Tt 24	24	2	1
78.415	361.981	1769.01	618.057	73.2214	244.798	1995.12	715.886	0.659581	Tt 24	24	2	1
86.2306	378.512	1393.23	487.716	82.8343	275.536	1439.92	465.706	0.647311	Tt 24	24	2	1
72.1874	530.53	1989.1	843.153	73.2944	327.518	2177.42	829.212	0.641551	Tt 24	24	2	1
75.5508	366.748	2309.49	742.868	73.6688	342.709	2601.29	918.062	0.667442	Tt 24	24	3	1
75.717	400.467	2225.65	775.059	70.4283	297.043	2379.76	896.868	0.677031	Tt 24	24	3	1
80.2745	411.41	2264.9	713.656	74.8141	310.286	2217	781.475	0.675751	Tt 24	24	3	1
82.3874	400.952	1669.4	576.3	79.2398	309.354	1986.83	646.469	0.68683	Tt 24	24	3	1
76.011	436.014	2029.61	748.098	69.433	305.159	2280.62	898.63	0.697071	Tt 24	24	3	1
80.4497	368.659	1893.27	603.735	77.5769	281.865	2146.65	696.18	0.660229	Tt 24	24	3	1
86.1334	410.034	1616.36	520.916	82.7475	296.931	1867.8	561.204	0.687998	Tt 24	24	3	1
85.9743	419.388	1563.22	512.538	83.9539	299.549	1730.61	525.871	0.691419	Tt 24	24	3	1
87.7625	410.527	1743.33	520.442	83.2479	293.997	1731.43	529.429	0.686392	Tt 24	24	3	1
86.2996	420.059	1535.51	513.229	83.1602	299.634	1715.99	531.537	0.676467	Tt 24	24	3	1
80.9602	424.146	2013.5	663.462	76.7914	307.652	2380.33	780.748	0.716865	Tt 24	24	3	1
90.2903	426.575	1620.72	497.101	84.5478	297.623	1749.43	517.128	0.692232	Tt 24	24	3	1
81.7079	357.538	1610.58	525.559	83.9837	278.631	1737.31	505.015	0.601421	Tt 24	24	3	1
86.2702	352.843	1923.56	525.082	78.5885	249.088	2242.51	673.443	0.687093	Tt 24	24	3	1
80.6142	243.563	1582.55	482.423	83.7466	148.391	1699.12	415.945	0.503165	Tt 24	24	3	1
79.4637	318.181	1809.83	571.154	78.9515	209.58	2059.14	603.157	0.600104	Tt 24	24	3	1
82.3926	315.635	1828.18	555.132	78.9266	229.34	1959.24	597.845	0.580136	Tt 24	24	3	1
83.3151	304.403	1712.08	492.663	79.4356	203.759	1792.46	534.042	0.643509	Tt 24	24	3	1
83.6711	303.532	1522.12	487.26	83.04	192.43	1519.66	416.318	0.536818	Tt 24	24	3	1
87.6713	407.818	1506	512.873	82.8919	274.453	1476.43	472.565	0.679032	Tt 24	24	3	1
82.8755	332.8	1487.95	494.446	82.8848	229.05	1590.89	454.572	0.58936	Tt 24	24	3	1
83.9967	382.45	1858.94	570.684	80.6702	255.103	1839.32	566.115	0.642661	Tt 24	24	3	1
85.113	414.179	1413.1	498.018	83.6627	293.282	1627.09	502.067	0.687904	Tt 24	24	3	1
87.73	433.131	2315.88	628.892	78.865	297.069	2510.49	761.633	0.718588	Tt 24	24	3	1
82.9271	396.199	1886.31	610.861	78.7451	299.23	2091.38	671.977	0.631424	Tt 24	24	3	1
81.6689	422.625	1839.17	632.7	78.6549	295.694	2112.55	699.519	0.67378	Tt 24	24	3	1
81.5515	350.143	1844.38	568.531	76.0049	259.796	2200.6	723.833	0.669806	Tt 24	24	3	1
83.6147	416.311	1807.03	586.855	79.2071	300.526	2104.76	681.175	0.697664	Tt 24	24	3	1
79.2574	406.668	2205.48	708.962	75.1848	316.633	2530.51	858.024	0.700938	Tt 24	24	3	1
79.6209	356.143	2368.09	675.103	68.78	254.514	2446.13	930.105	0.694649	Tt 24	24	3	1
75.7512	433.411	1972.03	713.888	70.3759	299.05	2354.58	892.734	0.71979	Tt 24	24	3	1
76.6248	446.253	1898.67	736.548	71.597	296.151	2152.28	826.344	0.708067	Tt 24	24	3	1
73.3836	407.819	2106.56	767.314	66.8641	317.915	2601.12	1042.69	0.698627	Tt 24	24	3	1
85.3328	411.349	1913.73	571.526	82.3229	296.124	1995.31	596.412	0.685305	Tt 24	24	4	1
81.9277	394.884	2181.48	660.596	76.9363	272.452	2167.76	706.167	0.672145	Tt 24	24	4	1
73.8649	468.694	2227.07	840.079	69.0674	329.347	2338.17	939.828	0.697451	Tt 24	24	4	1
82.3224	388.126	1332.58	499.748	82.1937	284.605	1589.89	499.506	0.661961	Tt 24	24	4	1
80.7718	433.191	2106.59	678.793	75.9101	301.739	2073.8	732.756	0.692342	Tt 24	24	4	1
79.8137	400.28	2014.37	669.759	76.4713	290.637	2073.16	712.455	0.654526	Tt 24	24	4	1
84.4088	423.274	1898.19	587.69	81.6819	316.064	2069.84	631.998	0.693821	Tt 24	24	4	1
80.0727	348.52	1864.2	604.783	77.6068	228.243	1858.27	592.843	0.619454	Tt 24	24	4	1
84.9205	445.195	2012.7	610.942	77.3472	286.022	2114.14	697.368	0.708062	Tt 24	24	4	1
84.5878	426.724	1735.17	580.818	80.5743	288.329	1900.27	603.24	0.686834	Tt 24	24	4	1
73.844	421.006	2382.56	832.529	69.7679	364.049	2465.09	983.23	0.680638	Tt 24	24	4	1
48.2978	784.178	1969.05	1318.1	64.6454	324.534	1995.53	906.491	0.524445	Tt 24	24	4	1
82.3232	409.148	1721.68	583.682	79.9879	285.148	1933.71	629.237	0.686096	Tt 24	24	4	1
78.0358	410.997	2035.93	707.687	72.7949	290.769	2141.48	797.154	0.670598	Tt 24	24	4	1
76.4058	418.542	2095.71	745.106	77.0917	293.284	2056.3	696.081	0.626734	Tt 24	24	4	1
77.1317	451.886	2766.83	909.042	77.0688	330.429	2430.8	796.51	0.61908	Tt 24	24	4	1
75.4465	352.068	1998.72	687.852	76.9453	219.414	1983.36	622.625	0.588586	Tt 24	24	4	1
78.6724	300.877	1749.01	578.288	76.7255	226.202	1921.13	620.286	0.584667	Tt 24	24	4	1
47.0437	454.967	1914.06	1176.44	77.0417	114.914	1705.51	477.178	0.482703	Tt 24	24	4	1
81.3669	393.917	1267.05	491.04	82.564	286.334	1544.74	484.641	0.667633	Tt 24	24	4	1
84.8701	394.405	1522.2	529.51	80.4991	267.239	1568.7	518.364	0.661607	Tt 24	24	4	1
72.4962	432.476	2489.13	915.393	66.9698	402.616	2623.16	1118.91	0.688018	Tt 24	24	4	1
71.0556	463.135	2555.56	926.528	71.7777	347.49	2645.32	975.597	0.636178	Tt 24	24	4	1
81.6429	410.725	1990.98	656.347	78.3175	321.546	2216.33	743.439	0.665507	Tt 24	24	4	1
79.652	374.185	2423.03	751.372	74.5368	281.882	2557.61	855.558	0.665701	Tt 24	24	4	1
74.5995	447.159	2275.69	840.94	72.3915	336.57	2831.94	1012.79	0.693783	Tt 24	24	4	1
87.5558	429.195	1574.14	497.581	81.4863	274.594	1408.97	475.872	0.688231	Tt 24	24	4	1
77.5078	425.192	1814.11	697.979	75.987	297.355	2078.37	744.099	0.670727	Tt 24	24	4	1
82.662	376.76	1814.84	589.702	77.032	256.144	1899.89	638.187	0.657332	Tt 24	24	4	1
79.7358	449.058	2027.81	694.437	75.2148	263.4	2083.55	729.374	0.691642	Tt 24	24	4	1
71.6762	436.447	2342.48	882.659	67.1305	300.315	2534.55	1027.49	0.6905	Tt 24	24	4	1
85.9307	424.189	1256.74	501.378	80.9526	274.081	1428.61	485.853	0.667515	Tt 24	24	4	1
82.1208	393.709	1825.55	582.72	79.6371	263.489	2001.93	611.097	0.671056	Tt 24	24	4	1
85.5604	410.716	1588.84	537.836	79.1841	269.109	1657.03	560.096	0.672934	Tt 24	24	5	1
72.7227	453.09	2124.35	832.655	61.4051	411.02	2504.7	1202.91	0.702128	Tt 24	24	5	1
83.4617	429.57	1534.51	579.886	75.5096	267.981	1447.87	554.433	0.668143	Tt 24	24	5	1
79.4563	382.235	1186.38	488.584	82.5063	271.05	1558.06	460.169	0.726753	Tt 24	24	5	1
77.3388	370.818	1935.62	681.743	73.8886	275.441	2264.94	789.093	0.662436	Tt 24	24	5	1
78.3073	373.078	2289.22	695.367	71.7915	336.715	2609.73	961.241	0.675754	Tt 24	24	5	1
78.6444	380.942	1919.73	638.142	77.9007	230.37	1903.23	599.767	0.609671	Tt 24	24	5	1
83.1241	404.44	2102.86	649.564	76.9131	270.428	2141.32	710.003	0.675269	Tt 24	24	5	1
81.5651	408.961	1808.32	579.533	79.2813	282.606	2049.87	644.055	0.676951	Tt 24	24	5	1
71.3489	374.679	1089.5	482.815	82.0569	287.136	1813.27	501.115	0.736883	Tt 24	24	5	1
82.7414	402.144	1584.37	545.939	79.1868	285.401	1884.41	630.389	0.682679	Tt 24	24	5	1
72.1798	381.112	2069.21	742.392	66.26	317.026	2722.94	1124.02	0.732019	Tt 24	24	5	1
76.6882	451.316	2246.41	767.175	72.1137	289.325	2570.3	923.517	0.724926	Tt 24	24	5	1
79.0223	357.061	2284.44	682.099	70.5342	281.685	2641.71	977.047	0.72141	Tt 24	24	5	1
76.7932	272.114	1690.08	556.005	81.4946	168.551	1814.88	472.401	0.451743	Tt 24	24	5	1
40.883	580.04	1975.12	1384.2	70.3066	136.435	1667.51	588.67	0.418652	Tt 24	24	5	1
70.8954	422.208	2264.83	857.22	66.3685	443.129	2973.79	1256.48	0.699152	Tt 24	24	5	1
83.8515	396.952	1808.3	577.042	80.8578	274.265	1733.3	546.218	0.664446	Tt 24	24	5	1
85.2058	425.073	1555.27	512.075	84.648	293.266	1721.69	511.149	0.680281	Tt 24	24	5	1
88.0294	418.667	1527.27	500.827	83.9149	284.72	1559.41	485.963	0.685324	Tt 24	24	5	1
82.1626	419.075	1406.06	526.601	79.868	277.387	1512.73	538.225	0.670885	Tt 24	24	5	1
85.9853	415.798	1926.25	596.597	79.6638	277.247	2127.69	655.025	0.684068	Tt 24	24	5	1
77.3132	413.151	1848.29	670.197	76.226	347.955	2486.88	841.809	0.681775	Tt 24	24	5	1
59.4962	614.361	2211.81	1101.3	63.0807	311.773	2460.75	1096.53	0.617864	Tt 24	24	5	1
71.992	461.256	2545.36	933.714	68.1395	289.895	2559.18	1002.74	0.687903	Tt 24	24	5	1
76.7132	418.096	2330.09	790.352	64.1125	257.05	2551.82	1074.07	0.749897	Tt 24	24	5	1
73.7983	442.769	2402.29	859.281	69.7587	291.673	2544.69	961.558	0.700758	Tt 24	24	5	1
80.5034	411.302	1910.16	641.533	76.534	300.338	2257.43	763.139	0.721074	Tt 24	24	5	1
74.3191	406.14	2164.38	766.48	71.8879	386.917	2635.93	1002.79	0.653901	Tt 24	24	5	1
78.8031	403.382	1877.8	654.675	74.3654	271.165	2033.93	713.489	0.649101	Tt 24	24	5	1
80.1025	379.302	1993.02	643.236	74.9879	294.576	2349.94	812.592	0.671757	Tt 24	24	5	1
77.4291	399.663	2035.35	702.323	75.5533	314.752	2306.99	800.302	0.65197	Tt 24	24	5	1
43.2137	629.424	1988.72	1357.64	70.5092	176.712	1811.59	657.444	0.456127	Tt 24	24	5	1
83.8702	392.007	1498.49	523.89	80.785	262.374	1722.43	539.818	0.652073	Tt 24	24	5	1
77.4007	434.419	2085.24	735.228	72.4901	289.159	2313.33	846.843	0.71716	Tt 24	24	5	1
50.6568	1277.92	1930.93	1497.02	74.4459	630.731	2416.62	1075.51	0.372515	Tt 24	24	5	1
79.4767	416.944	2034.8	652.24	71.9497	286.148	2352.15	869.738	0.704174	Tt 24	24	5	1
80.7894	417.163	1731.23	607.44	78.0929	297.448	2057.95	691.321	0.766637	Tt 24	24	5	1
68.9086	576.508	1858.23	911.166	77.4062	212.28	1693.54	550.998	0.552542	Tt 24	24	5	1
83.3735	408.026	1796.77	588.579	77.7492	274.496	1882.27	644.343	0.678472	Tt 24	24	5	1
73.2518	436.811	2318.35	847.491	69.7566	326.081	2536.16	988.964	0.691288	Tt 24	24	5	1
86.3891	398.187	1505.52	504.759	83.1302	274.815	1621.85	494.368	0.670415	Tt 24	24	5	1
62.2618	560.984	1927.42	1009.57	78.1739	211.541	1613.92	514.921	0.467226	Tt 24	24	5	1
79.2069	434.947	2255.57	729.08	72.6154	306.535	2310.47	855.154	0.711835	Tt 24	24	5	1
81.6091	262.829	1509.08	452.457	76.9004	342.7	2340.42	793.14	0.70377	Tt 24	24	1	2	100
81.0426	234.928	1249.04	389.597	79.7387	291.364	1971.84	626.967	0.707784	Tt 24	24	1	2
84.838	168.958	1434.86	336.815	75.3205	740.789	3651.26	1378.44	0.685052	Tt 24	24	1	2
84.993	299.686	1401.63	426.828	79.4415	244.288	1488.88	495.268	0.675916	Tt 24	24	1	2
81.7733	212.46	1409.16	400.663	74.0747	156.735	2244.2	699.891	0.730387	Tt 24	24	1	2
82.5876	205.881	1302.46	374.386	80.4524	176.655	1915.95	529.079	0.59399	Tt 24	24	1	2
79.4955	300.775	1713.56	522.55	77.0049	696.045	3245.97	1230.63	0.703114	Tt 24	24	1	2
83.4675	211.769	1240.69	352.134	80.4401	539.512	2488.64	919.362	0.616865	Tt 24	24	1	2
80.2578	305.071	1575.96	497.414	75.0361	339.928	2152.01	784.15	0.67386	Tt 24	24	1	2
73.7783	338.635	1823.2	665.749	67.9137	300.218	2094.47	862.544	0.713789	Tt 24	24	2	2
84.2196	331.277	1504.45	470.456	81.9157	292.8	1928.12	581.024	0.711383	Tt 24	24	2	2
80.5252	217.004	1242.05	397.7	80.5775	400.776	1480	583.636	0.442596	Tt 24	24	2	2
75.3539	371.398	2148.57	710.412	72.9491	773.616	3485.64	1448.65	0.678223	Tt 24	24	2	2
73.5878	330.32	2254.21	711.785	64.2658	838.792	4216.05	1782.71	0.703994	Tt 24	24	2	2
75.538	353.306	2334.83	753.203	67.3797	767.086	3954.39	1616.01	0.673797	Tt 24	24	2	2
70.6803	254.588	2070.47	725.666	69.7991	321.923	2610.67	998.69	0.654395	Tt 24	24	2	2
80.4127	212.56	1442.25	409.317	76.0324	303.928	2259.78	772.258	0.704302	Tt 24	24	2	2
76.5334	158.514	1575.21	483.891	79.5887	137.589	1879.6	492.267	0.599589	Tt 24	24	2	2
82.2763	236.349	1870.03	460.339	74.7536	325.896	2897.92	923.264	0.675443	Tt 24	24	2	2
78.6645	214.427	1519.32	457.012	70.3857	296.77	2223.9	868.19	0.724523	Tt 24	24	2	2
82.1694	218.322	1293.56	363.294	83.7064	289.659	1772.04	525.388	0.701211	Tt 24	24	2	2
82.3216	340.921	1166.35	449.611	82.9753	258.08	1462.35	446.887	0.68085	Tt 24	24	2	2
84.7443	231.378	1230.13	354.073	84.7445	171.624	1362.62	348.961	0.544062	Tt 24	24	2	2
86.0677	332.551	1751.43	506.724	81.2308	244.013	1583.37	490.152	0.627138	Tt 24	24	2	2
83.5917	337.887	1601.63	505.093	79.6908	217.883	1481.85	464.874	0.645359	Tt 24	24	2	2
81.0517	360.864	1706.37	554.374	77.7495	272.368	2038.88	664.636	0.709208	Tt 24	24	2	2
83.0686	360.394	1864.7	571.467	80.3759	247.108	2070.65	603.468	0.673089	Tt 24	24	2	2
84.0133	284.975	1479.99	439.22	78.8467	210.722	1813.7	546.38	0.65346	Tt 24	24	2	2
79.3163	289.225	1552.6	509.871	65.0488	191.27	2271.41	929.342	0.782365	Tt 24	24	2	2
78.4542	260.226	1439.57	495.247	82.4345	157.043	1569.6	407.301	0.518234	Tt 24	24	2	2
80.0585	328.605	1398.09	469.22	83.4556	527.769	2416.61	806.755	0.64541	Tt 24	24	2	2
81.4855	378.821	1750.48	582.533	76.3163	554.552	2530.63	996.48	0.639284	Tt 24	24	2	2
77.9345	460.072	1694.79	627.188	79.6153	688.211	2970.23	1125.46	0.705232	Tt 24	24	2	2
83.2358	235.391	1444.58	411.281	78.1267	265.445	2053.12	662.526	0.670001	Tt 24	24	2	2
81.9206	231.567	1381.3	398.033	81.4368	283.78	2145.19	621.717	0.678856	Tt 24	24	2	2
80.9664	299.294	1755.48	528.777	81.4348	1002.17	4003.45	1528.51	0.675957	Tt 24	24	3	2
76.9246	352.393	2176.09	689.333	78.7741	1229.35	4551.24	1813.6	0.686744	Tt 24	24	3	2
85.2215	111.872	954.497	224.105	81.9599	218.835	1687.86	484.266	0.584676	Tt 24	24	3	2
78.7804	203.231	1085.55	347.158	82.3833	310.111	1778.25	547.714	0.690886	Tt 24	24	3	2
81.9061	214.912	1447.15	408.566	76.4693	318.402	2138.81	743.626	0.680406	Tt 24	24	3	2
83.1684	164.157	1391.93	358.457	74.1719	335.598	2562.36	906.902	0.650069	Tt 24	24	3	2
78.1393	473.976	1918.52	694.642	75.1738	371.853	2196.51	828.775	0.707988	Tt 24	24	3	2
78.7372	438.959	1857.22	655.261	75.8305	314.462	2099.95	746.136	0.692382	Tt 24	24	3	2
80.5113	344.438	1742.2	571.612	76.6688	652.417	2906.19	1136.42	0.715172	Tt 24	24	3	2
78.4004	335.434	1749.38	574.011	78.3123	692.64	3151.62	1157.31	0.707056	Tt 24	24	3	2
82.016	292.406	1553.82	473.279	82.8454	639.893	3010.18	1037.39	0.70598	Tt 24	24	3	2
78.6345	179.936	1219.59	322.741	82.0253	317.596	2456.16	574.368	0.905595	Tt 24	24	3	2
81.5544	215.477	1202.81	352.66	82.9031	289.959	1702.73	523.627	0.693832	Tt 24	24	3	2
80.9772	214.481	1312.11	377.79	77.9965	291.953	2105.27	693.008	0.719691	Tt 24	24	3	2
79.6032	177.979	1067.85	319.16	80.3321	282.722	1642.69	545.721	0.70208	Tt 24	24	3	2
74.1594	255.71	1946.13	629.74	66.8271	491.853	2614.64	1167.49	0.708594	Tt 24	24	3	2
79.9328	215.21	1451.17	433.038	74.1162	291.386	2120.14	758.294	0.704163	Tt 24	24	3	2
74.0255	201.319	1637.74	541.299	63.3269	403.085	2725.75	1232.74	0.728736	Tt 24	24	3	2
82.9156	239.694	1261.93	375.9	83.4387	288.041	1942.14	559.324	0.712163	Tt 24	24	3	2
80.5457	241.35	1491.17	444.398	69.1402	303.915	2318.46	917.977	0.733841	Tt 24	24	3	2
86.6771	125.528	1198.75	248.57	79.5679	334.428	2378.03	742.46	0.717841	Tt 24	24	4	2
85.2819	144.143	1183.67	278.223	78.0682	329.747	2265.24	741.317	0.713404	Tt 24	24	4	2
85.5539	136.338	1275.8	291.471	76.0307	365.57	2647.41	905.95	0.729442	Tt 24	24	4	2
85.1321	95.1187	1038.65	232.397	74.7378	348.842	2378.95	858.128	0.710635	Tt 24	24	4	2
81.4494	245.757	1480.06	428.877	78.3895	327.297	2202.58	721.416	0.695492	Tt 24	24	4	2
80.8969	155.735	951.439	256.663	79.2903	259.483	1823.79	501.671	0.60412	Tt 24	24	4	2
78.9	226.682	1578.49	467.559	72.0065	351.925	2546.77	947.607	0.675079	Tt 24	24	4	2
81.8101	246.177	1399.34	422.337	76.2248	314.427	1905.84	691.532	0.686682	Tt 24	24	4	2
81.337	280.574	1684.39	489.911	75.2335	351.288	2498.62	873.434	0.727246	Tt 24	24	4	2
77.9907	292.709	1617.96	526.452	74.2119	292.051	2246.56	779.338	0.620288	Tt 24	24	4	2
74.3118	301.423	1892.14	652.875	70.9102	341.927	2840.87	1057.95	0.695753	Tt 24	24	4	2
79.5975	272.767	1636.68	498.62	74.7861	349.014	2391.06	854.627	0.646698	Tt 24	24	4	2
84.1885	183.886	1388.78	347.867	73.1567	265.65	2587.93	875.949	0.631301	Tt 24	24	4	2
80.0642	267.43	1514.28	471.925	77.5233	312.758	2242.72	746.351	0.651425	Tt 24	24	4	2
80.1184	253.449	1690.36	486.285	73.1426	395.661	2852.8	1027.99	0.664868	Tt 24	24	4	2
81.2713	224.219	1405.14	420.935	75.216	245.893	2146.77	709.266	0.666165	Tt 24	24	4	2
82.2101	299.519	1609.53	496.42	78.0055	287.286	1874.81	636.529	0.678592	Tt 24	24	4	2
80.982	214.649	1252.78	391.498	77.6586	223.335	1886.21	604.245	0.546407	Tt 24	24	4	2
81.7334	382.855	2021.91	638.575	74.5792	309.503	2216.45	787.91	0.671657	Tt 24	24	4	2
83.1163	278.962	1827.75	503.595	78.9154	264.323	2584.42	742.664	0.687618	Tt 24	24	4	2
79.763	329.323	2118.32	601.305	73.7785	276.716	2381	818.645	0.685096	Tt 24	24	4	2
81.1541	315.004	1784.88	555.935	76.5294	309.165	2097.95	725.763	0.644194	Tt 24	24	4	2
79.7459	266.64	1538.73	500.794	77.6342	221.481	1840.77	584.62	0.593901	Tt 24	24	4	2
81.4204	291.511	1677.68	526.739	75.5375	260.765	1969.45	690.908	0.615408	Tt 24	24	4	2
81.3706	254.057	1313.14	429.471	79.0485	244.623	1746.21	560.107	0.600623	Tt 24	24	4	2
79.3044	330.313	1681.59	552.1	78.0682	271.193	2219.76	691.972	0.648046	Tt 24	24	4	2
80.0347	201.628	1346.35	386.387	77.3669	244.501	1956.28	633.558	0.710513	Tt 24	24	4	2
82.3375	195.599	1274.49	347.856	79.1225	436.985	2380.64	831.639	0.702818	Tt 24	24	4	2
83.1703	204.953	1353.05	369.404	80.2768	435.349	2546.11	840.006	0.712423	Tt 24	24	4	2
85.2744	199.356	1232.28	329.241	79.8124	407.861	2573.51	831.89	0.715251	Tt 24	24	4	2
81.3973	190.617	1246.51	350.203	81.2341	159.657	1741.43	458.392	0.705585	Tt 24	24	5	2
85.8373	336.413	1483.23	462.858	81.9369	294.05	1721.76	540.366	0.706607	Tt 24	24	5	2
77.5197	365.805	2050.15	660.695	73.4897	319.33	2386.67	865.567	0.694599	Tt 24	24	5	2
81.5143	321.898	1576.61	505.089	78.9462	300.291	2120.12	679.333	0.701323	Tt 24	24	5	2
78.9502	381.407	1860.81	624.924	73.9109	382.083	2366.92	882.896	0.70505	Tt 24	24	5	2
83.8695	400.343	1791.14	575.002	79.4687	380.579	2329.51	764.838	0.669847	Tt 24	24	5	2
77.832	308.527	1997.36	624.107	74.7318	358.367	2390.11	875.458	0.680185	Tt 24	24	5	2
81.1558	235.127	1559.09	448.838	75.6085	347.496	2174.34	790.547	0.682409	Tt 24	24	5	2
80.984	189.44	1428.44	394.865	74.8472	313.936	2280.56	799.528	0.660255	Tt 24	24	5	2
60.9134	304.958	1874.38	824.223	59.8099	431.101	3098.9	1348.35	0.605847	Tt 24	24	5	2
85.9957	161.215	1988.58	399.172	59.7222	530.129	3306.26	1578.14	0.741459	Tt 24	24	5	2
87.1408	129.321	2110.08	352.9	63.156	453.854	3260.19	1469.25	0.718677	Tt 24	24	5	2
87.9144	62.9284	683.068	130.638	84.3942	291.271	1529.04	459.008	0.675932	Tt 24	24	5	2
81.8116	291.012	1430.63	453.521	80.1683	214.722	1711.86	501.645	0.636886	Tt 24	24	5	2
78.1901	244.927	1289.11	416.885	80.6867	203.664	1641.39	475.092	0.623579	Tt 24	24	5	2
82.1632	339.5	1339.18	476.584	81.4444	293.423	2328.77	675.802	0.723543	Tt 24	24	1	3	60
74.9911	439.483	2269.76	782.894	69.136	357.619	3004.23	1149.06	0.800782	Tt 24	24	1	3
73.7818	421.311	1927.16	740.233	68.3574	416.256	2882.21	1183.93	0.823435	Tt 24	24	1	3
71.1204	542.781	1953.34	822.071	68.9839	434.5	2875.1	1188.48	0.836055	Tt 24	24	1	3
70.9559	493.782	1892.21	810.431	71.2304	453.032	2934.75	1143.17	0.776009	Tt 24	24	1	3
78.4195	385.495	1747.43	584.658	74.7979	385.459	2995.61	1025.41	0.760761	Tt 24	24	1	3
77.0627	432.444	2084.15	715.826	71.9278	355.276	2778.76	1020.8	0.824035	Tt 24	24	1	3
76.9449	461.523	1730.43	663.397	76.5636	374.404	2879.3	927.174	0.810226	Tt 24	24	1	3
70.9681	559.634	2461.97	959.92	73.5	518.45	3625.85	1282.88	0.8435	Tt 24	24	1	3
75.6951	538.538	2133.19	812.427	74.1585	446.955	3163.55	1120.13	0.867866	Tt 24	24	1	3
74.3992	498.905	2439.89	821.688	71.995	399.588	3057.11	1113.96	0.838348	Tt 24	24	2	3
77.1294	442.031	1764.4	659.462	75.0375	367.708	2850.61	969.04	0.8251	Tt 24	24	2	3
75.8017	510.075	1677.6	701.936	75.7844	378.13	2591.62	905.751	0.84544	Tt 24	24	2	3
76.4376	446.854	1651.1	658.515	77.3073	375.832	2680.29	889.091	0.815589	Tt 24	24	2	3
78.1375	400.84	1726.23	642.656	76.1923	303.714	2369.1	818.716	0.76247	Tt 24	24	2	3
82.2243	308.525	1276.63	444.149	84.4327	264.372	2222.35	564.392	0.715909	Tt 24	24	2	3
80.4739	460.006	2020.75	698.504	75.3713	365.493	2851.59	976.01	0.842906	Tt 24	24	2	3
78.8684	340.965	1772.63	597.673	77.1045	300.345	2698.27	855.208	0.746361	Tt 24	24	2	3
74.4673	488.019	1650.57	685.796	79.265	373.346	2716.3	837.779	0.831034	Tt 24	24	2	3
77.0494	416.901	1626.91	613.005	75.3218	343.114	2844.5	948.148	0.830394	Tt 24	24	3	3
85.706	279.527	1409.87	408.765	85.5156	254.721	2122.06	528.851	0.70365	Tt 24	24	3	3
80.1352	333.96	1369.97	480.494	82.2361	319.441	2403.84	682.021	0.77398	Tt 24	24	3	3
79.0368	413.724	1802.75	606.77	74.0733	336.711	2548.18	903.057	0.794828	Tt 24	24	3	3
82.503	442.601	3950.38	1006.47	74.8403	303.801	2685.09	903.16	0.796388	Tt 24	24	3	3
76.4979	417.095	1810.96	662.386	72.4142	377.712	2827.52	1041.36	0.799073	Tt 24	24	3	3
80.3274	342.652	1623.52	534.362	77.3626	306.409	2697.09	850.671	0.765225	Tt 24	24	3	3
76.8699	414.978	1756.89	646.26	73.1354	328.335	2783.43	984.331	0.821339	Tt 24	24	3	3
73.9479	470.816	2109.71	793.778	66.3189	391.581	2989.31	1241.74	0.826832	Tt 24	24	3	3
78.193	413.289	1887.35	648.411	74.4741	336.111	2677.27	911.319	0.816056	Tt 24	24	4	3
79.1939	378.818	1635.25	580.31	75.596	321.27	2591.26	868.076	0.803433	Tt 24	24	4	3
72.4555	517.666	2273.16	859.195	66.8816	392.73	2715.03	1139.2	0.825117	Tt 24	24	4	3
79.853	397.046	1710.4	614.384	73.2955	288.512	2535.3	896.789	0.778393	Tt 24	24	4	3
75.3596	443.652	1764.92	665.69	78.3595	367.713	2653.24	851.747	0.833235	Tt 24	24	4	3
77.2444	430.829	1657.7	629.251	74.753	375.436	2773.71	968.6	0.838047	Tt 24	24	4	3
79.234	434.116	1693.82	618.22	76.9535	342.857	2711.37	884.384	0.830802	Tt 24	24	4	3
68.2894	483.639	2336.2	904.143	64.684	451.855	3086.34	1352.1	0.800581	Tt 24	24	4	3
78.3311	391.894	1615.81	602.905	79.7538	288.557	2469.89	720.225	0.766021	Tt 24	24	4	3
77.8678	367.004	1615.07	590.969	70.7156	313.504	2361.87	908.827	0.788875	Tt 24	24	4	3
76.0124	459.748	1879.43	709.959	69.2269	341.539	2688.88	1045.68	0.81133	Tt 24	24	4	3
74.995	355.421	1284.53	531.265	81.7298	315.114	2518.93	690.279	0.802973	Tt 24	24	5	3
74.776	487.593	1820.51	727.528	75.1531	374.632	2787.67	964.257	0.84169	Tt 24	24	5	3
74.3241	430.477	1405.39	578.458	80.4451	373.328	2671.6	814.135	0.847385	Tt 24	24	5	3
77.1363	434.527	1648.7	610.585	76.1159	345.862	2661.49	890.756	0.839946	Tt 24	24	5	3
74.9188	409.341	1422.81	553.789	81.0503	349.778	2633.44	769.349	0.842315	Tt 24	24	5	3
74.3516	433.97	1850.26	713.119	70.3922	366.864	2724.36	1039.69	0.778231	Tt 24	24	5	3
80.0295	321.46	1611.63	535.593	80.1141	306.997	2573.27	751.461	0.720362	Tt 24	24	5	3
74.0488	398.815	1011.19	471.355	85.8075	374.453	2478.73	661.065	0.827927	Tt 24	24	5	3
74.7281	370.196	1539.08	552.963	79.7231	331.335	2586.44	789.587	0.801737	Tt 24	24	5	3
79.6712	358.097	1663.98	553.357	77.0812	271.931	2603.21	788.09	0.716629	Tt 24	24	5	3
78.0525	445.705	1773.61	646.627	76.6697	358.783	2710.23	894.587	0.829922	Tt 24	24	5	3
81.4307	320.421	1539.48	515.434	79.2064	243.632	2237.95	659.378	0.716268	Tt 24	24	6	3
62.7119	693.92	2403.94	1115.99	66.2934	478.571	3111.28	1340.87	0.798188	Tt 24	24	6	3
74.6923	524.496	1945.54	756.462	75.5546	409.378	2830.72	985.55	0.839992	Tt 24	24	6	3
80.402	354.509	1565.75	511.213	76.5172	328.179	2793.96	902.678	0.804235	Tt 24	24	6	3
75.7378	417.833	2109.41	741.484	74.0182	346.694	3224.03	1044.36	0.769063	Tt 24	24	6	3
79.7974	381.879	1791.84	596.279	77.221	348.08	2689.93	877.009	0.812953	Tt 24	24	6	3
80.9051	420.961	1444.83	546.288	82.4928	337.729	2498.17	713.656	0.83352	Tt 24	24	6	3
78.6801	402.351	1792.87	632.311	71.895	330.821	2764.7	1001.8	0.831533	Tt 24	24	6	3
77.6209	427.474	1636.59	598.725	77.6159	334.632	2702.13	859.751	0.828803	Tt 24	24	6	3
78.6021	411.06	1574.95	567.359	81.3609	349.164	2547.19	749.168	0.844074	Tt 24	24	6	3
79.3104	296.211	1900.27	577.995	74.1562	326.461	2562.11	881.593	0.765676	Tt 72	72	1	1	81
79.4776	324.154	1799.11	555.617	72.681	305.383	2303.51	851.626	0.71874	Tt 72	72	1	1
80.4996	310.269	1516.43	465.095	82.038	354.467	2548.35	726.355	0.779665	Tt 72	72	1	1
78.2099	359.118	2240.86	693.989	68.358	385.363	3001.14	1178.84	0.742432	Tt 72	72	1	1
74.1523	318.929	2078.56	696.805	59.1449	415.453	2722.91	1319.15	0.720613	Tt 72	72	1	1
81.8894	308.078	1741.62	519.739	75.0873	304.816	2161.23	760.55	0.71241	Tt 72	72	1	1
78.4796	276.909	1786.07	560.419	72.858	365.821	2694.9	1002.61	0.713253	Tt 72	72	1	1
71.7424	300.38	1737.13	653.897	63.3493	461.578	2911.37	1346.48	0.740449	Tt 72	72	1	1
82.4516	279.892	1622.67	494.856	78.1037	299.726	2186.17	720.491	0.655854	Tt 72	72	1	1
70.9634	309.922	2046.09	737.148	66.7917	550.743	3081.17	1337.21	0.721081	Tt 72	72	1	1
71.7333	377.289	2077.14	779.372	69.9472	595.637	3155.85	1339.27	0.737242	Tt 72	72	1	1
77.1984	311.847	1787.93	570.649	68.4061	513.566	3115.52	1306.31	0.744799	Tt 72	72	1	1
73.6954	325.564	1996.22	700.541	66.5102	326.03	2561.75	1059.17	0.727414	Tt 72	72	1	1
77.6792	300.283	1865.37	586.945	72.7286	336.693	2620.58	945.298	0.727358	Tt 72	72	1	1
73.8072	293.08	1679.52	555.033	72.0366	285.752	2612.41	925.155	0.726328	Tt 72	72	1	1
83.7993	345.719	2116.33	550.372	77.2628	339.336	2606.7	842.114	0.73613	Tt 72	72	1	1
80.0743	241.542	1996.21	563.67	70.6631	279.18	2650.07	952.696	0.714319	Tt 72	72	1	1
78.5937	317.369	1840.63	590.158	75.4811	329.094	2372.65	836.965	0.716694	Tt 72	72	1	1
80.8374	305.71	1455.78	488.389	81.6712	433.587	2905.84	827.134	0.920666	Tt 72	72	1	1
76.8186	279.9	1852.4	598.992	67.1519	341.319	2590.62	1081.44	0.737389	Tt 72	72	1	1
78.7543	324.88	1727.71	564.331	72.8557	301.134	2274.4	835.224	0.712746	Tt 72	72	1	1
70.065	352.809	1927.47	753.994	65.7322	443.326	2955.54	1213.98	0.736027	Tt 72	72	1	1
81.3106	327.108	1625.17	523.254	76.9904	302.314	2285.21	717.063	0.740973	Tt 72	72	2	1
75.4403	361.885	1865.9	603.505	70.06	305.843	2382.1	922.632	0.7401	Tt 72	72	2	1
70.2797	383.399	2103.25	788.598	62.5546	461.456	2927.76	1370.25	0.786512	Tt 72	72	2	1
80.2325	289.179	1676.12	492.397	77.4366	351.21	2498.59	813.158	0.7486	Tt 72	72	2	1
81.2624	346.443	1793.87	563.945	73.6444	357.025	2342.09	872.652	0.722601	Tt 72	72	2	1
78.8461	283.011	1581.84	495.648	76.8347	300.175	2237.3	738.37	0.703066	Tt 72	72	2	1
81.9363	256.634	1545.67	451.24	76.2222	283.14	2289.47	756.706	0.656943	Tt 72	72	2	1
82.2995	321.808	1890.57	542.916	73.7913	306.596	2411.65	846.306	0.738105	Tt 72	72	2	1
75.6762	341.769	1899.38	632.758	71.2739	358.386	3245.16	1097.74	0.753616	Tt 72	72	2	1
79.6544	360.012	1582.88	529.431	77.1942	333.039	2350.12	766.033	0.756685	Tt 72	72	2	1
79.2245	296.276	2032.85	610.64	73.0036	246.349	2498.99	851.167	0.678405	Tt 72	72	2	1
80.5821	245.567	1493	452.413	77.0305	249.599	2077.96	671.223	0.668397	Tt 72	72	2	1
80.7309	322.622	1473.77	492.168	79.1257	327.361	2834.14	680.155	0.781785	Tt 72	72	2	1
75.3095	313.212	1907.79	660.765	67.8502	343.924	2733.42	1058.11	0.718899	Tt 72	72	2	1
77.2933	364.884	1969.76	669.46	68.7104	346.771	2420.07	977.39	0.72699	Tt 72	72	2	1
79.3819	298.021	1745.35	543.07	73.4461	319.999	2551.96	903.759	0.828715	Tt 72	72	2	1
80.2806	323.047	1671.9	549.983	76.0837	314.999	2225.16	747.635	0.715218	Tt 72	72	2	1
77.8477	324.554	1865.8	606.686	71.49	361.404	2777.39	1029.15	0.733855	Tt 72	72	2	1
74.9029	367.816	2019.17	699.983	68.8605	433.144	2653.61	1103.52	0.729772	Tt 72	72	2	1
78.2881	346.069	1960.23	655.804	71.3479	331.029	2456.48	931.504	0.775241	Tt 72	72	2	1
77.8324	294.128	2053.6	634.164	66.3702	299.79	2565.67	1044.19	0.722062	Tt 72	72	2	1
83.1164	211.192	1449.95	395.705	80.0911	222.263	2365.33	659.386	0.639372	Tt 72	72	2	1
76.243	417.277	2554.84	866.684	62.5319	441.247	3099.79	1393.32	0.742247	Tt 72	72	2	1
60.9587	543.742	2369.62	1090.75	73.1502	771.611	3497.78	1484.76	0.583942	Tt 72	72	2	1
76.4009	302.327	2057.76	651.674	73.4176	401.642	2625.03	966.026	0.67327	Tt 72	72	2	1
68.7435	404.97	2297.96	897.284	72.0703	599.548	3723.21	1409.79	0.664311	Tt 72	72	2	1
73.9747	269.495	2211.31	691.906	76.26	530.835	3318.68	1167.01	0.62242	Tt 72	72	2	1
80.6735	287.382	1958.95	577.842	71.3743	348.045	2443.87	934.127	0.703741	Tt 72	72	2	1
70.6036	166.668	1542.78	559.837	75.359	124.786	1600.22	486.249	0.534441	Tt 72	72	2	1
54.7954	416.168	1987.85	1037.64	68.6283	563.331	2679.52	1201.81	0.540582	Tt 72	72	2	1
55.6421	505.595	1904.45	992.818	67.8148	489.458	2701	1172.83	0.539194	Tt 72	72	2	1
74.4908	342.376	2173.52	711.245	71.6586	299.88	2427.18	892.998	0.696777	Tt 72	72	2	1
83.9309	332.18	1580.75	478.733	81.935	334.697	1997.33	614.187	0.703124	Tt 72	72	2	1
79.9886	314.228	1363.43	461.575	80.7755	317.558	2112.52	611.911	0.669815	Tt 72	72	2	1
72.4144	352.589	2096.54	752.014	68.6064	429.686	2564.67	1115.92	0.699142	Tt 72	72	2	1
79.0463	254.87	1352.87	416.238	79.7308	350.806	2113.39	650.906	0.721682	Tt 72	72	2	1
76.5477	376.838	2096.47	723.636	70.2913	319.816	2390.78	932.004	0.721899	Tt 72	72	2	1
77.6987	321.912	1991.39	618.848	67.7949	657.769	3535.66	1491.69	0.797668	Tt 72	72	2	1
69.5674	396.119	2334.07	860.527	67.5774	597.625	3581.64	1484.12	0.7306	Tt 72	72	2	1
76.1075	327.439	1903.07	642.045	72.7654	369.388	2520.56	956.701	0.723359	Tt 72	72	2	1
73.758	339.391	2147.47	750.151	64.3503	486.664	2985.14	1353.57	0.735238	Tt 72	72	3	1
80.9542	284.72	1571.93	465.462	79.6444	444.166	2849.42	877.972	0.841904	Tt 72	72	3	1
77.9323	426.597	1625.54	643.111	78.3951	380.938	3075.69	783.941	0.987335	Tt 72	72	3	1
80.5975	321.412	1492.03	485.338	79.0326	373.825	4446.72	907.587	0.896536	Tt 72	72	3	1
79.5996	328.786	1367	490.002	80.8194	327.48	2064.22	637.044	0.812205	Tt 72	72	3	1
77.7695	323.665	2026.37	637.741	70.0238	634.237	3634.86	1481.21	0.793728	Tt 72	72	3	1
64.9505	455.458	2381.03	996.159	63.3069	518.231	3176.03	1459.56	0.674338	Tt 72	72	3	1
79.1871	383.592	1902.67	627.87	74.6043	466.304	2849.55	1049.35	0.755255	Tt 72	72	3	1
74.4095	333.985	1765.72	652.661	70.4742	514.122	2785.82	1163.03	0.746028	Tt 72	72	3	1
76.2614	316.217	1695.89	594.157	74.3367	443.981	2689	1005.32	0.699087	Tt 72	72	3	1
75.9348	298.338	2029.45	638.257	69.0837	478.715	3299.98	1257.57	0.730093	Tt 72	72	3	1
72.2863	439.264	2326.1	826.33	63.5438	912.3	4090.58	1950.67	0.846911	Tt 72	72	3	1
79.8874	344.164	1719.87	569.847	76.716	331.032	2041.19	695.338	0.877325	Tt 72	72	3	1
80.4009	324.527	1702.9	528.858	76.5254	319.176	2216.58	754.195	0.72523	Tt 72	72	3	1
73.6788	377.26	2078.82	730.103	65.5407	518.439	3212.94	1388.53	0.76416	Tt 72	72	3	1
66.5509	402.438	1979.48	821.647	63.5566	791.389	3385.87	1630.2	0.831569	Tt 72	72	3	1
79.4215	325.831	1793.59	579.354	74.7732	397.379	2621.33	931.034	0.767065	Tt 72	72	3	1
78.944	328.652	1770.08	570.236	72.3845	336.958	2352.26	879.283	0.719713	Tt 72	72	3	1
81.7346	351.38	1462.43	521.81	79.4356	328.928	2136.01	688.855	0.731993	Tt 72	72	3	1
86.8784	169.896	1995.96	369.937	63.1637	695.016	3800.24	1724.5	0.728888	Tt 72	72	1	2	64
93.7388	38.6293	1008.2	101.482	74.7372	207.303	2635.33	809.747	0.692955	Tt 72	72	1	2
84.9041	166.745	2004.61	420.11	72.8897	701.773	3751.45	1485.66	0.689387	Tt 72	72	1	2
82.6594	160.54	1089.62	288.933	79.7921	240.717	2024.78	586.082	0.710617	Tt 72	72	1	2
87.8937	109.4	1472.95	263.698	79.4519	446.524	3688.11	1109.76	0.653212	Tt 72	72	1	2
80.3542	449.274	1828.56	633.714	80.3955	706.647	3150.38	1149.01	0.781067	Tt 72	72	1	2
77.6307	385.232	1420.49	541.833	80.4492	689.491	3170.9	1130.5	0.761018	Tt 72	72	1	2
79.2745	198.136	1709.81	457.958	71.2769	422.168	2850.12	1078.57	0.726231	Tt 72	72	1	2
83.9647	133.591	1657.93	361.057	64.6926	324.869	2859.72	1183.25	0.749086	Tt 72	72	1	2
76.835	285.601	4747.84	1018.03	72.778	743.735	5999.18	1997.54	0.712657	Tt 72	72	1	2
82.3518	198.59	1524.97	404.146	74.5605	387.973	3879.1	1126.56	0.727915	Tt 72	72	1	2
84.4215	230.863	1876.98	438.89	75.1545	245.747	2561.74	824.732	0.756691	Tt 72	72	1	2
84.1127	157.141	1573.14	355.048	73.9927	264.819	2798.95	921.601	0.701365	Tt 72	72	1	2
81.0207	190.259	1236.7	340.611	80.5994	356.265	2639.71	711.197	0.813916	Tt 72	72	1	2
83.3224	179.21	1884.49	433.125	70.2432	490.546	3144.5	1256	0.754963	Tt 72	72	1	2
80.6072	152.654	1426.71	343.574	68.5783	303.152	2774.48	1059.6	0.752534	Tt 72	72	1	2
74.2364	562.351	1873.09	772.162	73.2392	307.891	2774.39	942.187	0.761019	Tt 72	72	1	2
67.4816	709.713	2828.35	1123.44	66.514	467.516	2918.1	1240.34	0.74919	Tt 72	72	1	2
78.4095	217.478	1714.64	510.086	68.0689	261.364	2592.69	991.288	0.735498	Tt 72	72	1	2
76.7129	314.557	1676.23	578.286	67.3192	426.349	3238.13	1336.31	0.752467	Tt 72	72	1	2
74.7172	401.176	2310.37	774.979	69.124	957.95	4227.03	1861.02	0.737473	Tt 72	72	1	2
83.6912	344.74	1661.13	504.224	78.7818	470.255	2680.02	915.29	0.726528	Tt 72	72	1	2
79.5979	301.44	1684.5	536.37	74.7129	457.714	2787.86	1028.65	0.699843	Tt 72	72	1	2
70.3477	478.245	2571.64	932.347	66.6835	518.153	2859.25	1273.53	0.719551	Tt 72	72	1	2
77.9622	399.873	1594.48	566.188	75.4081	266.191	2149.83	710.583	0.730894	Tt 72	72	1	2
77.8858	373.627	2085.17	660	73.5808	269.073	2531.29	869.552	0.720637	Tt 72	72	1	2
78.1576	457.846	1945.44	686.434	76.1233	296.381	2125.14	731.907	0.73184	Tt 72	72	1	2
67.9268	469.27	2497.71	996.394	65.9058	228.703	2557.46	1021	0.725702	Tt 72	72	1	2
77.5355	314.078	1953.08	579.326	72.401	403.07	3739.9	1248.1	0.736383	Tt 72	72	1	2
76.5631	346.551	2879.61	783.519	69.4514	573.138	3443.62	1391.14	0.737094	Tt 72	72	1	2
72.4292	349.866	1951.61	712.602	73.7328	379.752	2474.26	918.676	0.619599	Tt 72	72	1	2
70.6414	351.331	2167.17	794.764	70.7652	515.758	2590.07	1119.29	0.613724	Tt 72	72	1	2
75.7318	309.822	1936.83	663.338	68.7473	334.479	2635.5	1056.5	0.692354	Tt 72	72	1	2
76.9815	549.769	2333.84	827.013	71.0548	1443.93	4657.61	2039.68	0.741398	Tt 72	72	2	2
74.5676	409.76	1386.63	549.632	81.4557	624.608	3327.13	1031.16	0.748099	Tt 72	72	2	2
77.3753	392.576	1464.72	577.141	76.7619	541.915	3037.11	1002.4	0.785595	Tt 72	72	2	2
72.2901	468.985	2464.09	872.597	73.0762	718.223	4069.78	1448.61	0.784607	Tt 72	72	2	2
82.3682	353.115	1805.58	534.365	79.081	376.067	2585.32	829.476	0.739736	Tt 72	72	2	2
71.6125	697.086	3096.16	1068.27	72.3126	795.495	4062.15	1587.73	0.732288	Tt 72	72	2	2
69.1252	800.298	2153.35	1006.81	73.0947	745.436	3107.95	1320.7	0.735287	Tt 72	72	2	2
77.1805	508.717	2049.39	751.033	72.8278	390.052	3126.94	1080.89	0.76115	Tt 72	72	2	2
73.3177	421.29	1473.96	594.526	77.5983	405.084	2597.3	807.416	0.919197	Tt 72	72	2	2
73.7827	463.56	2228.68	832.42	73.2552	729.499	4522.58	1658.66	0.793901	Tt 72	72	2	2
72.6438	500.217	2194.5	851.992	80.156	540.788	3304.13	1101.35	0.719673	Tt 72	72	2	2
86.8784	169.896	1995.96	369.937	63.1637	695.016	3800.24	1724.5	0.728888	Tt 72	72	3	2
93.7388	38.6293	1008.2	101.482	74.7372	207.303	2635.33	809.747	0.692955	Tt 72	72	3	2
84.9041	166.745	2004.61	420.11	72.8897	701.773	3751.45	1485.66	0.689387	Tt 72	72	3	2
82.6594	160.54	1089.62	288.933	79.7921	240.717	2024.78	586.082	0.710617	Tt 72	72	3	2
87.8937	109.4	1472.95	263.698	79.4519	446.524	3688.11	1109.76	0.653212	Tt 72	72	3	2
80.3542	449.274	1828.56	633.714	80.3955	706.647	3150.38	1149.01	0.781067	Tt 72	72	3	2
77.6307	385.232	1420.49	541.833	80.4492	689.491	3170.9	1130.5	0.761018	Tt 72	72	3	2
79.2745	198.136	1709.81	457.958	71.2769	422.168	2850.12	1078.57	0.726231	Tt 72	72	3	2
83.9647	133.591	1657.93	361.057	64.6926	324.869	2859.72	1183.25	0.749086	Tt 72	72	3	2
76.835	285.601	4747.84	1018.03	72.778	743.735	5999.18	1997.54	0.712657	Tt 72	72	3	2
82.3518	198.59	1524.97	404.146	74.5605	387.973	3879.1	1126.56	0.727915	Tt 72	72	3	2
84.4215	230.863	1876.98	438.89	75.1545	245.747	2561.74	824.732	0.756691	Tt 72	72	3	2
84.1127	157.141	1573.14	355.048	73.9927	264.819	2798.95	921.601	0.701365	Tt 72	72	3	2
81.0207	190.259	1236.7	340.611	80.5994	356.265	2639.71	711.197	0.813916	Tt 72	72	3	2
83.3224	179.21	1884.49	433.125	70.2432	490.546	3144.5	1256	0.754963	Tt 72	72	3	2
80.6072	152.654	1426.71	343.574	68.5783	303.152	2774.48	1059.6	0.752534	Tt 72	72	3	2
74.2364	562.351	1873.09	772.162	73.2392	307.891	2774.39	942.187	0.761019	Tt 72	72	3	2
67.4816	709.713	2828.35	1123.44	66.514	467.516	2918.1	1240.34	0.74919	Tt 72	72	3	2
78.4095	217.478	1714.64	510.086	68.0689	261.364	2592.69	991.288	0.735498	Tt 72	72	3	2
76.7129	314.557	1676.23	578.286	67.3192	426.349	3238.13	1336.31	0.752467	Tt 72	72	3	2
79.4246	309.27	1624.64	520.71	73.2075	414.826	2969.17	1074.21	0.879203	Tt 72	72	1	3	68
77.2315	333.515	1704.46	569.686	72.5215	413.921	2834.52	1021.26	0.82738	Tt 72	72	1	3
73.2665	402.089	2037.56	752.952	64.8151	652.285	3265.38	1483.84	0.839182	Tt 72	72	1	3
80.6048	270.651	1312.27	425.245	77.7712	414.407	2899.32	947.324	0.841032	Tt 72	72	1	3
81.5702	234.046	1215.06	382.031	78.0884	357.642	2604.14	828.128	0.798816	Tt 72	72	1	3
76.2544	90.6915	725.182	233.512	73.0224	383.154	2803.58	1040.81	0.819875	Tt 72	72	1	3
79.669	249.508	1790.53	488.938	74.6011	380.517	2830.92	988.19	0.845372	Tt 72	72	1	3
82.6494	208.707	1317.08	375.365	78.9541	337.091	2744.27	843.116	0.765168	Tt 72	72	1	3
82.9869	145.654	1075.2	286.447	79.7148	294.035	2767.89	775.476	0.734449	Tt 72	72	1	3
76.7753	347.108	1529.48	532.278	75.4505	406.652	2842.73	985.147	0.856614	Tt 72	72	1	3
81.766	271.478	1430.08	426.829	71.3813	349.93	2718.33	1023.96	0.818476	Tt 72	72	1	3
77.677	270.537	1450.38	464.947	74.4999	459.727	3001.52	1078.67	0.876104	Tt 72	72	1	3
76.1665	394.977	2105.61	700.337	69.5154	587.261	3248.71	1375.14	0.850201	Tt 72	72	1	3
78.7779	118.733	765.138	251.632	86.5585	226.404	2324.86	508.468	0.741545	Tt 72	72	1	3
77.4903	353.336	1737.43	578.119	71.5233	449.624	3255.02	1199.88	0.848753	Tt 72	72	1	3
81.1703	201.143	1245.94	368.155	75.9289	326.706	2621.15	875.824	0.799056	Tt 72	72	1	3
82.6278	264.354	1576.17	440.381	76.5197	392.404	2799.01	930.775	0.859858	Tt 72	72	1	3
77.5785	295.441	1738.36	526.209	73.6618	424.097	3006.49	1078.29	0.855764	Tt 72	72	1	3
78.2553	330.821	1717.4	570.53	73.3037	442.123	2977.67	1104.3	0.866331	Tt 72	72	1	3
78.94	275.774	1561.18	489.235	73.1402	370.192	2719.7	984.992	0.828064	Tt 72	72	1	3
82.3647	185.91	1240.44	330.039	79.2273	286.139	2558.53	763.925	0.746177	Tt 72	72	2	3
79.1409	248.432	1410.38	437.548	74.9972	374.658	2790.44	962.453	0.819469	Tt 72	72	2	3
78.8037	289.073	1443.2	471.172	76.2721	386.877	2799.35	946.156	0.846146	Tt 72	72	3	3
76.5973	354.735	1726.93	600.412	68.7955	486.568	2996.12	1241.63	0.858618	Tt 72	72	3	3
79.8272	231.266	1743.21	472.94	75.5534	386.009	2921.31	992.338	0.828019	Tt 72	72	3	3
75.1071	361.524	1618.75	594.034	68.6226	385.174	2748.65	1097.36	0.816594	Tt 72	72	3	3
80.748	203.277	1361.06	398.11	78.802	331.541	2624.54	806.917	0.764219	Tt 72	72	3	3
78.0337	300.962	1451.82	491.629	73.384	348.273	2635.11	959.213	0.803777	Tt 72	72	3	3
77.8448	351.613	1705.21	565.346	72.4331	461.385	2984.46	1122.14	0.838708	Tt 72	72	3	3
76.2945	405.9	1764.92	636.453	69.5684	554.11	3333.15	1320.91	0.880416	Tt 72	72	3	3
79.6851	360.049	1594.98	551.194	67.4459	479.403	2655.44	1161.82	0.85835	Tt 72	72	3	3
79.4002	245.81	1259.57	419.499	78.6585	338.783	2565.15	812.514	0.794327	Tt 72	72	3	3
81.2818	224.056	1399.08	393.922	75.7626	357.8	3215.83	1029.16	0.794478	Tt 72	72	3	3
79.0429	275.441	1516.16	475.41	71.4994	427.39	2784.49	1090.48	0.807356	Tt 72	72	3	3
77.1147	379.567	1628.81	589.636	72.976	456.066	2862.21	1073.18	0.84986	Tt 72	72	3	3
83.8945	93.6528	923.665	217.815	88.0212	165.557	1657.01	340.024	0.519718	Tt 72	72	3	3
80.8136	122.448	1028.56	284.893	81.3827	192.12	1645.79	458.639	0.557641	Tt 72	72	3	3
78.8158	254.397	1873.17	557.617	72.1242	473.886	3624.43	1272.01	0.823603	Tt 72	72	4	3
77.0197	369.753	1862.18	635.4	66.4788	520.752	3202.89	1346.6	0.833297	Tt 72	72	4	3
81.045	199.343	1395.06	387.985	73.2653	332.377	2919.76	1009.69	0.784261	Tt 72	72	4	3
78.6967	297.837	1791.31	539.924	67.8947	440.461	2973.49	1226.68	0.833517	Tt 72	72	4	3
79.219	275.158	1697.22	507.331	68.0175	410.816	3212.96	1257.57	0.801426	Tt 72	72	4	3
78.794	268.375	1464.36	464.782	74.5373	365.058	2720.54	949.307	0.839521	Tt 72	72	4	3
81.3418	118.544	933.435	257.94	80.6602	275.019	2402.33	684.262	0.717499	Tt 72	72	4	3
80.3443	246.166	1388.01	430.575	77.0833	374.752	2798.98	909.558	0.810282	Tt 72	72	4	3
76.7598	241.816	1473.01	492.972	78.9829	396.353	2811.95	885.449	0.817123	Tt 72	72	4	3
79.9627	251.539	1337.92	418.225	77.0857	388.61	2772.4	922.596	0.835256	Tt 72	72	4	3
76.4578	348.125	1677.64	578.34	71.9188	427.046	3064.22	1123.39	0.842586	Tt 72	72	4	3
80.0285	265.81	1841.76	510.567	73.1377	437.685	3749.21	1245.48	0.822517	Tt 72	72	4	3
73.5432	210.263	1301.66	372.654	77.6678	378.523	2665.18	857.339	0.90998	Tt 72	72	4	3
78.3423	309.729	1522.84	498.107	77.2461	377.26	2802.92	906.438	0.856788	Tt 72	72	4	3
80.7879	255.21	1463.36	431.322	77.4111	352.779	2718.85	876.21	0.807695	Tt 72	72	4	3
79.3182	254.839	1485.94	466.491	74.5786	367.387	2809.8	964.837	0.821258	Tt 72	72	4	3
78.397	271.991	1831.95	539.279	69.1571	394.65	2968.13	1165.35	0.818355	Tt 72	72	4	3
81.5093	248.612	1499.09	444.722	74.3642	372.202	3041.88	1020.23	0.813574	Tt 72	72	4	3
80.3692	192.629	1284.73	364.712	80.0154	348.348	2599.94	799.729	0.793995	Tt 72	72	5	3
79.7574	274.36	1423.93	448.098	75.0013	408.151	2781.79	989.679	0.879579	Tt 72	72	5	3
82.4154	166.479	1130.08	316.942	77.8054	248.639	2427.2	736.102	0.705723	Tt 72	72	5	3
81.4268	229.968	1437.15	408.608	76.7945	380.312	2820.48	931.484	0.822967	Tt 72	72	5	3
80.0478	260.403	1456.82	438.574	77.1224	390.175	2823.28	918.993	0.853374	Tt 72	72	5	3
76.3974	349.73	1853.78	627.381	70.992	424.712	2678	1066.52	0.841684	Tt 72	72	5	3
75.7911	301.421	1795.84	585.868	67.4891	516.706	3094.5	1295.73	0.830656	Tt 72	72	6	3
83.5542	120.104	985.331	226.806	83.2228	304.689	2592	664.648	0.749999	Tt 72	72	6	3
78.6021	328.273	1792.02	553.055	74.4623	425.797	2777.54	1003.77	0.860204	Tt 72	72	6	3
80.9496	268.933	1479.41	450.563	77.0356	382.277	2799.79	927.847	0.849113	Tt 72	72	6	3
81.9839	137.529	1065.99	282.559	80.111	286.242	2555.36	740.268	0.767955	Tt 72	72	6	3
80.3823	288.563	1540.32	472.131	72.6463	380.026	2806.09	1027.48	0.841495	Tt 72	72	6	3
76.1532	315.938	1464.66	498.416	75.7018	430.294	3039.93	1031.14	0.875355	Tt 72	72	6	3
77.4224	362.878	1940.28	648.473	77.3458	393.667	2536.74	864.935	0.557889	Burn 24	24	1	1	464
78.1971	358.162	1858.5	595.434	77.2737	517.185	2939.58	1049.49	0.662803	Burn 24	24	1	1
78.9583	379.961	2041.28	651.259	78.4397	387.307	2382.25	790.362	0.58762	Burn 24	24	1	1
80.5579	290.336	1849.31	556.472	79.1573	277.655	2061.88	637.793	0.509968	Burn 24	24	1	1
76.4265	318.791	2155.23	696.294	75.3227	434.713	2831.32	1003.85	0.565578	Burn 24	24	1	1
77.8672	330.702	1987.97	636.071	77.7341	348.584	2524.74	824.789	0.565378	Burn 24	24	1	1
78.5627	324.679	1820.32	578.747	76.4689	222.535	1823.94	582.799	0.554883	Burn 24	24	1	1
81.667	386.503	1795.41	593.199	77.4356	292.051	1813.16	615.012	0.565082	Burn 24	24	1	1
76.042	369.857	1852.23	626.636	77.1992	334.773	2365.68	782.203	0.588084	Burn 24	24	1	1
79.8501	374.256	2437.97	687.592	75.3486	306.507	2165.38	763.347	0.608816	Burn 24	24	1	1
78.4549	344.047	1877.59	608.891	79.11	292.529	2153.99	667.985	0.531034	Burn 24	24	1	1
78.049	357.535	1833.76	606.947	78.717	307.143	2217.52	699.329	0.545665	Burn 24	24	1	1
79.5528	324.483	2043.93	634.09	75.8947	252.209	2239.87	723.571	0.550568	Burn 24	24	1	1
71.2959	358.288	2612.92	925.972	62.6911	288.433	2772.11	1200.02	0.599705	Burn 24	24	1	1
79.123	346.081	1898.66	620.348	77.2095	251	2048.22	657.649	0.590536	Burn 24	24	1	1
71.9944	472.367	2453.2	891.677	71.8863	413.741	2757.66	1059.11	0.605574	Burn 24	24	1	1
82.7483	296.732	1657.41	486.147	78.9414	232.504	2235.38	644.338	0.597862	Burn 24	24	1	1
76.7322	349.385	2006.95	677.946	75.4398	339.761	2430.1	849.281	0.57579	Burn 24	24	1	1
68.5488	307.744	1466.45	632.16	73.1955	174.905	1534.23	534.502	0.477665	Burn 24	24	1	1
78.247	345.652	2109.55	665.141	77.0885	371.278	2752.61	900.122	0.543304	Burn 24	24	1	1
77.892	339.37	1946.42	637.034	77.3771	254.752	2098.13	666.645	0.512773	Burn 24	24	1	1
76.664	320.328	1843.56	618.509	76.2044	372.2	2426.58	856.537	0.544075	Burn 24	24	1	1
74.4021	403.16	2489.21	827.605	73.7663	402.07	2911.7	1047.77	0.60513	Burn 24	24	1	1
80.8488	325.281	1866.96	569.525	79.3026	246.628	1973.35	606.031	0.578179	Burn 24	24	1	1
73.5758	369.532	2333.54	814.093	75.2997	275.965	2563.57	826.834	0.589237	Burn 24	24	1	1
72.7685	428.987	2418.13	877.501	71.3009	315.136	2593.05	962.585	0.602625	Burn 24	24	1	1
69.4627	315.407	2005.07	749.511	71.4489	433.572	2544.95	1032.67	0.61006	Burn 24	24	1	1
81.5139	372.28	2102.9	641.005	77.6124	273.472	2188.49	688.435	0.661863	Burn 24	24	1	1
83.0148	308.768	1738.77	510.37	79.9129	220.325	1895.19	552.329	0.578175	Burn 24	24	1	1
80.817	323.79	1721.95	548.777	78.5517	241.031	1966.37	607.513	0.5754	Burn 24	24	1	1
72.4633	475.65	2789.32	978.711	68.0814	360.27	2555.23	1047.49	0.591187	Burn 24	24	1	1
69.7541	394.592	1774.72	782.423	71.2991	178.929	1377.35	520.271	0.457227	Burn 24	24	1	1
78.4036	369.493	2013.29	669.32	77.7762	289.009	2114.36	683.272	0.588242	Burn 24	24	1	1
81.8692	295.368	1762.95	537.377	79.6029	211.136	1741.81	523.315	0.493448	Burn 24	24	1	1
80.2653	338.693	1864.59	591.015	77.6411	265.23	2075.26	663.465	0.549231	Burn 24	24	1	1
78.524	327.46	1830.6	615.434	78.1017	275.72	2217.04	688.91	0.585313	Burn 24	24	1	1
71.447	470.936	2683.22	932.975	75.2642	659.484	3272.98	1291.8	0.621978	Burn 24	24	1	1
75.7555	349.899	2214.54	728.558	73.2056	282.656	2333.07	824.96	0.617389	Burn 24	24	1	1
80.8102	381.809	2099.76	653.934	76.3499	279.121	2377.24	771.137	0.635947	Burn 24	24	1	1
78.0752	371.66	2125.11	679.109	78.7334	256.591	2207.69	662.374	0.632528	Burn 24	24	1	1
76.4732	391.817	2228.61	696.65	78.584	297.341	2236.95	704.97	0.640173	Burn 24	24	1	1
75.8148	393.035	2265.31	790.49	74.1702	297.907	2352.85	832.523	0.63918	Burn 24	24	1	1
80.8706	330.204	1834.96	564.48	77.0793	232.406	2146.45	672.402	0.634952	Burn 24	24	1	1
79.4581	387.73	2064.59	671.186	79.3861	272.11	2059.91	635.613	0.632543	Burn 24	24	1	1
78.6592	374.959	2079.5	670.95	75.4544	279.35	2190.33	754.142	0.612515	Burn 24	24	1	1
80.6271	330.76	1948.1	601.316	79.4037	212.646	1893.33	557.899	0.52801	Burn 24	24	1	1
79.1735	399.067	2332.51	723.309	75.4673	302.105	2308.77	786.662	0.62511	Burn 24	24	1	1
75.55	398.711	2310.4	793.961	72.4989	359.312	2353.9	899.051	0.616339	Burn 24	24	1	1
68.4477	394.073	2042.53	854.871	78.0785	229.763	2065.99	630.187	0.565603	Burn 24	24	1	1
84.3191	303.959	1910.55	540.463	74.6669	186.508	2233.55	713.473	0.653624	Burn 24	24	1	1
83.2739	409.311	2145.72	637.503	77.333	275.6	2052.02	673.232	0.653987	Burn 24	24	1	1
49.6037	1728.24	2094	1793.64	72.0576	754.522	2674.55	1273.26	0.312942	Burn 24	24	1	1
72.3627	391.764	2060.78	775.921	64.7969	224.15	2323.61	967.917	0.686781	Burn 24	24	1	1
77.9254	443.429	2225.05	773.247	71.5773	344.973	2439.98	929.698	0.698244	Burn 24	24	1	1
78.5381	346.476	1971.2	631.616	73.3778	326.721	2619.42	920.816	0.612892	Burn 24	24	1	1
75.0057	414.352	2250.13	788.585	71.1039	306.01	2435.29	911.819	0.665882	Burn 24	24	1	1
75.8536	326.57	1837.75	641.213	75.3127	236.349	2183.68	714.914	0.585201	Burn 24	24	1	1
77.5479	403.74	2339.89	766.653	70.7913	329.81	2346.15	907.041	0.673241	Burn 24	24	1	1
90.801	203.278	1550.1	323.747	78.2035	190.978	2159.62	620.59	0.473846	Burn 24	24	1	1
80.311	356.27	1815.78	582.356	77.7472	249.439	2042.55	648.009	0.649043	Burn 24	24	1	1
73.5246	319.591	1689.01	645.992	67.5566	134.972	2041.43	756.182	0.586582	Burn 24	24	1	1
83.6966	258.631	1607.15	460.933	79.6512	182.834	1938.47	547.945	0.610203	Burn 24	24	1	1
71.8686	333.682	2056.02	743.852	74.1697	301.592	2388.2	845.242	0.548347	Burn 24	24	1	1
81.8699	405.738	1987.94	614.035	79.7103	279.632	2076.96	639.021	0.652519	Burn 24	24	1	1
80.9278	352.123	1723.6	560.572	80.0599	223.492	1873.75	549.943	0.603046	Burn 24	24	1	1
79.6352	307.366	1656.01	547.321	81.1779	219.11	1982.8	548.093	0.566156	Burn 24	24	1	1
73.4268	355.192	2249.32	784.594	71.0904	304.622	2613.26	968.871	0.584474	Burn 24	24	1	1
78.7191	314.638	1711.41	549.815	79.776	200.14	1611.45	480.305	0.579487	Burn 24	24	1	1
78.7743	449.972	2520.64	784.817	74.7852	285.474	2225.38	763.518	0.653434	Burn 24	24	1	1
76.202	384.841	2235.31	744.801	72.6469	303.922	2468.39	888.011	0.622951	Burn 24	24	1	1
82.291	390.532	2039.27	629.567	80.1609	291.632	2112.13	637.685	0.666199	Burn 24	24	1	1
81.4689	407.371	2178.64	674.564	78.6438	303.223	2172.81	695.747	0.651399	Burn 24	24	1	1
79.2202	383.994	2206.1	710.38	75.0361	275.699	2229.65	765.618	0.605637	Burn 24	24	1	1
80.5199	390.009	2227.33	670.303	75.9468	273.054	2234.81	733.009	0.643315	Burn 24	24	1	1
77.0027	352.048	2084.85	671.642	72.0459	293.298	2653.03	950.167	0.614406	Burn 24	24	1	1
77.2255	347.843	1995.58	667.397	74.5194	290.44	2447.09	844.527	0.592669	Burn 24	24	1	1
78.0625	392.594	2557.41	792.75	74.8156	314.372	2523.31	866.158	0.62619	Burn 24	24	1	1
77.68	391.263	2454.98	745.847	72.6221	327.077	3182.13	1081.41	0.702748	Burn 24	24	1	1
80.8106	331.963	1966.09	600.747	71.7871	314.995	2558.77	939.576	0.67327	Burn 24	24	1	1
79.6768	345.661	1818.62	589.197	78.4553	226.505	1835.3	579.757	0.6019	Burn 24	24	1	1
80.3384	326.364	1802.09	573.734	77.3023	225.435	2061.14	639.443	0.591083	Burn 24	24	1	1
78.2275	331.995	1912.56	629.241	79.1477	208.388	1989.27	581.99	0.541275	Burn 24	24	1	1
80.3636	286.778	1688.52	527.947	80.3809	205.833	1949.46	549.363	0.553503	Burn 24	24	1	1
80.065	359.585	1915.02	614.837	79.1297	241.755	2042.37	616.589	0.595555	Burn 24	24	1	1
74.4694	476.685	2407.2	883.968	71.7543	375.126	2786.06	1044.93	0.645451	Burn 24	24	1	1
79.4819	330.448	1674.16	571.405	80.1695	226.829	1937.5	574.814	0.572501	Burn 24	24	1	1
76.3619	353.254	2117.92	705.224	73.8539	299.686	2454.81	862.151	0.569857	Burn 24	24	1	1
75.8164	406.548	2330.11	778.626	73.6497	314.054	2363.68	846.461	0.652334	Burn 24	24	1	1
75.3196	389.808	2380.32	786.046	59.8887	231.621	2726.28	1234.01	0.76244	Burn 24	24	1	1
80.8529	235.924	1570.32	462.477	69.4891	118.295	2377.3	803.946	0.750883	Burn 24	24	1	1
73.5632	368.181	2315.8	791.929	72.681	398.922	2747.04	1025.98	0.625631	Burn 24	24	1	1
78.0911	364.743	2056.43	679.347	75.9249	259.953	2354.64	760.379	0.604134	Burn 24	24	1	1
77.7385	379.265	2110.85	688.309	75.7943	279.74	2132.88	725.514	0.687198	Burn 24	24	1	1
78.0135	359.753	1668.01	605.549	78.5111	237.243	1785.53	571.83	0.60941	Burn 24	24	1	1
78.7167	353.216	2226.93	693.71	73.6689	253.143	2421.53	818.814	0.667337	Burn 24	24	1	1
76.2377	343.404	1817.81	629.403	71.3663	251.53	2439.68	877.892	0.67376	Burn 24	24	1	1
82.8681	308.926	1927.25	562.042	71.5518	269.378	2339.81	856.565	0.677236	Burn 24	24	1	1
83.2995	348.996	1648.72	533.728	79.5678	244.788	1831.22	569.255	0.626429	Burn 24	24	1	1
73.4793	404.048	2348.65	833.812	68.7986	336.062	2821.99	1087.73	0.673308	Burn 24	24	1	1
74.9257	441.419	2187.86	777.833	71.1984	342.078	2663.83	998.654	0.70672	Burn 24	24	1	1
78.1359	331.888	1793.87	596.797	77.6323	237.54	2292.13	689.052	0.585595	Burn 24	24	1	1
83.2492	405.392	1848.02	587.997	77.8383	266.376	1941.66	637.147	0.67894	Burn 24	24	1	1
79.289	362.718	2541.7	716.883	76.1299	244.244	2187.61	719.941	0.588074	Burn 24	24	1	1
82.6612	360.346	1716.59	565.636	79.9274	225.682	1593.3	492.496	0.614398	Burn 24	24	1	1
81.9962	333.132	1923.11	575.31	79.1508	225.845	2375.42	663.936	0.588317	Burn 24	24	1	1
79.3623	355.085	2085.51	653.863	77.8141	254.993	2230.75	690.603	0.616397	Burn 24	24	1	1
79.1903	410.077	2031.61	662.179	78.9752	288.736	2232.59	692.148	0.665352	Burn 24	24	1	1
74.4489	384.188	2291.42	791.455	70.3329	251.624	2661.39	946.644	0.671288	Burn 24	24	1	1
81.3271	296.138	1639.19	530.789	80.4132	177.522	1624.32	460.245	0.562895	Burn 24	24	1	1
77.8354	311.474	1805.88	599.421	77.6261	190.504	2048.06	603.736	0.584774	Burn 24	24	1	1
71.2445	423.418	2478.09	894.408	69.7773	430.33	2924.78	1159	0.653401	Burn 24	24	1	1
76.2279	456.238	2961.77	866.332	69.4854	317.019	2807.3	1058.01	0.731605	Burn 24	24	1	1
75.7794	451.121	1857.68	733.965	73.1126	354.28	2341.49	883.562	0.702123	Burn 24	24	1	1
77.7123	345.619	1834.23	627.097	79.1935	246.684	2000.16	617.618	0.580838	Burn 24	24	2	1
86.6018	416.083	1782.1	533.601	81.5356	285.344	1606.54	522.874	0.671264	Burn 24	24	2	1
74.6319	354.444	2291.79	771.831	68.7317	404.412	2654.08	1078.63	0.648043	Burn 24	24	2	1
78.2502	332.046	2143.84	687.683	75.1125	191.337	2198.27	690.685	0.604879	Burn 24	24	2	1
82.6784	261.185	1394.01	430.943	80.5392	188.559	1894.17	521.777	0.569878	Burn 24	24	2	1
79.4855	363.521	2347.26	713.785	73.4975	301.826	2427.63	857.741	0.610813	Burn 24	24	2	1
77.7737	364.065	2279.27	720.066	69.4683	260.686	2583.61	963.5	0.660334	Burn 24	24	2	1
81.8458	305.601	1683.74	512.053	81.6471	205.434	1953.4	526.52	0.593977	Burn 24	24	2	1
81.6316	345.59	2133.42	626.85	75.3698	265.011	2334.72	784.741	0.670628	Burn 24	24	2	1
77.2728	326.275	1815.46	607.997	76.1233	206.589	2151.31	670.347	0.596793	Burn 24	24	2	1
82.6325	318.112	1824.58	549.191	80.3817	204.38	1873.75	535.017	0.553318	Burn 24	24	2	1
77.2845	289.702	1672.37	559.075	78.5266	186.625	2056.4	590.464	0.526465	Burn 24	24	2	1
82.0653	345.588	1818.87	567.6	80.4859	235.786	2023.4	585.138	0.628267	Burn 24	24	2	1
80.0101	376.047	2326.14	722.677	77.7175	256.796	2031.99	650.463	0.628972	Burn 24	24	2	1
80.1332	290.868	1793.52	562.517	79.1344	209.748	1858.97	561.534	0.517128	Burn 24	24	2	1
39.8048	675.935	2014.7	1459.16	71.8016	388.476	2072.27	853.162	0.330968	Burn 24	24	2	1
79.2735	276.779	1743.78	551.399	78.8065	146.711	2077.83	577.268	0.505139	Burn 24	24	2	1
37.869	643.068	2072.73	1482.08	69.8456	367.513	2127.58	890.655	0.326898	Burn 24	24	2	1
40.0292	693.213	1993.23	1408.89	65.0927	424.771	2214.9	1033.75	0.38808	Burn 24	24	2	1
78.6626	306.271	1784.83	576.491	75.7284	277.073	2203.49	749.443	0.57452	Burn 24	24	2	1
76.6797	357.528	2016.8	693.375	74.7724	261.675	2219.78	755.892	0.587372	Burn 24	24	2	1
79.6696	329.433	1894.58	602.213	78.9416	227.03	1911.45	575.593	0.514346	Burn 24	24	2	1
78.6841	309.637	1848.1	596.627	77.527	225.21	2047.65	644.288	0.51841	Burn 24	24	2	1
77.0495	332.858	1981.64	665.974	75.9794	223.044	2115.19	677.105	0.534084	Burn 24	24	2	1
81.6158	319.516	1857.31	574.45	76.5792	255.44	2183.75	705.547	0.615203	Burn 24	24	2	1
78.9444	296.219	1728.81	564.577	79.3455	191.009	1900.71	544.346	0.513933	Burn 24	24	2	1
80.5743	276.118	1702.98	518.868	78.3762	193.727	2281.6	647.663	0.576997	Burn 24	24	2	1
80.0141	381.704	2315.5	713.315	76.0871	271.293	2421.48	780.163	0.647726	Burn 24	24	2	1
79.6047	375.745	2067.89	622.92	76.1998	280.123	2374.36	785.092	0.681895	Burn 24	24	2	1
83.4735	331.315	1882.89	559.396	77.666	261.667	2246.93	716.756	0.650258	Burn 24	24	2	1
82.6461	323.16	1701.05	531.514	80.2098	227.37	1756.71	521.535	0.566115	Burn 24	24	2	1
81.2301	263.649	1533.37	478.42	81.382	168.828	1662.03	442.918	0.40404	Burn 24	24	2	1
74.516	301.489	1903.44	647.924	75.2236	279.79	2378.64	791.678	0.529055	Burn 24	24	2	1
78.831	279.049	1647.2	539.027	80.2185	160.99	2010.35	525.12	0.515815	Burn 24	24	2	1
78.3195	309.665	2081.89	645.926	76.0687	257.884	2131.77	701.103	0.542088	Burn 24	24	2	1
79.5005	344.423	2340.68	705.157	73.6505	239.517	2230.43	758.098	0.583232	Burn 24	24	2	1
78.2684	325.122	2066.61	659.82	73.7329	272.143	2384.38	820.017	0.602032	Burn 24	24	2	1
79.9235	297.868	1755.5	538.133	77.8225	241.227	2172.24	663.222	0.57613	Burn 24	24	2	1
79.0807	341.67	2272.08	677.223	71.6846	276.829	2488.95	894.936	0.618026	Burn 24	24	2	1
80.2125	398.772	2010.36	645.506	77.6731	292.086	2079.08	688.605	0.639648	Burn 24	24	2	1
78.8355	368.939	2151.04	692.889	73.4793	293.253	2179.38	784.839	0.629811	Burn 24	24	2	1
76.5259	290.294	1863.67	610.687	75.595	347.009	2635.2	900.834	0.514557	Burn 24	24	2	1
78.9793	329.256	1990.57	625.913	75.6886	308.884	2289.46	787.935	0.557041	Burn 24	24	2	1
77.0623	262.489	1877.03	594.967	72.2086	326.045	2675.93	974.151	0.536946	Burn 24	24	2	1
78.7189	255.655	1758.88	546.741	75.7293	313.175	2487.41	834.516	0.504157	Burn 24	24	2	1
79.1909	307.517	1810.95	583.151	78.2761	222.567	2083.93	628.509	0.537643	Burn 24	24	2	1
79.5951	282.55	1710.37	529.504	78.8886	207.128	2140.59	611.369	0.520719	Burn 24	24	2	1
79.9941	321.567	2024.2	615.43	76.3627	238.165	2225.23	714.026	0.559884	Burn 24	24	2	1
79.0179	299.463	1821.88	578.465	77.7098	245.911	2136.38	671.434	0.559998	Burn 24	24	2	1
77.2658	308.678	1691.47	575.007	75.6831	239.221	2134.15	695.732	0.611892	Burn 24	24	2	1
77.137	326.303	2077.03	657.741	71.8403	274.015	2572.35	910.804	0.59099	Burn 24	24	2	1
66.6962	367.895	1981.71	792.332	67.6926	289.797	2433.96	962.841	0.536046	Burn 24	24	2	1
84.3744	374.527	1731.04	547.773	81.1172	271.111	1857.79	564.246	0.663014	Burn 24	24	2	1
78.6008	294.947	1760.93	566.293	77.4225	270.394	2240.69	704.288	0.493186	Burn 24	24	2	1
76.2199	384.469	2259.83	743.511	76.1054	546.342	2976.42	1108.5	0.630055	Burn 24	24	2	1
79.7152	338.378	2093.22	622.341	77.6252	349.561	2401.78	800.866	0.571604	Burn 24	24	2	1
79.7891	316.18	1773.41	565.455	79.276	249.113	2034.84	612.152	0.577126	Burn 24	24	2	1
80.5677	261.828	1610.63	498.08	83.2805	181.922	1774.47	437.935	0.43358	Burn 24	24	2	1
82.0288	312.495	1727.1	533.203	77.6673	239.208	1893.77	603.821	0.569494	Burn 24	24	2	1
79.537	305.826	1719.59	561.942	79.2828	218.307	1860.58	552.036	0.516545	Burn 24	24	2	1
81.159	273.851	1778.86	517.665	78.6402	198.29	1915.1	558.671	0.534753	Burn 24	24	2	1
78.3543	292.517	1693.02	560.062	78.841	193.407	1971.04	566.011	0.52889	Burn 24	24	2	1
81.3882	320.963	1614.4	521.897	81.1264	253.228	1768.64	534.124	0.590269	Burn 24	24	2	1
79.3799	313.441	1902.1	570.236	76.0581	237.801	2190.85	700.779	0.562535	Burn 24	24	2	1
81.0162	280.099	1570.97	496.705	82.1329	152.707	1657.9	422.998	0.466747	Burn 24	24	2	1
81.3107	323.812	1802.69	561.656	78.9058	243.481	2010.87	620.531	0.576769	Burn 24	24	2	1
75.283	294.311	1764.25	613.214	76.5292	206.607	2154.27	670.538	0.511489	Burn 24	24	2	1
80.4404	293.73	1827.53	562.317	77.354	235.455	2262.32	697.594	0.546359	Burn 24	24	2	1
78.9523	318.326	1912.44	595.588	75.4685	232.711	2298.81	739.762	0.591273	Burn 24	24	2	1
79.8234	300.792	1634.77	527.744	80.2157	194.75	1877.94	529.789	0.556152	Burn 24	24	2	1
80.463	342.805	1920.78	606.852	78.8998	253.2	2214.73	666.211	0.611834	Burn 24	24	2	1
80.8961	378.031	2108.27	649.237	78.1481	270.858	2142.41	677.927	0.633273	Burn 24	24	2	1
87.8626	373.051	1715.27	508.872	83.4844	276.342	1663.71	496.429	0.630343	Burn 24	24	2	1
86.1344	404.64	1857.13	556.243	82.2819	302.117	2142.41	620.443	0.678853	Burn 24	24	2	1
84.959	372.045	1706.15	527.715	84.9195	293.901	1896.91	528.409	0.618034	Burn 24	24	2	1
75.6994	308.588	2091.61	682.812	73.9026	386.878	2514.28	943.408	0.560576	Burn 24	24	2	1
79.6948	284.915	1772.57	557.796	76.2558	237.123	2093.12	686.673	0.510988	Burn 24	24	2	1
79.7584	347.713	2058.84	629.177	78.0206	300.721	2088.77	686.227	0.565391	Burn 24	24	2	1
77.0012	309.9	2244.13	699.526	74.8398	279.255	2283.92	783.293	0.53083	Burn 24	24	2	1
73.2158	346.716	1533.69	531.344	80.707	316	2065.18	608.476	0.635135	Burn 24	24	2	1
76.5419	320.322	1696.81	583.654	78.7679	226.705	2199.59	633.447	0.469128	Burn 24	24	2	1
87.0695	344.083	1793.41	514.949	83.1209	337.145	3188.14	814.375	0.616491	Burn 24	24	2	1
67.9846	421.334	2616.37	984.044	70.6324	585.472	3214.7	1344.81	0.585218	Burn 24	24	2	1
76.5332	298.177	1882.57	633.358	75.4362	244.687	2332.45	774.593	0.517818	Burn 24	24	2	1
75.2787	349.118	2058.28	711.916	73.7129	289.191	2469.54	858.087	0.611503	Burn 24	24	2	1
76.7986	322.554	1926.3	648.041	73.5562	241.602	2404.91	825.714	0.571687	Burn 24	24	2	1
81.2238	343.853	2050.62	633.992	75.9459	252.131	2070.05	701.243	0.61378	Burn 24	24	2	1
78.7415	319.925	1817.15	599.494	75.5715	239.608	2059.15	704.826	0.566429	Burn 24	24	2	1
73.9363	300.37	2017.86	690.094	69.7498	277.903	2766.62	997.605	0.596099	Burn 24	24	2	1
78.2178	309.988	1960.39	624.701	74.4416	219.655	2431.28	794.002	0.60762	Burn 24	24	2	1
79.3447	345.163	2192.01	642.229	73.6971	278.674	2672.08	908.163	0.670523	Burn 24	24	2	1
74.6479	357.777	2432.65	784.783	73.8939	440.869	2794.96	1038.98	0.595566	Burn 24	24	2	1
78.9149	337.21	1793.67	582.296	78.6999	280.707	2139.77	662.078	0.549148	Burn 24	24	2	1
82.4908	390.118	1915.16	594.133	80.9286	288.715	2178.2	633.779	0.659738	Burn 24	24	2	1
86.2965	358.139	1586.64	496.077	84.3312	289.733	2012.2	547.725	0.638643	Burn 24	24	2	1
75.231	443.897	2622.61	873.111	71.5212	310.528	2264.96	868.757	0.640636	Burn 24	24	2	1
74.8832	339.583	2341.73	767.608	71.8023	375.707	3054.61	1105.99	0.628615	Burn 24	24	2	1
82.8065	379.128	2067.47	601.189	79.6415	265.147	2084.58	626.286	0.64203	Burn 24	24	2	1
74.3045	329.109	1805	649.454	74.9321	266.995	2415.49	793.821	0.578659	Burn 24	24	2	1
81.9373	441.973	2612.45	779.779	74.1886	264.829	2165.43	748.342	0.653923	Burn 24	24	2	1
78.8091	286.309	1743.95	556.869	78.3491	253.373	2360.44	717.37	0.541279	Burn 24	24	2	1
77.2292	336.794	2040.48	666.962	74.7584	286.506	2516.21	834.254	0.603882	Burn 24	24	2	1
78.022	334.413	2122.42	683.924	75.0272	360.107	2604.75	936.377	0.588998	Burn 24	24	2	1
78.2473	338.397	2139.58	680.552	76.6424	284.641	2435.84	781.637	0.615935	Burn 24	24	2	1
74.1981	354.547	2251.57	773.274	69.8805	304.052	2836.19	1059.1	0.615451	Burn 24	24	2	1
70.0041	342.146	2551.25	903.007	65.0964	256.272	2816.92	1138.35	0.598441	Burn 24	24	2	1
77.3852	313.33	2029.07	641.888	70.809	239.195	2461.3	885.027	0.633553	Burn 24	24	2	1
63.8215	387.007	2619.55	1019.35	57.2226	237.361	2767.43	1309.11	0.57114	Burn 24	24	2	1
81.9368	389.902	2053.39	629.666	76.0526	271.667	2087.36	713.793	0.657746	Burn 24	24	2	1
76.4352	353.321	2243.06	745.04	71.9636	237.011	2356.72	855.052	0.59721	Burn 24	24	2	1
62.8146	354.336	2591.77	1050.1	54.7709	241.84	2895.16	1433.72	0.602486	Burn 24	24	2	1
85.7853	350.483	1689.13	503.888	81.4464	240.482	1726.48	515.956	0.631264	Burn 24	24	2	1
79.4049	306.481	1734.78	545.282	78.8289	219.858	1987.24	586.993	0.572203	Burn 24	24	2	1
76.3655	327.511	2152.79	688.024	73.8343	280.073	2476.15	840.631	0.574146	Burn 24	24	2	1
76.465	309.359	2016.99	659.64	74.2942	204.743	2126.05	704.879	0.543594	Burn 24	24	2	1
71.2609	405.836	2562.48	928.155	65.7084	263.296	2535.13	1041.05	0.575697	Burn 24	24	2	1
78.1715	410.817	2011.96	680.835	75.7633	319.716	2124.48	748.442	0.671354	Burn 24	24	3	1
81.1686	351.873	1893	586.877	80.0145	244.812	1967.44	581.562	0.62604	Burn 24	24	3	1
79.4609	406.703	2072.93	670.018	76.2233	286.155	2201.63	732.101	0.663357	Burn 24	24	3	1
82.3622	394.286	2082.87	619.043	79.6323	306.216	2147.87	667.703	0.671668	Burn 24	24	3	1
80.0647	368.867	1470.91	514.745	79.4777	266.865	1731.11	539.968	0.662373	Burn 24	24	3	1
71.8541	442.302	2176.57	821.713	73.2461	363.152	2522.54	917.623	0.659042	Burn 24	24	3	1
89.0266	392.159	1803.21	514.771	84.0923	292.451	1718.63	512.785	0.670326	Burn 24	24	3	1
87.4065	403.889	1783.55	541.008	82.2582	278.261	1619.87	506.349	0.666602	Burn 24	24	3	1
84.5819	409.766	1752.83	547.274	81.1186	283.985	1706.47	537.903	0.677252	Burn 24	24	3	1
84.5277	392.829	1969.26	599.836	79.3488	264.994	1969.52	619.665	0.659532	Burn 24	24	3	1
82.0724	336.644	1726.76	561.503	80.5433	235.112	1724.42	519.512	0.600003	Burn 24	24	3	1
80.0674	342.658	1941.84	621.241	77.5575	216.849	2062.71	643.419	0.608997	Burn 24	24	3	1
78.1402	359.003	1636.47	592.919	79.1674	219.156	1737.03	534.766	0.601324	Burn 24	24	3	1
84.3554	356.112	1695.18	515.622	82.718	251.626	1624.92	483.384	0.61	Burn 24	24	3	1
77.145	347.876	1657.7	605.852	76.2068	184.627	1517.8	500.275	0.543636	Burn 24	24	3	1
80.3514	387.782	2003.03	645.418	76.6749	314.597	2319.04	784.938	0.67314	Burn 24	24	3	1
86.466	418.046	1727.99	565.177	79.8418	283.252	2006.45	627.956	0.683133	Burn 24	24	3	1
87.3242	419.751	1921.97	575.46	80.988	279.773	1978.43	602.134	0.685024	Burn 24	24	3	1
69.3944	427.171	2066.31	845.384	73.3265	257.172	2216.38	753.622	0.597418	Burn 24	24	3	1
78.2576	326.875	1534.18	549.121	80.4332	210.328	1770.25	512.495	0.587297	Burn 24	24	3	1
80.6981	377.493	1771.23	575.964	79.8664	274.631	2006.15	619.249	0.655958	Burn 24	24	3	1
80.9088	348.804	1676.86	576.399	79.8092	237.087	2073.41	606.034	0.613331	Burn 24	24	3	1
83.0459	413.539	2573.59	710.428	78.9715	279.145	2583.26	767.489	0.71189	Burn 24	24	3	1
79.9961	398.63	2171.74	703.479	74.9819	294.799	2457.82	829.913	0.693812	Burn 24	24	3	1
85.0509	354.984	1877.73	547.903	80.5685	255.336	1886.02	571.579	0.650829	Burn 24	24	3	1
79.8246	320.547	1644.74	556.08	80.8946	216.695	1782.42	513.617	0.577633	Burn 24	24	3	1
82.1643	365.191	1614.39	527.148	81.3853	249.21	1753.02	521.03	0.622116	Burn 24	24	3	1
77.0515	324.242	1789.98	625.846	77.6286	201.413	1942.51	588.494	0.565216	Burn 24	24	3	1
82.0786	357.532	1766.78	580.674	80.3556	249.313	1892.39	576.27	0.610193	Burn 24	24	3	1
83.2351	382.985	1949.14	613.685	78.2241	238.541	1965.51	620.585	0.651772	Burn 24	24	3	1
82.981	398.758	1640.54	549.708	81.5385	269.013	1679.57	524.258	0.650041	Burn 24	24	3	1
82.373	349.966	1837.65	580.691	81.0028	237.508	2056.89	581.809	0.619538	Burn 24	24	3	1
82.9429	382.133	1596.24	550.455	81.428	264.636	1846.56	556.366	0.642377	Burn 24	24	3	1
84.7987	436.132	1527.05	542.342	81.8537	279.291	1805.59	548.184	0.6922	Burn 24	24	3	1
81.3961	338.246	1732.64	535.28	79.8258	242.798	1757.11	544.81	0.620014	Burn 24	24	3	1
78.8949	382.78	1959.13	653.622	76.6397	231.621	2252.31	700.609	0.627158	Burn 24	24	3	1
71.469	393.237	1813.87	754.72	80.2357	210.639	1649.28	493.086	0.541754	Burn 24	24	3	1
81.2268	355.177	1775.42	547.796	78.7882	262.833	2052.42	636.886	0.652446	Burn 24	24	3	1
79.1446	328.387	1627.34	559.861	80.9229	227.799	1840.6	532.24	0.593143	Burn 24	24	3	1
80.9199	387.304	2282.02	687.433	73.9102	255.593	2172.19	750.396	0.66399	Burn 24	24	3	1
82.5126	407.037	2319.29	673.213	77.2288	273.672	2507.65	770.174	0.697616	Burn 24	24	3	1
84.494	385.72	1863.99	559.761	81.413	271.838	1804.53	547.38	0.623578	Burn 24	24	3	1
79.3894	359.197	1858.08	612.482	78.4656	275.157	2071.19	652.46	0.611328	Burn 24	24	3	1
79.4916	404.832	1925.98	647.851	75.06	302.706	2185.12	764.383	0.677868	Burn 24	24	3	1
83.2202	329.973	1673.65	520.603	79.8455	265.206	1805.41	573.324	0.628356	Burn 24	24	3	1
81.3598	410.202	1948.89	645.505	78.2182	302.588	2118.1	695.247	0.669653	Burn 24	24	3	1
79.396	365.694	2143.83	702.328	72.8417	243.434	2200.78	777.255	0.631261	Burn 24	24	3	1
76.0497	375.057	1866.72	693.813	78.4745	235.763	1986.83	614.141	0.592828	Burn 24	24	3	1
76.9209	425.893	2242.04	754.533	71.1914	291.479	2210.91	839.604	0.662962	Burn 24	24	3	1
75.6014	441.661	2466.94	854.369	72.451	315.393	2573.63	925.76	0.664389	Burn 24	24	3	1
74.4927	377.393	2246.19	799.349	68.6607	317.13	2664.3	1035.15	0.647738	Burn 24	24	3	1
76.0586	322.567	1670.15	608.735	79.6166	190.686	1688.46	493.245	0.507707	Burn 24	24	3	1
78.2808	372.069	1683.36	596.001	76.9725	246.183	1735.46	582.695	0.618023	Burn 24	24	3	1
80.2737	311.303	1594.12	522.939	80.7626	199.111	1703.85	481.895	0.548075	Burn 24	24	3	1
84.2963	334.818	1664.24	515.419	82.9108	252.302	1649.95	483.236	0.593409	Burn 24	24	3	1
79.9649	329.927	1798.97	597.355	81.0257	192.97	1631.8	461.614	0.540575	Burn 24	24	3	1
82.3924	296.164	1574.1	489.475	82.1387	176.068	1507.43	412.275	0.534939	Burn 24	24	3	1
80.5804	293.779	1591.8	523.417	80.3809	191.367	1518.26	449.301	0.51308	Burn 24	24	3	1
74.9644	404.675	2108	777.544	74.73	308.325	2300.72	802.336	0.662003	Burn 24	24	3	1
78.2714	390.437	2090.57	695.083	74.6786	314.879	2377.75	831.738	0.640654	Burn 24	24	3	1
73.5756	371.935	1713.58	685.482	80.4536	205.246	1496.65	449.771	0.458058	Burn 24	24	3	1
69.6231	468.033	2420.18	962.052	74.4489	332.698	2695.86	923.152	0.639856	Burn 24	24	3	1
79.3816	335.478	1869.26	569.469	74.1496	263.808	1913.55	677.507	0.620977	Burn 24	24	3	1
86.429	386.008	1811.76	548.492	80.5818	255.782	1812.77	561.025	0.656936	Burn 24	24	3	1
48.1249	1275.35	1950.57	1551.76	76.353	758.798	2572.71	1179.71	0.298844	Burn 24	24	3	1
84.499	370.048	1453.48	505.686	80.911	241.542	1541.46	479.509	0.668049	Burn 24	24	3	1
80.9561	369.829	2344.36	715.983	75.9183	292.317	2083.1	716.771	0.665425	Burn 24	24	3	1
73.9473	409.202	2358.79	828.145	71.753	312.519	2371.51	883.493	0.65889	Burn 24	24	3	1
69.7956	412.998	2736.88	939.494	71.0179	434.976	3659.83	1270.4	0.665402	Burn 24	24	3	1
86.9646	359.992	1711.81	492.419	82.7576	264.871	1660.36	499.411	0.647388	Burn 24	24	3	1
83.4323	373.214	1828.74	587.261	81.0337	227.506	1645.79	492.553	0.605918	Burn 24	24	3	1
83.2878	382.837	1879.64	574.392	79.7066	260.542	1860.98	587.506	0.654336	Burn 24	24	3	1
81.8239	379.904	2114.84	648.02	77.5548	253.46	2163.93	686.511	0.668857	Burn 24	24	3	1
82.2507	376.896	1870.25	596.245	80.435	245.029	1971.02	580.781	0.646423	Burn 24	24	3	1
91.4797	420.089	1886.07	523.167	84.5831	288.223	1733.13	504.309	0.69637	Burn 24	24	3	1
86.671	408.226	1518.31	506.842	82.9393	280.582	1519.29	481.598	0.683109	Burn 24	24	3	1
80.4534	368.745	1928.48	631.901	75.2625	254.402	2049.28	696.291	0.65997	Burn 24	24	3	1
78.6814	458.211	2333.47	753.26	73.1675	308.215	2127.39	787.68	0.68829	Burn 24	24	3	1
80.4978	436.017	2140.16	672.946	78.9326	278.122	2065.23	645.671	0.670366	Burn 24	24	3	1
77.491	390.765	1870.42	650.894	76.3659	267.163	1991.33	665.284	0.619849	Burn 24	24	3	1
74.4054	403.804	5741.15	1393.02	65.7566	358.692	2924.57	1224.83	0.737122	Burn 24	24	3	1
84.0273	388.142	1755.89	557.574	81.0537	291.821	1827.15	574.892	0.653775	Burn 24	24	3	1
83.3852	304.236	1645.75	492.973	82.0501	224.426	1676.8	475.278	0.574393	Burn 24	24	3	1
42.3687	860.525	1996.13	1479.33	73.3893	356.697	2035.87	791.986	0.371253	Burn 24	24	3	1
84.8017	375.97	2144.78	587.303	78.8904	281.223	2224.04	688.003	0.666676	Burn 24	24	3	1
87.2752	405.174	1818.84	511.244	82.7486	257.822	1638.7	491.186	0.689845	Burn 24	24	3	1
83.0241	410.65	2092.06	638.629	76.4128	278.249	2063.62	692.916	0.681746	Burn 24	24	3	1
84.3923	411.249	1633.41	551.634	80.2855	283.562	1524.84	521.511	0.689297	Burn 24	24	3	1
78.6576	362.136	2019.11	658.347	75.7274	295.137	2228.38	757.35	0.663361	Burn 24	24	3	1
43.971	698.592	1970.5	1371	74.2966	236.942	1913.01	663.866	0.389172	Burn 24	24	3	1
85.2212	391.953	1926.22	598.31	79.96	274.683	1775.91	572.105	0.685575	Burn 24	24	3	1
80.5008	390.068	2192.1	695.719	76.5015	273.437	2256.6	737.544	0.658994	Burn 24	24	3	1
80.1223	344.879	1859.57	608.873	78.3565	275.165	2062.93	653.96	0.642055	Burn 24	24	3	1
79.7221	397.144	1870.97	665.926	78.1076	274.085	1888.16	623.831	0.622728	Burn 24	24	3	1
77.2378	484.021	1981.76	749.135	70.3272	284.636	2367.57	885.073	0.724311	Burn 24	24	3	1
75.7443	442.017	1976.44	744.633	70.2998	271.478	2029.81	788.585	0.689686	Burn 24	24	3	1
74.3531	335.362	1699.2	635.772	77.7303	205.375	1695.72	533.851	0.57127	Burn 24	24	3	1
87.8739	265.517	1438.43	387.819	78.1991	161.317	1608.82	475.124	0.662426	Burn 24	24	3	1
87.8876	174.698	1190.22	279.352	75.7819	84.8011	1951.21	539.364	0.702877	Burn 24	24	3	1
75.9571	354.478	2421.08	709.618	69.2689	451.52	2993.85	1203.49	0.686517	Burn 24	24	3	1
48.2197	1108.86	1994.4	1443.93	72.6444	487.484	2366.58	988.602	0.417971	Burn 24	24	3	1
83.7909	404.843	1942.68	585.612	70.4035	260.9	2607.7	953.279	0.75951	Burn 24	24	3	1
81.1835	278.608	1935.56	561.167	65.279	195.318	2427.37	973.292	0.724564	Burn 24	24	3	1
78.2762	402.587	2224.79	705.828	73.789	291.377	2340.88	822.547	0.695791	Burn 24	24	3	1
87.7342	218.466	1810.72	418.338	72.6129	295.783	2354.28	851.06	0.676318	Burn 24	24	3	1
79.3441	421.927	2013.66	674.576	75.4125	288.432	2190.32	761.886	0.700052	Burn 24	24	3	1
73.005	451.87	2163.34	786.387	72.3208	288.902	2613.8	919.732	0.612273	Burn 24	24	4	1
79.1833	363.95	2007.13	629.639	74.6511	265.229	2194.31	745.133	0.633582	Burn 24	24	4	1
83.5299	346.626	1820.25	539.132	79.9373	254.77	1810.5	560.85	0.623823	Burn 24	24	4	1
80.4183	319.013	1836.8	576.913	77.9322	231.552	1951.8	606.767	0.546388	Burn 24	24	4	1
81.1954	348.027	2022.84	611.753	76.8851	283.609	2059.02	684.797	0.597613	Burn 24	24	4	1
82.698	302.202	1844.54	527.698	76.7043	230.512	1872.23	613.775	0.579998	Burn 24	24	4	1
74.2001	315.338	1954.71	688.94	72.4883	255.741	2306.39	807.628	0.579241	Burn 24	24	4	1
80.1649	318.576	1940.32	590.444	76.3603	247.656	2105.72	679.711	0.577043	Burn 24	24	4	1
80.4794	306.883	1810.64	556.801	78.4284	260.36	2012.11	634.844	0.53036	Burn 24	24	4	1
80.2886	384.034	2381.22	694.264	75.6115	276.009	2061.58	703.971	0.592227	Burn 24	24	4	1
77.02	358.816	2250.43	708.744	75.393	293.886	2429.27	807.649	0.597497	Burn 24	24	4	1
81.4823	399.515	2067.81	654.871	78.1177	284.661	1986.85	652.813	0.642708	Burn 24	24	4	1
79.3008	355.022	1953.54	628.385	77.8564	263.35	2139.71	676.868	0.56916	Burn 24	24	4	1
80.096	332.184	1935.41	602.454	78.674	270.936	2221.05	679.097	0.5817	Burn 24	24	4	1
76.4467	406.002	2166.63	720.216	73.9792	296.142	2389	835.07	0.626045	Burn 24	24	4	1
81.7885	371.23	2201.55	648.688	79.9222	273.369	2254.92	659.123	0.600077	Burn 24	24	4	1
77.0688	324.066	2103.51	672.076	72.3671	316.246	2508.92	909.622	0.625478	Burn 24	24	4	1
80.4726	363.531	2128.96	651.216	76.9441	304.882	2274.8	745.727	0.637719	Burn 24	24	4	1
76.3257	387.605	2307.89	774.314	73.7424	272.015	2345.39	808.064	0.640818	Burn 24	24	4	1
80.7844	347.419	1962.05	595.976	77.1452	277.33	2161.97	699.232	0.622607	Burn 24	24	4	1
82.8716	374.8	2324.28	652.758	77.9325	281.014	2266.4	710.194	0.635998	Burn 24	24	4	1
78.1998	307.908	1666.92	563.74	77.3852	215.698	1925.6	596.399	0.568572	Burn 24	24	4	1
77.8875	350.035	1985.4	649.797	76.204	270.485	2230.67	724.124	0.536987	Burn 24	24	4	1
79.3456	351.978	1815.09	593.768	77.6623	245.519	1861.59	600.096	0.542393	Burn 24	24	4	1
75.862	330.848	2262.84	736.993	73.1883	300.353	2378.94	852.962	0.536915	Burn 24	24	4	1
83.4873	358.651	2120.35	611.5	81.0558	270.947	2037.43	593.524	0.578861	Burn 24	24	4	1
74.243	303.342	1607.73	587.458	76.4125	235.942	2181.09	690.228	0.515979	Burn 24	24	4	1
76.0688	319.894	1872.83	646.2	77.3158	259.724	2130.5	675.662	0.566658	Burn 24	24	4	1
80.9804	278.204	1723.61	515.514	78.0735	211.351	1917.65	578.172	0.519133	Burn 24	24	4	1
79.4666	317.78	2141.06	641.415	74.5766	292.205	2183.09	763.587	0.543267	Burn 24	24	4	1
78.4465	275.909	1710.68	532.855	75.9682	218.08	2196.36	691.786	0.492712	Burn 24	24	4	1
81.8287	337.796	1945.04	578.71	78.5828	259.411	1915.92	605.883	0.553789	Burn 24	24	4	1
77.2317	336.641	2005.95	659.348	75.5538	266.857	2052.11	696.538	0.558355	Burn 24	24	4	1
82.2212	301.206	1587.36	499.67	82.4391	207.594	1636.79	457.113	0.504766	Burn 24	24	4	1
81.9944	335.529	1903.7	578.314	79.4075	234.832	1816.34	560.335	0.54961	Burn 24	24	4	1
82.4661	329.178	1917.87	569.128	79.2078	240.55	2028.19	611.055	0.555077	Burn 24	24	4	1
82.0672	325.101	1953	577.937	78.1585	256.038	1861.59	609.702	0.563945	Burn 24	24	4	1
82.6844	340.573	1800.96	547.735	77.8175	237.696	1984.4	621.473	0.529708	Burn 24	24	4	1
80.0704	414.052	2109.05	693.747	78.5671	276.782	1930.55	632.037	0.633726	Burn 24	24	4	1
77.0813	369.424	2223.32	719.427	73.6606	289.732	2438.71	847.546	0.583026	Burn 24	24	4	1
82.5595	369.795	1990.45	605.445	80.8636	288.35	2051.83	618.267	0.629252	Burn 24	24	4	1
78.2673	337.431	1875.25	627.773	79.0988	261.235	2007.36	622.053	0.552951	Burn 24	24	4	1
83.7324	382	2010.69	571.245	79.722	245.828	1676.62	529.583	0.580628	Burn 24	24	4	1
80.0079	327.998	1965.91	605.51	77.8457	278.383	2139.81	687.928	0.588981	Burn 24	24	4	1
81.2242	377.823	1982.79	629.393	78.2183	291.742	2019.5	668.346	0.616981	Burn 24	24	4	1
79.1283	301.341	1457.78	511.024	80.0208	186.53	1718.26	488.413	0.560895	Burn 24	24	4	1
83.0531	252.385	1681.79	468.203	80.0375	137.156	1826.22	481.501	0.509356	Burn 24	24	4	1
73.6721	350.231	2458.22	832.865	70.5265	377.382	2697.94	1041.07	0.59434	Burn 24	24	4	1
76.2115	318.256	2054.67	692.321	76.832	228.535	2396.21	721.137	0.562313	Burn 24	24	4	1
79.3122	378.484	1966.49	659.24	77.2474	375.048	2612.93	868.508	0.614443	Burn 24	24	4	1
78.2961	312.822	1672.09	555.201	77.9667	217.995	1887.38	591.788	0.586306	Burn 24	24	4	1
81.0894	332.866	1591.19	539.947	82.1677	244.859	1829.62	521.548	0.546107	Burn 24	24	4	1
75.4077	387.602	2751.31	883.347	73.1546	299.591	2434.78	862.695	0.598522	Burn 24	24	4	1
74.8371	358.957	2113.97	719.158	74.2502	362.226	2320.75	855.377	0.574576	Burn 24	24	4	1
81.0849	352.898	2004.91	632.077	78.8194	245.999	1926.7	601.754	0.585875	Burn 24	24	4	1
83.6994	272.596	1562.26	466.901	82.9728	195.443	1641.49	441.351	0.492708	Burn 24	24	4	1
79.1699	329.379	1846.78	603.133	77.7643	221.087	2003.19	629.503	0.524794	Burn 24	24	4	1
81.6049	335.903	1832.03	567.535	79.1042	238.715	1810.73	571.946	0.574046	Burn 24	24	4	1
74.5229	303.482	2068.06	685.16	67.9037	295.572	2692.26	1053.69	0.558082	Burn 24	24	4	1
80.542	340.611	1846.59	591.005	79.1233	246.766	1988.48	611.577	0.588876	Burn 24	24	4	1
75.2191	268.021	1799.84	607.556	70.6031	141.389	2430.79	809.612	0.580908	Burn 24	24	4	1
81.71	330.01	1761.25	556.159	79.5821	243.732	1911.66	584.032	0.568282	Burn 24	24	4	1
80.3115	315.084	1865.97	572.271	75.6023	237.264	2304.18	741.157	0.595448	Burn 24	24	4	1
80.0471	282.081	2110.43	613.384	75.8723	219.304	2394.31	740.895	0.574176	Burn 24	24	4	1
80.2205	372.578	2167.38	674.766	75.0687	267.541	2343.7	784.448	0.653926	Burn 24	24	4	1
76.8894	322.439	2101.1	682.211	74.9422	257.287	2434.25	798.616	0.627906	Burn 24	24	4	1
80.0404	346.732	1891.49	602.965	78.5244	247.493	2092.69	637.604	0.612821	Burn 24	24	4	1
79.2255	417.022	2862.75	846.537	73.7121	282.41	2415.2	843.19	0.649277	Burn 24	24	4	1
87.2117	402.929	1958.64	567.446	81.3417	286.572	2190.64	635.352	0.690092	Burn 24	24	4	1
80.0245	377.174	1965.61	620.527	78.0104	265.133	2281.16	720.569	0.660242	Burn 24	24	4	1
80.2039	360.497	1960.05	601.886	78.6273	260.891	2138.19	664.888	0.634371	Burn 24	24	4	1
78.654	341.412	2002.1	644.911	76.6964	238.705	2166.71	686.278	0.586909	Burn 24	24	4	1
76.4558	335.864	2097.97	680.023	72.6959	223.931	2441.98	826.061	0.621225	Burn 24	24	4	1
78.7909	393.416	2516.89	754.038	73.9579	288.733	2675.53	907.45	0.693422	Burn 24	24	4	1
81.0774	325.136	1689.25	543.379	79.26	233.884	1996.35	593.749	0.610808	Burn 24	24	4	1
83.3359	331.089	1753.02	521.328	81.2893	251.721	1962.21	566.901	0.611147	Burn 24	24	4	1
85.2741	397.12	1695.07	551.939	79.6398	246.352	1663.34	532.594	0.639346	Burn 24	24	4	1
79.7463	324.652	1825.49	570.765	77.0242	235.154	2254.83	695.604	0.636657	Burn 24	24	4	1
80.2874	366.708	1916.35	614.567	77.8167	251.932	2131.68	667.566	0.6568	Burn 24	24	4	1
87.3284	409.32	1823.22	537.442	82.5202	269.83	1740.11	520.944	0.685886	Burn 24	24	4	1
80.4847	410.789	1931.1	618.506	77.9301	288.438	2229.56	711.309	0.69952	Burn 24	24	4	1
86.5417	399.541	1906.25	530.034	82.2466	290.088	2000.76	590.191	0.691751	Burn 24	24	4	1
80.0183	340.462	2081.72	628.535	75.7813	240.336	2365.34	762.366	0.638325	Burn 24	24	4	1
81.6785	365.587	1921.56	592.949	79.6175	256.354	2229.48	655.872	0.646008	Burn 24	24	4	1
80.0781	346.529	1957	599.267	77.4868	260.227	2211.38	693.758	0.649505	Burn 24	24	4	1
78.2434	394.119	2297.93	735.614	77.0103	443.265	2991.47	1023.03	0.653532	Burn 24	24	4	1
73.5775	387.166	2324.82	785.333	73.4431	609.203	3607.11	1385.37	0.680117	Burn 24	24	4	1
82.9187	350.953	1817.05	557.37	78.6468	251.826	1845.52	587.829	0.633836	Burn 24	24	4	1
79.6984	310.957	1712.32	545.057	78.6583	218.67	1991.53	592.972	0.570904	Burn 24	24	4	1
78.8005	339.116	1917.78	628.427	78.599	212.198	1924.23	572.675	0.596386	Burn 24	24	4	1
76.1434	360.01	2282.12	769.697	71.2353	277.035	2548.06	927.669	0.603076	Burn 24	24	4	1
63.9072	391.996	2224.75	964.013	64.1055	349.556	2728.29	1188.22	0.662241	Burn 24	24	4	1
76.7411	331.307	1867.19	653.656	80.0159	201.089	1781.21	517.12	0.511921	Burn 24	24	4	1
77.569	347.399	2110.87	680.803	74.6099	288.392	2631.4	869.586	0.640894	Burn 24	24	4	1
73.515	400.899	1947.92	738.288	71.0839	293.35	2755.81	981.793	0.648824	Burn 24	24	4	1
74.5853	424.271	2700.05	905.438	65.9256	332.092	3292.1	1311.11	0.689347	Burn 24	24	4	1
76.9744	312.574	1723.42	596.455	78.8803	212.132	1977.81	582.464	0.55154	Burn 24	24	4	1
82.2826	330.369	1677.09	536.419	80.3019	232.797	1734.9	526.329	0.594461	Burn 24	24	4	1
78.4326	401.09	2314	762.168	73.501	292.86	2237.99	793.632	0.70382	Burn 24	24	4	1
77.6633	389.984	2081.15	677.296	70.1266	308.894	2370.64	915.429	0.70601	Burn 24	24	4	1
79.858	325.071	1783.88	571.7	77.7022	224.184	2139.82	659.058	0.603179	Burn 24	24	4	1
79.8607	383.287	2431.36	732.566	73.4714	294.143	2427.85	845.695	0.688895	Burn 24	24	4	1
81.6324	319.419	1806.92	550.971	78.1552	233.33	2144.44	656.094	0.613798	Burn 24	24	4	1
81.605	391.378	2162.1	633.242	72.1373	271.223	2149.85	788.841	0.696094	Burn 24	24	4	1
77.4158	376.3	2333.1	753.183	74.3967	330.182	2466.48	869.843	0.642275	Burn 24	24	4	1
81.3632	354.942	1884.41	584.086	78.7064	228.23	1847.84	564.746	0.571222	Burn 24	24	4	1
72.7167	315.415	1735.77	668.063	78.8094	205.768	1705.43	504.506	0.421362	Burn 24	24	4	1
82.2142	314.117	1618.19	524.033	81.5081	252.499	1624.04	497.629	0.545563	Burn 24	24	4	1
79.5499	387.838	2267.94	724.294	75.4295	262.51	2265.82	753.829	0.674227	Burn 24	24	4	1
79.1249	391.944	2075.09	662.708	75.3081	305.874	2126.19	745.202	0.671971	Burn 24	24	4	1
80.317	368.007	1932.34	623.214	78.491	247.415	2277.56	677.68	0.633209	Burn 24	24	4	1
82.9489	372.38	1857.69	582.771	82.2947	286.561	2025.43	588.046	0.626337	Burn 24	24	4	1
84.6706	381.6	1546.18	521.793	80.0715	264.856	1493.58	494.528	0.622085	Burn 24	24	4	1
79.7781	295.472	1741.78	550.617	79.7614	214.2	2031.44	569.983	0.5149	Burn 24	24	4	1
82.4325	332.172	1751.3	548.665	80.5263	230.223	1639.34	497.116	0.561426	Burn 24	24	4	1
84.9709	392.15	1850.45	574.558	79.9114	248.537	1582.13	502.366	0.589009	Burn 24	24	4	1
81.1332	396.886	2214.07	660.798	80.099	286.478	2370.48	688.286	0.584988	Burn 24	24	4	1
83.0526	370.866	1767.81	536.88	82.0693	262.006	1619.36	499.573	0.589197	Burn 24	24	4	1
82.7819	340.836	1875.34	553.288	81.1858	239.42	1772.4	517.36	0.567426	Burn 24	24	4	1
85.8846	363.252	1622.59	509.073	81.7335	241.769	1462.32	456.355	0.610502	Burn 24	24	4	1
84.6594	321.488	1771.59	501.173	76.3613	249.401	2088.51	677.905	0.62265	Burn 24	24	4	1
89.38	287.878	1739.01	417	78.6182	263.057	1838.13	591.068	0.631269	Burn 24	24	4	1
84.7818	386.359	1969.09	559.55	79.8387	256.572	1744.04	552.479	0.634272	Burn 24	24	4	1
83.0763	423.265	2105.89	654.261	78.5574	289.809	2070.63	669.465	0.671266	Burn 24	24	4	1
79.4761	381.53	2299.76	724.385	76.0532	294.346	2201.23	744.656	0.648088	Burn 24	24	4	1
76.0363	272.149	1544.74	533.991	79.0543	148.848	1863.65	508.425	0.557827	Burn 24	24	4	1
80.9106	363.058	1906.84	599.65	78.4571	229.308	1995.23	605.636	0.600054	Burn 24	24	4	1
81.1015	358.081	2107.78	629.486	78.1721	270.493	2248.26	697.589	0.620856	Burn 24	24	4	1
90.5651	175.399	1320.73	273.817	67.5303	146.894	2083.96	788.649	0.641553	Burn 24	24	4	1
81.6763	290.788	1689.43	511.647	77.9241	281.931	2057.46	671.192	0.664734	Burn 24	24	1	2	185
69.0938	472.204	933.856	541.816	81.6676	270.107	1616.47	504.043	0.707199	Burn 24	24	1	2
76.3259	583.024	2165	853.737	73.0115	279.303	2210.26	797.473	0.693447	Burn 24	24	1	2
79.9027	208.529	1448.2	426.266	78.0932	207.262	2093.83	625.874	0.626815	Burn 24	24	1	2
79.2966	313.445	1699.19	545.603	76.355	284.271	2501.44	797.728	0.694376	Burn 24	24	1	2
80.8313	607.683	745.447	377.077	83.143	722.341	5175.56	1473.02	0.746373	Burn 24	24	1	2
70.1537	133.339	3223.42	1033.71	65.5157	155.012	2531.37	974.482	0.656357	Burn 24	24	1	2
74.308	344.638	2343.83	764.441	71.0096	347.645	2660.6	997.363	0.673731	Burn 24	24	1	2
80.0264	311.956	1644.31	541.93	77.7929	295.247	2108.99	704.958	0.689159	Burn 24	24	1	2
79.9964	336.513	2031.8	611.388	76.0366	306.742	2377.26	791.576	0.690583	Burn 24	24	1	2
84.6068	130.725	1316.59	304.043	75.3872	249.928	2076.77	702.272	0.61621	Burn 24	24	1	2
84.3433	405.776	1405.96	515.228	80.5858	257.375	1607.16	511.407	0.684247	Burn 24	24	1	2
74.9524	469.378	2030.96	777.041	71.513	328.796	2392.16	906.202	0.694713	Burn 24	24	1	2
77.6604	421.996	2030.79	734.274	75.1878	288.412	2288.09	779.972	0.679438	Burn 24	24	1	2
53.2225	544.138	1925.73	1103.01	76.4509	126.772	1729.52	506.095	0.537391	Burn 24	24	1	2
82.7204	261.763	1326.63	414.297	80.9481	273.302	1799.64	556.779	0.652703	Burn 24	24	1	2
79.6655	342.544	1888.14	592.378	75.9195	331.551	2497.79	835.848	0.693288	Burn 24	24	1	2
82.2992	287.458	1398.73	429.52	82.0935	305.542	1957.64	589.157	0.673719	Burn 24	24	1	2
84.4539	191.164	1997.07	449.228	71.1099	590.128	3443.2	1355.65	0.6638	Burn 24	24	2	2
85.0201	124.105	1173.95	268.938	74.5347	346.298	2293.28	840.483	0.678727	Burn 24	24	2	2
83.6722	80.0051	832.433	191.682	79.0093	318.703	1924.14	652.977	0.706981	Burn 24	24	2	2
83.1531	111.46	974.324	246.303	77.2832	318.747	2110.02	724.155	0.703663	Burn 24	24	2	2
84.0678	148.254	1032.14	264.776	83.6999	338.945	2199.62	629.609	0.702688	Burn 24	24	2	2
86.7739	114.282	1167.93	240.025	81.2121	323.759	2400.24	627.967	0.621581	Burn 24	24	2	2
83.7472	158.528	1112.07	276.859	84.1755	342.436	1955.04	587.572	0.694577	Burn 24	24	2	2
84.3185	108.551	976.304	232.544	79.1372	330.162	2258.55	718.637	0.697968	Burn 24	24	2	2
81.337	303.473	1633.53	500.24	80.939	540.302	2703.26	914.209	0.607427	Burn 24	24	2	2
84.0749	345.945	1508.68	504.707	83.444	844.843	2957.85	1190.84	0.60266	Burn 24	24	2	2
84.6138	376.784	1781.87	544.531	79.9852	314.789	2116.46	661.389	0.698324	Burn 24	24	2	2
69.4098	430.44	2066.77	833.235	57.1699	337.599	2354	1186.82	0.734599	Burn 24	24	2	2
79.4145	339.392	1992.53	644.836	73.2968	325.537	2393.78	871.091	0.711076	Burn 24	24	2	2
83.7353	304.388	1643.23	481.979	80.3343	313.171	2845.29	675.383	0.606865	Burn 24	24	2	2
77.5372	436.497	1805.57	641.494	78.3381	429.529	2545.55	853.553	0.670751	Burn 24	24	2	2
75.5017	416.755	2218.19	760.844	75.9209	685.849	3244.11	1288.57	0.612187	Burn 24	24	2	2
71.9131	454.367	3075.3	1015.58	67.4445	842.999	4784.21	1963.82	0.652171	Burn 24	24	2	2
79.546	351.244	1569.68	544.395	79.3712	376.985	2249.77	732.472	0.642871	Burn 24	24	2	2
78.4554	371.812	1580.47	548.354	79.0086	280.879	2152.5	658.587	0.580389	Burn 24	24	2	2
77.0822	525.145	2507.71	796.615	79.1173	345.247	2384.28	750.891	0.68627	Burn 24	24	2	2
76.7709	456.932	1798.99	673.323	78.7867	324.238	2328.39	749.135	0.682841	Burn 24	24	2	2
77.0418	472.489	2450.49	802.568	73.5815	367.816	2678.42	946.248	0.640376	Burn 24	24	2	2
77.0738	464.951	1684.83	639.474	79.1567	324.536	2061.96	667.218	0.662206	Burn 24	24	2	2
74.1178	437.559	1884.19	767.11	76.5218	282.56	2104.61	703.645	0.593039	Burn 24	24	2	2
74.7282	395.376	2012.38	757.724	79.6365	236.673	1823.08	559.467	0.590035	Burn 24	24	2	2
81.3851	318.062	1780.58	544.747	80.7028	233.558	1797.3	535.331	0.524038	Burn 24	24	2	2
80.0691	388.727	2206.96	702.274	75.6072	330.458	2310.06	815.785	0.635969	Burn 24	24	2	2
73.9277	407.812	1939.31	782.898	71.342	226.587	1588.95	615.876	0.542417	Burn 24	24	2	2
88.5168	390.527	1586.12	497.551	83.6732	301.094	1727.43	525.715	0.656932	Burn 24	24	2	2
79.5112	382.978	2230.98	685.632	75.8122	317.856	2344.16	794.644	0.602323	Burn 24	24	2	2
82.6047	264.447	1602.24	449.859	79.6535	367.944	2500.58	784.279	0.664186	Burn 24	24	2	2
81.1941	303.111	1753.34	533.737	78.3729	401.301	2650.53	873.628	0.676722	Burn 24	24	2	2
82.1457	271.061	1611.47	470.059	77.8544	329.929	2339.61	765.142	0.663556	Burn 24	24	2	2
83.723	284.408	1574.97	453.131	79.5221	358.502	2200.05	736.965	0.677918	Burn 24	24	2	2
80.9512	283.69	1620.19	493.462	78.7952	359.844	2252.13	752.52	0.657625	Burn 24	24	2	2
81.9356	159.177	1235.12	321.983	79.4613	312.308	2157.19	688.61	0.672276	Burn 24	24	2	2
85.6815	77.7057	1019.08	209.381	74.1219	264.276	2175.16	758.293	0.60676	Burn 24	24	2	2
89.6203	48.9542	868.818	133.349	79.5716	176.868	1799.39	512.431	0.590074	Burn 24	24	2	2
86.1029	68.6897	920.723	180.725	79.2476	228.082	1999.19	596.479	0.6021	Burn 24	24	2	2
78.314	541.12	1948.55	746.983	77.6341	616.516	2908.69	1116.88	0.683812	Burn 24	24	2	2
81.8702	452.497	1976.29	650.614	80.3251	461.986	2212.05	792.305	0.516419	Burn 24	24	2	2
79.2175	359.971	1890.47	588.065	74.6321	335.927	2286.87	815.997	0.716202	Burn 24	24	2	2
83.2091	291.828	1393.82	435.127	83.5251	314.322	1922.39	557.653	0.660802	Burn 24	24	2	2
68.0031	258.412	1689.59	693.593	80.1162	191.319	1576.31	467.63	0.53909	Burn 24	24	2	2
79.5361	345.996	1725.14	589.172	79.5502	294.878	1912.53	619.769	0.639464	Burn 24	24	2	2
83.6346	341.56	1810.76	523.462	77.5789	342.116	2189.49	745.744	0.693916	Burn 24	24	2	2
82.6299	275.932	1701.64	504.329	79.3048	313.526	2214.63	693.902	0.613216	Burn 24	24	2	2
79.1323	333.801	2310.12	621.967	76.849	631.642	3305.87	1247.57	0.646763	Burn 24	24	2	2
80.2775	206.354	1343.08	398.923	78.549	267.926	2343.44	703.414	0.527832	Burn 24	24	2	2
79.3205	458.521	1570.03	593.205	77.6178	268.507	1996.3	655.596	0.68507	Burn 24	24	2	2
76.2234	528.064	1568.09	632.769	80.5719	336.334	2082.41	667.595	0.710392	Burn 24	24	2	2
73.8027	497.782	1455.3	619.004	82.6056	342.245	2078.79	636.808	0.698387	Burn 24	24	2	2
78.5925	481.585	1616.46	618.461	80.1893	311.889	2120.17	662.73	0.669586	Burn 24	24	2	2
83.0297	474.347	1580.73	607.208	82.4877	285.971	1680.85	521.294	0.556669	Burn 24	24	2	2
75.5849	481.495	1934.43	723.042	71.2432	311.829	2636.43	969.769	0.696113	Burn 24	24	2	2
79.6675	477.495	1927.66	674.799	78.7189	284.513	2255.47	700.454	0.625266	Burn 24	24	2	2
71.9558	584.84	1516.32	707.961	79.0571	340.731	2184.08	733.411	0.708409	Burn 24	24	2	2
81.7293	408.577	2119.67	626.023	79.1669	326.555	2352.92	748.973	0.713614	Burn 24	24	2	2
88.2706	425.592	1785.64	553.784	84.0232	335.87	2233.3	638.468	0.720763	Burn 24	24	2	2
82.5471	326.364	1714.22	522.528	78.9179	254.395	2103.62	643.075	0.61891	Burn 24	24	2	2
79.5933	366.688	1933.83	636.343	76.4189	293.594	2296.94	755.118	0.655237	Burn 24	24	2	2
84.8011	385.255	1624.64	511.591	82.624	321.252	2221.19	644.774	0.706419	Burn 24	24	2	2
79.303	263.631	1571.05	502.023	78.8864	182.954	2229.31	623.802	0.548918	Burn 24	24	2	2
86.1885	357.391	1661.76	504.076	81.5025	285.584	1764.07	552.126	0.648934	Burn 24	24	2	2
82.8535	323.481	1578.14	504.057	79.8012	255.34	1839.47	575.4	0.625015	Burn 24	24	2	2
80.6758	244.096	1098.26	379.973	82.037	240.042	1486.61	427.318	0.660114	Burn 24	24	3	2
87.7906	320.936	1216.11	408.913	79.6614	253.426	1191.27	425.271	0.685451	Burn 24	24	3	2
87.1955	329.946	1359.7	427.696	81.9811	264.616	1273.97	437.242	0.685821	Burn 24	24	3	2
83.3574	326.04	1555.9	481.156	78.6307	286.845	1926.6	633.694	0.696187	Burn 24	24	3	2
81.0314	320.872	1854.07	548.332	78.3437	289.748	2176.91	694.132	0.67583	Burn 24	24	3	2
80.5598	311.137	1753.84	531.948	77.0628	303.667	2304.21	753.121	0.634336	Burn 24	24	3	2
84.4638	319.06	1837.42	494.001	80.4495	297.844	2020.86	630.55	0.684897	Burn 24	24	3	2
86.413	325.121	1602.46	468.082	80.7621	262.767	1559.78	506.115	0.675238	Burn 24	24	3	2
81.5552	287.739	953.742	383.319	80.3321	260.449	1237.56	423.349	0.671445	Burn 24	24	3	2
85.5713	329.16	1522.36	467.068	82.2524	315.127	1680.56	548.319	0.695284	Burn 24	24	3	2
82.7237	255.838	1355.96	402.668	78.933	288.934	2135.33	666.402	0.671741	Burn 24	24	3	2
78.0337	291.938	1775.74	582.593	74.086	280.815	2300.06	795.981	0.682187	Burn 24	24	3	2
85.0746	371.68	1659.51	522.169	78.8606	272.768	1658.31	568.255	0.692886	Burn 24	24	3	2
79.6872	394.607	2052.58	653.934	74.6739	335.792	2276.61	823.735	0.695974	Burn 24	24	3	2
82.2609	268.448	1518.22	447.377	75.4689	219.998	2011.86	665.693	0.655448	Burn 24	24	3	2
80.3035	352.593	1889.76	606.013	75.7459	326.708	2250.92	786.479	0.685185	Burn 24	24	3	2
77.7604	333.882	1673.13	556.278	74.0806	310.3	2344.5	814.275	0.682502	Burn 24	24	3	2
79.4154	256.204	1625.84	499.011	74.7555	285.192	2460.35	828.054	0.685809	Burn 24	24	3	2
79.553	337.28	1722.78	545.038	75.9555	336.334	2098.79	743.623	0.690133	Burn 24	24	3	2
69.9775	436.507	746.956	477.771	81.4656	306.752	1054.99	429.264	0.670107	Burn 24	24	3	2
80.8662	415.158	1066.91	495.239	83.1543	291.492	1210.07	429.658	0.650382	Burn 24	24	3	2
76.2393	481.107	2467.9	842.485	73.514	306.431	2418.17	862.902	0.682588	Burn 24	24	3	2
74.7676	500.405	2130.08	810.873	68.765	370.819	2515.43	1020.52	0.70611	Burn 24	24	3	2
74.5664	280.268	1581.67	553.947	79.7597	163.604	1685.25	473.18	0.587721	Burn 24	24	3	2
80.4083	299.13	1870.92	553.934	72.2433	238.037	2411.89	837.193	0.728921	Burn 24	24	3	2
81.3259	302.698	1507.06	481.087	80.7572	291.748	2091.8	626.373	0.642366	Burn 24	24	3	2
81.7068	248.79	1128.21	364.9	79.9214	208.13	1397.7	394.145	0.692524	Burn 24	24	3	2
82.529	241.327	1355.66	393.462	80.1781	216.002	1468.32	456.086	0.657616	Burn 24	24	3	2
82.7034	228.569	1129.99	350.933	81.1885	214.996	1262.1	395.691	0.637874	Burn 24	24	3	2
82.2868	190.376	1250.93	343.044	80.9676	196.593	1878.94	511.709	0.677891	Burn 24	24	3	2
84.1028	421.373	1532.47	543.809	82.1804	306.612	1817.21	567.212	0.691257	Burn 24	24	3	2
82.3386	284.319	1708.62	491.815	77.7149	308.015	2362.58	752.285	0.699477	Burn 24	24	4	2
82.8503	221.79	1470.31	399.944	78.7365	259.902	2194.43	667.86	0.644434	Burn 24	24	4	2
82.9339	167.499	1034.81	290.546	81.4877	301.594	1762.27	565.545	0.668063	Burn 24	24	4	2
79.9186	162.624	1336.52	378.109	72.1762	365.242	2366.19	905.683	0.673813	Burn 24	24	4	2
78.6088	358.012	1913.28	581.26	79.3687	343.869	2397.57	742.815	0.664284	Burn 24	24	4	2
74.1738	416.724	2344.65	838.741	69.5653	359.986	2590.81	1023.4	0.68981	Burn 24	24	4	2
80.3817	331.437	1777.66	571.859	73.7825	337.372	2225.79	814.531	0.672473	Burn 24	24	4	2
78.7977	318.363	2025.34	616.492	73.0145	401.533	2650.54	986.198	0.66221	Burn 24	24	4	2
77.5607	388.809	2057.59	699.564	75.561	339.054	2379.66	825.868	0.682601	Burn 24	24	4	2
76.9084	420.795	2112.94	715.382	74.5976	367.764	2605.35	935.391	0.72531	Burn 24	24	4	2
64.9359	357.446	1828.15	810.349	79.5488	219.644	2017.05	581.482	0.454088	Burn 24	24	4	2
91.5305	36.5305	741.541	93.5079	84.2746	206.41	1811.35	459.497	0.510236	Burn 24	24	4	2
89.3761	83.9565	1172.95	201.691	75.9652	305.579	2379.29	804.184	0.619263	Burn 24	24	4	2
93.7403	42.8525	969.801	102.106	77.5821	328.52	2629.02	841.232	0.570534	Burn 24	24	4	2
87.3709	67.2826	882.581	157.661	78.6947	289.387	2109.15	690.07	0.66564	Burn 24	24	4	2
86.0574	138.787	904.18	230.47	80.7804	190.286	1246.41	368.746	0.515483	Burn 24	24	4	2
79.2221	294.208	1724.65	531.994	77.7245	348.226	2399.09	793.496	0.658912	Burn 24	24	4	2
74.634	280.457	1763.35	616.297	75.6214	435.75	2559.72	907.525	0.525717	Burn 24	24	4	2
82.3224	207.853	1481.03	406.746	37.5915	734.401	2745.7	1966.41	0.78902	Burn 24	24	4	2
80.8226	316.671	1478.5	502.249	81.7784	785.335	3584.51	1240.14	0.567836	Burn 24	24	4	2
78.5286	294.059	1283.56	448.498	82.5786	770.973	3274.02	1165.01	0.579773	Burn 24	24	4	2
78.4814	381.45	1850.01	601.557	81.2075	968.815	3684.14	1475.38	0.665064	Burn 24	24	4	2
81.8723	279.53	1311.52	406.84	82.6255	307.691	1747.48	515.699	0.552429	Burn 24	24	4	2
82.617	318.206	1842.07	538.038	76.6927	259.462	2251.69	719.832	0.633056	Burn 24	24	4	2
79.5024	316.635	1892	579.464	75.1298	337.637	2318.06	822.566	0.651859	Burn 24	24	4	2
74.7314	356.28	2314.95	736.457	68.875	562.142	3520.83	1428.13	0.693216	Burn 24	24	4	2
76.6088	390.976	2100.08	684.969	70.3267	354.525	2568.43	1001.01	0.705445	Burn 24	24	4	2
81.4095	229.336	1257.01	383.341	80.6617	271.08	1855.21	574.303	0.676375	Burn 24	24	4	2
78.97	258.297	1717.34	525.756	73.3656	275.826	2290.47	809.821	0.684669	Burn 24	24	4	2
80.7867	316.072	1877.75	545.126	76.7028	283.256	2207.13	744.16	0.711668	Burn 24	24	4	2
82.3459	205.614	1320.44	372.193	78.4036	238.986	2014.86	619.361	0.669831	Burn 24	24	4	2
83.4447	225.096	1279.67	367.011	82.1409	254.524	1550.91	477.905	0.664711	Burn 24	24	4	2
80.6005	262.754	1544.33	477.601	76.5193	497.1	2613.94	980.703	0.624489	Burn 24	24	4	2
80.859	186.773	1082.62	311.713	80.1759	289.927	2099.88	554.305	0.692649	Burn 24	24	5	2
82.0911	226.725	1308	380.059	80.189	309.521	2179.62	677.678	0.681508	Burn 24	24	5	2
84.2693	150.304	1167.68	291.042	82.8226	196.974	1668.4	446.38	0.491747	Burn 24	24	5	2
81.9197	194.554	1035.68	318.575	83.4902	282.794	1743.65	518.091	0.637028	Burn 24	24	5	2
79.7149	196.988	1687.79	461.974	70.1359	355.432	2556.62	1003.93	0.649929	Burn 24	24	5	2
83.0588	187.422	1332.19	351.743	78.3403	332.154	2232.47	730.329	0.644856	Burn 24	24	5	2
78.1784	143.195	1312.83	374.429	78.8741	256.994	2001.36	614.82	0.565688	Burn 24	24	5	2
80.4914	187.967	1098.36	330.608	79.2962	328.806	2339.25	739.192	0.693698	Burn 24	24	5	2
84.5498	131.212	1289.93	291.258	68.6278	265.224	2171.66	848.927	0.669827	Burn 24	24	5	2
83.6254	140.162	1244.19	300.994	79.2373	254.739	2118.13	635.543	0.559455	Burn 24	24	5	2
80.0995	236.758	1462.88	448.708	81.6254	333.885	2176.89	668.586	0.649374	Burn 24	24	5	2
79.2919	211.444	1834.26	513.84	71.8418	392.587	2636.28	1007.67	0.646527	Burn 24	24	5	2
84.7979	171.442	1058.2	286.567	83.4378	262.581	1817.1	480.369	0.569332	Burn 24	24	5	2
81.3166	212.179	1427.81	401.988	76.7378	319.715	2384.61	784.194	0.676286	Burn 24	24	5	2
80.36	342.068	1883.23	598.824	76.705	390.544	2553.34	874.629	0.643608	Burn 24	24	5	2
83.2342	283.405	1450.02	450.215	80.6632	264.766	2124.58	614.435	0.620229	Burn 24	24	5	2
78.7741	255.538	1584.41	484.865	75.6649	277.004	2247.2	752.718	0.60385	Burn 24	24	5	2
80.0525	284.305	1605.78	509.848	72.1582	440.506	2484.57	998.335	0.674645	Burn 24	24	5	2
81.0106	277.886	1617.62	486.024	75.5358	410.971	2401.21	881.012	0.659284	Burn 24	24	5	2
85.677	238.837	1229.96	344.4	83.3759	163.913	1393.22	321.532	0.480652	Burn 24	24	5	2
73.0627	335.092	1270.4	439.09	84.1358	296.15	2198.12	508.633	0.623122	Burn 24	24	5	2
87.1554	392.815	1543.1	495.679	84.3702	305.716	1809.12	536.003	0.668551	Burn 24	24	5	2
81.3733	344.035	1516.95	512.76	81.4196	269.238	2065.25	598.886	0.607406	Burn 24	24	5	2
81.0044	397.044	1909.97	635.549	76.3234	271.038	2262.01	726.3	0.63155	Burn 24	24	5	2
86.6487	323.966	1564.07	467.202	82.5455	228.613	1544.21	455.186	0.535792	Burn 24	24	5	2
80.4931	423.639	1905.31	636.788	77.5206	337.49	2164.13	743.998	0.673754	Burn 24	24	5	2
82.3186	128.878	870.814	239.604	82.4059	297.175	1858.56	518.106	0.580698	Burn 24	24	5	2
86.0304	85.566	884.932	188.658	81.1768	198.015	1719.26	514.902	0.538996	Burn 24	24	5	2
84.5152	152.442	1286.9	303.962	75.5022	286.453	2585.64	847.782	0.670334	Burn 24	24	5	2
81.6758	147.117	994.948	276.233	81.517	281.472	1798.8	556.975	0.648027	Burn 24	24	5	2
81.692	320.586	1703.25	500.638	75.7735	276.332	2342.55	770.277	0.656072	Burn 24	24	5	2
86.0881	316.53	1458.61	443.46	82.6368	266.604	1625.5	488.246	0.63559	Burn 24	24	5	2
82.2195	279.815	1610.59	472.271	78.2688	251.424	2277.22	691.12	0.647845	Burn 24	24	5	2
82.4682	271.836	1572.65	461.123	77.1046	268.356	2247.59	719.506	0.641198	Burn 24	24	5	2
80.7981	239.081	1539.01	453.523	81.3886	208.441	2088.98	556.589	0.591822	Burn 24	24	5	2
80.7046	329.941	1785.98	559.875	75.6516	301.366	2239.32	776.309	0.659987	Burn 24	24	5	2
85.2808	310.905	1644.25	472.204	82.7551	281.323	1864.64	545.571	0.617959	Burn 24	24	5	2
84.7327	229.578	1484.76	396.835	82.4514	188.556	1885.7	493.122	0.564039	Burn 24	24	5	2
70.875	386.45	2286.97	830.828	62.8948	255.685	3231.51	1359.32	0.75566	Burn 24	24	1	3	201
78.3133	376.688	1563.5	558.251	77.6978	335.135	2618.99	840.831	0.810759	Burn 24	24	1	3
75.3308	329.051	1569.8	590.867	79.0391	200.377	2153.77	617.24	0.581441	Burn 24	24	1	3
83.6693	319.209	1703.92	506.482	81.8503	284.143	2370.3	659.482	0.738504	Burn 24	24	1	3
78.3844	365.771	1640.18	582.515	79.742	286.996	2397.95	711.725	0.675964	Burn 24	24	1	3
67.1596	402.268	1985.87	792.001	70.9597	253.739	2416.32	880.146	0.663772	Burn 24	24	1	3
72.854	374.619	1737.67	682.621	77.2218	235.516	2370.01	721.651	0.615981	Burn 24	24	1	3
76.5729	439.395	1887.75	704.562	73.2006	305.919	2795.61	957.497	0.773275	Burn 24	24	1	3
77.653	338.675	1689.32	590.822	80.2119	208.544	2157.18	597.922	0.588787	Burn 24	24	1	3
78.8079	308.089	1561.68	534.681	81.0992	199.867	2141.18	575.335	0.62686	Burn 24	24	1	3
79.0695	290.117	1442.08	503.552	82.0175	220.882	2166.5	581.412	0.615357	Burn 24	24	1	3
80.767	326.427	1691.14	559.145	80.3838	242.762	2378.59	662.694	0.668949	Burn 24	24	1	3
76.6353	317.655	1620.91	583.115	79.7432	209.879	2270.76	634.568	0.613507	Burn 24	24	1	3
77.8508	325.394	1571.57	564.903	80.4813	221.238	2209.81	610.75	0.605743	Burn 24	24	1	3
81.0689	305.487	1477.01	483.304	83.6909	245.015	2195.2	559.888	0.647959	Burn 24	24	1	3
80.018	304.851	1490.29	512.882	83.3344	199.967	2010.98	510.486	0.606953	Burn 24	24	1	3
81.3936	314.111	1560.87	514.128	81.6115	238.574	2312.35	617.458	0.636809	Burn 24	24	1	3
76.1966	295.09	1301.93	505.855	82.249	227.22	1930.58	523.529	0.607805	Burn 24	24	1	3
77.759	339.905	1546.92	565.359	79.8142	230.865	2168.34	625.719	0.612924	Burn 24	24	1	3
75.2845	319.596	1667.35	604.752	77.9905	201.95	2316.04	671.876	0.569662	Burn 24	24	1	3
78.1242	420.884	1869.21	647.652	78.8377	313.316	2494.82	776.088	0.764445	Burn 24	24	1	3
76.8765	342.492	1645.2	614.432	80.4327	203.124	2043.77	562.604	0.534969	Burn 24	24	1	3
82.8347	336.813	1494.67	491.7	84.596	255.254	2138.72	547.222	0.666314	Burn 24	24	1	3
79.3279	313.297	1555.25	528.616	80.2729	225.061	2312.3	643.626	0.680736	Burn 24	24	1	3
75.9073	344.962	1704.06	631.124	79.4011	209.163	2123.9	606.077	0.594392	Burn 24	24	1	3
78.5845	315.022	1599.6	566.079	83.1088	197.935	2036.49	510.468	0.575068	Burn 24	24	1	3
79.1015	324.824	1620.94	547.845	77.5652	264.267	2534.81	777.039	0.733064	Burn 24	24	1	3
71.2148	310.436	1553.17	606.804	78.9556	189.989	2086.46	585.89	0.55664	Burn 24	24	1	3
76.4779	340.707	1653.88	605.399	79.9658	225.909	2257.88	633.968	0.624545	Burn 24	24	1	3
70.9824	329.654	1672.55	662.09	76.5166	210.181	2417.07	726.441	0.630851	Burn 24	24	1	3
80.6751	297.39	1494.33	489.3	81.2324	234.523	2286.44	622.512	0.659432	Burn 24	24	1	3
77.7481	351.369	1656.37	600.041	81.8586	231.803	2205.75	587.39	0.593472	Burn 24	24	1	3
76.4208	322.557	1582.79	573.416	80.0415	201.414	2199.61	600.506	0.597661	Burn 24	24	1	3
79.8979	321.739	1457.12	508.149	82.686	211.989	2196.61	554.841	0.646172	Burn 24	24	1	3
76.0312	322.452	1620.58	591.96	79.4764	206.536	2204.64	616.604	0.607599	Burn 24	24	1	3
79.686	304.194	1534.95	512.557	80.4386	222.192	2259.01	625.19	0.663125	Burn 24	24	1	3
79.3656	320.814	1583.46	545.713	80.2877	241.991	2197.7	633.986	0.631677	Burn 24	24	1	3
79.5873	295.55	1450.88	503.255	83.0451	217.511	2152.36	545.366	0.614305	Burn 24	24	1	3
77.4143	343.821	1597.67	581.741	79.0227	238.109	2189.88	644.64	0.623957	Burn 24	24	1	3
80.3773	301.469	1527.15	507.162	81.7293	220.391	2218.39	587.268	0.644338	Burn 24	24	1	3
78.7862	323.169	1610.81	558.586	80.5743	260.455	2367.93	668.961	0.675697	Burn 24	24	1	3
80.9807	255.044	1112.04	396.266	87.4029	177.262	1854.06	390.261	0.575106	Burn 24	24	1	3
79.1506	313.031	1467.76	519.103	82.265	229.397	2131.6	581.074	0.627956	Burn 24	24	1	3
75.8374	446.798	1675.81	641.451	74.2617	373.66	2850.22	999.337	0.836004	Burn 24	24	1	3
74.8992	447.885	1936.5	720.638	74.3382	341.347	2587.11	912.967	0.81505	Burn 24	24	1	3
74.4379	365.527	1975.85	709.079	73.0775	322.458	2638.47	928.31	0.810696	Burn 24	24	1	3
80.6412	461.804	2379.67	700.58	71.3784	379.178	2964.54	1113.9	0.783944	Burn 24	24	1	3
76.2757	450.009	1831.76	666.783	75.0249	362.023	2717.92	939.206	0.840452	Burn 24	24	1	3
74.598	427.525	1713.63	634.347	77.2706	359.134	2789.54	894.318	0.824726	Burn 24	24	1	3
76.0855	435.045	1946.76	704.543	71.6546	356.524	2903.02	1064.23	0.82134	Burn 24	24	1	3
83.5054	271.688	1273.96	416.514	86.7892	173.994	1857.21	398.306	0.58613	Burn 24	24	2	3
72.8432	336.24	1780.35	654.684	73.6601	280.935	2710.65	914.501	0.675558	Burn 24	24	2	3
80.8063	321.067	1664.41	542.131	81.2292	239.446	2216.85	611.286	0.651719	Burn 24	24	2	3
83.1623	277.922	1468.67	459.04	83.0721	181.669	2120.19	517.1	0.625075	Burn 24	24	2	3
82.9065	323.906	1699.15	506.673	71.9359	361.535	2602.04	981.016	0.774383	Burn 24	24	2	3
81.9145	304.405	1440.03	491.017	86.1832	173.746	1898.49	415.686	0.555865	Burn 24	24	2	3
81.1181	313.694	1537.27	479.916	79.9657	238.547	2731.86	699.883	0.711943	Burn 24	24	2	3
78.6025	326.297	1517.72	553.932	83.2924	202.83	1970.49	500.752	0.590961	Burn 24	24	2	3
82.1967	270.186	1261.1	412.308	86.4787	189.354	2300.49	477.675	0.616317	Burn 24	24	2	3
80.9277	286.712	1452.97	492.521	86.3191	159.493	1891.1	397.558	0.557477	Burn 24	24	2	3
77.6481	306.132	1514.66	544.013	81.7585	192.99	2227.47	577.502	0.601768	Burn 24	24	2	3
82.4569	309.251	1461.32	474.865	83.1434	243.44	2255.59	579.909	0.648392	Burn 24	24	2	3
77.2966	316.101	1485.98	548.726	82.3619	191.196	2074.16	527.899	0.567126	Burn 24	24	2	3
78.751	280.81	1393.16	494.309	84.7231	165.2	1922.02	437.342	0.527642	Burn 24	24	2	3
81.9694	288.64	1458.61	479.772	83.8841	170.48	1927.43	454.476	0.562398	Burn 24	24	2	3
80.9128	299.107	1459.3	494.087	84.5678	194.114	1980.99	469.632	0.571371	Burn 24	24	2	3
81.8756	297.247	1471.06	485.271	85.8809	190.72	1995.11	443.857	0.526911	Burn 24	24	2	3
77.2127	348.852	1590.08	594.869	81.4994	199.465	1975.07	526.386	0.515435	Burn 24	24	2	3
79.5375	317.862	1535.08	535.671	81.8261	212.688	2106.75	557.772	0.573871	Burn 24	24	2	3
80.6544	294.281	1530.59	498.802	82.4977	201.413	2152.04	539.384	0.640965	Burn 24	24	2	3
75.8306	325.254	1527.76	580.527	81.8538	192.44	2045.57	528.272	0.527146	Burn 24	24	2	3
76.2273	311.855	1477.51	562.121	83.7785	184.161	1942.97	468.987	0.505372	Burn 24	24	2	3
79.6598	374.578	1512.24	547.961	81.8672	301.748	2348.82	672.02	0.761187	Burn 24	24	3	3
80.7892	345.412	1521.84	534.354	79.5371	296.843	2400.22	731.586	0.76533	Burn 24	24	3	3
78.8294	363.709	1562.2	553.743	77.1443	350.064	2765.51	883.322	0.77417	Burn 24	24	3	3
80.6382	338.967	1648.25	522.087	80.2832	323.386	2627.94	765.239	0.766992	Burn 24	24	3	3
73.2112	443.237	2278.43	811.769	71.0565	377.213	3080.15	1147.64	0.795134	Burn 24	24	3	3
74.4307	408.724	2213.23	712.175	73.3779	333.58	2691.39	958.054	0.809373	Burn 24	24	3	3
78.4273	394.222	1707.43	599.657	72.1944	321.752	2861.64	1005.06	0.811618	Burn 24	24	3	3
80.6507	354.838	1642.71	553.063	79.169	299.973	2487.86	753.398	0.75238	Burn 24	24	3	3
75.4359	331.086	1739.87	620.933	74.6646	350.032	2811.14	978.519	0.759199	Burn 24	24	3	3
73.0913	545.336	2093.88	835.545	64.7127	437.11	2864.54	1273.11	0.808905	Burn 24	24	3	3
74.5553	474.993	2393.54	830.819	68.2247	434.244	3037.64	1243.08	0.806189	Burn 24	24	3	3
74.6092	439.911	1613.5	670.206	69.2427	369.942	2697.61	1055.08	0.822592	Burn 24	24	3	3
73.9755	525.157	2062.41	805.345	71.884	412.45	2838.35	1077.16	0.848708	Burn 24	24	3	3
76.9764	317.368	1633.44	577.755	78.737	207.012	2287.68	652.94	0.597554	Burn 24	24	3	3
76.5852	328.579	1472.05	549.386	80.1483	220.184	2262.57	626.916	0.62458	Burn 24	24	3	3
75.9137	351.715	1835.82	650.513	73.1689	269.464	2578.97	898.618	0.694463	Burn 24	24	3	3
75.7918	317.023	1574.24	570.983	74.7548	224.22	2517.76	800.939	0.676052	Burn 24	24	3	3
75.8591	329.587	1616.5	584.884	77.1825	222.6	2491.04	735.988	0.625294	Burn 24	24	3	3
77.089	297.32	1440.52	527.237	83.1172	228.486	2043.72	525.556	0.594649	Burn 24	24	3	3
80.1209	308.675	1469.29	501.979	82.1304	209.012	2251.67	574.725	0.588921	Burn 24	24	3	3
79.5136	278.008	1288.08	454.465	82.9468	206.587	2273.2	552.48	0.612414	Burn 24	24	3	3
76.6312	319.038	1491.45	550.879	79.1718	227.735	2168.35	641.901	0.601493	Burn 24	24	3	3
80.5257	339.473	1597.6	536.823	78.0841	220.877	2361.8	692.708	0.655941	Burn 24	24	3	3
66.6094	410.115	2345.61	932.989	56.1856	304.283	3167.15	1552.93	0.742107	Burn 24	24	3	3
67.3069	429.717	1951.03	815.596	69.6306	232.888	2388.51	883.242	0.579338	Burn 24	24	3	3
71.8341	342.404	1845.78	714.056	72.4889	222.088	2730.34	914.533	0.645291	Burn 24	24	3	3
81.7949	349.306	1770.33	560.824	80.5557	286.484	2300.11	675.531	0.675434	Burn 24	24	3	3
80.1589	343.711	1631.45	554.55	81.0858	258.602	2311.9	648.707	0.677195	Burn 24	24	3	3
77.2518	298.268	1378.43	508.181	83.2331	230.665	2010.78	525.448	0.566357	Burn 24	24	3	3
75.9772	360.664	1807.84	658.809	76.8605	234.773	2276.5	711.812	0.641037	Burn 24	24	3	3
80.0365	352.889	1772.18	584.464	78.5906	270.127	2436.99	729.953	0.682832	Burn 24	24	3	3
79.6486	297.455	1415.68	496.595	81.6749	254.636	2298.23	624.094	0.657745	Burn 24	24	3	3
78.227	300.044	1580.92	537.752	78.79	206.021	2329.21	664.212	0.643675	Burn 24	24	3	3
80.2583	313.584	1447.95	510.511	82.837	216.896	2112.55	550.888	0.629912	Burn 24	24	3	3
77.0653	345.372	1496.54	575.666	81.1357	214.4	2045.22	564.136	0.604	Burn 24	24	3	3
75.1578	368.29	1611.17	636.69	80.4648	206.901	1969.6	551.802	0.538355	Burn 24	24	3	3
76.5849	305.806	1587.61	568.921	82.8307	186.76	2030.41	507.8	0.507565	Burn 24	24	3	3
62.1687	511.282	2348.88	1015.11	68.908	273.148	2419.02	933.451	0.515194	Burn 24	24	3	3
79.1502	326.128	1497.33	520.6	80.4755	242.324	2304.38	648.885	0.675725	Burn 24	24	3	3
78.5134	365.135	1701.81	583.813	76.268	290.548	2444.85	804.007	0.77643	Burn 24	24	3	3
81.0104	366.476	1729.85	572.405	78.9913	326.496	2558.3	784.739	0.762692	Burn 24	24	3	3
58.1185	502.088	2443.77	1154.6	66.6874	243.935	2541.69	1006.32	0.548855	Burn 24	24	3	3
81.5184	285.394	1343.09	458.029	84.8118	204.576	2115.53	497.199	0.617609	Burn 24	24	3	3
79.065	285.819	1450.17	488.496	81.2745	213.174	2161.83	578.93	0.628733	Burn 24	24	3	3
74.2102	454.676	1923.46	735.674	70.3195	366.8	2927.83	1114.59	0.811531	Burn 24	24	3	3
83.4784	280.847	1359.38	437.018	86.9057	176.314	1976.89	414.926	0.549062	Burn 24	24	3	3
76.1056	482.889	1854.03	726.944	71.1155	347.707	2569.69	981.75	0.811823	Burn 24	24	3	3
81.3666	277.231	1339.76	440.823	82.964	199.883	2129.73	532.941	0.634759	Burn 24	24	4	3
82.393	291.778	1378.46	452.92	81.8008	255.548	2295.72	629.047	0.695072	Burn 24	24	4	3
82.146	303.85	1471.36	460.272	81.5644	210.713	2541.85	642.214	0.66858	Burn 24	24	4	3
82.4851	328.297	1675.2	530.02	81.4973	234.027	2173.97	601.6	0.674914	Burn 24	24	4	3
79.8948	265.981	1225.16	445.485	86.986	176.676	1764.17	386.249	0.540711	Burn 24	24	4	3
82.0098	284.647	1509.44	467.309	80.5245	209.951	2217	610.681	0.662955	Burn 24	24	4	3
78.1111	382.224	1612.6	574.918	79.4359	325.028	2609.48	790.143	0.792724	Burn 24	24	4	3
79.8239	318.845	1465.99	500.39	79.2437	283.73	2308.72	701.803	0.741056	Burn 24	24	4	3
77.8965	343.267	1674.19	579.335	75.8887	325.574	2524.69	850.762	0.735628	Burn 24	24	4	3
81.7259	277.375	1380.08	444.289	82.973	227.166	2386.09	603.887	0.651822	Burn 24	24	4	3
79.9988	293.732	1413.58	476.38	82.3475	232.846	2139.18	565.052	0.655545	Burn 24	24	4	3
78.0819	376.077	1748.82	610.656	78.5247	288.491	2396.74	735.988	0.745789	Burn 24	24	4	3
80.1138	317.177	1597.47	528.332	77.9838	247.655	2433.16	721.926	0.703235	Burn 24	24	4	3
73.7894	447.394	1706.73	640.749	75.3679	324.625	2767.53	902.383	0.833608	Burn 24	24	4	3
75.5038	426.08	1848.76	687.087	74.7619	347.182	2583.4	904.051	0.765747	Burn 24	24	4	3
76.5397	332.628	1443.98	548.359	80.8537	252.353	2255.34	633.899	0.686582	Burn 24	24	4	3
81.58	363.364	1857.4	594.794	81.3146	309.271	2575.78	725.382	0.75231	Burn 24	24	4	3
75.2884	396.901	1931.47	709.2	72.3413	340.783	2708.04	972.1	0.75285	Burn 24	24	4	3
77.8293	372.708	1721.75	602.615	76.3155	284.136	2424.56	800.169	0.707977	Burn 24	24	4	3
83.2517	319.504	1551.95	476.125	77.3105	216.992	2610.12	760.084	0.724505	Burn 24	24	4	3
69.1523	473.846	2138.63	859.038	73.224	253.568	2373.35	817.406	0.654606	Burn 24	24	4	3
79.5815	364.693	1578.26	559.306	79.3359	306.723	2462.37	748.669	0.761979	Burn 24	24	4	3
78.0013	409.446	1665.86	619.615	75.3431	343.884	2706.72	903.8	0.797341	Burn 24	24	4	3
79.8089	328.289	1606.06	532.792	80.5495	236.514	2408.23	661.946	0.716605	Burn 24	24	4	3
83.4466	297.752	1560.28	472.227	82.9325	215.164	2211.85	555.514	0.683448	Burn 24	24	4	3
79.4801	286.432	1365.3	478.411	83.6364	203.051	2069.66	513.521	0.623804	Burn 24	24	4	3
79.2617	271.228	1321.47	459.276	83.71	213.867	2206.1	543.337	0.637708	Burn 24	24	4	3
77.3371	306.376	2055.1	647.199	68.6191	390.283	3127.61	1233.63	0.756336	Burn 24	24	5	3
74.8161	448.498	1930.08	728.032	72.6601	367.103	2955.28	1051.67	0.794625	Burn 24	24	5	3
76.7931	397.312	1969.11	703.736	74.4082	337.241	2704.5	928.406	0.764246	Burn 24	24	5	3
80.942	310.502	1595.24	516.928	80.7624	260.009	2447.57	683.512	0.685847	Burn 24	24	5	3
83.2008	301.439	1470.34	457.724	83.3833	252.476	2195.78	573.446	0.648495	Burn 24	24	5	3
79.8726	180.038	1190.42	349.804	79.3445	189.293	1785.44	518.976	0.677711	Burn 24	24	5	3
81.3617	347.96	1486	504.017	81.6426	283.308	2417.18	667.353	0.717185	Burn 24	24	5	3
81.2597	377.478	1585.85	562.657	82.7081	296.308	2429.93	663.604	0.722793	Burn 24	24	5	3
76.268	322.1	1627.63	596.299	79.7107	213.876	2160.34	606.292	0.567754	Burn 24	24	5	3
80.0979	302.368	1608.46	509.433	80.2152	259.814	2436.32	683.792	0.642241	Burn 24	24	5	3
77.9211	342.695	1890.79	617.011	79.8054	241.088	2267.08	650.271	0.627512	Burn 24	24	5	3
75.1102	325.204	1700.85	621.705	76.3739	185.062	2312.04	713.912	0.62363	Burn 24	24	5	3
78.6715	330.973	1693.45	556.366	78.2465	244.951	2375.79	710.998	0.703406	Burn 24	24	5	3
80.1637	322.3	1563.74	519.86	80.097	248.068	2356.4	667.93	0.693955	Burn 24	24	5	3
74.4556	317.15	1494.3	565.217	79.4268	235.551	2207.36	638.305	0.596896	Burn 24	24	5	3
78.5148	322.832	1598.18	554.035	80.0709	213.51	2162.78	602.894	0.629849	Burn 24	24	5	3
78.3084	319.289	1623.65	561.295	79.1117	237.017	2323.71	672.75	0.642676	Burn 24	24	5	3
78.8339	289.813	1526.02	512.06	81.7389	208.062	2288.49	591.104	0.637948	Burn 24	24	5	3
78.0636	379.743	1696.89	599.682	75.5319	247.097	2534.63	801.815	0.729052	Burn 24	24	5	3
79.9924	333.473	1705.28	558.684	79.741	268.141	2419.12	698.663	0.675247	Burn 24	24	5	3
80.7876	341.345	1816.28	577.152	79.0115	265.815	2465.1	724.547	0.670315	Burn 24	24	5	3
77.1278	404.917	2196.15	693.61	76.6936	317.521	2665.88	860.792	0.762491	Burn 24	24	5	3
80.7965	325.581	1544.34	513.685	81.4227	266.888	2273.23	638.792	0.692564	Burn 24	24	5	3
79.4909	301.476	1501.4	522.691	84.2342	177.639	1952.93	464.066	0.555686	Burn 24	24	5	3
79.8519	298.834	1467.66	504.852	83.7899	192.39	2084.41	506.181	0.584127	Burn 24	24	5	3
79.2023	307.563	1528.93	514.78	80.7539	257.414	2501.71	700.57	0.678105	Burn 24	24	5	3
77.8731	342.957	1690.59	592.352	79.9413	232.727	2332.23	654.109	0.655016	Burn 24	24	5	3
77.4359	276.922	1302.87	469.184	83.257	206.004	2196.94	543.054	0.630824	Burn 24	24	5	3
77.9658	320.352	1731.15	595.275	79.4441	227.914	2319.44	657.436	0.641008	Burn 24	24	5	3
79.4953	303.536	1613.51	535.952	80.6627	230.024	2405.82	648.415	0.653382	Burn 24	24	5	3
79.9504	295.377	1491.12	497.714	83.2074	197.544	2077.7	518.785	0.608369	Burn 24	24	5	3
78.3793	360.554	1605.64	580.72	80.2697	270.347	2339.29	684.068	0.709845	Burn 24	24	5	3
80.2756	328.925	1756.56	542.016	79.0518	234.85	2374.69	680.712	0.707497	Burn 24	24	5	3
78.6589	313.464	1661.3	554.719	76.6992	241.883	2450.89	752.75	0.68532	Burn 24	24	5	3
83.7875	339.82	1605.73	495	83.7558	298.362	2295.28	618.962	0.717302	Burn 24	24	5	3
77.8278	375.673	1898.37	631.115	78.3014	296.498	2593.66	792.611	0.776093	Burn 24	24	5	3
78.5591	318.881	1609.91	555.762	80.3937	233.63	2245.72	633.609	0.659772	Burn 24	24	5	3
79.4423	318.943	1667.19	549.066	79.1515	251.049	2499.67	724.656	0.713674	Burn 24	24	5	3
77.3852	330.632	1607.58	569.08	78.656	213.711	2374.36	675.948	0.684905	Burn 24	24	5	3
82.3581	310.959	1662.15	496.615	77.5647	218.947	2242.46	669.976	0.730459	Burn 24	24	5	3
80.0497	323.294	1476.84	512.921	82.4185	232.124	2170.04	583.318	0.68342	Burn 24	24	5	3
80.3714	320.285	1459.83	506.258	83.3555	235.494	2115.84	553.335	0.666922	Burn 24	24	5	3
81.1119	357.483	1526.37	529.326	82.8799	277.246	2277.85	614.966	0.707034	Burn 24	24	5	3
74.5365	503.694	1954.94	774.192	75.7573	361.883	2590.85	899.868	0.814918	Burn 24	24	5	3
73.4226	502.972	2233.08	807.245	74.2217	453.258	3250.98	1127.81	0.843882	Burn 24	24	5	3
73.716	278.062	1264.18	559.087	81.5433	192.64	2181.56	553.05	0.705763	Burn 24	24	5	3
77.9008	419.627	1801.82	646.717	76.9412	353.703	2817.06	911.335	0.823312	Burn 24	24	5	3
77.3074	389.865	2105.93	703.477	70.5174	381.206	2891.91	1107.97	0.794579	Burn 24	24	5	3
78.236	396.317	1857.05	641.268	76.0782	324.097	2592.75	868.335	0.771665	Burn 24	24	5	3
77.6561	442.121	1976.24	690.131	77.7921	381.238	2823.37	913.469	0.809036	Burn 24	24	5	3
72.1469	515.949	1780.34	801.884	79.9239	318.551	2866.23	829.765	0.829675	Burn 24	24	5	3
79.472	349.213	1735.73	571.602	80.1636	264.63	2323.88	671.961	0.715381	Burn 24	24	5	3
76.9683	442.439	1481.31	614.564	83.0554	377.259	2523.47	728.204	0.832791	Burn 24	24	5	3
75.448	385.479	1921.58	642.288	76.363	291.314	2751.85	866.327	0.792023	Burn 24	24	5	3
77.1618	472.907	1892.43	717.211	76.554	316.44	2592.61	849.52	0.790688	Burn 24	24	5	3
76.7123	346.125	1876.13	637.965	70.3914	404.369	2524.08	1025.94	0.725332	Burn 72	72	1	1	332
82.0555	338.801	1692.1	524.208	80.1518	338.343	2417.32	738.622	0.731068	Burn 72	72	1	1
80.9973	335.894	1422.64	447.011	79.4853	309.362	2301.96	710.881	0.740476	Burn 72	72	1	1
75.9473	336.759	2171.87	705.776	66.0892	575.798	2997.23	1366.54	0.744949	Burn 72	72	1	1
82.8699	168.438	1007.6	293.944	81.9238	240.939	1683.53	492.794	0.560682	Burn 72	72	1	1
83.5611	317.057	965.801	375.548	74.0713	368.076	2715.52	976.738	0.808218	Burn 72	72	1	1
82.0517	338.124	1738.48	523.829	78.4821	335.438	2363.69	767.757	0.725795	Burn 72	72	1	1
84.6497	342.175	1688.36	477.326	80.6417	344.964	2574.45	763.782	0.741899	Burn 72	72	1	1
81.8969	282.538	1366.61	432.07	79.8398	325.472	1994.75	621.088	0.780202	Burn 72	72	1	1
76.7535	307.902	1539.63	550.09	73.2366	362.56	2503.64	930.192	0.693043	Burn 72	72	1	1
79.3601	315.935	1668.85	549.494	74.3847	307.401	2163.61	775.723	0.722552	Burn 72	72	1	1
74.8304	320.313	1920.61	664.872	68.8008	409.822	2861.63	1144.76	0.733013	Burn 72	72	1	1
81.3588	260.96	1787.51	506.182	73.5018	327.134	2617.84	940.465	0.665122	Burn 72	72	1	1
75.9439	263.516	1906.31	588.047	69.7698	303.549	2677.74	1008.34	0.699918	Burn 72	72	1	1
80.9225	265.005	1969.5	558.305	42.7	401.891	2970.46	1881.81	0.790181	Burn 72	72	1	1
81.6564	250.859	1713.43	482.572	70.4308	276.216	2320.74	886.623	0.679274	Burn 72	72	1	1
90.5463	102.229	885.301	170.921	79.3363	150.41	1828.41	497.671	0.530414	Burn 72	72	1	1
88.6738	102.926	946.137	191.681	71.4063	235.285	2347.38	855.897	0.58738	Burn 72	72	1	1
80.4769	345.834	2107.91	620.576	71.6932	374.946	2619.64	1003.63	0.734597	Burn 72	72	1	1
74.2642	330.124	2277.91	734.545	64.6298	369.622	2959.07	1265.11	0.736048	Burn 72	72	1	1
74.7553	327.523	2134.77	705.827	61.1755	382.294	3023.38	1368.45	0.758179	Burn 72	72	1	1
79.0805	277.818	1846.95	563.714	61.6748	320.54	2752.56	1252.16	0.71384	Burn 72	72	1	1
84.3834	186.327	1144.84	325.196	73.3412	242.049	1884.45	684.689	0.624993	Burn 72	72	1	1
72.5406	368.727	2439.98	839.639	63.4307	443.491	3185.29	1384.83	0.723179	Burn 72	72	1	1
90.6992	106.931	797.044	163.636	75.6816	155.963	2035.92	621.277	0.541512	Burn 72	72	1	1
77.947	349.285	2188.4	680.532	69.8796	385.498	3030.11	1150.01	0.751654	Burn 72	72	1	1
80.8217	314.978	1765.62	519.884	74.7171	344.128	2550.49	886.387	0.726842	Burn 72	72	1	1
83.0832	325.729	1681.2	493.779	80.1493	334.519	2298.06	719.037	0.724916	Burn 72	72	1	1
80.8639	247.824	1282.01	402.077	78.0032	319.995	2479.53	760.225	0.691915	Burn 72	72	1	1
72.3776	348.727	1996.2	708.791	68.1922	660.737	3868.84	1565.08	0.776294	Burn 72	72	1	1
73.9522	416.288	2513.27	856.838	75.5042	1070.66	5706.15	2168.63	0.977844	Burn 72	72	1	1
81.7786	316.009	2051.55	570.373	77.5299	337.605	2400.62	793.506	0.719417	Burn 72	72	1	1
77.4101	281.073	1806.55	570.582	71.608	382.913	3096.77	1121.19	0.685191	Burn 72	72	1	1
77.8271	389.773	2272.6	751.4	69	763.699	3471.08	1543.35	0.750832	Burn 72	72	1	1
92.6845	114.183	938.121	169.606	88.9474	44.614	1655.61	223.593	0.529901	Burn 72	72	1	1
78.8612	274.023	1858.01	566.32	69.2832	313.22	2783.66	1035.85	0.699294	Burn 72	72	1	1
73.7666	356.668	2082.23	754.317	67.8677	392.093	3200.57	1266.52	0.724617	Burn 72	72	1	1
75.7036	310.16	1488.42	514.45	74.6483	331.647	2482.34	857.677	0.724914	Burn 72	72	1	1
83.1178	310.844	1421.03	449.958	81.5316	334.749	2164.54	639.159	0.723596	Burn 72	72	1	1
81.0337	287.85	1452.04	463.75	75.0799	288.687	2027.99	717.113	0.627855	Burn 72	72	1	1
80.1249	238.939	1644.86	457.817	76.2888	494.488	3195.22	1120.99	0.642309	Burn 72	72	1	1
78.1869	405.837	2335.91	690.704	75.2817	399.601	2511.3	902.769	0.720656	Burn 72	72	1	1
76.7329	405.261	2208.71	737.075	74.5608	680.135	3329.81	1330.4	0.769356	Burn 72	72	1	1
76.7616	298.671	1608.22	555.608	73.7807	411.103	2576.98	964.745	0.720443	Burn 72	72	1	1
79.7729	299.167	1943.07	573.202	71.8895	337.682	2834.98	1019.84	0.701741	Burn 72	72	1	1
77.4022	343.414	2370.18	712.489	71.3618	503.444	3107.15	1225.31	0.744044	Burn 72	72	1	1
73.0158	363.898	2232.12	755.404	68.9595	480.966	3128.77	1275.16	0.720287	Burn 72	72	1	1
81.329	290.153	1504.32	458.647	80.2816	320.309	2163.05	676.827	0.698576	Burn 72	72	1	1
80.4467	234.99	1301.4	395.019	81.3409	288.294	2002.71	592.948	0.698967	Burn 72	72	1	1
79.1636	303.287	2013.47	591.535	72.0137	340.603	2471.88	923.208	0.715943	Burn 72	72	1	1
82.0682	272.785	1543.09	452.813	78.6052	315.27	2388.53	751.25	0.671888	Burn 72	72	1	1
78.5227	363.03	1723.29	547.581	78.138	393.372	2396.28	803.734	0.733573	Burn 72	72	1	1
79.6472	315.863	1719.22	539.036	76.8307	375.07	2555.75	879.139	0.708808	Burn 72	72	1	1
75.3327	421.253	2116.04	709.87	72.7543	590.506	3390.82	1298.16	0.786882	Burn 72	72	1	1
77.4704	377.525	1764.62	611.25	77.8436	666.025	3318.01	1234.54	0.869954	Burn 72	72	1	1
75.5141	408.107	1931.49	693.569	72.7005	578.861	3316.51	1286.53	0.740752	Burn 72	72	1	1
74.6672	350.099	2060.88	713.79	71.3121	573.068	3418.92	1341.04	0.689992	Burn 72	72	1	1
75.0546	335.231	2218.61	723.87	67.4329	435.879	3143.52	1243.13	0.716717	Burn 72	72	1	1
79.6235	246.489	1824.84	516.445	73.5824	344.465	2756.18	974.655	0.667775	Burn 72	72	1	1
75.1775	352.173	2011.45	658.237	71.8579	464.521	2700.6	1066.96	0.74258	Burn 72	72	1	1
78.6983	364.629	1596.24	551.182	77.1506	471.586	2938.64	1015.19	0.772716	Burn 72	72	1	1
76.7925	418.05	2001.25	697.043	76.4792	781.632	3837.61	1475.85	0.87422	Burn 72	72	1	1
79.1075	361.429	1580.35	549.279	77.2345	457.616	2811.22	954.961	0.76133	Burn 72	72	1	1
81.1721	242.408	1630.23	459.585	78.3995	377.767	2544.34	839.739	0.64475	Burn 72	72	1	1
80.0742	353.746	2531.84	693.092	74.0755	597.822	3047.86	1216.11	0.761233	Burn 72	72	1	1
76.3499	346.973	1724.28	600.85	73.5146	578.366	3638.26	1322.27	0.743816	Burn 72	72	1	1
79.3531	313.195	2080.34	608.762	76.428	535.827	3053.02	1111.48	0.76949	Burn 72	72	1	1
76.6779	365.254	1982.42	671.986	72.0046	604.182	4135.54	1434.29	0.78252	Burn 72	72	1	1
71.1625	422.108	3115.22	890.544	75.1074	826.625	4436.37	1655.89	0.833956	Burn 72	72	1	1
77.3	363.02	1943.32	659.111	74.5501	545.466	3037.33	1126.74	0.758416	Burn 72	72	1	1
78.5032	367.26	1780.58	605.276	77.0496	536.713	3306.27	1106.22	0.749971	Burn 72	72	1	1
77.2803	361.253	2231.29	701.31	71.3755	387.684	3011.33	1056.99	0.7202	Burn 72	72	1	1
79.0105	274.829	1887.06	586.741	72.6256	293.086	2349.7	842.347	0.693945	Burn 72	72	1	1
76.2514	304.685	1898.73	593.561	73.7379	374.958	2577.42	924.163	0.707521	Burn 72	72	1	1
75.7456	351.49	1848.74	644.403	69.9907	681.622	3529.11	1485.85	0.791056	Burn 72	72	1	1
77.0101	408.228	1932.67	654.005	77.8694	681.887	3353.77	1259.22	0.759138	Burn 72	72	1	1
77.9779	302.45	2119.52	650.444	72.9923	630.06	3682.68	1420.12	0.765127	Burn 72	72	1	1
74.5764	362.495	1799.2	658.155	74.6607	558.559	3058.22	1170.95	0.752552	Burn 72	72	1	1
73.2612	375.375	2660.89	847.801	64.4197	566.104	3306.95	1494.01	0.78228	Burn 72	72	1	1
74.6877	255.329	1868.63	636.624	65.8954	340.261	2691.18	1130.55	0.715504	Burn 72	72	1	1
80.5439	262.33	1613.5	472.361	77.2133	369.764	2527.91	842.856	0.683245	Burn 72	72	1	1
78.6131	357.989	1393.57	495.193	79.2883	390.537	2586.41	751.204	0.828074	Burn 72	72	1	1
79.9373	367.532	1549.69	537.304	78.5803	327.72	2518.05	769.433	0.715205	Burn 72	72	1	1
80.2053	198.959	1381.83	350.752	72.3944	448.189	3085.65	1122.81	0.663784	Burn 72	72	1	1
78.934	366.68	1524.37	535.952	77.5921	339.472	2270.39	744.983	0.703908	Burn 72	72	1	1
76.8428	395.082	1858.27	642.768	77.1272	518.033	2821.85	1025.08	0.75261	Burn 72	72	1	1
74.3179	439.661	2056.12	756.101	73.5622	563.211	3132.55	1214.94	0.773459	Burn 72	72	1	1
78.913	336.182	1725.82	560.591	72.6833	343.504	2149.39	823.319	0.720952	Burn 72	72	1	1
76.6367	364.188	1836.32	657.15	71.6863	471.498	2469.74	1019.21	0.713245	Burn 72	72	1	1
78.0317	307.596	2371.52	699.1	67.5628	513.093	3127.36	1330.04	0.748279	Burn 72	72	1	1
75.241	367.673	1786.74	638.154	70.5218	363.161	2443.31	957.917	0.733981	Burn 72	72	1	1
68.5074	387.512	2200.1	849.494	63.9998	387.382	2860.16	1274.59	0.749586	Burn 72	72	1	1
83.2184	209.305	1235.85	348.761	82.1495	280.958	2012.08	540.32	0.713288	Burn 72	72	1	1
82.353	417.119	1491.43	541.988	79.9968	303.286	2256.02	607.011	0.916397	Burn 72	72	1	1
78.4294	320.229	1571.9	509.56	77.5085	389.518	2434.95	821.676	0.816289	Burn 72	72	1	1
78.5598	366.694	1865.48	595.523	76.6194	381.877	2419.84	838.28	0.830084	Burn 72	72	1	1
78.2869	379.764	1953.87	618.198	76.6495	483.984	3218.16	1015.99	0.844858	Burn 72	72	1	1
77.1061	429.591	1611.56	634.558	75.7174	423.691	2834.99	990.545	0.768041	Burn 72	72	1	1
83.1554	266.984	1428.22	433.246	78.3831	306.435	2169.5	692.892	0.682669	Burn 72	72	1	1
78.593	343.813	1766.55	560.285	76.5985	507.956	2960.98	1052.22	0.771932	Burn 72	72	1	1
81.567	412.437	1758.72	597.87	75.8213	410.189	2452.33	873.857	0.814362	Burn 72	72	1	1
77.9287	301.403	1817.61	566.345	76.0875	781.775	3438.72	1389.39	0.807597	Burn 72	72	1	1
79.3273	239.351	1635.39	448.93	77.2366	631.358	3684.8	1277.33	0.819964	Burn 72	72	1	1
76.8011	385.741	1812.94	610.259	78.2176	531.368	2757.03	990.376	0.843917	Burn 72	72	1	1
79.6935	340.655	1823.58	558.792	77.5349	398.688	2735.71	909.031	0.760733	Burn 72	72	1	1
80.0102	329.674	1748.89	571.873	76.963	357.284	2320.21	785.801	0.734075	Burn 72	72	1	1
77.7383	325.54	1832.23	597.786	71.1652	469.728	2932.46	1139.69	0.731161	Burn 72	72	1	1
77.007	372.987	1767.13	628.673	74.2297	416.567	2622.15	969.306	0.763742	Burn 72	72	1	1
75.7823	357.352	1870.01	654.12	72.5704	666.785	3284	1325.03	0.842284	Burn 72	72	1	1
93.8729	284.824	2579.28	414.792	80.68	387.777	3426.54	703.789	0.989093	Burn 72	72	1	1
80.5894	267.42	1620.53	482.652	79.4139	350.69	2622.69	719.093	0.834759	Burn 72	72	1	1
85.0033	298.884	1543.81	444.943	79.4427	326.109	2062.18	670.882	0.6947	Burn 72	72	1	1
80.5229	327.73	1495.92	488.726	76.4052	318.615	2146.13	731.179	0.706446	Burn 72	72	1	1
72.9826	346.876	1946.32	706.315	69.2967	595.025	3281.44	1347.47	0.772986	Burn 72	72	1	1
79.5958	324.644	1494.16	504.17	77.4214	355.405	2285.18	756.632	0.782612	Burn 72	72	1	1
83.9823	327.531	1588.87	484.855	79.3413	324.313	2108.73	679.133	0.727362	Burn 72	72	1	1
76.1051	403.287	1710.53	660.129	69.709	396.66	2137.62	910.967	0.719433	Burn 72	72	1	1
81.4737	221.19	1513.53	431.797	74.3744	266.094	2434.04	819.673	0.673027	Burn 72	72	2	1
79.7232	315.116	1847.43	562.497	74.424	331.805	2560.76	892.529	0.723054	Burn 72	72	2	1
79.833	335.068	1543.82	513.947	79.3658	365.643	2417.45	777.89	0.726435	Burn 72	72	2	1
80.2334	352.079	1990.82	609.382	73.3697	505.117	2847.49	1114.91	0.755011	Burn 72	72	2	1
79.3848	349.269	1667.38	573.144	77.5893	346.781	2518.28	814.237	0.773873	Burn 72	72	2	1
79.8154	292.193	1706.14	520.162	74.3441	357.564	2434.55	889.992	0.715436	Burn 72	72	2	1
77.9097	437.545	2595.16	795.971	72.207	525.503	3122.91	1237.33	0.798967	Burn 72	72	2	1
82.231	332.441	1720.19	519.445	77.5656	359.061	2533.34	841.926	0.746375	Burn 72	72	2	1
82.2017	177.287	1332.58	355.185	81.8368	216.091	2069.39	529.792	0.479868	Burn 72	72	2	1
80.073	234.353	1548.46	446.309	72.6436	293.021	2633.33	923.42	0.681725	Burn 72	72	2	1
81.5964	264.504	1662.07	475.552	75.8823	283.424	2299.3	772.909	0.676951	Burn 72	72	2	1
81.0937	256.635	1945.09	520.932	69.5193	330.805	2923.36	1098.94	0.707567	Burn 72	72	2	1
79.1118	316.297	1875.26	585.382	71.9835	373.594	2788.68	1033.85	0.748476	Burn 72	72	2	1
80.0467	326.837	1721.54	537.761	77.841	298.768	1951.17	651.077	0.70664	Burn 72	72	2	1
85.4722	150.639	1084.19	263.507	82.9495	104.745	1769	235.651	0.333408	Burn 72	72	2	1
80.7235	222.957	1410.87	414.277	77.2551	242.72	2178.92	676.724	0.594169	Burn 72	72	2	1
80.3673	199.328	1354.71	400.127	78.0995	212.703	2099.21	628.965	0.510937	Burn 72	72	2	1
79.694	178.332	1219.14	361.897	82.4809	173.222	1777.55	452.47	0.40459	Burn 72	72	2	1
82.795	181.53	1332.89	357.031	81.1554	190.142	1864.41	508.554	0.471786	Burn 72	72	2	1
81.2679	278.38	1729.4	475.23	74.3827	357.594	2635.63	922.687	0.725407	Burn 72	72	2	1
83.1661	270.322	1623.48	442.693	74.6144	425.031	2663.15	981.931	0.648234	Burn 72	72	2	1
80.1826	253.178	1569.44	453.908	75.8064	694.595	3653.71	1381.56	0.772123	Burn 72	72	2	1
80.3271	316.926	1948.38	561.53	77.4039	700.912	4289.44	1357.45	0.918775	Burn 72	72	2	1
74.0615	370.347	1361.11	524.062	78.5125	570.591	2721.57	1017.78	0.985338	Burn 72	72	2	1
74.5776	307.991	1807.04	634.437	71.9077	614.827	3277.97	1336.73	0.694607	Burn 72	72	2	1
78.4218	220.468	1852.7	504.392	74.6538	565.53	3110.61	1185.96	0.68714	Burn 72	72	2	1
85.2162	187.078	1582.23	374.077	73.4328	416.167	2845.18	1048.43	0.645265	Burn 72	72	2	1
77.075	334.225	1877.9	632.335	75.8197	810.899	4350.85	1612.14	1	Burn 72	72	2	1
75.4933	119.405	1068.8	179.377	72.9487	700.44	3897.02	1501.17	0.726199	Burn 72	72	2	1
81.3828	427.371	3660.74	767.271	78.5188	642.437	3468.53	1231.04	0.898305	Burn 72	72	2	1
81.9632	212.163	1255.17	366.16	79.9063	885.138	4050.15	1499.31	0.993149	Burn 72	72	2	1
82.0895	280.845	2042.1	596.218	79.2758	626.92	3741.28	1231.6	0.850803	Burn 72	72	2	1
77.4473	317.975	1794.45	583.19	79.8466	715.733	3105.38	1201.47	1	Burn 72	72	2	1
80.8104	359.222	1798.93	565.424	78.1529	703.819	5366.63	1570.01	0.998616	Burn 72	72	2	1
78.7204	335.937	1921.5	621.564	78.5499	833.195	3823.31	1454.01	1	Burn 72	72	2	1
78.4221	274.576	1961.81	584.01	77.1764	368.203	2534.81	845.729	0.735094	Burn 72	72	2	1
81.1366	251.662	1489.07	422.707	76.8707	378.435	2339.79	825.491	0.702276	Burn 72	72	2	1
85.0367	186.737	1460.82	348.411	72.4962	387.912	2788.17	1038.2	0.682192	Burn 72	72	2	1
79.6351	220.602	1384.14	417.343	72.2939	461.855	2851.1	1108.04	0.687147	Burn 72	72	2	1
82.0885	165.732	1021.23	288.136	78.4349	505.493	2727.17	966.411	0.7246	Burn 72	72	2	1
71.071	169.725	1434.08	316.336	78.5576	428.147	2705.33	903.497	0.58071	Burn 72	72	2	1
76.8786	340.269	2009.33	659.039	78.8955	555.608	3185.09	1061.7	0.783392	Burn 72	72	2	1
79.1722	237.918	1686.77	455.652	77.7024	479.924	2955.69	999.198	0.998695	Burn 72	72	2	1
73.2442	353.95	2095.59	724.61	77.3555	709.027	5138.38	1460.12	0.960195	Burn 72	72	2	1
81.2919	205.581	1396.44	378.907	72.4853	501.305	2908.36	1149.45	0.752797	Burn 72	72	2	1
85.9215	156.071	1249.42	299.93	72.1638	497.259	2927.37	1152.13	0.698825	Burn 72	72	2	1
87.0079	149.807	1293.6	269.014	68.8463	560.948	2634.88	1185.52	0.728732	Burn 72	72	2	1
95.675	104.684	1337.57	142.843	79.6741	462.527	2611.6	866.89	0.639179	Burn 72	72	2	1
83.702	219.94	1420.32	359.122	79.4464	296.884	2323.45	714.443	0.514693	Burn 72	72	2	1
83.4373	298.996	1844.7	485.734	77.8356	467.561	2752.94	950.81	0.557912	Burn 72	72	2	1
83.1393	368.601	1592.31	515.709	78.4924	715.462	2743.17	1111.66	0.9888	Burn 72	72	2	1
88.9975	141.923	1057.18	232.296	78.6575	560.408	3102.3	1070.21	0.807152	Burn 72	72	2	1
87.6334	136.943	938.782	212.596	75.1866	340.206	2454.88	854.471	0.720668	Burn 72	72	2	1
83.3154	228.792	1472.34	406.43	78.8445	305.731	1933.45	629.192	0.798237	Burn 72	72	2	1
89.4549	84.5066	615.469	134.866	74.2674	212.651	2122.15	705.494	0.5441	Burn 72	72	2	1
77.245	307.743	1995.8	608.314	80.2339	175.696	1985.54	553.871	0.484231	Burn 72	72	2	1
76.7817	330.896	2127.08	665.692	74.7925	297.717	2415.12	846.537	0.626639	Burn 72	72	2	1
78.7531	275.429	1890.66	535.67	83.8604	121.29	1678.15	381.94	0.384705	Burn 72	72	2	1
76.4494	276.638	1956.99	615.078	69.239	477.068	2993.37	1222.62	0.723717	Burn 72	72	2	1
76.6046	398.128	2409.84	757.555	70.2741	351.692	2722.65	1036.5	0.714608	Burn 72	72	2	1
78.2149	470.41	2703.16	821.349	75.5696	572.138	2968.89	1151.49	0.703157	Burn 72	72	2	1
77.0753	326.464	1608.59	523.538	72.7214	401.625	2677.75	1008.17	0.695061	Burn 72	72	2	1
81.5752	208.962	1555	403.009	72.158	555.487	3153.77	1239.6	0.887547	Burn 72	72	2	1
74.6911	211.807	1461.63	419.719	77.6481	757.539	3651.94	1395.23	0.946997	Burn 72	72	2	1
75.1779	367.12	2198.83	750.307	75.5892	415.695	2987.36	1036.28	0.807788	Burn 72	72	2	1
77.0371	373.548	2015.5	679.595	77.9128	533.315	3146.81	1085.58	0.704765	Burn 72	72	2	1
82.4903	326.114	1689.99	511.026	78.6145	516.289	2834.51	954.322	0.987328	Burn 72	72	2	1
91.568	89.4415	652.939	133.312	79.3291	380.062	2757.34	814.8	1	Burn 72	72	2	1
86.6392	200.29	1149.09	316.885	67.352	403.939	2812.05	1182.09	0.734979	Burn 72	72	2	1
81.9938	275.356	1673.3	493.373	73.6659	471.801	2709.5	1047.37	0.749492	Burn 72	72	2	1
83.2592	217.225	1454.17	386.779	78.8058	358.053	2217.13	715.091	0.765499	Burn 72	72	2	1
73.9748	388.114	1934.87	690.987	88.2316	70.5631	1667.67	264.556	0.293016	Burn 72	72	2	1
79.0995	306.039	1708.32	554.228	80.8509	400.692	2469.27	793.39	0.552723	Burn 72	72	2	1
82.8108	256.576	1523.78	441.761	65.0224	661.94	3357.67	1534.33	0.715771	Burn 72	72	2	1
81.0229	260.795	2272.85	547.712	75.4389	502.747	2882.43	1064.3	0.630957	Burn 72	72	2	1
91.9915	95.2041	698.137	140.433	77.6605	682.931	3504.07	1285.49	0.850316	Burn 72	72	2	1
92.9445	75.1384	550.27	106.737	74.0523	380.244	2612.27	947.765	0.684992	Burn 72	72	2	1
86.6945	191.787	1205.02	306.623	74.9901	328.076	2539.29	877.636	0.65502	Burn 72	72	2	1
81.0736	292.821	1723.05	516.347	70.0078	744.339	3751.23	1583.28	0.691234	Burn 72	72	2	1
85.2742	212.636	1404.51	363.046	86.7976	72.0589	1752.5	305.731	0.323545	Burn 72	72	2	1
77.5436	397.488	1895.3	660.539	88.4146	94.1796	1847.49	298.47	0.296651	Burn 72	72	2	1
75.0351	431.204	2157.32	783.96	79.4029	281.795	2342.28	708.492	0.559966	Burn 72	72	2	1
77.8749	312.886	2719.51	659.533	65.4423	528.879	2971.47	1361.58	0.690376	Burn 72	72	2	1
76.4482	339.403	2026.51	624.624	76.168	452.575	2644.91	967.078	0.60579	Burn 72	72	2	1
78.4487	453.801	2521.51	787.333	76.4583	536.197	3171.41	1133.4	0.748921	Burn 72	72	2	1
78.281	319.871	1726.11	548.825	75.733	587.104	2862.43	1132.99	0.724626	Burn 72	72	2	1
77.3962	350.614	1753.2	585.705	76.5235	602.919	3165.25	1191.84	0.840865	Burn 72	72	2	1
82.6259	261.72	1460.13	430.251	79.1227	286.883	2084.15	652.243	0.665897	Burn 72	72	3	1
79.402	328.994	1765.8	561.618	74.0392	319.411	2377.42	843.868	0.74054	Burn 72	72	3	1
82.6211	316.07	1867.49	523.825	74.1678	332.852	2461.29	871.197	0.774582	Burn 72	72	3	1
77.359	352.095	3820.33	777.512	72.7522	288.563	2664.93	893.636	0.761447	Burn 72	72	3	1
79.1627	294.45	1479.86	505.727	76.7846	325.643	2806.99	894.573	0.705344	Burn 72	72	3	1
77.7539	352.244	2072.59	612.503	74.2634	408.441	2698.13	977.887	0.74145	Burn 72	72	3	1
76.5858	304.8	1964.54	621.834	70.8552	424.199	2911.25	1108.34	0.728439	Burn 72	72	3	1
83.0289	307.794	1692.64	505.932	77.4244	303.429	2330.44	747.826	0.728135	Burn 72	72	3	1
79.1044	329.874	1819.2	572.13	72.6032	375.186	2534.85	954.615	0.741511	Burn 72	72	3	1
78.6382	299.359	1646.16	522.029	70.8481	400.008	2814.59	1094.06	0.718977	Burn 72	72	3	1
81.7869	319.355	1477.6	474.537	78.7657	310.185	2140.37	693.615	0.701323	Burn 72	72	3	1
81.4146	318.447	1989.52	571.985	73.4845	609.212	3199.31	1259.1	0.74354	Burn 72	72	3	1
79.1906	272.431	2040.36	578.123	71.416	358.372	2749.78	1039.18	0.72358	Burn 72	72	3	1
81.5899	315.664	1617.22	506.433	78.1567	345.307	2365.83	778.905	0.716922	Burn 72	72	3	1
91.7834	120.475	1254.6	209.397	86.1112	82.7677	844.148	176.786	0.964075	Burn 72	72	3	1
92.2982	88.843	895.984	144.299	88.0211	103.811	1475.65	213.474	0.389498	Burn 72	72	3	1
76.8383	359.75	2081.52	691.168	66.8829	398.074	2862.03	1190.87	0.735278	Burn 72	72	3	1
79.0421	350.96	1794.33	576.011	77.2418	361.133	2576.09	835.55	0.827195	Burn 72	72	3	1
70.8433	343.817	2301.1	805.034	64.5221	657.668	3886.3	1668.32	0.763271	Burn 72	72	3	1
75.8664	338.108	1850.1	619.591	73.3832	370.593	2735.62	983.159	0.713201	Burn 72	72	3	1
75.224	406.965	1994.6	740.07	68.5495	451.253	2963.24	1214.72	0.739099	Burn 72	72	3	1
72.6763	427.792	2784.54	900.284	64.6429	623.027	3737.66	1543.06	0.760042	Burn 72	72	3	1
75.0093	362.533	2394.89	760.89	72.8352	518.226	3029.9	1164.96	0.676726	Burn 72	72	3	1
74.7673	381.574	2139.4	743.783	74.8102	585.386	3091.06	1195.2	0.72496	Burn 72	72	3	1
78.824	335.5	1981.97	617.319	73.6964	457.658	2806.86	1055.27	0.693482	Burn 72	72	3	1
78.7016	386.227	1990.16	646.796	71.8878	422.068	3097.7	1148.31	0.692429	Burn 72	72	3	1
82.9589	306.468	1504.89	459.009	77.7124	334.714	2277.39	746.506	0.764483	Burn 72	72	3	1
80.2576	256.721	1350.14	415.002	80.0518	280.052	2152.88	629.862	0.664958	Burn 72	72	3	1
88.8726	143.746	1070.29	238.084	86.6889	118.127	1467.66	325.443	0.467908	Burn 72	72	3	1
82.7764	185.599	1406.06	380.143	79.8413	196.896	1884.3	536.93	0.579848	Burn 72	72	3	1
81.8162	185.366	1949.97	416.804	77.2165	567.435	3444.23	1206.85	0.625835	Burn 72	72	3	1
74.3244	405.799	2361.17	812.803	71.6265	578.151	3093.62	1264.94	0.706155	Burn 72	72	3	1
70.8691	302.979	2252.68	772.046	68.438	626.625	3178.11	1421.84	0.700993	Burn 72	72	3	1
81.1512	321.102	1677.81	525.98	80.7031	336.833	2268.34	669.125	0.770567	Burn 72	72	3	1
81.9246	321.467	1686.18	489.019	77.5814	324.452	2419.73	768.664	0.721923	Burn 72	72	3	1
74.2173	367.884	2316.23	755.084	74.8764	683.549	3467.82	1370.99	0.734103	Burn 72	72	3	1
70.4963	417.865	3567.81	1044.47	73.8685	580.557	3172.91	1236.48	0.69516	Burn 72	72	3	1
78.4624	316.019	1830.57	581.699	74.0183	382.489	2427.73	896.558	0.697209	Burn 72	72	3	1
73.631	419.298	2129.22	769.203	72.7936	577.49	3143.9	1264.24	0.748235	Burn 72	72	3	1
77.1363	342.514	2011.86	654.205	71.26	534.885	3067.15	1238.62	0.740309	Burn 72	72	3	1
75.8653	372.597	2058.81	683.172	72.9767	457.392	2963.95	1121.03	0.730253	Burn 72	72	3	1
77.4005	388.149	1980.18	693.797	71.7334	401.598	3063.57	1115.36	0.704837	Burn 72	72	3	1
76.1544	365.277	1975.9	655.708	70.2388	472.949	3293.86	1300.71	0.71598	Burn 72	72	3	1
78.5605	362.413	2280.21	677.162	73.3079	684.448	3334.19	1358.73	0.778179	Burn 72	72	3	1
73.5604	335.198	2088.44	710.131	68.8509	581.422	3066.81	1329.36	0.697434	Burn 72	72	3	1
75.3878	342.805	2059.45	680.683	72.1884	454.305	2883.11	1089.66	0.701909	Burn 72	72	3	1
78.2329	331.353	1946.48	615.869	73.0964	339.587	2572.82	908.616	0.712742	Burn 72	72	3	1
73.2869	354.996	2170.43	762.052	68.5834	568.755	2971.35	1301.63	0.71501	Burn 72	72	3	1
76.009	372.075	2157.16	709.802	73.9946	465.646	3088.35	1126.5	0.716566	Burn 72	72	3	1
75.8233	368.959	1961.71	680.216	66.1901	496.923	2999.28	1315.73	0.753684	Burn 72	72	3	1
74.8876	413.222	2255.61	778.658	72.4129	617.695	3005.58	1248.15	0.731283	Burn 72	72	3	1
80.0601	226.227	1469.04	447.97	67.3021	316.56	2466.27	1019.72	0.637794	Burn 72	72	3	1
72.4924	428.073	2696.99	916.419	69.1349	673.482	3303.64	1469.69	0.743263	Burn 72	72	3	1
74.3733	386.391	2294.38	776.826	68.0182	571.093	3217.88	1365.18	0.730538	Burn 72	72	3	1
83.4123	218.644	1578.54	416.646	77.1336	370.402	2527.15	860.697	0.631587	Burn 72	72	3	1
77.2501	329.288	1885.26	621.401	74.01	472.412	2856.94	1068.26	0.706203	Burn 72	72	3	1
76.8629	346.063	1929.96	628.767	72.5221	451.536	2996.44	1118.33	0.716953	Burn 72	72	3	1
76.76	339.325	2035.43	647.194	71.8688	446.89	3004.94	1149.26	0.716439	Burn 72	72	3	1
75.4618	334.779	2235.3	735.332	69.14	630.433	3161.97	1388.56	0.703301	Burn 72	72	3	1
77.161	323.184	1985.94	597.424	73.6948	351.108	2866.64	982.985	0.70083	Burn 72	72	3	1
80.0011	300.059	1511.7	488.328	76.9462	405.384	2388.57	849.306	0.694896	Burn 72	72	3	1
81.8369	265.587	1724.09	482.335	74.757	527.33	2928.58	1114.06	0.661317	Burn 72	72	3	1
75.1975	293.537	2370.94	728.902	65.2069	600.39	3315.87	1499.06	0.696216	Burn 72	72	3	1
91.5529	147.249	895.805	202.306	86.3467	53.1825	1725.78	282.506	0.451916	Burn 72	72	3	1
81.9204	198.356	1327.4	384.545	73.5621	147.84	2155.05	689.833	0.438194	Burn 72	72	3	1
80.1536	212.225	1700.51	483.258	63.4588	343.61	2502.97	1150.14	0.655833	Burn 72	72	3	1
73.7989	322.806	3459.81	802.996	68.094	1030.63	4365.98	1943.37	0.86502	Burn 72	72	3	1
81.4649	295.746	2248.37	604.911	73.4319	629.483	3590.6	1340.91	0.739963	Burn 72	72	3	1
76.3842	369.056	2057.07	696.831	68.1074	708.221	3956.41	1623.73	0.813351	Burn 72	72	3	1
76.8623	338.363	1671.56	552.125	79.5399	367.582	2639.54	812.806	0.889708	Burn 72	72	3	1
80.2741	246.857	1569.04	472.291	74.4742	286.341	2395.84	800.164	0.706272	Burn 72	72	3	1
80.5222	279.475	2066.64	561.415	71.5514	307.333	2660.07	975.341	0.716786	Burn 72	72	3	1
80.1507	248.656	1515.22	470.556	77.1116	241.459	2129.25	694.614	0.593446	Burn 72	72	3	1
83.4999	296.21	1502.18	440.067	79.616	310.11	2498.27	727.492	0.747134	Burn 72	72	3	1
76.6992	295.879	1806.96	587.651	70.9146	480.175	3071.34	1212.53	0.723528	Burn 72	72	3	1
79.8465	298.081	1654.04	502.519	73.678	311.145	2696.04	944.319	0.725418	Burn 72	72	3	1
80.7955	246.325	1478.39	447.725	73.3593	337.445	2416.64	895.906	0.689668	Burn 72	72	3	1
74.8738	335.563	1702.54	613.626	70.8445	554.98	3081.78	1263.83	0.727884	Burn 72	72	3	1
84.9651	185.604	1553.64	385.02	76.5094	437.39	2921.42	1038.27	0.586097	Burn 72	72	3	1
78.3548	280.301	1965.79	577.851	70.5165	415.138	3276.22	1188.23	0.706202	Burn 72	72	3	1
79.4282	232.477	1691.27	487.235	73.1333	326.003	2887.96	996.646	0.659844	Burn 72	72	3	1
78.5901	261.016	1811.65	556.471	72.9201	480.448	3161	1192.37	0.682805	Burn 72	72	3	1
76.1524	240.458	2053.31	625.017	64.2215	217.627	2806.47	1134.73	0.6333	Burn 72	72	3	1
74.6455	220.78	1743.28	562.55	66.6569	213.066	2685.99	1029.5	0.595385	Burn 72	72	3	1
79.7992	289.731	1987.31	591.49	70.4356	593.703	3434.18	1384.63	0.709513	Burn 72	72	3	1
76.1425	413.382	1642.76	616.335	69.1891	714.132	6167.83	2179.35	0.749298	Burn 72	72	3	1
86.8329	160.737	1191.73	285.086	75.557	294.314	2643.83	860.468	0.587162	Burn 72	72	3	1
78.633	277.672	2252.48	557.644	63.5784	897.172	3873.91	1876.3	0.836212	Burn 72	72	3	1
82.4642	235.345	1548.36	437.774	75.8834	250.044	2259.75	784.21	0.601866	Burn 72	72	3	1
78.6343	376.026	2803.96	809.13	63.5051	522.784	3611.63	1581.79	0.774723	Burn 72	72	3	1
77.9127	331.307	1953.98	619.607	70.6922	382.976	3144.18	1175.4	0.745795	Burn 72	72	3	1
75.7941	329.949	2343.19	714.122	63.8302	576.432	3464.86	1542.52	0.781577	Burn 72	72	3	1
80.1514	297.772	1456.94	491.897	74.8818	336.191	2320.12	827.6	0.732574	Burn 72	72	3	1
90.5812	141.064	922.474	205.046	77.8157	102.256	1709.98	459.535	0.505111	Burn 72	72	3	1
77.916	271.171	1838.75	505.582	71.8991	491.307	3355.09	1248.32	0.72425	Burn 72	72	3	1
92.0136	146.772	952.309	204.26	78.4806	89.6185	1658.78	427.15	0.515282	Burn 72	72	3	1
82.1423	248.331	1490.28	439.074	71.0231	254.5	2165.61	813.388	0.673651	Burn 72	72	3	1
85.7054	167.809	1204.32	300.133	80.9762	156.719	2233.43	576.659	0.553571	Burn 72	72	3	1
91.9595	124.703	936.258	184.393	79.483	92.2903	1956.56	482.187	0.546091	Burn 72	72	3	1
74.5195	350.431	2081.9	688.381	65.7624	330.748	2858.46	1173.4	0.757415	Burn 72	72	3	1
76.557	355.191	2149.19	713.362	66.2695	355.21	2695.07	1121.6	0.750454	Burn 72	72	3	1
76.8589	354.166	2276.85	667.593	65.7259	471.892	3060.32	1343.34	0.761867	Burn 72	72	3	1
74.3659	376.247	1789.08	668.756	67.6679	350.405	2744.46	1111.59	0.74187	Burn 72	72	3	1
75.9584	301.706	2009.48	617.214	66.707	374.752	3299.24	1283.97	0.73219	Burn 72	72	3	1
85.9136	147.741	1069.53	267.963	74.2612	139.139	2241.98	707.225	0.619075	Burn 72	72	3	1
77.6053	332.372	2067.32	643.615	66.3576	383.268	3271.69	1309.25	0.74386	Burn 72	72	3	1
81.9048	296.655	1909.93	531.61	74.5393	310.906	2358.67	831.758	0.717913	Burn 72	72	3	1
81.3168	331.405	2154.97	623.279	70.5812	309.884	2548.24	958.785	0.732305	Burn 72	72	3	1
81.6993	259.832	1655.57	480.934	76.957	256.532	2149.37	703.211	0.644859	Burn 72	72	3	1
75.7258	294.621	1955.73	644.554	66.9852	333.786	2764.06	1122.91	0.730267	Burn 72	72	3	1
81.675	332.245	1821.28	549.935	74.077	303.909	2313.29	825.731	0.724259	Burn 72	72	3	1
76.3625	370.056	2088.26	682.57	71.696	359.41	2860.64	1047.66	0.731935	Burn 72	72	3	1
80.4987	242.377	1342.62	427.915	74.306	259.098	2221.23	754.119	0.689259	Burn 72	72	3	1
79.651	228.028	1885.51	534.82	71.6687	299.233	2917.57	1047.47	0.696496	Burn 72	72	3	1
83.8065	307.28	1823.7	512.172	75.2914	320.091	2332.26	817.9	0.702836	Burn 72	72	3	1
79.7161	306.407	1852.73	572.209	74.8818	334.94	2474.7	861.002	0.721431	Burn 72	72	3	1
80.583	310.212	1945.06	573.232	72.8784	306.611	2459.17	895.921	0.721138	Burn 72	72	3	1
73.8837	394.725	2313.45	811.827	67.3109	409.644	3916.12	1419.1	0.740217	Burn 72	72	3	1
76.553	335.892	2061.49	675.459	67.3923	373.918	3004.66	1213.35	0.730749	Burn 72	72	3	1
82.6182	204.805	1682.68	446.379	69.3849	263.665	2640.08	1006.88	0.648389	Burn 72	72	3	1
75.8306	277.82	2016.93	650.959	66.9452	432.442	5452.36	1453.03	0.690867	Burn 72	72	3	1
77.1675	245.946	1179.1	389.19	82.2597	309.736	2046.11	601.518	0.676684	Burn 72	72	3	1
72.2724	378.995	2211.55	778.818	67.0019	488.717	3157.01	1338.06	0.710563	Burn 72	72	3	1
75.8834	327.465	2123.65	681.813	70.5495	381.101	3059.64	1129.18	0.717671	Burn 72	72	3	1
78.4738	289.257	2074.74	603.64	68.4966	364.726	3218.94	1234.4	0.758802	Burn 72	72	3	1
81.448	275.191	1537.64	464.533	77.5444	282.054	2318.53	743.441	0.68944	Burn 72	72	3	1
76.1265	300.58	1307.62	450.61	81.9389	339.391	2583.69	639.869	0.839132	Burn 72	72	3	1
82.4889	295.971	1578.57	470.742	79.8653	313.544	2204.96	695.12	0.700393	Burn 72	72	3	1
78.722	278.035	1762.55	563.128	80.1996	832.893	3455.99	1316.1	0.703267	Burn 72	72	1	2	108
82.7646	220.387	1303.3	370.711	81.38	668.101	2984.37	1067.44	0.70109	Burn 72	72	1	2
80.2009	296.002	1682.04	500.372	79.385	788.59	3847.04	1361.26	0.722253	Burn 72	72	1	2
71.3597	611.668	1430.2	729.984	81.2826	265.731	2081.01	594.702	0.73653	Burn 72	72	1	2
71.6116	638.325	1572.15	781.68	79.4583	298.723	2300.75	703.315	0.715704	Burn 72	72	1	2
73.3989	683.344	1991.27	876.392	75.4338	243.534	2399.64	769.104	0.73873	Burn 72	72	1	2
73.4036	610.385	1737.02	780.235	75.6236	363.158	2335.43	821.473	0.730887	Burn 72	72	1	2
80.6189	334.843	1369.16	465.445	81.4141	440.841	3137.48	728.168	0.689241	Burn 72	72	1	2
81.9446	482.62	1926.08	662.072	77.5343	639.108	2827.04	1126.96	0.783968	Burn 72	72	1	2
78.8885	457.239	2177.14	741.093	73.6402	779.667	3822.4	1574.76	0.739417	Burn 72	72	1	2
79.5303	406.27	2072.34	693.543	77.5726	680.679	3110.56	1184.36	0.719731	Burn 72	72	1	2
79.3778	357.254	1917.31	619.448	74.0323	495.206	2732.28	1061.37	0.656441	Burn 72	72	1	2
75.3994	379.221	1252.5	506.609	83.1813	225.001	1996.08	464.935	0.767559	Burn 72	72	1	2
72.4461	472.095	1851.81	760.952	72.6158	468.622	2841.23	1085.3	0.69715	Burn 72	72	1	2
80.3572	367.495	1671.74	570.606	81.8124	247.365	2334.78	653.084	0.640801	Burn 72	72	1	2
78.3778	399.168	2092.35	690.543	79.3546	226.303	2439.34	687.368	0.698757	Burn 72	72	1	2
78.3857	502.341	2186.04	766.282	72.6144	355.827	2834.92	998.732	0.733722	Burn 72	72	1	2
78.0821	462.071	2149.12	747.194	74.6722	261.17	2455.21	804.736	0.739377	Burn 72	72	1	2
67.4016	605.087	1205.08	688.318	81.4713	275.518	1916.26	570.261	0.731675	Burn 72	72	1	2
67.0959	844.707	2670.18	1209.17	72.4839	551.385	3223.76	1246.19	0.707781	Burn 72	72	1	2
71.1531	671.938	1755.06	846.258	77.1613	376.562	2530.11	846.69	0.742976	Burn 72	72	1	2
75.1869	393.548	1998.78	709.588	70.3831	223.469	2517.87	897.604	0.759373	Burn 72	72	1	2
71.3605	507.699	2132.31	854.845	74.8547	390.91	2607.98	937.642	0.67318	Burn 72	72	1	2
69.673	544.28	2375.72	972.888	71.034	823.011	3938.95	1664.52	0.718725	Burn 72	72	1	2
76.2252	416.237	2012.95	662.761	76.8902	685.994	3895.71	1324.13	0.744075	Burn 72	72	1	2
72.8089	428.908	2555.25	881.217	64.6204	465.753	3287.41	1435.87	0.707657	Burn 72	72	1	2
79.9989	281.055	1618.99	504.072	74.9012	345.627	2470.97	868.764	0.71208	Burn 72	72	1	2
76.5117	377.487	1758.34	620.786	78.2469	453.456	2896.04	887.706	0.851572	Burn 72	72	1	2
72.0546	570.93	1684.52	737.886	76.8394	260.902	2459.74	759.292	0.744822	Burn 72	72	1	2
76.4578	598.295	2579.96	873.165	73.114	230.924	2401.31	811.678	0.752028	Burn 72	72	1	2
70.0802	661.148	2659.89	1029.76	69.9634	658.472	3875.05	1548.21	0.742516	Burn 72	72	1	2
66.1044	890.365	2138.43	1074.3	75.197	703.461	3828.75	1343.18	0.824849	Burn 72	72	1	2
70.2375	673.231	1632.7	815.102	78.7524	624.633	3094.3	1119.42	0.733319	Burn 72	72	1	2
74.0109	524.629	2198.75	806.974	53.7611	2181.96	7033.68	3116.9	0.736238	Burn 72	72	1	2
76.4381	463.585	2342.24	807.661	75.9102	973.368	5066.4	1903.06	0.745447	Burn 72	72	1	2
78.6875	396.857	1811.36	607.157	76.018	702.143	3505.22	1325.38	0.70064	Burn 72	72	1	2
80.8918	419.937	1561.91	565.036	76.7318	297.766	2378.88	772.635	0.716661	Burn 72	72	1	2
79.7379	366.89	1826.6	598.867	77.2459	560.727	2723.02	1041.11	0.651116	Burn 72	72	1	2
75.0976	471.785	1917.17	700.385	73.5509	703.048	3024.82	1280.98	0.733543	Burn 72	72	1	2
77.2955	499.593	1611.76	670.328	76.0922	496.77	2808.11	1015.38	0.71763	Burn 72	72	1	2
77.894	399.468	1762.9	634.975	76.9315	421.662	2583.74	912.307	0.680649	Burn 72	72	1	2
73.3929	436.804	1389.11	579.413	82.1048	398.453	2963.72	748.776	0.737972	Burn 72	72	1	2
71.0156	632.193	2470.65	992.104	64.4508	590.156	3683	1604.67	0.785932	Burn 72	72	2	2
64.8346	1011.99	2808.84	1297.38	58.2368	723.22	3877.12	1809.61	0.781174	Burn 72	72	2	2
77.259	573.875	1659.3	680.37	77.5988	327.74	2354.53	776.799	0.705381	Burn 72	72	2	2
79.3422	209.278	1979.14	537.882	69.7957	403.492	3044.2	1151.76	0.7337	Burn 72	72	2	2
78.3778	217.177	2189.52	589.433	64.5544	528.459	3089.37	1426.39	0.724249	Burn 72	72	2	2
83.7221	91.2021	1192.14	244.552	69.7597	191.96	2705.85	954.393	0.697901	Burn 72	72	2	2
83.2369	195.525	1303.82	343.029	80.984	305.911	2166.54	651.596	0.722399	Burn 72	72	2	2
82.6149	181.933	1410.38	358.084	70.1916	304.704	2495.92	950.195	0.744579	Burn 72	72	2	2
82.8832	159.18	1192.07	304.921	76.5227	288.768	2228.35	734.978	0.726872	Burn 72	72	2	2
84.9235	348.792	1811.26	531.817	77.0545	316.29	2380.69	783.063	0.72972	Burn 72	72	2	2
78.3939	285.876	1502.9	479.241	73.7783	334.495	2508.42	894.186	0.748798	Burn 72	72	2	2
83.9006	178.332	1665.49	384.358	71.5281	344.767	3168.42	1107.94	0.765064	Burn 72	72	2	2
75.6939	281.201	1903.64	559.527	75.0432	1124.41	5444.39	2145.25	0.797359	Burn 72	72	2	2
78.9566	301.407	1915.45	573.231	74.5421	1151.43	5160.67	2035.05	0.746745	Burn 72	72	2	2
76.5553	262.414	1819.27	597.936	70.1694	460.58	2776.17	1146	0.681265	Burn 72	72	2	2
68.6459	385.588	1171.13	546.8	81.8181	278.149	3374.03	572.78	0.724903	Burn 72	72	2	2
58.5373	1008.26	2864.52	1448.84	69.8984	508.248	3021.45	1250.37	0.640612	Burn 72	72	2	2
71.6665	346.02	1462.4	578.792	69.0006	344.334	2272.53	941.532	0.720799	Burn 72	72	2	2
79.0057	322.158	1869.86	579.771	74.7128	237.202	2432.47	784.266	0.744717	Burn 72	72	2	2
82.0017	474.467	2087.28	694.588	78.7756	136.525	2182.55	577.4	0.659573	Burn 72	72	2	2
79.5424	440.136	1818.35	635.09	77.9564	611.637	3241.65	1143.67	0.737851	Burn 72	72	3	2
73.0659	653.342	1903.35	863.576	76.806	279.64	2362.02	740.401	0.764304	Burn 72	72	3	2
73.0594	564.441	1780.3	744.302	77.9749	237.172	2352.45	694.647	0.759241	Burn 72	72	3	2
71.8502	649.899	2312.23	944.227	72.0346	320.935	2542.65	914.38	0.769424	Burn 72	72	3	2
71.1914	480.026	2153.19	821.665	66.8281	357.616	2574.56	1087.71	0.748719	Burn 72	72	3	2
79.0726	445.356	1785.34	629.917	77.6418	368.664	2560.56	827.341	0.773263	Burn 72	72	3	2
73.7667	487.896	1889.11	754.904	75.0117	446.545	3028.79	1001.21	0.755188	Burn 72	72	3	2
74.0461	586.361	2156.77	870.464	78.4388	1122.46	4507.85	1773.41	0.751171	Burn 72	72	3	2
64.7659	541.275	1629.25	752.094	78.6663	329.571	2445.99	765.778	0.767016	Burn 72	72	3	2
68.7605	772.102	1870.7	929.17	77.8038	689.675	3245.12	1213.95	0.736088	Burn 72	72	3	2
70.5294	678.125	1780.3	881.678	76.3047	621.263	3210.77	1230.96	0.751699	Burn 72	72	3	2
74.9592	548.277	2210.67	835.022	73.7897	852.97	4072.79	1643.25	0.764153	Burn 72	72	3	2
72.3541	542.095	2893.72	909.587	71.9587	830.487	4068.46	1596.04	0.764445	Burn 72	72	3	2
71.6198	458.723	1419.58	617.881	81.4104	563.64	3032.21	990.186	0.727684	Burn 72	72	3	2
76.7591	461.658	1655.65	615.197	78.3322	605.169	3149.42	1086.38	0.763748	Burn 72	72	3	2
81.6645	433.727	2017.43	648.569	74.7178	530.817	2915.09	1094.43	0.739113	Burn 72	72	3	2
76.6301	422.04	1978.43	653.347	74.4535	487.268	3126.58	1148.31	0.736138	Burn 72	72	3	2
76.7767	437.02	1701.31	648.587	76.617	267.084	2307.29	717.023	0.771855	Burn 72	72	3	2
80.1265	447.05	2013.23	681.293	76.3813	281.786	2293.69	747.947	0.736404	Burn 72	72	3	2
74.0871	588.912	1757.51	784.485	78.6568	361.342	2555.37	767.407	0.742082	Burn 72	72	4	2
73.8253	649.229	1945.64	861.672	70.7044	417.83	2595.54	1037.17	0.747583	Burn 72	72	4	2
73.6819	588.376	2024.36	845.474	74.3182	514.485	2951.13	1130.19	0.846829	Burn 72	72	4	2
79.7704	542.742	1981.24	735.021	78.9951	576.774	3716.52	1061.55	0.985422	Burn 72	72	4	2
69.0886	734.452	2412.84	1075.19	72.4748	709.105	5111.35	1641.53	0.830616	Burn 72	72	4	2
77.5399	348.652	1681.29	558.725	76.4526	1134.21	3877.92	1714.54	0.811926	Burn 72	72	4	2
75.7912	634.84	1974.93	831.898	74.1879	1081.61	4748.4	1944.66	0.988665	Burn 72	72	4	2
66.3802	825.738	2397.6	1148.9	75.0156	808.397	3831.03	1484.67	0.680131	Burn 72	72	4	2
75.809	594.187	1726.28	768.24	79.4156	733.489	3451.28	1266.21	0.732899	Burn 72	72	4	2
73.813	618.369	1846.17	820.954	77.7527	813.276	3713.85	1439.07	0.788868	Burn 72	72	4	2
74.7055	607.548	1930.75	812.592	75.7657	945.925	4136.03	1686.99	0.731192	Burn 72	72	4	2
75.9483	576.558	1793.88	761.685	77.7815	802.431	3877.08	1464.88	0.797331	Burn 72	72	4	2
74.3422	592.081	1766.4	768.111	76.6644	709.482	3221.95	1276.87	0.761253	Burn 72	72	4	2
76.85	448.221	1781.65	661.188	77.3313	274.668	2239.52	704.687	0.717161	Burn 72	72	4	2
74.4249	410.456	1793.47	594.782	75.2674	392.24	2186.06	795.824	0.785396	Burn 72	72	4	2
71.3766	535.822	2127.31	858.58	75.1734	394.197	2762.6	963.059	0.683053	Burn 72	72	4	2
76.1949	443.711	1922.13	685.746	78.6713	391.645	8219.02	1198.47	0.652309	Burn 72	72	4	2
76.0831	457.688	2075.86	727.404	75.195	435.037	2800.42	995.606	0.746266	Burn 72	72	4	2
80.4083	459.011	1643.19	622.293	79.616	238.024	2195.97	625.049	0.689875	Burn 72	72	4	2
76.9054	406.08	1873.87	662.656	68.155	1457.99	4188.91	2137.24	0.713574	Burn 72	72	4	2
71.6425	463.397	1504.48	630.898	75.8489	1136.39	3848.64	1714.52	0.819997	Burn 72	72	4	2
77.6132	394.018	1934.51	648.296	73.5852	323.517	2621.57	917.284	0.70192	Burn 72	72	4	2
80.3687	451.275	1686.54	622.752	76.7396	375.075	2428.62	838.241	0.731318	Burn 72	72	4	2
76.45	481.778	1767.16	678.359	78.6161	416.617	2610.81	871.821	0.723606	Burn 72	72	4	2
75.3038	542.473	1900.49	780.944	75.9915	907.844	3895.38	1603.35	0.833078	Burn 72	72	4	2
83.422	237.077	1244.45	376.627	83.4357	232.058	2355.72	493.455	0.470565	Burn 72	72	4	2
81.8375	263.426	1600.69	465.334	84.5881	209.782	1974.41	475.806	0.467715	Burn 72	72	4	2
85.5008	101.341	922.055	210.052	82.9403	202.169	2307.16	574.008	0.662041	Burn 72	72	1	3	138
78.4828	333.903	1619.07	550.088	75.8803	380.593	2807.07	954.066	0.858588	Burn 72	72	1	3
77.6074	358.676	1677.51	567.657	75.5665	418.877	3119.31	1060.62	0.865711	Burn 72	72	1	3
82.9277	115.902	931.935	242.33	83.3368	202.661	2240.47	561.484	0.612222	Burn 72	72	1	3
82.1917	152.363	1147.11	305.423	78.3004	298.179	2508.86	786.22	0.723659	Burn 72	72	1	3
80.4828	349.266	1643.37	554.063	72.6423	370.797	2800.04	1026.51	0.84729	Burn 72	72	1	3
85.5033	116.761	1026.25	232.317	80.9696	219.968	2395.06	644.287	0.640275	Burn 72	72	1	3
84.8611	110.218	978.488	230.847	82.7322	198.2	2264.15	552.207	0.634106	Burn 72	72	1	3
80.5274	107.028	863.522	243.941	82.0931	234.857	2205.51	591.798	0.644822	Burn 72	72	1	3
77.8915	368.296	1768.8	596.179	70.3338	453.077	3076.96	1202.86	0.858414	Burn 72	72	1	3
78.1806	339.516	1999.8	594.85	72.2785	403.642	3327.76	1182.19	0.852988	Burn 72	72	1	3
79.4228	323.109	1584.46	506.604	77.2374	407.513	2840.64	938.338	0.880048	Burn 72	72	1	3
79.4468	312.443	1839.68	540.931	67.0761	613.212	3616.31	1542.28	0.842059	Burn 72	72	1	3
77.4226	324.575	1921.81	597.481	67.6563	470.31	3081.36	1272.07	0.826317	Burn 72	72	1	3
82.9964	112.624	910.518	239.873	87.0705	169.902	1864.98	392.113	0.508227	Burn 72	72	1	3
84.1049	122.457	1044.27	254.347	79.7488	229.254	2288.24	656.494	0.669133	Burn 72	72	1	3
82.2306	112.216	917.427	245.101	82.3307	217.184	2356.95	594.425	0.657982	Burn 72	72	1	3
79.021	353.372	1577.86	530.778	73.0293	426.44	2765.66	1038.38	0.862705	Burn 72	72	1	3
78.1446	326.11	1532.7	512.664	75.1598	400.768	2848.94	993.552	0.866068	Burn 72	72	1	3
80.6641	259.796	1766.62	510.668	75.4173	413.784	3022.63	1024.62	0.820218	Burn 72	72	1	3
77.9498	360.584	1631.45	567.526	72.1186	526.612	3237.43	1231.43	0.903057	Burn 72	72	1	3
80.0302	273.86	1719.59	511.609	74.4989	405.852	2877.74	1018.25	0.845563	Burn 72	72	1	3
81.2962	192.551	1463.45	404.562	74.4073	319.866	2632.33	901.078	0.779766	Burn 72	72	1	3
84.8164	111.025	971.97	230.988	88.3061	162.562	1937.67	380.782	0.503704	Burn 72	72	1	3
85.5851	88.7565	879.04	195.778	88.6899	153.499	1944.78	357.006	0.496032	Burn 72	72	1	3
83.8528	137.94	1157.57	273.906	84.4853	231.217	2688.09	615.687	0.666127	Burn 72	72	1	3
76.9894	465.813	1833.66	691.65	65.145	694.341	3747.12	1623.87	0.901648	Burn 72	72	1	3
80.7978	226.415	1190.18	370.514	75.267	341.658	2485.55	874.446	0.747729	Burn 72	72	1	3
82.1935	192.556	1047.49	313.231	84.5901	391.043	4297.37	837.045	0.844527	Burn 72	72	1	3
78.4165	235.151	1384.26	426.5	74.0095	384.497	2810.51	1011.01	0.790845	Burn 72	72	1	3
80.402	295.156	1544.15	486.352	77.2416	419.059	2946.2	978.525	0.863429	Burn 72	72	1	3
77.0112	348.104	1817.46	567.14	71.08	382.149	2772.79	1048.45	0.844477	Burn 72	72	1	3
79.6171	252.559	1434.26	445.275	74.3706	349.938	2544.51	903.23	0.794241	Burn 72	72	1	3
78.9918	372.486	1696.7	565.123	72.4238	378.219	2852.53	1043.3	0.863661	Burn 72	72	1	3
78.5219	288.941	1544.7	514.894	77.4342	397.026	2608.84	876.709	0.813194	Burn 72	72	1	3
57.148	389.46	1846.52	925.784	62.2625	399.58	2421.86	1149.65	0.696347	Burn 72	72	2	3
78.9985	301.392	1467.98	489.136	77.9977	400.8	2857.94	923.967	0.856982	Burn 72	72	2	3
81.3554	179.879	1096.77	321.319	79.4507	337.597	2577.4	793.89	0.803863	Burn 72	72	2	3
79.2357	294.189	1338.68	462.819	79.0597	425.3	2772.49	906.363	0.855895	Burn 72	72	2	3
75.3265	352.179	1543.6	552.909	75.9065	477.548	3131.04	1089.72	0.898591	Burn 72	72	2	3
79.9754	327.167	1710.45	549.256	74.9011	413.344	2861.83	1011.64	0.860084	Burn 72	72	2	3
79.3946	343.557	1790.44	556.077	73.6474	411.295	2989.79	1050.94	0.861407	Burn 72	72	2	3
73.9574	344.251	1758.8	575.263	71.7922	442.18	3049.29	1137.73	0.830897	Burn 72	72	2	3
79.2717	249.144	1374.02	437.294	76.1185	431.082	2897.6	1000.56	0.840322	Burn 72	72	2	3
84.637	117.779	869.775	226.663	86.4417	188.336	2019.14	448.542	0.591642	Burn 72	72	2	3
83.8913	81.8894	828.282	197.612	88.6922	135.39	1455.64	283.71	0.520771	Burn 72	72	2	3
78.7726	340.633	1601.27	560.482	71.6487	492.177	3215.64	1208.08	0.881054	Burn 72	72	2	3
78.3487	292.842	1536.26	503.866	74.2356	394.456	2765.64	987.677	0.8359	Burn 72	72	2	3
86.3651	84.4598	782.701	175.444	88.6076	147.819	1870.44	349.087	0.526134	Burn 72	72	2	3
72.4774	310.021	1536.08	536.923	77.6587	418.897	2927.28	927.629	0.969416	Burn 72	72	2	3
82.9847	165.977	1152.34	311.965	75.5961	267.542	2463.44	800.133	0.771117	Burn 72	72	2	3
78.7804	298.246	1587.35	506.456	72.8515	426.792	3122.36	1130.98	0.861285	Burn 72	72	2	3
84.5515	99.2663	919.783	218.458	87.5554	161.986	1957.63	390.117	0.515607	Burn 72	72	2	3
80.9625	242.439	1414.01	417.899	75.107	329.12	2671.3	905.298	0.815996	Burn 72	72	2	3
77.8415	406.675	1768.66	626.514	74.4733	431.305	2799.98	1011.76	0.894019	Burn 72	72	2	3
85.618	93.7928	829.246	195.152	88.1943	152.567	1917.43	365.879	0.527656	Burn 72	72	2	3
82.4971	99.4262	839.535	219.52	82.4921	239.753	2340.67	612.287	0.674941	Burn 72	72	2	3
80.5668	243.014	1511.65	443.582	75.0887	358.234	2793.49	952.014	0.792205	Burn 72	72	2	3
84.9387	96.4815	903.7	212.993	86.6847	137.476	1799.06	374.89	0.498847	Burn 72	72	2	3
85.1294	116.64	963.612	231.803	79.4691	252.633	2506.9	711.933	0.703355	Burn 72	72	2	3
75.9256	489.625	2465.35	817.6	65.3124	516.741	3579.85	1520.12	0.91023	Burn 72	72	2	3
84.1074	151.975	1222.93	309.253	75.1642	262.26	2581.6	829.908	0.788635	Burn 72	72	2	3
80.8526	207.211	1213.93	368.837	78.15	330.747	2664.29	844.601	0.790903	Burn 72	72	2	3
79.1304	245.975	1333.6	419.27	76.6148	345.341	2590.25	859.165	0.819714	Burn 72	72	2	3
78.2794	393.003	1782.08	609.891	72.4893	514.11	3099.91	1201.07	0.871492	Burn 72	72	2	3
81.5868	257.958	1609	460.697	68.4729	480.8	3096.8	1272.89	0.85009	Burn 72	72	2	3
83.4569	121.566	949.868	245.147	81.171	231.453	2297.09	624.417	0.692575	Burn 72	72	2	3
80.4466	221.52	1435.65	420.678	72.6829	348.053	2603.51	952.101	0.812555	Burn 72	72	2	3
85.444	99.8178	872.605	205.654	85.5807	182.774	2018.76	459.274	0.602005	Burn 72	72	2	3
77.3612	216.638	1103.94	369.661	74.141	346.874	2812.56	974.945	0.833841	Burn 72	72	2	3
82.104	188.54	1163.18	332.118	77.4765	262.535	2421.05	762.34	0.739378	Burn 72	72	2	3
79.7859	304.736	1781.23	540.762	73.084	394.298	3111.17	1082.78	0.855297	Burn 72	72	2	3
77.6542	345.391	1972.53	586.535	70.4959	453.585	3720.73	1283.42	0.867957	Burn 72	72	3	3
83.9464	167.959	1096.15	291.696	80.5998	281.295	2497.23	744.942	0.710442	Burn 72	72	3	3
74.8499	307.296	1541.43	504.068	75.0096	359.67	2703.9	927.353	0.87279	Burn 72	72	3	3
83.2866	195.352	1533.67	376.401	68.7026	385.358	2942.89	1166.09	0.832022	Burn 72	72	3	3
81.8068	240.69	1514.59	441.687	73.3629	515.077	3367.37	1225.85	0.823492	Burn 72	72	3	3
77.2864	266.601	1536.91	466.658	78.4654	402.524	2980.1	930.891	0.86668	Burn 72	72	3	3
78.9348	366.242	1861.3	589.483	71.3585	446.356	3013.56	1151	0.852702	Burn 72	72	3	3
78.0965	330.809	3104.38	718.133	71.5828	394.771	2984.41	1110.56	0.855714	Burn 72	72	3	3
77.6891	466.055	1894.38	687.105	68.0965	543.199	2991.64	1306.53	0.865999	Burn 72	72	3	3
82.484	269.229	1689.28	453.208	79.3107	500.372	3448.12	1066.79	0.945064	Burn 72	72	3	3
77.9189	294.055	2504.62	537.719	70.7437	434.071	3145.58	1185.77	0.891078	Burn 72	72	3	3
80.8544	242.37	1563.97	428.456	77.1193	453.438	2951.66	1006.71	0.885191	Burn 72	72	3	3
80.1641	236.387	1403.49	414.249	74.9881	360.403	2668.38	935.615	0.822708	Burn 72	72	3	3
79.3298	284.166	1650.19	502.297	77.8018	418.059	3162.01	1013.97	0.894721	Burn 72	72	3	3
77.9422	358.935	1819.19	595.318	71.8073	484.01	3330.84	1245.81	0.871897	Burn 72	72	3	3
78.2462	295.172	1660.34	530.13	74.3483	374.643	2906.53	1007.71	0.85672	Burn 72	72	3	3
84.7685	123.535	894.541	233.329	85.127	220.957	2161.51	541.319	0.623365	Burn 72	72	3	3
85.4758	126.071	857.795	228.334	90.1901	149.964	1599.39	295.7	0.508719	Burn 72	72	3	3
76.8543	303.249	1738.73	573.113	72.098	426.521	2918.07	1103.46	0.808479	Burn 72	72	3	3
79.3924	309.805	1597.45	511.363	75.003	415.256	3136.89	1068.96	0.847357	Burn 72	72	4	3
77.3426	345.344	1671.93	580.29	73.9601	434.523	3276.15	1117.81	0.851726	Burn 72	72	4	3
84.8098	91.4672	843.19	199.194	87.478	154.986	1945	384.424	0.553644	Burn 72	72	4	3
79.0056	299.245	1718.84	517.426	69.2514	400.679	2935.59	1158.9	0.860162	Burn 72	72	4	3
75.6277	271.116	1456.36	509.922	74.1395	389.52	3043.2	1049.54	0.845145	Burn 72	72	4	3
76.2544	390.8	1732.02	635.082	71.0627	485.225	3178.42	1223.94	0.87129	Burn 72	72	4	3
80.2556	290.784	1627.01	497.043	75.3291	374.462	2786.03	959.712	0.84818	Burn 72	72	4	3
83.1739	201.536	1415.87	378.73	71.2832	301.47	2710.21	985.622	0.809636	Burn 72	72	4	3
82.1609	162.165	1236.55	324.33	76.0155	299.522	2683.86	872.05	0.768262	Burn 72	72	4	3
81.9257	365.173	1928.46	578.313	77.6376	461.676	3137.09	1039.45	0.922094	Burn 72	72	4	3
75.9713	348.159	1618.1	560.296	73.6412	374.998	3010.88	1053.5	0.882112	Burn 72	72	4	3
83.4265	183.23	1235.42	326.144	69.302	298.495	2803.09	1057.9	0.792941	Burn 72	72	4	3
82.8422	241.155	1471.97	412.263	72.7082	325.082	2715.89	965.344	0.81738	Burn 72	72	4	3
82.0812	203.793	1301.34	368.391	75.529	352.957	2872.49	974.329	0.775553	Burn 72	72	4	3
81.289	503.112	5549.48	1235.48	66.2628	355.421	2718.67	1117.7	0.944064	Burn 72	72	4	3
76.6612	379.071	1706.63	608.076	64.9794	501.546	2801.68	1280.49	0.851596	Burn 72	72	4	3
79.6231	316.368	1756.59	553.831	73.5651	382.161	2772.29	1002.34	0.825775	Burn 72	72	4	3
78.4753	417.707	2080.38	699.436	68.7954	410.714	3217.17	1267.06	0.874594	Burn 72	72	4	3
78.07	349.453	1699.03	577.251	71.6462	453.802	3296.58	1152.25	0.879027	Burn 72	72	4	3
77.4623	347.255	1918.03	626.744	67.4721	490.469	4141.19	1438.01	0.881213	Burn 72	72	4	3
77.3348	299.343	1799.35	532.009	72.086	396.402	2892.78	1078.03	0.877741	Burn 72	72	4	3
83.206	179.688	1512.87	370.088	70.0863	353.659	3019.07	1134.04	0.812783	Burn 72	72	4	3
80.2342	270.341	1602.62	480.83	71.5517	485.939	3851	1329.04	0.872236	Burn 72	72	4	3
77.5499	385.252	1895.27	612.172	71.9066	418.914	2683.58	1037.14	0.863579	Burn 72	72	4	3
80.1242	267.16	1438.22	450.683	73.121	453.531	3264.54	1156.23	0.843508	Burn 72	72	4	3
82.9429	150.125	1078.44	288.23	80.5981	244.286	2335.78	674.703	0.710464	Burn 72	72	4	3
79.8901	359.753	1839.44	584.07	74.7386	399.817	3072.66	1048.74	0.871951	Burn 72	72	4	3
79.0477	328.528	1662.97	505.002	68.3916	388.261	2858.48	1153.28	0.860675	Burn 72	72	4	3
82.9868	191.291	1249.29	335.734	78.3262	316.036	2605.22	824.032	0.781364	Burn 72	72	4	3
82.5769	132.269	955.783	265.731	85.2121	170.633	1942.07	442.695	0.575211	Burn 72	72	4	3
84.3798	123.622	1013.63	242.672	75.8965	291.914	2784.49	882.593	0.753178	Burn 72	72	4	3
88.63	87.042	1008.29	180.297	86.535	179.524	2482.47	479.611	0.544549	Burn 72	72	4	3
80.6158	107.413	945.464	253.991	79.6601	235.969	2280.33	658.712	0.657868	Burn 72	72	4	3
79.9636	325.256	1554.94	507.382	75.5693	391.012	2874.29	979.584	0.864456	Burn 72	72	4	3
82.851	182.787	1400.71	366.077	72.1821	300.068	3053.05	1052.12	0.774375	Burn 72	72	4	3
77.7332	304.05	1709	536.178	74.3357	569.81	4195.23	1400.22	0.863306	Burn 72	72	4	3
84.6292	97.1486	972.526	219.818	82.7143	185.76	2293.49	556.339	0.573133	Burn 72	72	4	3
79.4178	241.67	1636.79	468.532	73.3691	353.804	2809.15	990.318	0.832577	Burn 72	72	4	3
76.9265	398.984	1970.38	662.291	73.8285	524.054	3276.04	1206.5	0.909337	Burn 72	72	4	3
84.5536	127.299	1070.45	257.008	82.1049	236.932	2410.2	620.13	0.636076	Burn 72	72	4	3
82.0878	132.322	1022.5	274.035	79.2788	240.777	2516.42	716.292	0.697056	Burn 72	72	4	3
79.6118	312.991	1520.09	488.493	74.9705	382.007	2933.92	1001.35	0.848162	Burn 72	72	4	3
72.005	391.709	1847.69	712.799	65.2138	578.063	3248.89	1419.1	0.863746	Burn 72	72	4	3
78.1897	280.256	1550.62	516.316	71.1269	364.205	2571.93	990.278	0.823915	Burn 72	72	4	3
79.1309	246.801	1445.8	437.047	76.573	376.873	2816.15	936.075	0.830899	Burn 72	72	4	3
79.0655	324.912	1861.95	588.578	72.0784	400.036	2807.04	1054.24	0.835223	Burn 72	72	4	3
77.8615	346.829	1647.73	552.774	74.0803	423.382	2969.76	1052.29	0.871109	Burn 72	72	4	3

## Sheet: 4C-OMI index
OMI index	Group	Fish	Repeat
0.735981	Tt 24	1	1
0.684165	Tt 24	1	1
0.687619	Tt 24	1	1
0.71303	Tt 24	1	1
-0.472807	Tt 24	1	1
0.723429	Tt 24	1	1
0.733436	Tt 24	1	1
0.996599	Tt 24	1	1
0.662832	Tt 24	1	1
0.656645	Tt 24	1	1
0.661875	Tt 24	1	1
0.662001	Tt 24	1	1
0.756421	Tt 24	1	1
0.473075	Tt 24	1	1
0.726281	Tt 24	1	1
0.723052	Tt 24	1	1
0.780854	Tt 24	1	1
0.771664	Tt 24	1	1
0.59607	Tt 24	1	1
0.577919	Tt 24	1	1
-0.501799	Tt 24	1	1
-0.581356	Tt 24	1	1
0.980761	Tt 24	1	1
0.753175	Tt 24	1	1
0.744451	Tt 24	1	1
0.795921	Tt 24	1	1
0.745917	Tt 24	1	1
0.781286	Tt 24	1	1
0.798758	Tt 24	1	1
0.525517	Tt 24	1	1
0.617328	Tt 24	1	1
0.328236	Tt 24	1	1
0.772302	Tt 24	1	1
0.709951	Tt 24	1	1
0.781128	Tt 24	2	1
0.798816	Tt 24	2	1
1.03124	Tt 24	2	1
0.669619	Tt 24	2	1
0.724905	Tt 24	2	1
0.86177	Tt 24	2	1
0.67148	Tt 24	2	1
0.7418	Tt 24	2	1
1.65811	Tt 24	2	1
-0.837717	Tt 24	2	1
0.837202	Tt 24	2	1
0.67285	Tt 24	2	1
0.790963	Tt 24	2	1
0.95503	Tt 24	2	1
0.802137	Tt 24	2	1
0.743522	Tt 24	2	1
0.655722	Tt 24	2	1
0.465688	Tt 24	2	1
0.778253	Tt 24	3	1
0.712573	Tt 24	3	1
0.680651	Tt 24	3	1
0.773381	Tt 24	3	1
0.789828	Tt 24	3	1
0.745877	Tt 24	3	1
0.769953	Tt 24	3	1
0.747958	Tt 24	3	1
0.731304	Tt 24	3	1
0.731603	Tt 24	3	1
0.825345	Tt 24	3	1
0.765262	Tt 24	3	1
0.570196	Tt 24	3	1
0.892628	Tt 24	3	1
0.396502	Tt 24	3	1
0.605146	Tt 24	3	1
0.597159	Tt 24	3	1
0.721562	Tt 24	3	1
0.437745	Tt 24	3	1
0.667066	Tt 24	3	1
0.546762	Tt 24	3	1
0.624715	Tt 24	3	1
0.739796	Tt 24	3	1
0.864493	Tt 24	3	1
0.663461	Tt 24	3	1
0.720127	Tt 24	3	1
0.852179	Tt 24	3	1
0.811708	Tt 24	3	1
0.814786	Tt 24	3	1
0.947562	Tt 24	3	1
0.874408	Tt 24	3	1
0.741124	Tt 24	3	1
0.927587	Tt 24	3	1
0.720832	Tt 24	4	1
0.67793	Tt 24	4	1
0.681622	Tt 24	4	1
0.696035	Tt 24	4	1
0.707394	Tt 24	4	1
0.643963	Tt 24	4	1
0.747243	Tt 24	4	1
0.563948	Tt 24	4	1
0.8047	Tt 24	4	1
0.715189	Tt 24	4	1
0.720685	Tt 24	4	1
-0.424819	Tt 24	4	1
0.739593	Tt 24	4	1
0.701635	Tt 24	4	1
0.455813	Tt 24	4	1
0.282354	Tt 24	4	1
0.412055	Tt 24	4	1
0.590482	Tt 24	4	1
-0.745506	Tt 24	4	1
0.701795	Tt 24	4	1
0.666785	Tt 24	4	1
0.748588	Tt 24	4	1
0.486635	Tt 24	4	1
0.719037	Tt 24	4	1
0.688204	Tt 24	4	1
0.760028	Tt 24	4	1
0.71042	Tt 24	4	1
0.656409	Tt 24	4	1
0.697849	Tt 24	4	1
0.675738	Tt 24	4	1
0.70126	Tt 24	4	1
0.685406	Tt 24	4	1
0.69812	Tt 24	4	1
0.717841	Tt 24	5	1
1.00839	Tt 24	5	1
0.632522	Tt 24	5	1
0.763578	Tt 24	5	1
0.72457	Tt 24	5	1
0.921824	Tt 24	5	1
0.500876	Tt 24	5	1
0.70578	Tt 24	5	1
0.750647	Tt 24	5	1
0.836012	Tt 24	5	1
0.800333	Tt 24	5	1
1.11377	Tt 24	5	1
0.826965	Tt 24	5	1
1.02947	Tt 24	5	1
0.261986	Tt 24	5	1
-1.06301	Tt 24	5	1
1.02473	Tt 24	5	1
0.622387	Tt 24	5	1
0.715316	Tt 24	5	1
0.712433	Tt 24	5	1
0.708471	Tt 24	5	1
0.744732	Tt 24	5	1
0.834029	Tt 24	5	1
0.303113	Tt 24	5	1
0.581489	Tt 24	5	1
0.999684	Tt 24	5	1
0.679072	Tt 24	5	1
0.848313	Tt 24	5	1
0.817207	Tt 24	5	1
0.662989	Tt 24	5	1
0.831282	Tt 24	5	1
0.687306	Tt 24	5	1
-0.882742	Tt 24	5	1
0.687533	Tt 24	5	1
0.780574	Tt 24	5	1
-0.754035	Tt 24	5	1
0.929929	Tt 24	5	1
0.888995	Tt 24	5	1
-0.105032	Tt 24	5	1
0.737772	Tt 24	5	1
0.71739	Tt 24	5	1
0.693812	Tt 24	5	1
-0.439368	Tt 24	5	1
0.793005	Tt 24	5	1
0.717502	Burn 24	1	1
1.17647	Burn 24	1	1
0.668985	Burn 24	1	1
0.539249	Burn 24	1	1
0.809406	Burn 24	1	1
0.70268	Burn 24	1	1
0.502496	Burn 24	1	1
0.53034	Burn 24	1	1
0.702128	Burn 24	1	1
0.606358	Burn 24	1	1
0.51582	Burn 24	1	1
0.577073	Burn 24	1	1
0.566242	Burn 24	1	1
0.69655	Burn 24	1	1
0.570941	Burn 24	1	1
0.59901	Burn 24	1	1
0.794965	Burn 24	1	1
0.675043	Burn 24	1	1
0.24242	Burn 24	1	1
0.708911	Burn 24	1	1
0.439634	Burn 24	1	1
0.738661	Burn 24	1	1
0.694396	Burn 24	1	1
0.579321	Burn 24	1	1
0.436215	Burn 24	1	1
0.506145	Burn 24	1	1
0.817147	Burn 24	1	1
0.675644	Burn 24	1	1
0.617482	Burn 24	1	1
0.612387	Burn 24	1	1
0.416027	Burn 24	1	1
-0.0602837	Burn 24	1	1
0.514	Burn 24	1	1
0.414021	Burn 24	1	1
0.567555	Burn 24	1	1
0.608223	Burn 24	1	1
0.824282	Burn 24	1	1
0.62095	Burn 24	1	1
0.712414	Burn 24	1	1
0.537451	Burn 24	1	1
0.568432	Burn 24	1	1
0.55592	Burn 24	1	1
0.748209	Burn 24	1	1
0.519729	Burn 24	1	1
0.629382	Burn 24	1	1
0.395745	Burn 24	1	1
0.596425	Burn 24	1	1
0.59441	Burn 24	1	1
0.10252	Burn 24	1	1
0.864362	Burn 24	1	1
0.652378	Burn 24	1	1
-1.11581	Burn 24	1	1
0.808304	Burn 24	1	1
0.784933	Burn 24	1	1
0.891704	Burn 24	1	1
0.690714	Burn 24	1	1
0.594466	Burn 24	1	1
0.733268	Burn 24	1	1
0.863435	Burn 24	1	1
0.709768	Burn 24	1	1
0.636533	Burn 24	1	1
0.74337	Burn 24	1	1
0.517912	Burn 24	1	1
0.650305	Burn 24	1	1
0.565327	Burn 24	1	1
0.53199	Burn 24	1	1
0.645491	Burn 24	1	1
0.467989	Burn 24	1	1
0.505771	Burn 24	1	1
0.675002	Burn 24	1	1
0.642196	Burn 24	1	1
0.611693	Burn 24	1	1
0.56551	Burn 24	1	1
0.650701	Burn 24	1	1
0.859926	Burn 24	1	1
0.712087	Burn 24	1	1
0.572416	Burn 24	1	1
1.01543	Burn 24	1	1
1.05428	Burn 24	1	1
0.549657	Burn 24	1	1
0.629979	Burn 24	1	1
0.395592	Burn 24	1	1
0.548074	Burn 24	1	1
0.539698	Burn 24	1	1
0.653731	Burn 24	1	1
0.531373	Burn 24	1	1
0.634902	Burn 24	1	1
0.61161	Burn 24	1	1
1.21213	Burn 24	1	1
1.24483	Burn 24	1	1
0.759678	Burn 24	1	1
0.610129	Burn 24	1	1
0.675205	Burn 24	1	1
0.523456	Burn 24	1	1
0.74602	Burn 24	1	1
0.934069	Burn 24	1	1
1.02912	Burn 24	1	1
0.667753	Burn 24	1	1
0.829871	Burn 24	1	1
0.870011	Burn 24	1	1
0.640587	Burn 24	1	1
0.731042	Burn 24	1	1
0.475464	Burn 24	1	1
0.506137	Burn 24	1	1
0.651868	Burn 24	1	1
0.58997	Burn 24	1	1
0.648953	Burn 24	1	1
0.734377	Burn 24	1	1
0.452824	Burn 24	1	1
0.535264	Burn 24	1	1
0.780744	Burn 24	1	1
0.824671	Burn 24	1	1
0.803697	Burn 24	1	1
0.498536	Burn 24	2	1
0.679153	Burn 24	2	1
0.888123	Burn 24	2	1
0.515592	Burn 24	2	1
0.705172	Burn 24	2	1
0.674852	Burn 24	2	1
0.859858	Burn 24	2	1
0.607499	Burn 24	2	1
0.825054	Burn 24	2	1
0.615961	Burn 24	2	1
0.494813	Burn 24	2	1
0.503575	Burn 24	2	1
0.631213	Burn 24	2	1
0.444047	Burn 24	2	1
0.450303	Burn 24	2	1
-1.00973	Burn 24	2	1
0.470167	Burn 24	2	1
-1.01097	Burn 24	2	1
-0.629818	Burn 24	2	1
0.729617	Burn 24	2	1
0.556529	Burn 24	2	1
0.394964	Burn 24	2	1
0.490654	Burn 24	2	1
0.433556	Burn 24	2	1
0.741131	Burn 24	2	1
0.422056	Burn 24	2	1
0.712624	Burn 24	2	1
0.638847	Burn 24	2	1
0.848589	Burn 24	2	1
0.831	Burn 24	2	1
0.527871	Burn 24	2	1
0.290339	Burn 24	2	1
0.59084	Burn 24	2	1
0.44592	Burn 24	2	1
0.507449	Burn 24	2	1
0.532974	Burn 24	2	1
0.710029	Burn 24	2	1
0.696675	Burn 24	2	1
0.791171	Burn 24	2	1
0.635782	Burn 24	2	1
0.653033	Burn 24	2	1
0.760715	Burn 24	2	1
0.664803	Burn 24	2	1
0.9058	Burn 24	2	1
0.777158	Burn 24	2	1
0.523246	Burn 24	2	1
0.570054	Burn 24	2	1
0.6005	Burn 24	2	1
0.613962	Burn 24	2	1
0.72389	Burn 24	2	1
0.803523	Burn 24	2	1
0.554655	Burn 24	2	1
0.691279	Burn 24	2	1
0.575704	Burn 24	2	1
0.945095	Burn 24	2	1
0.70723	Burn 24	2	1
0.591877	Burn 24	2	1
0.294048	Burn 24	2	1
0.626029	Burn 24	2	1
0.43934	Burn 24	2	1
0.54915	Burn 24	2	1
0.476866	Burn 24	2	1
0.594187	Burn 24	2	1
0.665974	Burn 24	2	1
0.327294	Burn 24	2	1
0.607623	Burn 24	2	1
0.482937	Burn 24	2	1
0.65218	Burn 24	2	1
0.710157	Burn 24	2	1
0.529417	Burn 24	2	1
0.635009	Burn 24	2	1
0.607654	Burn 24	2	1
0.630789	Burn 24	2	1
0.765562	Burn 24	2	1
0.618062	Burn 24	2	1
0.75451	Burn 24	2	1
0.595571	Burn 24	2	1
0.55261	Burn 24	2	1
0.49562	Burn 24	2	1
0.730323	Burn 24	2	1
0.42828	Burn 24	2	1
0.971607	Burn 24	2	1
0.745507	Burn 24	2	1
0.579345	Burn 24	2	1
0.679449	Burn 24	2	1
0.692539	Burn 24	2	1
0.632476	Burn 24	2	1
0.626474	Burn 24	2	1
0.857177	Burn 24	2	1
0.747689	Burn 24	2	1
0.942832	Burn 24	2	1
0.743231	Burn 24	2	1
0.580685	Burn 24	2	1
0.688649	Burn 24	2	1
0.724629	Burn 24	2	1
0.459448	Burn 24	2	1
0.898973	Burn 24	2	1
0.642051	Burn 24	2	1
0.66304	Burn 24	2	1
0.497352	Burn 24	2	1
0.677167	Burn 24	2	1
0.717176	Burn 24	2	1
0.785832	Burn 24	2	1
0.650108	Burn 24	2	1
0.815351	Burn 24	2	1
0.66184	Burn 24	2	1
0.862498	Burn 24	2	1
0.623074	Burn 24	2	1
0.718601	Burn 24	2	1
0.598572	Burn 24	2	1
0.761855	Burn 24	2	1
0.663441	Burn 24	2	1
0.589721	Burn 24	2	1
0.645354	Burn 24	2	1
0.490664	Burn 24	2	1
0.472143	Burn 24	2	1
0.691636	Burn 24	3	1
0.590911	Burn 24	3	1
0.67934	Burn 24	3	1
0.703179	Burn 24	3	1
0.718319	Burn 24	3	1
0.631019	Burn 24	3	1
0.698117	Burn 24	3	1
0.640421	Burn 24	3	1
0.682115	Burn 24	3	1
0.662138	Burn 24	3	1
0.523758	Burn 24	3	1
0.579709	Burn 24	3	1
0.489918	Burn 24	3	1
0.574385	Burn 24	3	1
0.34348	Burn 24	3	1
0.797276	Burn 24	3	1
0.765338	Burn 24	3	1
0.720397	Burn 24	3	1
0.309256	Burn 24	3	1
0.518158	Burn 24	3	1
0.697158	Burn 24	3	1
0.618842	Burn 24	3	1
0.722503	Burn 24	3	1
0.780915	Burn 24	3	1
0.68186	Burn 24	3	1
0.493513	Burn 24	3	1
0.616361	Burn 24	3	1
0.443879	Burn 24	3	1
0.57221	Burn 24	3	1
0.628279	Burn 24	3	1
0.62236	Burn 24	3	1
0.592273	Burn 24	3	1
0.647419	Burn 24	3	1
0.724328	Burn 24	3	1
0.627203	Burn 24	3	1
0.617754	Burn 24	3	1
0.0784308	Burn 24	3	1
0.760682	Burn 24	3	1
0.531425	Burn 24	3	1
0.671931	Burn 24	3	1
0.768302	Burn 24	3	1
0.593646	Burn 24	3	1
0.608606	Burn 24	3	1
0.776008	Burn 24	3	1
0.697703	Burn 24	3	1
0.687281	Burn 24	3	1
0.630189	Burn 24	3	1
0.398163	Burn 24	3	1
0.660187	Burn 24	3	1
0.592622	Burn 24	3	1
0.789961	Burn 24	3	1
0.277977	Burn 24	3	1
0.564986	Burn 24	3	1
0.469898	Burn 24	3	1
0.550374	Burn 24	3	1
0.308352	Burn 24	3	1
0.426506	Burn 24	3	1
0.379996	Burn 24	3	1
0.576011	Burn 24	3	1
0.719876	Burn 24	3	1
0.0239221	Burn 24	3	1
0.370148	Burn 24	3	1
0.72529	Burn 24	3	1
0.677432	Burn 24	3	1
-0.83308	Burn 24	3	1
0.671426	Burn 24	3	1
0.586052	Burn 24	3	1
0.579963	Burn 24	3	1
0.851465	Burn 24	3	1
0.687182	Burn 24	3	1
0.456958	Burn 24	3	1
0.660397	Burn 24	3	1
0.671627	Burn 24	3	1
0.603735	Burn 24	3	1
0.711862	Burn 24	3	1
0.693847	Burn 24	3	1
0.697589	Burn 24	3	1
0.638629	Burn 24	3	1
0.583612	Burn 24	3	1
0.570492	Burn 24	3	1
0.129267	Burn 24	3	1
0.673529	Burn 24	3	1
0.551641	Burn 24	3	1
-1.05688	Burn 24	3	1
0.773749	Burn 24	3	1
0.707357	Burn 24	3	1
0.713914	Burn 24	3	1
0.673092	Burn 24	3	1
0.728745	Burn 24	3	1
-0.995628	Burn 24	3	1
0.647152	Burn 24	3	1
0.635504	Burn 24	3	1
0.661306	Burn 24	3	1
0.500629	Burn 24	3	1
0.811932	Burn 24	3	1
0.656436	Burn 24	3	1
0.37195	Burn 24	3	1
0.859139	Burn 24	3	1
1.17814	Burn 24	3	1
1.19616	Burn 24	3	1
-0.698739	Burn 24	3	1
1.22181	Burn 24	3	1
1.23594	Burn 24	3	1
0.77119	Burn 24	3	1
1.26645	Burn 24	3	1
0.759848	Burn 24	3	1
0.625559	Burn 24	4	1
0.720031	Burn 24	4	1
0.644921	Burn 24	4	1
0.521236	Burn 24	4	1
0.627628	Burn 24	4	1
0.662357	Burn 24	4	1
0.61267	Burn 24	4	1
0.628047	Burn 24	4	1
0.56497	Burn 24	4	1
0.501443	Burn 24	4	1
0.605528	Burn 24	4	1
0.582465	Burn 24	4	1
0.548523	Burn 24	4	1
0.613633	Burn 24	4	1
0.659606	Burn 24	4	1
0.538234	Burn 24	4	1
0.827967	Burn 24	4	1
0.689952	Burn 24	4	1
0.557327	Burn 24	4	1
0.707831	Burn 24	4	1
0.64331	Burn 24	4	1
0.563933	Burn 24	4	1
0.520301	Burn 24	4	1
0.478873	Burn 24	4	1
0.521964	Burn 24	4	1
0.494113	Burn 24	4	1
0.556409	Burn 24	4	1
0.513082	Burn 24	4	1
0.552827	Burn 24	4	1
0.589846	Burn 24	4	1
0.617443	Burn 24	4	1
0.527928	Burn 24	4	1
0.502937	Burn 24	4	1
0.417504	Burn 24	4	1
0.469308	Burn 24	4	1
0.552189	Burn 24	4	1
0.548511	Burn 24	4	1
0.563864	Burn 24	4	1
0.478796	Burn 24	4	1
0.612814	Burn 24	4	1
0.606797	Burn 24	4	1
0.461912	Burn 24	4	1
0.490661	Burn 24	4	1
0.629349	Burn 24	4	1
0.606558	Burn 24	4	1
0.516521	Burn 24	4	1
0.506352	Burn 24	4	1
0.661879	Burn 24	4	1
0.481201	Burn 24	4	1
0.785751	Burn 24	4	1
0.598961	Burn 24	4	1
0.484335	Burn 24	4	1
0.373518	Burn 24	4	1
0.610102	Burn 24	4	1
0.478854	Burn 24	4	1
0.437407	Burn 24	4	1
0.471593	Burn 24	4	1
0.536876	Burn 24	4	1
0.875683	Burn 24	4	1
0.564754	Burn 24	4	1
0.756225	Burn 24	4	1
0.561995	Burn 24	4	1
0.757643	Burn 24	4	1
0.656207	Burn 24	4	1
0.718639	Burn 24	4	1
0.684561	Burn 24	4	1
0.609664	Burn 24	4	1
0.487504	Burn 24	4	1
0.780254	Burn 24	4	1
0.745742	Burn 24	4	1
0.674787	Burn 24	4	1
0.5572	Burn 24	4	1
0.71061	Burn 24	4	1
0.78468	Burn 24	4	1
0.657134	Burn 24	4	1
0.663877	Burn 24	4	1
0.612702	Burn 24	4	1
0.767075	Burn 24	4	1
0.68898	Burn 24	4	1
0.691661	Burn 24	4	1
0.79563	Burn 24	4	1
0.79373	Burn 24	4	1
0.748956	Burn 24	4	1
0.69646	Burn 24	4	1
0.735036	Burn 24	4	1
0.892953	Burn 24	4	1
1.27014	Burn 24	4	1
0.659922	Burn 24	4	1
0.595194	Burn 24	4	1
0.466437	Burn 24	4	1
0.649889	Burn 24	4	1
0.709047	Burn 24	4	1
0.235388	Burn 24	4	1
0.788791	Burn 24	4	1
0.833367	Burn 24	4	1
0.992006	Burn 24	4	1
0.46703	Burn 24	4	1
0.566423	Burn 24	4	1
0.653026	Burn 24	4	1
0.943241	Burn 24	4	1
0.673991	Burn 24	4	1
0.742571	Burn 24	4	1
0.721363	Burn 24	4	1
0.856063	Burn 24	4	1
0.667654	Burn 24	4	1
0.496121	Burn 24	4	1
0.0640721	Burn 24	4	1
0.482747	Burn 24	4	1
0.627993	Burn 24	4	1
0.71967	Burn 24	4	1
0.651656	Burn 24	4	1
0.605921	Burn 24	4	1
0.594495	Burn 24	4	1
0.47722	Burn 24	4	1
0.463259	Burn 24	4	1
0.465437	Burn 24	4	1
0.529648	Burn 24	4	1
0.526712	Burn 24	4	1
0.487767	Burn 24	4	1
0.554715	Burn 24	4	1
0.84468	Burn 24	4	1
0.899379	Burn 24	4	1
0.61555	Burn 24	4	1
0.644584	Burn 24	4	1
0.579021	Burn 24	4	1
0.496252	Burn 24	4	1
0.559365	Burn 24	4	1
0.646206	Burn 24	4	1
1.38937	Burn 24	4	1
1.18062	Tt 24	1	2
1.09959	Tt 24	1	2
2.03423	Tt 24	1	2
0.835801	Tt 24	1	2
1.19884	Tt 24	1	2
0.845312	Tt 24	1	2
1.57112	Tt 24	1	2
1.37248	Tt 24	1	2
1.04984	Tt 24	1	2
0.912502	Tt 24	2	2
0.913256	Tt 24	2	2
0.648582	Tt 24	2	2
1.46908	Tt 24	2	2
1.8945	Tt 24	2	2
1.58512	Tt 24	2	2
1.46219	Tt 24	2	2
0.882753	Tt 24	2	2
1.23058	Tt 24	2	2
0.623705	Tt 24	2	2
1.27787	Tt 24	2	2
1.29076	Tt 24	2	2
1.01622	Tt 24	2	2
0.747624	Tt 24	2	2
0.596791	Tt 24	2	2
0.622451	Tt 24	2	2
0.622267	Tt 24	2	2
0.864619	Tt 24	2	2
0.711366	Tt 24	2	2
0.841631	Tt 24	2	2
1.35635	Tt 24	2	2
0.386498	Tt 24	2	2
1.08286	Tt 24	2	2
1.10227	Tt 24	2	2
1.2729	Tt 24	2	2
1.04906	Tt 24	2	2
1.0369	Tt 24	2	2
1.86885	Tt 24	3	2
1.94373	Tt 24	3	2
1.03571	Tt 24	3	2
1.05476	Tt 24	3	2
1.16359	Tt 24	3	2
1.39554	Tt 24	3	2
0.815323	Tt 24	3	2
0.763215	Tt 24	3	2
1.39498	Tt 24	3	2
1.40345	Tt 24	3	2
1.43362	Tt 24	3	2
1.44053	Tt 24	3	2
1.02154	Tt 24	3	2
1.21422	Tt 24	3	2
1.11651	Tt 24	3	2
1.32254	Tt 24	3	2
1.17361	Tt 24	3	2
1.57895	Tt 24	3	2
1.05032	Tt 24	3	2
1.38402	Tt 24	3	2
1.48968	Tt 24	4	2
1.4313	Tt 24	4	2
1.62438	Tt 24	4	2
1.64187	Tt 24	4	2
1.12499	Tt 24	4	2
1.02885	Tt 24	4	2
1.29346	Tt 24	4	2
1.0884	Tt 24	4	2
1.24475	Tt 24	4	2
0.9166	Tt 24	4	2
1.13641	Tt 24	4	2
1.09051	Tt 24	4	2
1.35009	Tt 24	4	2
1.01646	Tt 24	4	2
1.34053	Tt 24	4	2
1.0816	Tt 24	4	2
0.886005	Tt 24	4	2
0.83456	Tt 24	4	2
0.810257	Tt 24	4	2
1.01089	Tt 24	4	2
0.929313	Tt 24	4	2
0.838583	Tt 24	4	2
0.694458	Tt 24	4	2
0.805705	Tt 24	4	2
0.797271	Tt 24	4	2
0.811269	Tt 24	4	2
1.11674	Tt 24	4	2
1.40261	Tt 24	4	2
1.38963	Tt 24	4	2
1.45277	Tt 24	4	2
1.59012	Tt 24	5	2
0.966666	Tt 24	5	2
0.871764	Tt 24	5	2
0.896679	Tt 24	5	2
0.954353	Tt 24	5	2
0.993164	Tt 24	5	2
0.889099	Tt 24	5	2
0.949625	Tt 24	5	2
1.15262	Tt 24	5	2
1.22288	Tt 24	5	2
1.05231	Tt 24	5	2
2.24335	Tt 24	5	2
2.16188	Tt 24	5	2
1.29865	Tt 24	5	2
0.740826	Tt 24	5	2
0.752899	Tt 24	5	2
0.880319	Burn 24	1	2
0.695528	Burn 24	1	2
0.486213	Burn 24	1	2
0.917737	Burn 24	1	2
1.01342	Burn 24	1	2
2.16542	Burn 24	1	2
0.331933	Burn 24	1	2
0.843255	Burn 24	1	2
0.903715	Burn 24	1	2
0.888496	Burn 24	1	2
1.19998	Burn 24	1	2
0.716022	Burn 24	1	2
0.74587	Burn 24	1	2
0.649105	Burn 24	1	2
-0.506773	Burn 24	1	2
0.895181	Burn 24	1	2
0.976576	Burn 24	1	2
0.937673	Burn 24	1	2
1.7849	Burn 24	2	2
1.51242	Burn 24	2	2
1.46636	Burn 24	2	2
1.4515	Burn 24	2	2
1.30814	Burn 24	2	2
1.2302	Burn 24	2	2
1.2266	Burn 24	2	2
1.46022	Burn 24	2	2
1.10009	Burn 24	2	2
1.40865	Burn 24	2	2
0.861747	Burn 24	2	2
1.03595	Burn 24	2	2
0.9542	Burn 24	2	2
0.85146	Burn 24	2	2
0.880632	Burn 24	2	2
1.09982	Burn 24	2	2
1.51235	Burn 24	2	2
0.864174	Burn 24	2	2
0.680037	Burn 24	2	2
0.518769	Burn 24	2	2
0.722003	Burn 24	2	2
0.669899	Burn 24	2	2
0.653973	Burn 24	2	2
0.378	Burn 24	2	2
0.221224	Burn 24	2	2
0.460078	Burn 24	2	2
0.682148	Burn 24	2	2
0.17476	Burn 24	2	2
0.723065	Burn 24	2	2
0.636793	Burn 24	2	2
1.117	Burn 24	2	2
1.09657	Burn 24	2	2
1.05927	Burn 24	2	2
1.07617	Burn 24	2	2
0.995969	Burn 24	2	2
1.23515	Burn 24	2	2
1.41309	Burn 24	2	2
1.23127	Burn 24	2	2
1.26617	Burn 24	2	2
1.02732	Burn 24	2	2
0.568563	Burn 24	2	2
0.994147	Burn 24	2	2
0.872481	Burn 24	2	2
0.149072	Burn 24	2	2
0.651192	Burn 24	2	2
0.989788	Burn 24	2	2
0.844228	Burn 24	2	2
1.3392	Burn 24	2	2
0.910654	Burn 24	2	2
0.752642	Burn 24	2	2
0.73609	Burn 24	2	2
0.706109	Burn 24	2	2
0.695329	Burn 24	2	2
0.384716	Burn 24	2	2
0.91426	Burn 24	2	2
0.578695	Burn 24	2	2
0.68183	Burn 24	2	2
0.847346	Burn 24	2	2
0.851903	Burn 24	2	2
0.762121	Burn 24	2	2
0.751825	Burn 24	2	2
0.910323	Burn 24	2	2
0.672554	Burn 24	2	2
0.731128	Burn 24	2	2
0.723478	Burn 24	2	2
0.813311	Burn 24	3	2
0.798495	Burn 24	3	2
0.780981	Burn 24	3	2
0.934377	Burn 24	3	2
0.86072	Burn 24	3	2
0.89708	Burn 24	3	2
0.892337	Burn 24	3	2
0.777119	Burn 24	3	2
0.819486	Burn 24	3	2
0.857366	Burn 24	3	2
1.07081	Burn 24	3	2
0.930517	Burn 24	3	2
0.783178	Burn 24	3	2
0.861353	Burn 24	3	2
0.96998	Burn 24	3	2
0.883843	Burn 24	3	2
0.997226	Burn 24	3	2
1.11581	Burn 24	3	2
0.944996	Burn 24	3	2
0.663348	Burn 24	3	2
0.605261	Burn 24	3	2
0.565998	Burn 24	3	2
0.838312	Burn 24	3	2
0.464625	Burn 24	3	2
1.09566	Burn 24	3	2
0.847487	Burn 24	3	2
0.847518	Burn 24	3	2
0.820267	Burn 24	3	2
0.793481	Burn 24	3	2
1.00078	Burn 24	3	2
0.742675	Burn 24	3	2
1.05951	Burn 24	4	2
1.03736	Burn 24	4	2
1.13888	Burn 24	4	2
1.39521	Burn 24	4	2
0.844593	Burn 24	4	2
0.77038	Burn 24	4	2
0.95633	Burn 24	4	2
1.06576	Burn 24	4	2
0.766524	Burn 24	4	2
0.929732	Burn 24	4	2
-0.0409918	Burn 24	4	2
1.12101	Burn 24	4	2
1.49804	Burn 24	4	2
1.64013	Burn 24	4	2
1.50745	Burn 24	4	2
0.789056	Burn 24	4	2
0.979986	Burn 24	4	2
0.775229	Burn 24	4	2
2.75328	Burn 24	4	2
1.41966	Burn 24	4	2
1.44098	Burn 24	4	2
1.66678	Burn 24	4	2
0.713745	Burn 24	4	2
0.845945	Burn 24	4	2
0.922695	Burn 24	4	2
1.42254	Burn 24	4	2
1.02929	Burn 24	4	2
1.00296	Burn 24	4	2
1.04724	Burn 24	4	2
0.976866	Burn 24	4	2
1.06506	Burn 24	4	2
0.901209	Burn 24	4	2
1.24124	Burn 24	4	2
1.12549	Burn 24	5	2
1.13678	Burn 24	5	2
0.741825	Burn 24	5	2
0.990406	Burn 24	5	2
1.33212	Burn 24	5	2
1.19315	Burn 24	5	2
0.904132	Burn 24	5	2
1.31075	Burn 24	5	2
1.47124	Burn 24	5	2
1.0445	Burn 24	5	2
0.962233	Burn 24	5	2
1.24306	Burn 24	5	2
0.902255	Burn 24	5	2
1.21619	Burn 24	5	2
0.93846	Burn 24	5	2
0.853928	Burn 24	5	2
0.932474	Burn 24	5	2
1.27995	Burn 24	5	2
1.16116	Burn 24	5	2
0.488816	Burn 24	5	2
0.753537	Burn 24	5	2
0.755213	Burn 24	5	2
0.710398	Burn 24	5	2
0.684989	Burn 24	5	2
0.515858	Burn 24	5	2
0.76507	Burn 24	5	2
1.043	Burn 24	5	2
1.06536	Burn 24	5	2
1.44897	Burn 24	5	2
1.12407	Burn 24	5	2
1.00221	Burn 24	5	2
0.740447	Burn 24	5	2
0.946138	Burn 24	5	2
0.988618	Burn 24	5	2
0.739307	Burn 24	5	2
0.913925	Burn 24	5	2
0.732677	Burn 24	5	2
0.721365	Burn 24	5	2
1.03124	Tt 24	1	3
1.17417	Tt 24	1	3
1.32069	Tt 24	1	3
1.20482	Tt 24	1	3
1.08422	Tt 24	1	3
1.30952	Tt 24	1	3
1.17265	Tt 24	1	3
1.13258	Tt 24	1	3
1.09082	Tt 24	1	3
1.1878	Tt 24	1	3
1.12177	Tt 24	2	3
1.20988	Tt 24	2	3
1.09316	Tt 24	2	3
1.10424	Tt 24	2	3
0.971661	Tt 24	2	3
0.945296	Tt 24	2	3
1.17739	Tt 24	2	3
1.06752	Tt 24	2	3
1.02029	Tt 24	2	3
1.27243	Tt 24	3	3
0.946263	Tt 24	3	3
1.10536	Tt 24	3	3
1.17855	Tt 24	3	3
0.499226	Tt 24	3	3
1.25142	Tt 24	3	3
1.19771	Tt 24	3	3
1.24477	Tt 24	3	3
1.30184	Tt 24	3	3
1.14812	Tt 24	4	3
1.19536	Tt 24	4	3
1.068	Tt 24	4	3
1.13428	Tt 24	4	3
1.07411	Tt 24	4	3
1.27976	Tt 24	4	3
1.18965	Tt 24	4	3
1.20424	Tt 24	4	3
0.929593	Tt 24	4	3
1.20356	Tt 24	4	3
1.1932	Tt 24	4	3
1.07067	Tt 24	5	3
1.11238	Tt 24	5	3
1.19959	Tt 24	5	3
1.22344	Tt 24	5	3
1.18196	Tt 24	5	3
1.13256	Tt 24	5	3
1.01433	Tt 24	5	3
1.1751	Tt 24	5	3
1.14786	Tt 24	5	3
1.02137	Tt 24	5	3
1.15183	Tt 24	5	3
0.935185	Tt 24	6	3
0.826312	Tt 24	6	3
1.08543	Tt 24	6	3
1.3548	Tt 24	6	3
1.07627	Tt 24	6	3
1.19244	Tt 24	6	3
1.11688	Tt 24	6	3
1.30383	Tt 24	6	3
1.19121	Tt 24	6	3
1.13781	Tt 24	6	3
1.27223	Burn 24	1	3
1.21184	Burn 24	1	3
0.560769	Burn 24	1	3
0.982988	Burn 24	1	3
0.823164	Burn 24	1	3
0.644815	Burn 24	1	3
0.576578	Burn 24	1	3
1.04393	Burn 24	1	3
0.548988	Burn 24	1	3
0.673859	Burn 24	1	3
0.717282	Burn 24	1	3
0.795526	Burn 24	1	3
0.640972	Burn 24	1	3
0.632895	Burn 24	1	3
0.774201	Burn 24	1	3
0.606274	Burn 24	1	3
0.772618	Burn 24	1	3
0.634736	Burn 24	1	3
0.66007	Burn 24	1	3
0.583731	Burn 24	1	3
0.916226	Burn 24	1	3
0.389014	Burn 24	1	3
0.771843	Burn 24	1	3
0.842507	Burn 24	1	3
0.497945	Burn 24	1	3
0.46904	Burn 24	1	3
1.04182	Burn 24	1	3
0.460814	Burn 24	1	3
0.618355	Burn 24	1	3
0.638868	Burn 24	1	3
0.853846	Burn 24	1	3
0.52779	Burn 24	1	3
0.594629	Burn 24	1	3
0.723325	Burn 24	1	3
0.59629	Burn 24	1	3
0.822691	Burn 24	1	3
0.73057	Burn 24	1	3
0.674152	Burn 24	1	3
0.670313	Burn 24	1	3
0.760212	Burn 24	1	3
0.813636	Burn 24	1	3
0.618321	Burn 24	1	3
0.70873	Burn 24	1	3
1.29188	Burn 24	1	3
1.02539	Burn 24	1	3
1.05668	Burn 24	1	3
1.24896	Burn 24	1	3
1.18492	Burn 24	1	3
1.16489	Burn 24	1	3
1.23869	Burn 24	1	3
0.609252	Burn 24	2	3
0.936331	Burn 24	2	3
0.739381	Burn 24	2	3
0.732248	Burn 24	2	3
1.41053	Burn 24	2	3
0.458364	Burn 24	2	3
1.03677	Burn 24	2	3
0.501577	Burn 24	2	3
0.753138	Burn 24	2	3
0.436974	Burn 24	2	3
0.623895	Burn 24	2	3
0.812611	Burn 24	2	3
0.507421	Burn 24	2	3
0.436903	Burn 24	2	3
0.532374	Burn 24	2	3
0.538742	Burn 24	2	3
0.458862	Burn 24	2	3
0.351602	Burn 24	2	3
0.574413	Burn 24	2	3
0.713622	Burn 24	2	3
0.395337	Burn 24	2	3
0.325742	Burn 24	2	3
0.959952	Burn 24	3	3
1.05878	Burn 24	3	3
1.21583	Burn 24	3	3
1.12143	Burn 24	3	3
1.11503	Burn 24	3	3
1.08421	Burn 24	3	3
1.3343	Burn 24	3	3
1.03347	Burn 24	3	3
1.1906	Burn 24	3	3
1.24111	Burn 24	3	3
1.21014	Burn 24	3	3
1.28839	Burn 24	3	3
1.12177	Burn 24	3	3
0.648319	Burn 24	3	3
0.705703	Burn 24	3	3
0.952453	Burn 24	3	3
0.947166	Burn 24	3	3
0.773601	Burn 24	3	3
0.581455	Burn 24	3	3
0.673618	Burn 24	3	3
0.76292	Burn 24	3	3
0.687006	Burn 24	3	3
0.849695	Burn 24	3	3
1.30438	Burn 24	3	3
0.485108	Burn 24	3	3
0.790985	Burn 24	3	3
0.81711	Burn 24	3	3
0.799047	Burn 24	3	3
0.572589	Burn 24	3	3
0.642225	Burn 24	3	3
0.851143	Burn 24	3	3
0.840793	Burn 24	3	3
0.796945	Burn 24	3	3
0.690977	Burn 24	3	3
0.557551	Burn 24	3	3
0.34337	Burn 24	3	3
0.362677	Burn 24	3	3
0.109967	Burn 24	3	3
0.855018	Burn 24	3	3
1.07519	Burn 24	3	3
1.05211	Burn 24	3	3
0.00622867	Burn 24	3	3
0.699843	Burn 24	3	3
0.759562	Burn 24	3	3
1.23012	Burn 24	3	3
0.539659	Burn 24	3	3
1.09027	Burn 24	3	3
0.795939	Burn 24	4	3
0.975482	Burn 24	4	3
0.939704	Burn 24	4	3
0.782538	Burn 24	4	3
0.479549	Burn 24	4	3
0.882669	Burn 24	4	3
1.09792	Burn 24	4	3
1.04653	Burn 24	4	3
1.07796	Burn 24	4	3
0.897769	Burn 24	4	3
0.8031	Burn 24	4	3
0.905292	Burn 24	4	3
0.967245	Burn 24	4	3
1.17634	Burn 24	4	3
1.00033	Burn 24	4	3
0.805994	Burn 24	4	3
0.929463	Burn 24	4	3
1.0233	Burn 24	4	3
0.938854	Burn 24	4	3
1.13187	Burn 24	4	3
0.443833	Burn 24	4	3
1.03129	Burn 24	4	3
1.16117	Burn 24	4	3
0.909071	Burn 24	4	3
0.839717	Burn 24	4	3
0.693176	Burn 24	4	3
0.780908	Burn 24	4	3
1.43961	Burn 24	5	3
1.14501	Burn 24	5	3
0.998193	Burn 24	5	3
0.916481	Burn 24	5	3
0.834447	Burn 24	5	3
0.997481	Burn 24	5	3
0.965309	Burn 24	5	3
0.869089	Burn 24	5	3
0.518761	Burn 24	5	3
0.866025	Burn 24	5	3
0.621917	Burn 24	5	3
0.682587	Burn 24	5	3
0.906917	Burn 24	5	3
0.905097	Burn 24	5	3
0.651651	Burn 24	5	3
0.677397	Burn 24	5	3
0.765307	Burn 24	5	3
0.747023	Burn 24	5	3
0.9765	Burn 24	5	3
0.847507	Burn 24	5	3
0.839052	Burn 24	5	3
0.93393	Burn 24	5	3
0.879568	Burn 24	5	3
0.460589	Burn 24	5	3
0.581666	Burn 24	5	3
0.928782	Burn 24	5	3
0.70855	Burn 24	5	3
0.753643	Burn 24	5	3
0.687032	Burn 24	5	3
0.795712	Burn 24	5	3
0.643902	Burn 24	5	3
0.84331	Burn 24	5	3
0.90198	Burn 24	5	3
0.93213	Burn 24	5	3
0.924337	Burn 24	5	3
0.980711	Burn 24	5	3
0.753946	Burn 24	5	3
0.950288	Burn 24	5	3
0.817321	Burn 24	5	3
1.00035	Burn 24	5	3
0.802746	Burn 24	5	3
0.755039	Burn 24	5	3
0.846155	Burn 24	5	3
0.918556	Burn 24	5	3
1.17065	Burn 24	5	3
0.721222	Burn 24	5	3
1.16161	Burn 24	5	3
1.25259	Burn 24	5	3
1.04539	Burn 24	5	3
1.06924	Burn 24	5	3
0.810954	Burn 24	5	3
0.852789	Burn 24	5	3
1.01636	Burn 24	5	3
1.07098	Burn 24	5	3
0.921614	Burn 24	5	3
1.16006	Tt 72	1	1
1.09481	Tt 72	1	1
1.19169	Tt 72	1	1
1.27554	Tt 72	1	1
1.40281	Tt 72	1	1
1.04039	Tt 72	1	1
1.25498	Tt 72	1	1
1.53684	Tt 72	1	1
0.953598	Tt 72	1	1
1.35578	Tt 72	1	1
1.30973	Tt 72	1	1
1.63825	Tt 72	1	1
1.10268	Tt 72	1	1
1.16335	Tt 72	1	1
1.19275	Tt 72	1	1
1.11799	Tt 72	1	1
1.19268	Tt 72	1	1
1.01579	Tt 72	1	1
1.47522	Tt 72	1	1
1.31644	Tt 72	1	1
1.05205	Tt 72	1	1
1.2049	Tt 72	1	1
1.02524	Tt 72	2	1
1.12721	Tt 72	2	1
1.402	Tt 72	2	1
1.20123	Tt 72	2	1
1.11079	Tt 72	2	1
1.04195	Tt 72	2	1
1.07188	Tt 72	2	1
1.13848	Tt 72	2	1
1.30155	Tt 72	2	1
1.09481	Tt 72	2	1
0.941627	Tt 72	2	1
0.986726	Tt 72	2	1
1.09464	Tt 72	2	1
1.15688	Tt 72	2	1
1.05956	Tt 72	2	1
1.33741	Tt 72	2	1
0.977816	Tt 72	2	1
1.2371	Tt 72	2	1
1.15889	Tt 72	2	1
1.09959	Tt 72	2	1
1.19061	Tt 72	2	1
1.02731	Tt 72	2	1
1.23125	Tt 72	2	1
0.725118	Tt 72	2	1
0.998315	Tt 72	2	1
1.08468	Tt 72	2	1
1.09033	Tt 72	2	1
1.1314	Tt 72	2	1
0.392176	Tt 72	2	1
0.422001	Tt 72	2	1
0.462573	Tt 72	2	1
0.845677	Tt 72	2	1
0.925836	Tt 72	2	1
0.903888	Tt 72	2	1
1.03998	Tt 72	2	1
1.10237	Tt 72	2	1
0.906725	Tt 72	2	1
1.84964	Tt 72	2	1
1.33083	Tt 72	2	1
1.07686	Tt 72	2	1
1.37335	Tt 72	3	1
1.45889	Tt 72	3	1
1.25806	Tt 72	3	1
1.53922	Tt 72	3	1
1.09232	Tt 72	3	1
1.79943	Tt 72	3	1
0.988791	Tt 72	3	1
1.25575	Tt 72	3	1
1.33281	Tt 72	3	1
1.17994	Tt 72	3	1
1.44457	Tt 72	3	1
2.10366	Tt 72	3	1
1.11916	Tt 72	3	1
1.0361	Tt 72	3	1
1.49054	Tt 72	3	1
1.71495	Tt 72	3	1
1.21752	Tt 72	3	1
1.1036	Tt 72	3	1
0.981663	Tt 72	3	1
1.16757	Burn 72	1	1
1.03436	Burn 72	1	1
1.14733	Burn 72	1	1
1.47835	Burn 72	1	1
0.891578	Burn 72	1	1
1.6785	Burn 72	1	1
1.06134	Burn 72	1	1
1.15949	Burn 72	1	1
1.12584	Burn 72	1	1
1.15854	Burn 72	1	1
1.02215	Burn 72	1	1
1.27166	Burn 72	1	1
1.20473	Burn 72	1	1
1.19511	Burn 72	1	1
2.39767	Burn 72	1	1
1.20274	Burn 72	1	1
1.06298	Burn 72	1	1
1.52903	Burn 72	1	1
1.18468	Burn 72	1	1
1.29783	Burn 72	1	1
1.49977	Burn 72	1	1
1.54169	Burn 72	1	1
1.15616	Burn 72	1	1
1.23966	Burn 72	1	1
1.23596	Burn 72	1	1
1.27825	Burn 72	1	1
1.20817	Burn 72	1	1
1.05441	Burn 72	1	1
1.21082	Burn 72	1	1
1.7508	Burn 72	1	1
2.49707	Burn 72	1	1
1.00274	Burn 72	1	1
1.33524	Burn 72	1	1
1.61563	Burn 72	1	1
0.744339	Burn 72	1	1
1.26339	Burn 72	1	1
1.24909	Burn 72	1	1
1.18109	Burn 72	1	1
1.03393	Burn 72	1	1
0.961892	Burn 72	1	1
1.46483	Burn 72	1	1
0.926934	Burn 72	1	1
1.41833	Burn 72	1	1
1.22943	Burn 72	1	1
1.23651	Burn 72	1	1
1.30061	Burn 72	1	1
1.25102	Burn 72	1	1
1.02663	Burn 72	1	1
1.03775	Burn 72	1	1
1.11308	Burn 72	1	1
1.08461	Burn 72	1	1
1.07419	Burn 72	1	1
1.14075	Burn 72	1	1
1.45262	Burn 72	1	1
1.66761	Burn 72	1	1
1.39959	Burn 72	1	1
1.35478	Burn 72	1	1
1.26218	Burn 72	1	1
1.23103	Burn 72	1	1
1.20605	Burn 72	1	1
1.37211	Burn 72	1	1
1.80936	Burn 72	1	1
1.2884	Burn 72	1	1
1.13686	Burn 72	1	1
1.34801	Burn 72	1	1
1.60394	Burn 72	1	1
1.38166	Burn 72	1	1
1.66988	Burn 72	1	1
1.63093	Burn 72	1	1
1.29747	Burn 72	1	1
1.35301	Burn 72	1	1
1.08831	Burn 72	1	1
0.99474	Burn 72	1	1
1.09846	Burn 72	1	1
1.7896	Burn 72	1	1
1.46198	Burn 72	1	1
1.66472	Burn 72	1	1
1.3422	Burn 72	1	1
1.43942	Burn 72	1	1
1.27772	Burn 72	1	1
1.17482	Burn 72	1	1
1.23995	Burn 72	1	1
1.02488	Burn 72	1	1
1.68087	Burn 72	1	1
0.982163	Burn 72	1	1
1.19813	Burn 72	1	1
1.25699	Burn 72	1	1
1.05648	Burn 72	1	1
1.10937	Burn 72	1	1
1.45195	Burn 72	1	1
1.1004	Burn 72	1	1
1.13258	Burn 72	1	1
1.07605	Burn 72	1	1
1.12046	Burn 72	1	1
1.28058	Burn 72	1	1
1.17346	Burn 72	1	1
1.3639	Burn 72	1	1
1.19429	Burn 72	1	1
1.06553	Burn 72	1	1
1.39869	Burn 72	1	1
1.1881	Burn 72	1	1
1.83417	Burn 72	1	1
1.92157	Burn 72	1	1
1.34615	Burn 72	1	1
1.21766	Burn 72	1	1
1.01255	Burn 72	1	1
1.37746	Burn 72	1	1
1.17326	Burn 72	1	1
1.65985	Burn 72	1	1
1.55642	Burn 72	1	1
1.23357	Burn 72	1	1
1.03741	Burn 72	1	1
1.05029	Burn 72	1	1
1.49603	Burn 72	1	1
1.1647	Burn 72	1	1
1.02659	Burn 72	1	1
0.986875	Burn 72	1	1
1.20203	Burn 72	2	1
1.13714	Burn 72	2	1
1.09097	Burn 72	2	1
1.36351	Burn 72	2	1
1.10161	Burn 72	2	1
1.19528	Burn 72	2	1
1.25233	Burn 72	2	1
1.18546	Burn 72	2	1
0.712535	Burn 72	2	1
1.31114	Burn 72	2	1
1.0785	Burn 72	2	1
1.42655	Burn 72	2	1
1.30023	Burn 72	2	1
0.873374	Burn 72	2	1
0.311833	Burn 72	2	1
0.94999	Burn 72	2	1
0.797011	Burn 72	2	1
0.501036	Burn 72	2	1
0.672799	Burn 72	2	1
1.32464	Burn 72	2	1
1.33683	Burn 72	2	1
1.96508	Burn 72	2	1
1.96714	Burn 72	2	1
1.73133	Burn 72	2	1
1.49181	Burn 72	2	1
1.52663	Burn 72	2	1
1.52721	Burn 72	2	1
2.26227	Burn 72	2	1
2.50609	Burn 72	2	1
1.43875	Burn 72	2	1
2.57448	Burn 72	2	1
1.6619	Burn 72	2	1
1.86641	Burn 72	2	1
2.32517	Burn 72	2	1
2.09594	Burn 72	2	1
1.06333	Burn 72	2	1
1.26697	Burn 72	2	1
1.61287	Burn 72	2	1
1.58409	Burn 72	2	1
1.69364	Burn 72	2	1
1.3623	Burn 72	2	1
1.25803	Burn 72	2	1
1.84577	Burn 72	2	1
1.86929	Burn 72	2	1
1.79372	Burn 72	2	1
1.85288	Burn 72	2	1
1.98821	Burn 72	2	1
1.70068	Burn 72	2	1
0.972268	Burn 72	2	1
1.09541	Burn 72	2	1
1.86028	Burn 72	2	1
2.03046	Burn 72	2	1
1.68599	Burn 72	2	1
1.20533	Burn 72	2	1
1.38717	Burn 72	2	1
0.315286	Burn 72	2	1
0.766861	Burn 72	2	1
0.0932825	Burn 72	2	1
1.43398	Burn 72	2	1
0.960303	Burn 72	2	1
0.96912	Burn 72	2	1
1.29786	Burn 72	2	1
2.05434	Burn 72	2	1
2.29429	Burn 72	2	1
1.10824	Burn 72	2	1
1.13625	Burn 72	2	1
1.68234	Burn 72	2	1
2.18207	Burn 72	2	1
1.91166	Burn 72	2	1
1.47443	Burn 72	2	1
1.29146	Burn 72	2	1
-0.442393	Burn 72	2	1
0.787146	Burn 72	2	1
2.0821	Burn 72	2	1
1.22874	Burn 72	2	1
2.50151	Burn 72	2	1
1.92351	Burn 72	2	1
1.45698	Burn 72	2	1
1.97629	Burn 72	2	1
0.20954	Burn 72	2	1
-0.345547	Burn 72	2	1
0.306712	Burn 72	2	1
1.47187	Burn 72	2	1
0.947311	Burn 72	2	1
1.07272	Burn 72	2	1
1.44362	Burn 72	2	1
1.6189	Burn 72	2	1
0.998711	Burn 72	3	1
1.10729	Burn 72	3	1
1.25329	Burn 72	3	1
0.827669	Burn 72	3	1
1.21054	Burn 72	3	1
1.17837	Burn 72	3	1
1.29585	Burn 72	3	1
1.072	Burn 72	3	1
1.22013	Burn 72	3	1
1.43561	Burn 72	3	1
1.02314	Burn 72	3	1
1.57899	Burn 72	3	1
1.28255	Burn 72	3	1
1.0911	Burn 72	3	1
1.2547	Burn 72	3	1
0.571012	Burn 72	3	1
1.28397	Burn 72	3	1
1.19934	Burn 72	3	1
1.68825	Burn 72	3	1
1.13126	Burn 72	3	1
1.23399	Burn 72	3	1
1.37478	Burn 72	3	1
1.04944	Burn 72	3	1
1.18425	Burn 72	3	1
1.19061	Burn 72	3	1
1.24748	Burn 72	3	1
1.20348	Burn 72	3	1
0.997209	Burn 72	3	1
0.656138	Burn 72	3	1
0.824049	Burn 72	3	1
1.61105	Burn 72	3	1
1.12058	Burn 72	3	1
1.36583	Burn 72	3	1
1.00774	Burn 72	3	1
1.11613	Burn 72	3	1
1.38364	Burn 72	3	1
0.676179	Burn 72	3	1
1.07142	Burn 72	3	1
1.25546	Burn 72	3	1
1.41013	Burn 72	3	1
1.20871	Burn 72	3	1
1.14692	Burn 72	3	1
1.44462	Burn 72	3	1
1.56646	Burn 72	3	1
1.35823	Burn 72	3	1
1.13499	Burn 72	3	1
1.04986	Burn 72	3	1
1.2629	Burn 72	3	1
1.14972	Burn 72	3	1
1.47533	Burn 72	3	1
1.19583	Burn 72	3	1
1.35675	Burn 72	3	1
1.2371	Burn 72	3	1
1.33457	Burn 72	3	1
1.21539	Burn 72	3	1
1.21737	Burn 72	3	1
1.27896	Burn 72	3	1
1.28291	Burn 72	3	1
1.39295	Burn 72	3	1
1.15083	Burn 72	3	1
1.17211	Burn 72	3	1
1.44262	Burn 72	3	1
1.52265	Burn 72	3	1
0.643697	Burn 72	3	1
0.788645	Burn 72	3	1
1.4752	Burn 72	3	1
2.16132	Burn 72	3	1
1.61318	Burn 72	3	1
1.89372	Burn 72	3	1
1.30464	Burn 72	3	1
1.15864	Burn 72	3	1
1.22657	Burn 72	3	1
0.873845	Burn 72	3	1
1.18828	Burn 72	3	1
1.4687	Burn 72	3	1
1.30338	Burn 72	3	1
1.28817	Burn 72	3	1
1.49067	Burn 72	3	1
1.41043	Burn 72	3	1
1.43177	Burn 72	3	1
1.29497	Burn 72	3	1
1.43898	Burn 72	3	1
1.18256	Burn 72	3	1
1.11093	Burn 72	3	1
1.64274	Burn 72	3	1
2.58663	Burn 72	3	1
1.37474	Burn 72	3	1
2.45946	Burn 72	3	1
1.04668	Burn 72	3	1
1.59689	Burn 72	3	1
1.40329	Burn 72	3	1
1.72306	Burn 72	3	1
1.19559	Burn 72	3	1
0.923345	Burn 72	3	1
1.65154	Burn 72	3	1
0.901684	Burn 72	3	1
1.18319	Burn 72	3	1
0.968613	Burn 72	3	1
1.04477	Burn 72	3	1
1.3006	Burn 72	3	1
1.18733	Burn 72	3	1
1.54103	Burn 72	3	1
1.23921	Burn 72	3	1
1.51435	Burn 72	3	1
1.27148	Burn 72	3	1
1.51586	Burn 72	3	1
1.11134	Burn 72	3	1
1.12434	Burn 72	3	1
0.941132	Burn 72	3	1
1.27679	Burn 72	3	1
1.0823	Burn 72	3	1
1.12649	Burn 72	3	1
1.15575	Burn 72	3	1
1.32661	Burn 72	3	1
1.10633	Burn 72	3	1
1.08138	Burn 72	3	1
1.12	Burn 72	3	1
1.35196	Burn 72	3	1
1.33043	Burn 72	3	1
1.35991	Burn 72	3	1
1.59403	Burn 72	3	1
1.02522	Burn 72	3	1
1.27037	Burn 72	3	1
1.20221	Burn 72	3	1
1.5184	Burn 72	3	1
1.08108	Burn 72	3	1
1.20206	Burn 72	3	1
1.03002	Burn 72	3	1
2.44585	Tt 72	1	2
1.78287	Tt 72	1	2
2.02371	Tt 72	1	2
1.22765	Tt 72	1	2
1.7987	Tt 72	1	2
1.39981	Tt 72	1	2
1.50568	Tt 72	1	2
1.53737	Tt 72	1	2
1.85823	Tt 72	1	2
1.63572	Tt 72	1	2
1.68767	Tt 72	1	2
1.3178	Tt 72	1	2
1.4933	Tt 72	1	2
1.43623	Tt 72	1	2
1.82886	Tt 72	1	2
1.74865	Tt 72	1	2
0.89288	Tt 72	1	2
0.62475	Tt 72	1	2
1.36002	Tt 72	1	2
1.67144	Tt 72	1	2
1.92699	Tt 72	1	2
1.26818	Tt 72	1	2
1.30686	Tt 72	1	2
0.946243	Tt 72	1	2
0.929748	Tt 72	1	2
0.940476	Tt 72	1	2
0.750945	Tt 72	1	2
0.55101	Tt 72	1	2
1.54318	Tt 72	1	2
1.36304	Tt 72	1	2
0.760853	Tt 72	1	2
0.846481	Tt 72	1	2
1.11192	Tt 72	1	2
2.05265	Tt 72	2	2
1.35751	Tt 72	2	2
1.33166	Tt 72	2	2
1.34749	Tt 72	2	2
1.13579	Tt 72	2	2
1.09999	Tt 72	2	2
0.897281	Tt 72	2	2
1.09112	Tt 72	2	2
1.26901	Tt 72	2	2
1.67491	Tt 72	2	2
0.882365	Tt 72	2	2
2.44585	Tt 72	3	2
1.78287	Tt 72	3	2
2.02371	Tt 72	3	2
1.22765	Tt 72	3	2
1.7987	Tt 72	3	2
1.39981	Tt 72	3	2
1.50568	Tt 72	3	2
1.53737	Tt 72	3	2
1.85823	Tt 72	3	2
1.63572	Tt 72	3	2
1.68767	Tt 72	3	2
1.3178	Tt 72	3	2
1.4933	Tt 72	3	2
1.43623	Tt 72	3	2
1.82886	Tt 72	3	2
1.74865	Tt 72	3	2
0.89288	Tt 72	3	2
0.62475	Tt 72	3	2
1.36002	Tt 72	3	2
1.67144	Tt 72	3	2
1.60196	Burn 72	1	2
1.63653	Burn 72	1	2
1.78943	Burn 72	1	2
0.52324	Burn 72	1	2
0.531575	Burn 72	1	2
0.480446	Burn 72	1	2
0.694186	Burn 72	1	2
1.0614	Burn 72	1	2
1.32992	Burn 72	1	2
1.65326	Burn 72	1	2
1.24965	Burn 72	1	2
1.14011	Burn 72	1	2
0.797886	Burn 72	1	2
0.986062	Burn 72	1	2
0.723723	Burn 72	1	2
0.643688	Burn 72	1	2
0.929165	Burn 72	1	2
0.743369	Burn 72	1	2
2.24955	Burn 72	1	2
2.7428	Burn 72	1	2
0.558682	Burn 72	1	2
0.425014	Burn 72	1	2
0.628656	Burn 72	1	2
0.94513	Burn 72	1	2
0.618502	Burn 72	1	2
1.33258	Burn 72	1	2
1.5009	Burn 72	1	2
1.20573	Burn 72	1	2
1.19303	Burn 72	1	2
1.21943	Burn 72	1	2
0.714099	Burn 72	1	2
0.555063	Burn 72	1	2
1.13442	Burn 72	1	2
0.938973	Burn 72	1	2
0.986281	Burn 72	1	2
3.33755	Burn 72	1	2
1.93198	Burn 72	1	2
1.53388	Burn 72	1	2
0.983447	Burn 72	1	2
1.1438	Burn 72	1	2
1.37098	Burn 72	1	2
1.08881	Burn 72	1	2
0.974806	Burn 72	1	2
0.962122	Burn 72	1	2
1.32788	Burn 72	2	2
1.03963	Burn 72	2	2
0.775155	Burn 72	2	2
1.49743	Burn 72	2	2
1.71651	Burn 72	2	2
1.71501	Burn 72	2	2
1.22909	Burn 72	2	2
1.58452	Burn 72	2	2
1.398	Burn 72	2	2
1.07132	Burn 72	2	2
1.3186	Burn 72	2	2
1.75382	Burn 72	2	2
2.71375	Burn 72	2	2
2.48788	Burn 72	2	2
1.31184	Burn 72	2	2
0.793126	Burn 72	2	2
-0.0768035	Burn 72	2	2
1.1633	Burn 72	2	2
1.0128	Burn 72	2	2
0.451223	Burn 72	2	2
1.32824	Burn 72	3	2
0.506058	Burn 72	3	2
0.648669	Burn 72	3	2
0.579179	Burn 72	3	2
0.96049	Burn 72	3	2
1.01919	Burn 72	3	2
0.982752	Burn 72	3	2
1.68176	Burn 72	3	2
0.729797	Burn 72	3	2
0.906176	Burn 72	3	2
1.0298	Burn 72	3	2
1.60911	Burn 72	3	2
1.42721	Burn 72	3	2
1.16349	Burn 72	3	2
1.333	Burn 72	3	2
1.24957	Burn 72	3	2
1.30002	Burn 72	3	2
0.856441	Burn 72	3	2
0.785103	Burn 72	3	2
0.640107	Burn 72	4	2
0.831567	Burn 72	4	2
1.11252	Burn 72	4	2
1.42276	Burn 72	4	2
1.29436	Burn 72	4	2
2.23327	Burn 72	4	2
2.29377	Burn 72	4	2
0.766048	Burn 72	4	2
1.23705	Burn 72	4	2
1.43064	Burn 72	4	2
1.65041	Burn 72	4	2
1.57421	Burn 72	4	2
1.29105	Burn 72	4	2
0.740813	Burn 72	4	2
1.05999	Burn 72	4	2
0.656212	Burn 72	4	2
1.18115	Burn 72	4	2
1.01011	Burn 72	4	2
0.674356	Burn 72	4	2
2.40636	Burn 72	4	2
2.12191	Burn 72	4	2
0.988907	Burn 72	4	2
0.983002	Burn 72	4	2
0.916141	Burn 72	4	2
1.75521	Burn 72	4	2
0.619961	Burn 72	4	2
0.443893	Burn 72	4	2
1.64824	Tt 72	1	3
1.42732	Tt 72	1	3
1.67226	Tt 72	1	3
1.60722	Tt 72	1	3
1.48016	Tt 72	1	3
2.01259	Tt 72	1	3
1.55264	Tt 72	1	3
1.45998	Tt 72	1	3
1.48785	Tt 72	1	3
1.49155	Tt 72	1	3
1.66115	Tt 72	1	3
1.74404	Tt 72	1	3
1.65109	Tt 72	1	3
1.2457	Tt 72	1	3
1.65272	Tt 72	1	3
1.55988	Tt 72	1	3
1.58951	Tt 72	1	3
1.60946	Tt 72	1	3
1.57965	Tt 72	1	3
1.52317	Tt 72	1	3
1.41711	Tt 72	2	3
1.57247	Tt 72	2	3
1.53497	Tt 72	3	3
1.67785	Tt 72	3	3
1.55948	Tt 72	3	3
1.45896	Tt 72	3	3
1.37752	Tt 72	3	3
1.45357	Tt 72	3	3
1.56907	Tt 72	3	3
1.74076	Tt 72	3	3
1.66818	Tt 72	3	3
1.39147	Tt 72	3	3
1.68836	Tt 72	3	3
1.63978	Tt 72	3	3
1.4867	Tt 72	3	3
0.783265	Tt 72	3	3
0.862686	Tt 72	3	3
1.73528	Tt 72	4	3
1.70387	Tt 72	4	3
1.66085	Tt 72	4	3
1.72696	Tt 72	4	3
1.77186	Tt 72	4	3
1.53989	Tt 72	4	3
1.40522	Tt 72	4	3
1.50919	Tt 72	4	3
1.38458	Tt 72	4	3
1.58188	Tt 72	4	3
1.55402	Tt 72	4	3
1.78296	Tt 72	4	3
1.69232	Tt 72	4	3
1.45815	Tt 72	4	3
1.46519	Tt 72	4	3
1.5285	Tt 72	4	3
1.63432	Tt 72	4	3
1.61912	Tt 72	4	3
1.4695	Tt 72	5	3
1.6739	Tt 72	5	3
1.34798	Tt 72	5	3
1.59076	Tt 72	5	3
1.56938	Tt 72	5	3
1.40263	Tt 72	5	3
1.72508	Tt 72	6	3
1.48279	Tt 72	6	3
1.48311	Tt 72	6	3
1.55306	Tt 72	6	3
1.5022	Tt 72	6	3
1.62155	Tt 72	6	3
1.63035	Tt 72	6	3
1.27728	Burn 72	1	3
1.42775	Burn 72	1	3
1.53263	Burn 72	1	3
1.13497	Burn 72	1	3
1.45231	Burn 72	1	3
1.48912	Burn 72	1	3
1.28966	Burn 72	1	3
1.17562	Burn 72	1	3
1.21516	Burn 72	1	3
1.63949	Burn 72	1	3
1.6097	Burn 72	1	3
1.51483	Burn 72	1	3
2.10633	Burn 72	1	3
1.67132	Burn 72	1	3
0.789736	Burn 72	1	3
1.30841	Burn 72	1	3
1.23543	Burn 72	1	3
1.56517	Burn 72	1	3
1.54861	Burn 72	1	3
1.52146	Burn 72	1	3
1.78681	Burn 72	1	3
1.54936	Burn 72	1	3
1.49916	Burn 72	1	3
0.785059	Burn 72	1	3
0.80616	Burn 72	1	3
1.22301	Burn 72	1	3
2.03144	Burn 72	1	3
1.47943	Burn 72	1	3
1.67455	Burn 72	1	3
1.60631	Burn 72	1	3
1.57208	Burn 72	1	3
1.48834	Burn 72	1	3
1.45334	Burn 72	1	3
1.51373	Burn 72	1	3
1.33125	Burn 72	1	3
0.77892	Burn 72	2	3
1.49421	Burn 72	2	3
1.55107	Burn 72	2	3
1.51695	Burn 72	2	3
1.6397	Burn 72	2	3
1.4986	Burn 72	2	3
1.5348	Burn 72	2	3
1.55898	Burn 72	2	3
1.64781	Burn 72	2	3
0.999773	Burn 72	2	3
0.75348	Burn 72	2	3
1.73947	Burn 72	2	3
1.51277	Burn 72	2	3
0.875471	Burn 72	2	3
1.58088	Burn 72	2	3
1.52658	Burn 72	2	3
1.71274	Burn 72	2	3
0.834687	Burn 72	2	3
1.53416	Burn 72	2	3
1.41644	Burn 72	2	3
0.86369	Burn 72	2	3
1.32464	Burn 72	2	3
1.51024	Burn 72	2	3
0.801791	Burn 72	2	3
1.46151	Burn 72	2	3
1.70794	Burn 72	2	3
1.59152	Burn 72	2	3
1.51037	Burn 72	2	3
1.48336	Burn 72	2	3
1.63308	Burn 72	2	3
1.94023	Burn 72	2	3
1.32081	Burn 72	2	3
1.57907	Burn 72	2	3
1.06325	Burn 72	2	3
1.7238	Burn 72	2	3
1.4018	Burn 72	2	3
1.58921	Burn 72	2	3
1.76394	Burn 72	3	3
1.40824	Burn 72	3	3
1.49574	Burn 72	3	3
1.93292	Burn 72	3	3
1.87893	Burn 72	3	3
1.55477	Burn 72	3	3
1.58201	Burn 72	3	3
1.31974	Burn 72	3	3
1.61655	Burn 72	3	3
1.85072	Burn 72	3	3
1.76686	Burn 72	3	3
1.73548	Burn 72	3	3
1.58558	Burn 72	3	3
1.6319	Burn 72	3	3
1.71078	Burn 72	3	3
1.52172	Burn 72	3	3
1.14302	Burn 72	3	3
0.697518	Burn 72	3	3
1.48993	Burn 72	3	3
1.61163	Burn 72	4	3
1.55749	Burn 72	4	3
0.916342	Burn 72	4	3
1.72501	Burn 72	4	3
1.58818	Burn 72	4	3
1.61653	Burn 72	4	3
1.50965	Burn 72	4	3
1.68552	Burn 72	4	3
1.58533	Burn 72	4	3
1.57192	Burn 72	4	3
1.56077	Burn 72	4	3
1.83529	Burn 72	4	3
1.61593	Burn 72	4	3
1.64028	Burn 72	4	3
0.57448	Burn 72	4	3
1.69993	Burn 72	4	3
1.42992	Burn 72	4	3
1.56195	Burn 72	4	3
1.64271	Burn 72	4	3
1.89526	Burn 72	4	3
1.63131	Burn 72	4	3
1.87821	Burn 72	4	3
2.00376	Burn 72	4	3
1.42617	Burn 72	4	3
1.81145	Burn 72	4	3
1.33214	Burn 72	4	3
1.49985	Burn 72	4	3
1.74038	Burn 72	4	3
1.52889	Burn 72	4	3
0.902357	Burn 72	4	3
1.71493	Burn 72	4	3
1.04649	Burn 72	4	3
1.29519	Burn 72	4	3
1.53895	Burn 72	4	3
1.73337	Burn 72	4	3
1.97948	Burn 72	4	3
1.11038	Burn 72	4	3
1.57128	Burn 72	4	3
1.60521	Burn 72	4	3
1.21321	Burn 72	4	3
1.38538	Burn 72	4	3
1.57284	Burn 72	4	3
1.70093	Burn 72	4	3
1.47711	Burn 72	4	3
1.55918	Burn 72	4	3
1.44505	Burn 72	4	3
1.55615	Burn 72	4	3

## Sheet: FLIM statistics
Statistical results of zebrafish autofluorescence data
Mean+/-95%CI
Comparison between groups showing the overall effect; computed as fold change (ratio) or simple difference with 95%CI and p values; p<0.05
FIGURE 4	NAD(P)H tm (ps)	NAD(P)H t1 (ps)	NAD(P)H t2 (ps)	NAD(P)H a1 (%)*	FAD tm (ps)	FAD t1 (ps)	FAD t2 (ps)	FAD a1 (%)	Optical redox ratio*	OMI index*
Tt 24 hpw	755 (715, 797)	306 (289, 325)	2250 (2170, 2340)	76.4 (75.5, 77.2)	569 (523, 619)	344 (305, 387)	1680 (1620, 1760)	78.6 (77.2, 79.9)	0.70 (0.69, 0.72)	0.969 (0.923, 1.015)
Burn 24 hpw	700 (669, 733)	274 (264, 284)	2220 (2150, 2300)	77.7 (77.1, 78.4)	563 (533, 596)	326 (305, 348)	1720 (1660, 1780)	79.1 (78.2, 79.9)	0.64 (0.63, 0.66)	0.790 (0.749, 0.832)
Tt 72 hpw	1010 (969, 1050)	398 (371, 427)	2830 (2720, 2950)	73.4 (72.9, 74.0)	526 (491, 565)	283 (257, 311)	1690 (1610, 1790)	78.1 (77.0, 79.3)	0.76 (0.74, 0.78)	1.380 (1.277, 1.484)
Burn 72 hpw	965 (927, 1010)	396 (375, 419)	2830 (2740, 2920)	75.2 (74.1, 76.2)	501 (442, 567)	288 (245, 339)	1610 (1520, 1720)	79.0 (77.8, 80.3)	0.75 (0.74, 0.76)	1.322 (1.274, 1.371)
Tt / Burn at 24h; p value	1.06 (1.02, 1.12); 0.011	1.12 (1.05, 1.19); <0.001	p=0.880	-1.15 (-1.07, -1.23); <0.001	p=0.764	p=0.680	p=0.278	p=0.591	0.06 (0.04, 0.08); <0.001	0.179 (0.118, 0.240), <0.001
Tt / Burn at 72h; p value	1.06 (1.02, 1.12); 0.011	p=0.919	p=0.880	-1.15 (-1.07, -1.23); <0.001	p=0.764	p=0.680	p=0.278	p=0.591	0.01 (-0.01, 0.03); 0.370	0.058 (-0.054, 0.169); 0.312
72 / 24h for Tt; p value	1.37 (1.30, 1.43); <0.001	1.30 (1.19, 1.41); <0.001	1.26 (1.22, 1.31); <0.001	-1.27 (-1.17, -1.36); <0.001	-1.10 (-1.00, -1.18); 0.030	-1.12 (-1.02, -1.23); 0.022	p=0.278	p=0.591	0.06 (0.04, 0.08); <0.001	0.411 (0.301, 0.521); <0.001
72 / 24h for Burn; p value	1.37 (1.30, 1.43); <0.001	1.45 (1.37, 1.53); <0.001	1.26 (1.22, 1.31); <0.001	-1.27 (-1.17, -1.36); <0.001	-1.10 (-1.00, -1.18); 0.030	-1.12 (-1.02, -1.23); 0.022	p=0.278	p=0.591	0.11 (0.09, 0.13); <0.001	0.532 (0.469, 0.595); <0.001
* comparison computed as a simple difference and represents percentage points of change; others are computed as a fold change (ratio)
