# Supplementary material for: In vivo fluorescence lifetime imaging of macrophage intracellular metabolism during wound responses in zebrafish
Source: eLife. 2022 Feb 24;11:e66080. doi: 10.7554/eLife.66080 (PMC8871371; doi:10.7554/eLife.66080)
Supplement: Figure 5—source data 1. [file elife-66080-fig5-data1.xlsx]

## Sheet: 5B-TNF
replicate	condition	TNF+/macrophage (%)
1	Control	0.386977
1	Control	0.0503937
1	Control	0.593367
1	Control	0.447334
1	Control	0.534301
1	Control	0.3237
1	Control	0.696949
1	Metformin	0.267186
1	Metformin	0.0620497
1	Metformin	0.271471
1	Metformin	0.245927
1	Metformin	0.235661
1	Metformin	0.146631
1	Metformin	0.351686
2	Control	0.894424
2	Control	0.681109
2	Control	0.563923
2	Control	0.833905
2	Control	0.263769
2	Control	0.40938
2	Control	0.752834
2	Control	0.696811
2	Control	0.577117
2	Control	0.521583
2	Control	0.531039
2	Control	0.542825
2	Control	0.603139
2	Control	0.815005
2	Control	0.722147
2	Metformin	0.671658
2	Metformin	0.750196
2	Metformin	0.632748
2	Metformin	0.125719
2	Metformin	0.497422
2	Metformin	0.60212
2	Metformin	0.218404
2	Metformin	0.611511
2	Metformin	0.506683
2	Metformin	0.443153
2	Metformin	0.376852
2	Metformin	0.569827
2	Metformin	0.524433
2	Metformin	0.405953
2	Metformin	0.476039
3	Control	0.294717
3	Control	0.360867
3	Control	0.706957
3	Control	0.446815
3	Control	0.469311
3	Control	0.666764
3	Control	0.479299
3	Control	0.59942
3	Control	0.297015
3	Control	0.407262
3	Control	0.416368
3	Control	0.406429
3	Control	0.34628
3	Control	0.332777
3	Control	0.0929608
3	Control	0.531965
3	Control	0.431849
3	Control	0.529282
3	Control	0.506904
3	Control	0.73088
3	Metformin	0.473433
3	Metformin	0.511972
3	Metformin	0.619118
3	Metformin	0.433014
3	Metformin	0.196547
3	Metformin	0.306932
3	Metformin	0.613761
3	Metformin	0.49812
3	Metformin	0.161169
3	Metformin	0.568196
3	Metformin	0.305544
3	Metformin	0.268541
3	Metformin	0.447238
3	Metformin	0.531876
3	Metformin	0.546757
3	Metformin	0.29693
3	Metformin	0.638035
3	Metformin	0.3
3	Metformin	0.343992
3	Metformin	0.566086
3	Metformin	0.487191
3	Metformin	0.083544
3	Metformin	0.422094
3	Metformin	0.422973

## Sheet: Figure 5
F.a1.out	F.t1.out	F.t2.out	F.tm.out	N.a1.out	N.t1.out	N.t2.out	N.tm.out	rr.out	Group	Fish	Repeat	count
80.0364	367.46	2023.71	597.589	81.5427	457.057	2746.2	871.319	0.851552	Control	1	1	268
78.8508	359.086	1703.94	566.523	77.7454	471.116	3149.96	1040.82	0.8398	Control	1	1
79.551	232.852	1155.69	380.882	86.5901	387.158	2767.3	682.838	0.792566	Control	1	1
80.3165	310.693	1396.56	451.597	81.6131	437.277	2738.6	846.06	0.830583	Control	1	1
80.0549	254.049	1222.86	409.09	85.3669	402.94	2667.86	725.039	0.795004	Control	1	1
79.6871	300.683	1336.37	456.877	81.9295	417.613	2738.12	831.224	0.823374	Control	1	1
80.7938	216.65	1144.81	358.747	84.777	331.899	2432.38	634.498	0.683524	Control	1	1
80.4971	283.794	1335.13	440.91	82.282	385.427	2755.59	790.016	0.795633	Control	1	1
78.1957	331.53	1437.32	524.748	79.5484	379.874	2544.28	820.431	0.762016	Control	1	1
78.9167	210.69	1201.69	383.366	77.7151	380.304	3131.47	979.91	0.718448	Control	1	1
84.0262	335.475	1538.46	486.495	84.8189	447.676	2944.18	812.535	0.838648	Control	1	1
78.4632	188.572	1141.32	369.063	83.5976	278.325	2186.91	587.851	0.605082	Control	1	1
79.6048	201.35	1107.36	358.447	82.1234	353.363	2747.32	774.038	0.705957	Control	1	1
80.1624	197.627	1235.84	375.694	79.9667	312.768	2509.57	751.498	0.687125	Control	1	1
79.6118	203.62	1088.63	347.501	80.3868	340.059	2628.51	779.095	0.752745	Control	1	1
79.4561	244.726	1375.3	436.14	77.6986	388.476	2658.07	888.068	0.783401	Control	1	1
80.6789	222.558	1207.65	379.594	84.0956	313.566	2462.46	653.262	0.647736	Control	1	1
78.8666	251.332	1313.99	422.83	82.3302	369.693	2565.56	752.276	0.779997	Control	1	1
75.179	245.142	1330.78	483.692	78.4073	381.3	2639.74	853.538	0.742115	Control	1	1
79.081	191.27	1216.8	382.872	81.4898	285.159	2338.58	676.143	0.591122	Control	1	1
78.447	205.679	985.094	344.79	85.3539	364.609	2561.29	676.694	0.742393	Control	1	1
81.0417	183.568	1156.29	333.403	82.3628	285.774	2509.49	673.891	0.680821	Control	1	1
79.3004	332.213	1199.8	456.629	83.3854	432.657	2857.43	825.311	0.829165	Control	1	1
81.6318	222.681	1277.5	384.175	78.1392	396.356	2990.63	942.616	0.764908	Control	1	1
76.9717	331.418	1975.17	606.451	73.2825	519.978	3149.56	1196.68	0.787983	Control	1	1
77.2643	354.74	1348.17	519.459	81.1346	436.039	2816.34	866.374	0.838193	Control	1	1
81.5776	238.857	1147.28	379.782	84.8313	353.3	2497.58	663.379	0.784138	Control	1	1
77.7667	326.485	1517.23	510.173	80.074	453.837	3033.42	957.284	0.853808	Control	1	1
78.7192	379.71	1902.05	608.48	80.2617	500.63	3315.98	1020.1	0.84814	Control	1	1
78.3799	293.429	1423.95	488.722	77.4006	476.327	3002.03	1013.85	0.774305	Control	1	1
78.9006	379.059	1599.9	544.96	78.9163	495.927	3116.28	1027.29	0.833612	Control	1	1
76.5018	185.199	1162.65	385.861	79.8895	273.292	2300.59	681.294	0.606381	Control	1	1
81.5076	213.486	1331.2	373.397	79.097	313.235	2697.39	804.042	0.755736	Control	1	1
80.2269	171.427	1135.38	336.702	81.7783	294.99	2417.1	679.568	0.684433	Control	1	1
81.7708	164.953	1087.64	311.584	83.9978	245.171	2179.29	552.982	0.667169	Control	1	1
79.0744	230.826	1481.11	452.11	76.1375	288.251	2544.05	823.793	0.67008	Control	1	1
82.0295	166.158	1113.38	317.922	85.5612	263.775	2263.08	551.288	0.610643	Control	1	1
79.5298	201.401	1186.9	377.411	81.0026	304.074	2491.25	718.424	0.694393	Control	1	1
78.3016	200.377	1070.31	359.823	83.2229	284.853	2276.51	620.166	0.648571	Control	1	1
80.2457	180.03	1165.24	354.703	82.7458	268.312	2383.66	629.075	0.644352	Control	1	1
78.7923	210.289	1262.63	397.165	80.0738	328.423	2701.53	802.329	0.77094	Control	1	1
80.4368	179.951	1029	329.46	85.8494	255.536	2172.75	531.915	0.633686	Control	1	1
79.9585	224.88	1364.16	414.584	79.7061	352.777	2696.98	824.136	0.794895	Control	1	1
79.0426	214.914	1145.35	375.666	81.5076	342.464	2681.55	775.653	0.727138	Control	1	1
81.3177	287.505	1403.57	453.436	81.8866	427.869	3007.62	887.016	0.824835	Control	1	1
81.4912	199.707	1203.73	361.703	82.6897	280.579	2356.53	643.4	0.673644	Control	1	1
76.936	239.822	1276.92	449.624	78.3562	339.884	2648.27	836.973	0.720918	Control	1	1
79.5351	220.529	1389.01	409.247	76.6169	320.099	2692.99	892.605	0.719658	Control	1	1
82.008	174.705	1196.79	336.351	76.6349	318.35	2764.9	888.562	0.710789	Control	1	1
78.6301	251.776	1504.46	449.797	70.0425	437.899	2900.93	1160.78	0.824872	Control	1	1
79.8685	189.541	1163.8	353.83	84.2813	281.747	2251.73	594.848	0.649242	Control	1	1
82.4375	328.342	1360.38	454.811	86.1041	423.699	2576.48	705.774	0.838796	Control	1	1
80.776	195.943	1152.49	349.677	82.273	327.677	2575.76	721.167	0.721127	Control	1	1
79.6493	226.726	1193.44	390.034	80.2298	335.482	2777.77	817.026	0.749012	Control	1	1
80.0113	254.81	1250.26	413.275	83.0927	388.876	2623.5	762.201	0.757738	Control	1	1
79.6997	224.224	1296.12	410.796	81.3663	317.121	2499.4	719.205	0.729658	Control	1	1
79.4796	175.153	1180.26	356.808	78.0885	248.438	2849.52	821.914	0.688714	Control	1	1
79.6396	343.766	1766.48	530.866	73.6026	432.448	3016.33	1099.1	0.819324	Control	1	1
79.7605	306.882	1453.01	485.844	80.8759	434.733	2868.02	893.777	0.818	Control	1	1
80.6802	290.228	1119.06	399.14	85.2155	444.973	3085.29	826.685	0.823997	Control	1	1
79.2548	226.909	1432.54	433.133	70.8181	313.306	3187.84	1176.96	0.780955	Control	1	1
84.1196	309.874	1439.26	454.304	85.3864	392.814	2639	716.37	0.801745	Control	1	1
66.0122	209.592	1460.34	591.157	73.9127	274.753	2416.76	832.818	0.553512	Control	1	1
80.8675	301.799	1595.59	481.154	79.3839	389.247	3157.25	962.815	0.81305	Control	1	1
78.4059	393.267	2642.99	822.607	64.1212	430.253	3351.48	1498.95	0.866975	Control	1	1
66.2293	348.061	1768.8	793.059	71.5026	401.685	2360.02	943	0.608102	Control	1	1
80.5023	267.085	1315.64	434.206	79.0812	395.887	2682.1	862.789	0.789689	Control	1	1
80.9497	182.87	1109.86	332.927	83.7583	307.367	2410.8	636.037	0.658683	Control	1	1
78.9143	200.803	1131.2	375.026	83.629	310.011	2324.11	634.125	0.635497	Control	1	1
72.5934	334.997	1465.11	621.899	78.6292	394.32	2466.54	811.159	0.696334	Control	1	1
79.0926	207.126	1303.1	409.563	81.2661	288.235	2311.25	655.912	0.606517	Control	1	1
80.8996	189.92	1158.52	339.347	78.4274	557.166	2839.81	1025.6	0.863862	Control	1	1
80.5863	283.029	1426.11	457.449	79.402	418.241	2819	878.976	0.798562	Control	1	1
78.8075	388.706	2049.77	658.717	80.4059	502.189	3291.46	1012.16	0.836674	Control	1	1
76.7596	256.041	1380.46	467.333	75.3619	377.893	2821.04	955.248	0.733146	Control	2	1
81.3697	190.979	1258.68	359.364	76.2316	354.537	2762.1	913.796	0.692829	Control	2	1
82.1445	200.087	1329.11	371.29	78.6717	314.358	2430.51	763.498	0.683604	Control	2	1
78.5967	295.308	1657.23	521.73	72.7985	446.92	2983.23	1115.62	0.797279	Control	2	1
76.4924	414.058	1992.12	692.327	70.4242	528.538	4229.09	1408.01	0.839814	Control	2	1
84.0584	232.518	1573.25	419.996	65.4817	444.247	3056.56	1328.14	0.83539	Control	2	1
77.717	325.722	1725.43	563.55	72.0007	460.125	3361.97	1188.73	0.784849	Control	2	1
80.4117	211.849	1262.5	379.82	82.0612	383.942	2745.52	789.823	0.721668	Control	2	1
78.3119	285.386	1756.32	566.946	74.4571	455.588	3100.8	1101.57	0.762653	Control	2	1
79.4627	256.312	1530.04	473.814	75.5815	387.978	2691.64	960.012	0.717298	Control	2	1
77.9312	378.522	1935.6	644.772	76.6289	462.264	3129.17	1043.92	0.788959	Control	2	1
82.2173	228.481	1343.69	390.468	80.3519	373.902	2754.7	847.955	0.768881	Control	2	1
85.1472	111.573	815.716	202.181	89.9382	232.511	2426.54	422.683	0.638406	Control	2	1
80.7772	260.145	1783.25	509.871	74.5071	350.669	3082.42	1021.35	0.79137	Control	2	1
76.0469	364.852	1875.12	625.332	67.0445	519.422	3033.01	1323.33	0.826098	Control	2	1
85.3412	253.344	1665.92	446.06	78.7103	363.387	2785.69	868.132	0.753995	Control	2	1
78.5692	265.855	1709.11	516.139	72.0769	401.424	2863.97	1067.32	0.736861	Control	2	1
79.905	250.81	1528.61	443.018	72.7735	436.618	2986.23	1084.22	0.766207	Control	2	1
78.5934	240.978	1345.79	436.486	77.336	359.936	2699.93	883.579	0.692325	Control	2	1
78.9592	193.981	1131.28	365.645	81.9123	321.02	2322.77	684.433	0.651689	Control	2	1
78.2355	345.43	1619.07	556.235	74.8598	462.244	2899.98	1063.45	0.834448	Control	2	1
79.8582	304.581	2033.75	595.564	71.9347	412.047	2817.19	1075.63	0.757686	Control	2	1
79.1183	230.465	1451.8	451.096	75.5425	357.387	2637.78	911.545	0.726333	Control	2	1
82.6943	336.44	1281.32	457.845	82.2982	434.445	2837.22	852.546	0.849221	Control	2	1
78.9835	325.315	1073.59	443.7	83.0304	442.922	3001.76	865.51	0.847831	Control	2	1
76.7365	248.498	1660.81	540.417	71.2523	394.999	2786.39	1069.46	0.710925	Control	2	1
79.2724	204.463	1276.65	397.075	80.9164	317.47	2404.64	723.117	0.672345	Control	2	1
80.928	238.499	1419.18	432.117	74.5863	379.917	2860.09	999.513	0.750232	Control	2	1
72.7298	350.732	1904.31	665.666	65.4348	479.289	3430.56	1386.24	0.825021	Control	2	1
76.4778	356.537	1780.78	624.661	67.4033	468.786	3297.52	1364.71	0.80508	Control	2	1
77.6589	304.615	1811.34	553.79	69.3913	385.162	2609.8	1054.27	0.788202	Control	2	1
82.7902	287.939	1753.61	491.231	72.7638	467.755	3249.35	1197.01	0.814452	Control	2	1
81.0216	220.258	1586.78	440.924	65.1885	355.885	2881.2	1227.51	0.787268	Control	2	1
77.1418	260.08	1674.34	531.884	71.654	376.357	2957.98	1101.18	0.743937	Control	2	1
78.1267	351.33	1634.44	578.896	71.2134	453.663	2920.35	1138.09	0.816396	Control	2	1
79.7027	152.585	949.135	298.256	81.6344	256.246	2353.33	641.655	0.624195	Control	2	1
77.2818	379.466	1856.08	635.396	73.7004	469.13	3076.07	1127.12	0.842346	Control	2	1
78.7944	310.973	1981.94	620.685	67.1099	477.402	2962.14	1277.75	0.806685	Control	2	1
76.7339	414.491	2381.92	754.344	70.3923	528.983	3468.59	1313.69	0.836362	Control	2	1
77.513	322.36	1828.66	579.876	72.096	435.43	2944	1117.99	0.82898	Control	2	1
78.4655	299.706	1824.13	583.774	63.2883	521.188	3128.46	1435.21	0.795213	Control	2	1
77.7364	343.819	1901.48	615.72	71.8314	478.414	3081.83	1179.46	0.811573	Control	2	1
77.7532	354.254	1836.22	611.002	71.5809	417.135	2921.63	1109.65	0.820626	Control	2	1
77.4071	295.577	1722.4	559.797	70.7468	470.924	2903	1163.26	0.793775	Control	2	1
82.3796	165.708	1092.58	309.95	81.6574	270.964	2343.18	649.005	0.691591	Control	2	1
81.4824	174.567	1140.36	333.405	81.5541	265.938	2180.14	636.651	0.6457	Control	2	1
78.4514	276.914	1609.23	514.485	69.9105	496.8	3294.74	1231.68	0.812869	Control	2	1
79.5183	300.108	1581.22	506.866	74.7009	409.826	3284.46	1073.23	0.798991	Control	2	1
82.3283	224.779	1253.66	375.292	81.1514	371.334	2606.73	784.734	0.774811	Control	2	1
80.6351	257.584	1399.4	429.96	76.984	372.859	2593.85	865.102	0.801048	Control	2	1
79.4297	253.682	1341.16	434.675	78.7447	379.236	2726.5	879.398	0.794081	Control	2	1
84.2893	242.605	1329.55	374.057	84.0703	357.186	2588.09	690.38	0.754083	Control	2	1
78.1988	227.34	1163.14	400.592	82.5883	348.597	2555.32	728.878	0.712984	Control	3	1
79.9526	274.282	1464.59	476.624	81.8679	357.025	2421.96	735.479	0.753496	Control	3	1
79.5311	237.793	1271.15	415.564	81.0594	323.119	2551.1	747.317	0.727638	Control	3	1
79.7592	368.087	1889.26	593.616	68.5212	504.203	3521.57	1404.94	0.862683	Control	3	1
80.2597	304.514	1788.56	551.321	70.5171	413.05	3008.1	1168.84	0.801049	Control	3	1
77.1299	261.191	1478.13	488.31	76.0088	382.807	2827.38	969.799	0.774622	Control	3	1
74.8181	210.688	1296.5	453.751	79.0572	327.315	2313.49	740.06	0.622439	Control	3	1
76.4669	267.08	1349.78	480.875	79.4022	368.101	2621	823.085	0.714833	Control	3	1
79.1341	387.736	2037.38	630.709	68.7745	456.362	3140.77	1255.29	0.854419	Control	3	1
77.5665	216.269	1248.59	415.14	80.67	326.774	2300.89	698.332	0.679374	Control	3	1
77.644	378.178	1094.68	478.144	84.856	446.121	2773.26	789.14	0.851434	Control	3	1
78.302	322.395	1472.52	497.994	75.3202	427.887	2727.55	989.057	0.816392	Control	3	1
78.8903	404.154	1558.09	558.125	79.7153	514.119	3297.96	1049.01	0.859211	Control	3	1
80.4284	304.891	1533.31	497.632	74.4682	442.65	2948.79	1044.88	0.805198	Control	3	1
77.0307	316.908	1548.51	535.789	78.9806	465.539	2941.27	979.475	0.823755	Control	3	1
80.4643	361.248	1598.27	539.055	79.3523	462.069	3012.5	975.127	0.848919	Control	3	1
64.7167	344.329	1924.95	854.78	58.0679	454.638	2479.56	1307.05	0.692346	Control	3	1
76.6274	356.391	1805.68	618.36	71.3403	535.575	3223.72	1271.67	0.81146	Control	3	1
82.0474	327.857	1515.36	475.544	77.1197	474.23	3006.02	1017.44	0.831718	Control	3	1
78.1602	345.365	1763.8	566.836	78.7031	492.027	3198.96	1042.99	0.839625	Control	3	1
76.7262	251.841	1230.99	437.996	81.3064	373.468	2578.08	774.941	0.724097	Control	3	1
76.4938	237.233	1333	451.898	78.5115	345.806	2828.51	872.302	0.675002	Control	3	1
75.6965	217.619	1279.19	442.036	79.6922	318.043	2517.38	760.26	0.647575	Control	3	1
78.0173	271.222	1485.97	493	74.5032	375.672	2958.45	1013.22	0.729178	Control	3	1
77.7746	243.639	1271.81	433.738	81.4175	348.547	2426.87	731.035	0.706068	Control	3	1
76.8889	213.114	1209.49	417.135	80.1516	299.568	2228.92	685.57	0.64502	Control	3	1
77.8501	253.795	1389.56	463.041	81.3578	369.575	2482.84	755.759	0.704401	Control	3	1
79.3862	251.732	1227.08	420.727	83.1725	384.501	2637.87	757.252	0.755076	Control	3	1
76.7436	226.008	1289.27	429.424	76.4823	345.758	2606.94	878.406	0.741677	Control	3	1
76.4661	231.252	1273.49	441.999	79.5063	348.21	2658.11	807.739	0.688191	Control	3	1
77.1313	226.141	1254.35	426.58	80.4219	327.178	2389.39	727.44	0.696923	Control	3	1
79.0642	269.964	1414.27	465.293	81.8016	385.49	2498	770.679	0.77852	Control	3	1
77.2156	227.447	1387.92	459.655	75.8891	322.079	2691.8	883.728	0.693461	Control	3	1
75.9476	217.063	1270.34	444.378	81.0381	310.431	2228	671.634	0.626621	Control	3	1
78.3839	227.908	1240.32	410.608	80.8604	344.963	2581.72	753.107	0.670936	Control	3	1
77.3559	247.403	1336.04	458.269	79.2805	341.033	2445.61	765.391	0.673066	Control	3	1
78.4165	258.064	1298.39	451.324	81.1474	345.473	2485.86	745.638	0.6871	Control	3	1
80.0969	198.157	1218.42	372.337	79.1549	304.652	2448.43	745.627	0.682731	Control	3	1
79.3706	202.398	1257.06	384.872	78.9529	329.225	2455.08	772.051	0.69408	Control	3	1
74.1169	231.954	1519.16	528.261	71.2442	300.134	2577.14	951.152	0.636795	Control	3	1
78.9529	195.612	1185.06	380.235	81.869	274.787	2185.58	621.696	0.622176	Control	3	1
76.2161	222.854	1262.32	439.06	79.0456	319.626	2367.77	745.397	0.668726	Control	3	1
73.3336	269.723	1222.15	455.172	74.455	393.794	2722.01	961.942	0.770196	Control	3	1
79.6377	276.515	1420.93	467.765	79.4919	412.861	2774.72	895.557	0.775188	Control	3	1
78.0719	197.588	1221.02	394.231	78.4314	314.817	2541.78	792.594	0.676583	Control	3	1
76.3176	226.742	1258.45	440.05	77.6142	335.303	2416.24	798.307	0.627096	Control	3	1
79.4429	188.755	1130.39	359.776	81.0626	312.556	2369.72	698.914	0.64673	Control	3	1
69.6287	517.657	1805.99	847.302	65.7577	368.487	2914.68	1240.36	0.734652	Control	3	1
76.5618	243.422	1268.76	451.434	79.6396	375.101	2575.98	812.462	0.680922	Control	3	1
78.0519	234.097	1569.3	480.103	72.8741	440.058	3350.49	1216.94	0.7853	Control	3	1
76.3459	255.332	1739.99	537.594	53.6114	403.889	3324.53	1754.7	0.796821	Control	3	1
77.7941	226.271	1181.48	403.327	81.1467	359.443	2529.02	764.718	0.749243	Control	3	1
75.4473	243.4	1360.57	481.507	76.1579	373.958	2402.97	847.963	0.665024	Control	3	1
71.8305	245.973	1367.3	524.277	68.9369	365.397	2452.89	1008.15	0.676993	Control	3	1
76.4726	265.471	1382.38	497.282	81.7237	265.231	2248.81	610.861	0.608114	Control	3	1
73.8064	275.392	1570.32	568.353	67.4249	397.758	2451.35	1053.23	0.625265	Control	3	1
76.6913	319.229	1929.88	593.876	73.8645	553.016	3338	1252.03	0.834324	Control	3	1
76.2994	302.521	1514.81	520.19	76.8004	361.219	2695.71	878.306	0.691194	Control	3	1
76.1826	366.177	1702.25	597.926	73.9378	467.966	3018.67	1103.13	0.779539	Control	3	1
77.399	214.168	1315.84	429.627	78.5345	296.436	2545.54	779.802	0.677657	Control	3	1
79.5823	173.191	1044.99	329.239	83.1105	308.247	2416.02	655.853	0.650744	Control	3	1
79.9508	210.411	1301.13	384.453	77.3826	279.506	2576.65	789.026	0.652533	Control	3	1
74.245	189.276	1059.08	379.975	77.9458	301.237	2113.6	688.197	0.633417	Control	3	1
75.9798	220.597	1277.27	445.838	78.513	309.66	2334.78	741.356	0.603737	Control	3	1
77.4128	161.586	1035.32	339.909	75.7656	320.744	2443.26	832.637	0.660247	Control	3	1
80.1355	200.393	1233.62	386.396	85.7254	268.407	2114.08	528.614	0.616932	Control	3	1
79.5816	229.438	1262.36	409.94	81.1932	337.909	2532.13	743	0.685462	Control	3	1
77.8644	290.156	1433.78	497.991	77.836	404.308	2835.47	900.062	0.638263	Control	3	1
68.5279	407.602	1496.14	583.734	75.0139	519.449	3044.37	1119.24	0.855104	Control	3	1
79.5674	253.562	1504.11	471.556	77.3519	379.139	2819.98	918.551	0.751266	Control	3	1
78.2397	363.246	1686.94	596.554	75.7577	491.972	2928.23	1065.02	0.831937	Control	3	1
76.7272	342.059	1562.05	531.838	81.805	459.347	2835.88	890.182	0.848637	Control	3	1
78.087	317.757	1650.99	539.568	77.4055	419.496	2825.05	961.864	0.800536	Control	3	1
78.6462	262.33	1418.18	457.057	77.8417	410.225	2921.95	952.96	0.772466	Control	3	1
69.273	517.053	1402.32	720.736	76.6096	425.225	1981.94	792.141	0.68485	Control	3	1
80.4807	284.209	1455.03	473.455	79.136	423.649	3100.34	967.166	0.79476	Control	3	1
78.868	287.362	1431.55	473.013	79.5684	412.769	3091.74	948.994	0.803375	Control	3	1
78.1681	371.852	1566.12	579.414	78.8871	440.885	2828.95	929.277	0.822479	Control	3	1
74.625	283.849	1799.97	588.463	48.4302	408.306	3356.12	1928.02	0.81284	Control	3	1
77.4807	246.116	1188.14	421.032	75.3055	345.954	2866.44	961.259	0.7691	Control	3	1
73.8654	238.68	1310.09	474.46	73.6435	353.297	2541.91	918.693	0.686278	Control	3	1
78.0788	269.862	1546.64	499.99	73.3271	397.516	2705.32	997.223	0.738472	Control	3	1
77.5146	328.308	1483.54	517.704	79.4061	453.842	2985.16	962.744	0.804063	Control	3	1
83.7988	281.051	1495.06	451.244	81.874	411.17	2995.2	877.174	0.817563	Control	3	1
71.53	465.445	2119.36	811.125	66.4706	557.125	3519.72	1483.17	0.796476	Control	3	1
77.9291	229.924	1692	500.299	70.8937	352.583	3093.04	1157.6	0.776664	Control	3	1
83.1879	319.437	1570.36	471.701	73.475	458.934	2967.8	1114.84	0.838974	Control	3	1
79.82	318.562	1213.22	455.569	84.0192	445.205	2911.09	809.306	0.866429	Control	3	1
67.17	306.802	1473.69	660.795	78.9587	346.319	2270.88	713.649	0.651058	Control	3	1
74.9437	385.424	1455.76	570.024	78.4968	505.581	3126.48	1038.86	0.865809	Control	3	1
46.4028	168.613	1020.95	357.419	78.1789	431.632	2601.69	892.884	0.822787	Control	3	1
77.7016	462.796	1908.88	691.836	71.0926	534.918	3396.31	1312.7	0.849824	Control	3	1
75.2257	275.045	1105.39	458	87.0761	433.647	2735.03	731.075	0.852569	Control	3	1
77.4028	370.362	1483.62	557.169	79.7643	488.515	2993.53	979.06	0.836588	Control	3	1
77.3068	394.041	1721.71	593.671	79.4092	485.276	3127.19	999.921	0.817285	Control	3	1
78.4373	217.428	1224.37	384.542	79.5694	498.471	3043.82	996.067	0.820967	Control	3	1
77.0597	268.199	1326.68	447.393	76.6956	422.614	2639.97	935.295	0.770034	Control	3	1
77.2374	347.458	1472.16	512.43	80.9575	461.521	2843.3	895.001	0.850542	Control	3	1
79.0924	367.123	1307.78	510.239	85.283	467.568	2985.65	826.497	0.84653	Control	3	1
77.1368	224.316	1357.81	449.581	78.0615	310.007	2413.59	778.471	0.633361	Control	4	1
77.8972	217.575	1368.13	433.947	76.5933	319.947	2640.57	869.686	0.699239	Control	4	1
80.5622	220.442	1256.51	385.212	80.7148	401.746	2791.02	866.413	0.762297	Control	4	1
79.4266	202.95	1098.51	364.582	82.6261	322.646	2387.35	676.344	0.642252	Control	4	1
68.6515	283.5	1432.53	590.92	75.8726	357.499	2472.93	862.083	0.593254	Control	4	1
76.8887	264.024	1588.49	518.48	73.2268	375.252	2664.64	979.835	0.684283	Control	4	1
78.9199	282.396	1559.65	499.808	77.791	399.344	3060.86	971.492	0.732945	Control	4	1
79.1553	255.804	1514.63	475.229	75.8863	331.189	2447.18	837.821	0.634333	Control	4	1
77.936	295.805	1362.9	488.893	79.6898	406.897	2575.9	838.926	0.783115	Control	4	1
78.7893	271.754	1491.46	467.982	78.8979	378.347	2800.18	883.845	0.774497	Control	4	1
73.5628	338.413	1297.61	501.443	82.9516	470.19	3242.76	878.416	0.848441	Control	4	1
81.1381	273.44	1365.17	442.904	83.2079	378.538	2503.87	724.928	0.741863	Control	4	1
79.9322	331.925	1496.3	520.741	76.6149	456.689	2812.9	994.008	0.821999	Control	4	1
67.4832	329.178	1049.09	501.873	82.5943	425.699	3157.64	899.708	0.789082	Control	4	1
79.7711	284.24	1312.45	453.095	81.9848	406.634	2722.2	818.318	0.809391	Control	4	1
78.8285	373.568	1687.32	585.413	76.5837	482.691	2958.66	1033.63	0.806178	Control	4	1
76.339	347.645	1380.25	549.845	77.2701	392.749	2515.98	856.617	0.710293	Control	4	1
79.6744	226.649	1189.17	400.261	84.6994	347.21	2453.84	646.268	0.653893	Control	4	1
79.404	326.525	1850.8	552.714	79.3901	436.289	3118.01	943.757	0.803853	Control	4	1
76.9705	366.687	1796.29	615.904	66.631	435.664	3034.79	1297.17	0.848421	Control	4	1
79.0839	390.623	1554.31	541.737	82.2021	477.725	2961.78	907.762	0.851294	Control	4	1
78.2238	328.96	1625.65	544.141	75.0753	498.571	3169.51	1135.94	0.78061	Control	4	1
79.8065	226.264	1278.39	402.639	83.0384	356.032	2431.63	695.409	0.642587	Control	4	1
80.5845	198.028	1221.78	359.877	77.8229	363.597	2670.45	855.043	0.693162	Control	4	1
83.0297	242.223	1709.9	443.449	68.5503	322.546	2762.99	1086.08	0.733458	Control	4	1
79.8611	248.565	1406.72	437.141	79.3969	375.881	2788.31	865.798	0.757801	Control	4	1
81.7521	285.581	1473.11	460.961	73.3266	442.739	3095.11	1116.29	0.702507	Control	4	1
79.5164	276.197	1608.09	502.686	75.8031	392.068	2897.7	989.936	0.768581	Control	4	1
77.8633	223.742	1482.48	453.541	73.564	361.78	2683.01	967.524	0.675028	Control	4	1
67.0387	254.762	1529.33	602.256	62.4577	362.46	2567.96	1181.8	0.677703	Control	4	1
79.491	243.764	1581.33	469.42	77.7292	397.433	3039.31	949.261	0.715544	Control	4	1
76.285	217.256	1271.13	432.429	78.7428	317.594	2388.74	748.594	0.63003	Control	4	1
79.0797	242.686	1427.99	443.272	73.5314	377.188	2814.2	1007.12	0.701116	Control	4	1
78.2462	265.036	1344.09	451.411	78.5152	388.356	2794.2	896.953	0.755589	Control	4	1
80.2343	255.798	1436.58	443.088	80.8904	393.053	2710.86	819.219	0.733027	Control	4	1
79.9913	204.788	1295.91	393.483	76.9616	338.63	2715.1	868.976	0.677726	Control	4	1
79.8458	244.766	1452.88	449.695	77.6788	397.903	2885.57	928.147	0.723097	Control	4	1
79.5438	370.279	1468.47	527.852	83.5214	474.433	3416.58	907.165	0.840601	Control	4	1
75.1112	438.606	1700.2	661.722	74.0753	451.406	2632.17	1009.98	0.836418	Control	4	1
83.1759	359.98	1749.37	548.175	77.8791	426.907	2847.26	953.866	0.84261	Control	4	1
78.1349	290.33	1652.16	533.604	77.7937	412.436	2766.82	928.457	0.77711	Control	4	1
76.0726	309.278	1518.83	519.929	75.0969	432.226	2828.19	1013.26	0.805276	Control	4	1
78.1994	376.606	2046.47	650.994	70.6823	543.863	3480.36	1347.48	0.813013	Control	4	1
80.9506	277.575	1313.91	435.954	84.4631	428.219	2798.79	790.6	0.796324	Metformin	1	1	203
81.9672	286.88	1513.23	465.526	82.9568	408.014	2857.8	808.211	0.777915	Metformin	1	1
76.9057	337.092	1914.33	605.008	71.9624	460.024	2964.65	1136.53	0.803383	Metformin	1	1
79.2184	252.578	1382.6	449.051	78.9811	403.078	2825.7	903.382	0.774811	Metformin	1	1
79.3	257.98	1507.69	468.786	72.0439	391.335	2685.36	1025.93	0.788437	Metformin	1	1
77.877	268.846	1700.99	536.83	78.8962	463.918	3173.07	1007.92	0.769495	Metformin	1	1
78.3595	242.301	1286.2	428.611	80.1339	397.641	2880.4	882.254	0.711952	Metformin	1	1
78.1482	268.952	1617.42	522.362	76.9607	386.757	2877.65	949.377	0.742211	Metformin	1	1
81.7188	254.659	1493.87	447.685	80.1902	403.681	2967.66	882.658	0.743068	Metformin	1	1
80.0605	240.922	1336.78	426.209	81.612	386.827	2600.14	798.306	0.770486	Metformin	1	1
81.679	295.222	1650.96	495.118	75.3048	428.878	3190.74	1079.16	0.769911	Metformin	1	1
78.3794	232.166	1207.47	400.814	76.113	417.451	2809.38	978.04	0.797137	Metformin	1	1
79.1479	319.071	1358.89	494.379	84.425	434.761	2921.12	818.76	0.803291	Metformin	1	1
76.9341	342.166	1644.62	577.847	76.661	502.036	2972.36	1054.48	0.839682	Metformin	1	1
81.4223	237.87	1389.73	417.967	82.0158	350.595	2566.29	754.421	0.725977	Metformin	1	1
78.7825	320.971	1714.31	548.725	76.8074	461.931	3052.56	1044.4	0.805148	Metformin	1	1
80.163	233.683	1318.09	426.682	78.8417	345.131	2501.18	785.794	0.685889	Metformin	1	1
78.0833	321.436	1464.66	515.647	77.9172	495.845	3190.04	1073.66	0.816154	Metformin	1	1
67.4663	337.594	1528.05	686.677	72.1632	382.08	2468.65	948.756	0.724251	Metformin	1	1
77.2555	245.248	1426.59	472.12	77.3835	360.613	2617.27	861.913	0.76246	Metformin	1	1
79.4102	322.781	1815.67	571.75	77.7284	493.004	3145.05	1071.24	0.837349	Metformin	1	1
80.6823	412.355	1569.14	568.227	75.2266	499.892	2717.91	1046.75	0.836463	Metformin	1	1
73.8518	392.365	1654.83	633.905	73.7863	483.555	2817.48	1075.18	0.823653	Metformin	1	1
76.0951	438.208	1657.45	648.87	72.0398	549.042	3163.47	1230.85	0.84963	Metformin	1	1
77.434	299.002	1367.08	477.607	76.7462	453.547	2864.1	984.666	0.808747	Metformin	1	1
78.4757	247.454	1416.07	444.174	79.4425	397.988	2716.52	855.562	0.762704	Metformin	1	1
83.2477	192.24	1176.22	330.591	83.0966	301.692	2341.03	649.527	0.712306	Metformin	1	1
89.8121	203.937	1397.3	339.584	74.9717	243.15	2146.36	722.023	0.72854	Metformin	1	1
79.2496	302.385	1542.53	489.698	81.6534	405.254	2963.7	853.619	0.76509	Metformin	1	1
80.8037	241.271	1367.6	419.943	82.7618	361.21	2601.03	734.753	0.709026	Metformin	1	1
77.9086	211.64	1174.93	376.287	83.2961	352.653	2364.93	689.101	0.714258	Metformin	1	1
79.6401	311.206	1902.82	551.762	76.609	433.826	2925.36	1000.18	0.785572	Metformin	1	1
81.4035	233.037	1306	402.558	82.3752	360.929	2411.66	718.555	0.708007	Metformin	1	1
75.6618	349.171	1501.7	567.13	74.9714	558.029	3340.45	1197.32	0.850008	Metformin	1	1
77.1633	404.243	1770.07	624.048	73.0075	526.58	3186.21	1202.56	0.861503	Metformin	1	1
79.6391	230.46	1187.79	392.86	79.2794	369.729	2588.94	830.687	0.773252	Metformin	2	1
77.1197	241.607	1785.18	546.297	69.6978	342.113	3339.61	1210.85	0.734304	Metformin	2	1
77.2555	300.575	1543.56	524.623	76.4844	442.249	3157.06	1069.63	0.781963	Metformin	2	1
78.4012	398.668	1724.81	604.735	75.8216	443.463	3452.2	1140.54	0.827252	Metformin	2	1
79.3459	235.466	1315.33	420.645	80.3941	326.675	2423.4	741.982	0.723867	Metformin	2	1
79.7957	191.16	1148.13	359.098	81.2408	297.982	2573.21	732.692	0.71864	Metformin	2	1
79.1616	353.08	1876.27	584.352	71.3412	492.629	3299.8	1240.38	0.805797	Metformin	2	1
79.0882	208.829	1348.25	403.204	79.0447	318.058	2623.71	799.502	0.716186	Metformin	2	1
78.4931	240.946	1203.96	406.869	80.1079	367.711	2793.2	850.865	0.74609	Metformin	2	1
79.9389	242.167	1267.41	409.996	81.8948	346.898	2553.75	743.349	0.735199	Metformin	2	1
80.0075	178.939	1143.69	349.358	81.4981	276.836	2416.87	675.541	0.680994	Metformin	2	1
77.2831	314.336	1190.61	472.975	82.9415	434.367	2905.6	820.788	0.809017	Metformin	2	1
79.6013	264.4	1323.21	433.01	77.3202	398.2	2884.42	950.928	0.793885	Metformin	2	1
79.0808	271.423	1576.21	501.951	71.5722	428.018	3213.26	1190.52	0.795982	Metformin	2	1
77.8258	189.018	1153.68	375.976	78.9014	254.368	2551.75	755.267	0.658885	Metformin	2	1
79.8483	190.812	1161.11	354.699	82.8333	288.989	2397.28	647.39	0.680625	Metformin	2	1
78.6879	193.773	1182.6	381.524	82.3845	263.564	2233.07	617.334	0.601086	Metformin	2	1
80.5413	182.498	1120.82	350.217	81.9524	277.234	2227.23	628.891	0.647583	Metformin	2	1
76.9089	247.841	1304.49	454.865	78.0842	446.215	2930.39	983.964	0.773789	Metformin	2	1
77.67	238.218	1765.03	531.757	66.2182	351.565	2961.13	1225.11	0.750308	Metformin	2	1
81.4244	196.162	1344.74	371.591	74.5228	297.505	2875.69	960.29	0.73272	Metformin	2	1
78.0441	317.256	1618.49	533.3	70.3071	441.234	2997.84	1184.26	0.822896	Metformin	2	1
78.9646	277.656	1611.98	505.774	73.2751	391.213	3399.18	1150.05	0.803372	Metformin	2	1
75.6928	373.508	1933.5	657.002	52.4877	541.922	3259.35	1788.76	0.878408	Metformin	2	1
78.5419	325.7	1637.21	535.708	73.7779	438.779	3223.97	1148.15	0.791835	Metformin	2	1
46.6824	770.432	1956.32	1277.85	63.8133	425.115	2308.57	1093.74	0.604413	Metformin	2	1
78.3865	405.616	2020.36	671.754	66.0189	501.01	3158.06	1382.41	0.838238	Metformin	2	1
80.0812	292.431	1445.08	468.621	71.7413	438.576	2935.63	1120.99	0.819083	Metformin	2	1
79.8095	219.951	1416.56	421.67	40.3785	533.238	3118.71	2078.42	0.900893	Metformin	2	1
80.4631	307.106	1392.98	476.158	78.7775	433.574	3276.95	924.985	0.847675	Metformin	2	1
77.3789	268.309	1498.24	505.299	73.0897	406.944	2642.98	1009.5	0.744286	Metformin	2	1
76.3694	379.938	1490.81	561.527	78.3654	502.911	3115.84	1022.19	0.847662	Metformin	2	1
81.3191	191.902	1200.93	358.28	81.2117	286.084	2393.58	684.255	0.667252	Metformin	2	1
78.9747	227.61	1295.93	416.509	81.0492	430.443	3026.25	884.76	0.759743	Metformin	2	1
81.5476	261.426	1406.61	425.925	79.2172	403.54	2913.9	900.599	0.78531	Metformin	2	1
79.6265	215.394	1330.8	410.311	80.6345	301.626	2443.42	717.537	0.6899	Metformin	2	1
81.3301	194.51	1133.68	337.315	82.3406	311.042	2673.04	711.348	0.670981	Metformin	3	1
78.4961	282.19	1372.57	455.501	78.6115	447.143	3098.27	978.98	0.78078	Metformin	3	1
78.5941	271.576	1356.34	450.892	78.7817	389.794	2870.26	899.472	0.781693	Metformin	3	1
78.4427	198.511	1126.04	370.155	81.2678	284.788	2295.37	663.985	0.664069	Metformin	3	1
79.009	226.553	1329.57	420.523	74.6509	326.858	2395.12	850.829	0.688553	Metformin	3	1
78.9701	264.721	1299.92	431.871	81.6766	399.246	2563.29	790.602	0.787186	Metformin	3	1
77.6313	220.201	1352.21	436.63	78.1993	326.162	2471.81	799.328	0.678146	Metformin	3	1
78.6907	232.232	1471.29	460.139	75.1161	364.071	2862.65	970.093	0.742509	Metformin	3	1
77.2658	214.514	1261.09	409.506	79.4251	343.631	2772.37	836.928	0.755841	Metformin	3	1
77.3347	273.254	1160.87	427.254	82.4028	394.91	2828.43	806.789	0.7866	Metformin	3	1
80.1161	280.091	1659.51	519.431	79.8224	358.842	2514.92	792.559	0.708156	Metformin	3	1
77.7275	201.154	1149.67	374.504	78.2793	347.991	2804.28	872.865	0.703826	Metformin	3	1
79.2831	233.583	1342.6	428.841	74.1488	380.619	2482.39	909.772	0.709431	Metformin	3	1
79.4185	174.501	1070.87	336.673	85.024	284.136	2409.08	605.861	0.628701	Metformin	3	1
78.1567	249.392	1284.91	437.169	79.8845	374.244	2715.69	840.558	0.772248	Metformin	3	1
81.6358	213.374	1300.75	383.284	80.7382	386.359	2730.52	839.294	0.719893	Metformin	3	1
79.0008	307.941	1396.45	477.161	78.987	413.372	2909.38	918.913	0.775645	Metformin	3	1
83.8201	367.493	1843.68	538.107	81.4757	477.923	3449.21	989.368	0.822733	Metformin	3	1
81.6461	342.931	1608.41	513.801	76.1911	417.365	2848.03	978.186	0.807086	Metformin	3	1
76.4937	402.002	1733.36	634.944	67.9418	525.783	4791.9	1519.3	0.834962	Metformin	3	1
77.3294	230.621	1237.58	418.164	80.3879	334.733	2437.2	747.804	0.697118	Metformin	3	1
75.3217	436.368	2114.33	707.576	66.9087	541.222	3184.12	1376.13	0.851137	Metformin	3	1
76.2592	443.911	1871.51	685.333	64.1068	491.468	2908.19	1345.16	0.860581	Metformin	3	1
77.9277	257.877	1514.78	477.244	74.4114	477.593	3095.92	1124.31	0.746473	Metformin	3	1
77.8918	276.558	1368.36	475.295	77.7415	395.741	2725.52	896.611	0.690092	Metformin	3	1
79.0288	195.462	1165.02	364.91	79.2172	374.313	2527.6	801.27	0.722661	Metformin	3	1
79.3843	228.221	1298.3	410.061	79.9722	384.597	2598.03	822.307	0.69569	Metformin	3	1
73.7575	345.757	1711.76	648.98	77.9374	400.05	2696.97	890.509	0.732304	Metformin	3	1
78.9425	215.464	1158.97	377.737	79.7614	370.716	2711.7	828.657	0.696653	Metformin	3	1
81.6136	171.339	1100.92	321.786	83.6016	381.459	2865.3	766.2	0.679117	Metformin	3	1
99.9943	367.764	1084.81	332.111	78.3949	474.383	2447.04	903.641	0.836824	Metformin	3	1
79.4282	321.928	1557.62	521.223	79.6462	505.877	3109.34	1009.33	0.78776	Metformin	3	1
78.5823	326.018	1758.26	571.17	73.1277	443.544	3118.96	1126.61	0.77986	Metformin	3	1
76.9936	359.527	1888.23	617.311	67.7391	529.36	3735.28	1434.85	0.848471	Metformin	3	1
79.9922	276.123	1490.89	467.58	79.4095	440.526	3136.92	1000.77	0.750244	Metformin	3	1
77.5602	398.019	1537.04	582.404	79.3289	484.931	3025.44	993.464	0.853259	Metformin	3	1
78.256	229.275	986.292	357.656	85.7913	397.147	2900.25	711.38	0.784286	Metformin	3	1
73.5869	335.699	1788.05	639.818	63.0563	575.178	3238.37	1499.56	0.844484	Metformin	3	1
79.6265	366.791	1530.36	541.784	76.9602	454.34	2856.58	993.105	0.820885	Metformin	3	1
73.5743	405.321	1612.99	681.106	65.0065	418.047	2409.96	1110.64	0.817744	Metformin	3	1
77.7376	247.598	1298.88	437.421	82.5962	377.065	2533.08	742.489	0.745565	Metformin	3	1
77.3645	218.938	1255.8	407.197	78.7725	389.633	2717.09	864.854	0.760701	Metformin	3	1
76.6647	317.91	1631.27	566.989	72.4759	468.221	2958.63	1135.39	0.802081	Metformin	3	1
76.7125	403.948	1457.37	584.829	78.1625	449.056	3163.73	1026.66	0.852599	Metformin	3	1
78.0821	301.331	1278.58	458.627	79.4849	433.623	2852.17	917.299	0.821681	Metformin	3	1
80.1036	268.897	1281.3	435.905	82.5257	389.28	2620.74	773.466	0.769958	Metformin	3	1
82.4698	341.96	2082.99	584.136	70.9152	512.156	3791.55	1359.15	0.81589	Metformin	3	1
79.1889	228.699	1301.24	408.55	75.9218	369.748	2736.7	927.869	0.785466	Metformin	3	1
79.9374	283.937	1541.49	473.83	79.1504	399.741	3010.56	910.464	0.790803	Metformin	3	1
77.7865	186.414	1092.85	363.575	81.5733	297.451	2468.91	692.575	0.680994	Metformin	3	1
79.7768	288.608	1490.87	483.071	78.0504	402.62	2628.48	889.666	0.785481	Metformin	3	1
81.966	226.626	1348.04	397.508	79.6885	324.133	2513.22	771.713	0.746585	Metformin	3	1
80.9918	230.628	1359.22	410.084	75.4354	375.041	2825.54	957.318	0.780393	Metformin	3	1
82.0397	275.291	1322.77	436.419	83.5276	410.781	2731.01	784.215	0.808793	Metformin	3	1
77.6537	286.896	1461.24	510.455	77.1008	449.382	2921.07	1004.53	0.830813	Metformin	3	1
80.7657	279.556	1177.25	416.775	74.6706	428.832	2667.35	982.138	0.829745	Metformin	3	1
80.9346	365.026	1506.56	529.444	77.958	451.564	2925.8	986.201	0.838118	Metformin	3	1
78.3595	189.895	1101.24	365.155	82.1384	299.85	2480.86	691.142	0.687149	Metformin	3	1
81.3174	263.627	1206.79	413.336	86.258	375.298	2545.02	667.55	0.773323	Metformin	3	1
80.0086	218.728	1361.16	411.331	79.2019	373.295	2806.22	880.822	0.769949	Metformin	3	1
76.5769	364.254	1306.25	512.215	83.164	478.316	3003.55	881.026	0.85173	Metformin	3	1
80.6826	332.116	1286.51	469.512	81.8247	437.087	2835.76	866.498	0.849987	Metformin	3	1
75.0948	384.965	1590.29	567.956	69.3787	503.907	3699.81	1382.92	0.82617	Metformin	3	1
80.438	258.824	1490.99	457.224	78.9338	363.701	2866.91	896.713	0.77863	Metformin	3	1
82.034	351.067	1353.49	484.181	85.0006	448.827	2785.25	794.462	0.848078	Metformin	3	1
79.4619	346.206	1388.95	499.063	81.3278	440.766	2731.78	855.545	0.847785	Metformin	3	1
64.6976	322.299	1849.97	780.353	67.64	381.826	2474.81	1064.82	0.735647	Metformin	3	1
81.2798	347.822	1499.96	511.907	77.7782	457.522	2958.31	995.146	0.83225	Metformin	4	1
80.072	371.014	2123.09	614.407	75.9292	479.729	3115.27	1081.27	0.841762	Metformin	4	1
72.815	318.538	1549.16	604.052	75.4883	406.299	2633.24	926.322	0.646195	Metformin	4	1
74.973	221.277	1378.74	473.364	78.6059	325.509	2486.27	771.003	0.591134	Metformin	4	1
78.0942	300.394	1484.36	501.405	77.2673	488.785	3085.23	1054.04	0.725164	Metformin	4	1
77.9569	310.968	1578.91	533.687	78.7475	420.353	2822.23	903.829	0.705524	Metformin	4	1
77.766	277.774	1651.58	521.029	76.9398	456.44	3090.17	1039.33	0.745337	Metformin	4	1
74.1267	247.114	1451.29	516.849	74.5713	337.93	2439.64	864.462	0.645924	Metformin	4	1
75.563	326.784	1420.4	506.295	75.6981	487.862	3036.7	1068.47	0.848589	Metformin	4	1
65.3009	263.029	1570.68	634.69	51.7005	429.44	2601.04	1472.48	0.712984	Metformin	4	1
74.2183	260.274	1412.55	520.83	76.3638	349.852	2647.25	880.797	0.651457	Metformin	4	1
72.061	256.109	1560.32	570.154	71.092	369.854	2648.53	1021.83	0.688357	Metformin	4	1
80.1439	224.099	1391.07	427.119	78.4322	359.055	2453.99	795.148	0.652651	Metformin	4	1
75.5487	270.125	1558.06	534.815	74.6621	357.177	2655.24	924.148	0.649996	Metformin	4	1
74.906	263.777	1443.63	522.537	76.507	349.546	2391.72	823.26	0.644387	Metformin	4	1
76.8487	269.085	1364.05	480.773	76.3404	392.819	2774.06	942.032	0.706088	Metformin	4	1
73.3656	365.268	1797.1	696.091	71.6577	463.722	2902.21	1133.81	0.716971	Metformin	4	1
77.3209	302.837	1578.04	541.083	79.3373	443.475	2755.37	909.472	0.754533	Metformin	4	1
77.4895	256.973	1543.11	493.204	79.2101	388.863	2677.16	841.936	0.681895	Metformin	4	1
74.9328	243.608	1439.56	500.308	75.6129	387.326	2641.63	923.798	0.677789	Metformin	4	1
76.5068	233.195	1392.74	459.324	65.7605	342.565	3022.92	1255.08	0.729376	Metformin	4	1
74.5231	232.829	1457.38	507.279	73.1142	346.233	2503.61	924.067	0.627062	Metformin	4	1
73.8677	246.515	1440.19	512.848	75.3305	359.809	2589.22	894.458	0.635678	Metformin	4	1
72.4167	256.541	1433.22	542.159	74.6649	379.335	2564.22	925.014	0.704115	Metformin	4	1
78.334	256.948	1341.76	456.519	76.8917	375.425	2953.12	966.97	0.759531	Metformin	4	1
79.2407	405.442	1572.86	564.985	79.0085	479.032	3065.48	1003.9	0.854428	Metformin	4	1
70.2583	355.042	1791.23	730.329	68.3884	398.358	2591.15	1088.17	0.718942	Metformin	4	1
74.0951	249.721	1444.07	512.367	75.0266	380.437	2670.58	938.205	0.678017	Metformin	4	1
76.7451	276.267	1422.21	502.55	79.0506	384.369	2570.79	826.305	0.678499	Metformin	4	1
76.1225	245.716	1492.46	492.394	76.0778	360.334	2608.65	885.198	0.674615	Metformin	4	1
75.5158	275.837	1472.84	526.699	79.6858	379.142	2550.52	805.673	0.676257	Metformin	4	1
77.3452	265.375	1506.59	504.466	77.1812	380.622	2700.48	893.483	0.680129	Metformin	4	1
76.6377	226.296	1230.91	421.757	80.7132	344.334	2497.68	749.232	0.644224	Metformin	4	1
67.4917	291.493	1671.31	660.994	65.9321	391.93	2482.32	1095.4	0.668936	Metformin	4	1
76.8403	254.53	1345.81	464.362	81.1879	379.583	2578.61	785.49	0.708672	Metformin	4	1
66.1171	248.904	1603.97	643.013	60.7511	348.176	2618.6	1236.52	0.677751	Metformin	4	1
80.0459	298.989	1794.87	556.628	78.3246	438.963	2970.55	980.418	0.790956	Metformin	4	1
78.4731	390.702	1934.92	672.185	75.5388	456.178	3149.45	1097.46	0.808195	Metformin	4	1
78.7081	291.798	1471.3	492.584	80.4031	420.96	2811.02	879.363	0.773239	Metformin	4	1
76.8159	270.172	1588.15	530.715	60.9082	391.235	2817.82	1315.44	0.835182	Metformin	4	1
81.2511	242.897	1434.35	423.69	77.737	389.931	2983.85	938.002	0.7807	Metformin	4	1
76.3907	248.913	1428.26	489.694	78.6001	344.751	2416.99	782.78	0.68165	Metformin	4	1
77.0388	261.467	1546.85	507.039	75.1408	372.575	2813.3	963.041	0.656476	Metformin	4	1
73.6943	221.727	1262.14	460.387	78.1622	333.176	2441.28	787.519	0.640149	Metformin	4	1
74.1071	386.285	3030.03	815.729	66.5479	476.294	2908.86	1283.12	0.843053	Metformin	4	1
81.4768	401.251	1536.11	562.071	82.0479	450.313	2882.7	875.881	0.844183	Metformin	4	1
80.673	308.934	1199.89	446.474	85.7452	407.229	2590.28	714.405	0.782579	Metformin	4	1
78.1989	281.592	1472.73	490.719	74.8765	424.524	2909.67	1026.16	0.810663	Metformin	4	1
79.5315	323.803	1581.7	513.48	78.2335	457.37	3081.92	1006.46	0.82091	Metformin	4	1
80.0461	285.18	1285.43	441.171	85.0814	404.685	2626.55	727.157	0.766683	Metformin	4	1
84.3839	324.723	1504.67	456.328	59.9897	381.038	2830.31	1361.85	0.869469	Metformin	4	1
84.9551	321.955	1568.2	495.374	83.987	423.148	2643.53	770.47	0.803956	Metformin	4	1
79.06	327.018	1591.26	538.625	76.4252	417.615	2746.37	964.253	0.809862	Metformin	4	1
78.6426	302.163	1666.22	530.303	64.679	414.889	2929.82	1293.35	0.83866	Metformin	4	1
79.3155	374.477	1662.65	556.182	75.4108	473.955	2834.8	1032.71	0.832331	Metformin	4	1
81.0344	294.925	1238.07	442.049	85.004	434.327	2680.53	762.683	0.810917	Metformin	4	1
75.0443	267.79	1448.23	516.467	76.0882	405.739	2833.72	971.884	0.752734	Metformin	4	1
72.832	246.198	1424.54	511.159	73.2544	349.975	2643.96	957.112	0.6742	Metformin	4	1
75.894	309.227	1439.07	521.112	78.8367	414.147	2790.6	907.462	0.780433	Metformin	4	1
77.6036	317.861	1596.01	542.868	76.2344	410.683	2869.25	969.049	0.757514	Metformin	4	1
78.2627	277.587	1643.76	483.536	66.6217	437.041	3044.03	1294.04	0.797798	Metformin	4	1
78.0162	267.983	1499.51	491.723	77.1511	390.56	2697.72	896.294	0.640917	Metformin	4	1
79.0275	268.144	1416.19	468.946	81.0661	416.524	2795.28	855.884	0.709783	Metformin	4	1
74.6486	251.653	1300.37	475.333	77.9699	358.642	2548.52	834.833	0.661647	Metformin	4	1
76.3806	268.66	1546.44	537.027	76.4524	355.31	2488.7	849.277	0.676317	Metformin	4	1
84.3885	149.479	1352.92	323.228	79.4635	285.211	2253.77	701.429	0.50427	Control	1	2	197
84.6803	119.773	1123.77	263.596	83.2092	244.384	2155.71	569.377	0.4447	Control	1	2
81.2127	134.842	1219.36	327.899	77.8323	247.792	2161.88	680.974	0.497058	Control	1	2
82.9247	162.191	1616.62	383.736	70.5864	436.312	2812.66	1114.99	0.572568	Control	1	2
84.1603	115.564	1107.44	263.529	83.0427	237.846	2017.03	536.82	0.425315	Control	1	2
84.3681	127.539	1236.94	286.624	80.739	263.33	2244.28	644.83	0.46344	Control	1	2
81.5142	123.194	1089.85	292.44	82.0715	239.221	1873.17	533.228	0.402527	Control	1	2
81.543	112.755	1147.59	294.772	79.4727	261.104	2229.87	663.657	0.415943	Control	1	2
81.4317	162.779	1485.48	388.658	75.7255	362.14	2675.04	916.619	0.568033	Control	1	2
81.0734	114.266	1296.52	325.94	74.1816	327.165	2444.45	868.132	0.492196	Control	1	2
83.8988	129.285	1289.5	297.918	77.8527	302.245	2487.23	791.722	0.551098	Control	1	2
86.3235	112.004	1150.15	245.637	83.0574	224.217	2356.81	584.981	0.465009	Control	1	2
83.7436	147.662	1297.25	315.886	80.1037	298.085	2348.33	710.763	0.517672	Control	1	2
83.7062	107.342	1048.34	250.222	81.8802	272.756	2212.7	620.475	0.462215	Control	1	2
86.4179	99.8964	953.29	208.234	85.2052	228.806	1934.07	481.151	0.44516	Control	1	2
85.8172	124.504	1294.27	279.617	79.2141	275.742	2293.78	697.299	0.513555	Control	1	2
81.2469	168.376	1540.59	402.32	75.8886	410.986	2783.75	963.006	0.569738	Control	1	2
85.3871	132.12	1112.18	261.969	83.4291	270.954	2185.13	567.678	0.46647	Control	1	2
81.8855	128.58	1239.62	314.207	79.4635	286.318	2332.35	689.681	0.465472	Control	1	2
83.506	184.401	1631.92	391.417	76.3026	343.728	2583.31	860.275	0.605213	Control	1	2
82.5183	173.935	1409.61	364.217	79.765	366.683	2515.56	796.981	0.58739	Control	1	2
81.8927	158.02	1386.4	359.971	78.1604	358.149	2605.79	838.145	0.572037	Control	1	2
79.8806	197.23	1610.23	461.743	72.7462	447.323	2721.35	1042.65	0.589147	Control	1	2
86.04	102.046	1034.49	227.285	84.9556	227.453	1983	485.364	0.416859	Control	1	2
77.984	166.814	1795.66	507.445	65.2824	597.294	2977.48	1393.79	0.599322	Control	1	2
77.1274	333.731	2165.03	707.83	68.4709	592.989	3085.18	1353.25	0.631956	Control	1	2
77.4027	210.422	2014.51	587.238	69.7271	483.999	3041.19	1228.63	0.594368	Control	1	2
80.3042	187.748	1577.74	437.014	73.1072	406.457	2640.75	1000.35	0.594339	Control	1	2
84.3386	160.443	1327.02	331.615	80.8291	326.409	2510.22	744.028	0.582623	Control	1	2
81.6801	130.824	1182.32	315.789	79.4073	246.488	1897.5	596.837	0.489792	Control	1	2
82.6616	128.136	1198.75	305.117	79.4598	236.931	1948.38	600.098	0.431586	Control	1	2
85.145	105.222	1033.59	235.63	81.2628	257.163	2199.67	628.209	0.484945	Control	1	2
82.909	133.749	1191.06	297.841	80.7601	289.158	2276.76	676.009	0.530364	Control	1	2
84.6962	113.771	1105.12	258.999	84.5671	204.484	1752.69	450.941	0.412475	Control	1	2
84.8435	116.833	1151.09	267.237	81.7264	219.146	1951.92	556.952	0.408877	Control	1	2
85.1559	108.922	1067.32	246.729	82.6891	248.712	2176.98	583.977	0.495084	Control	1	2
79.6938	148.408	1338.73	368.077	74.4472	332.847	2387.27	851.888	0.515111	Control	1	2
82.3244	123.293	1125.52	285.476	80.0863	266.51	2174.1	647.126	0.484179	Control	1	2
82.8806	132.636	1120.4	286.375	80.0897	298.883	2359.69	706.936	0.540109	Control	1	2
81.8815	137.736	1161.61	310.44	81.28	279.162	2217.7	651.073	0.512078	Control	1	2
82.2509	153.85	1253.17	324.705	80.2858	333.356	2607.14	778.185	0.56969	Control	1	2
84.4823	122.652	1116.11	270.575	84.0872	198.622	1903.98	476.193	0.434157	Control	1	2
82.7159	131.479	1228.28	311.622	79.8248	260.881	2164.93	655.679	0.465677	Control	1	2
81.061	110.601	1231.97	302.062	72.5873	234.338	2244.77	783.091	0.509017	Control	1	2
84.1242	126.869	1122.68	274.623	84.5844	228.813	1943.94	501.051	0.449487	Control	1	2
82.6569	137.39	1264.62	321.215	77.4917	286.272	2378.28	753.773	0.543886	Control	1	2
83.1099	133.715	1244.28	311.382	79.707	286.348	2391.75	717.694	0.568342	Control	1	2
82.1823	206.446	1482.04	410.119	81.1032	349.126	2502.97	759.839	0.612943	Control	1	2
80.6475	192.076	1402.66	398.04	78.0343	359.385	2537.3	829.203	0.613451	Control	1	2
81.686	124.286	1108.36	288.03	79.5094	309.078	2426.23	747.884	0.554714	Control	1	2
81.5509	139.903	1199.48	316.105	77.6554	319.784	2544.73	812.809	0.565618	Control	1	2
80.6326	203.02	1242.27	373.677	83.5975	378.855	2544.86	724.977	0.623459	Control	1	2
82.9409	126.131	1146.32	287.273	82.1554	243.864	2131.34	585.268	0.482035	Control	1	2
83.5695	124.087	1152.67	290.02	82.1	221.562	1906.48	541.66	0.456779	Control	1	2
80.9734	127.931	1258.94	328.01	75.0453	270.245	2263.38	765.52	0.456352	Control	2	2
80.5859	128.776	1155.42	313.274	79.7622	260.48	2143.27	640.125	0.451976	Control	2	2
76.8895	149.913	1128.83	349.497	78.5361	348.711	2521.62	809.568	0.565506	Control	2	2
81.2834	136.876	1352.46	345.598	75.0437	311.185	2442.11	840.613	0.508618	Control	2	2
80.3845	125.33	1162.61	310.44	77.934	278.323	2317.3	731.078	0.50154	Control	2	2
81.3183	128.366	1194.67	311.37	77.4433	285.993	2362.12	752.6	0.485301	Control	2	2
81.8445	110.042	1134.79	281.258	77.1024	260.779	2251.54	713.984	0.456644	Control	2	2
81.3313	122.612	1254.85	319.176	75.772	288.287	2316.99	785.457	0.477916	Control	2	2
83.4386	112.331	1158.56	272.86	78.7475	259.026	2292.36	691.538	0.48559	Control	2	2
80.7887	125.769	1246.96	326.382	76.0616	291.922	2433.67	800.425	0.497763	Control	2	2
78.3228	147.495	1365.2	387.943	74.7361	343.758	2457.64	870.712	0.514308	Control	2	2
77.9098	146.679	1330.62	387.772	74.1276	329.379	2410.08	859.729	0.525144	Control	2	2
78.3778	197.719	1618.47	472.033	71.8623	387.71	2502.17	967.698	0.561129	Control	2	2
80.9002	95.1195	1159.23	287.251	70.943	265.433	2283.47	848.541	0.46909	Control	2	2
81.6643	131.317	1213.29	314.851	78.0942	248.506	2111.96	667.288	0.453626	Control	2	2
81.2438	140.223	1325.41	343.292	74.6922	292.695	2421.62	828.149	0.531465	Control	2	2
78.9015	134.991	1232.33	348.868	77.2044	274.837	2142.62	698.859	0.434544	Control	2	2
80.9232	149.972	1348.89	361.527	75.926	313.342	2335.82	807.873	0.536724	Control	2	2
81.097	146.153	1335.31	353.335	76.7494	313.461	2306.75	769.473	0.489096	Control	2	2
81.3378	131.908	1218.47	321.701	78.8757	306.869	2303.84	718.55	0.460736	Control	2	2
82.2066	214.242	1784.7	443.911	72.2875	399.45	2787.54	1051	0.606844	Control	2	2
81.7919	124.016	1232.17	309.064	76.963	290.863	2429.18	782.721	0.517567	Control	2	2
81.6657	124.689	1277.92	321.773	76.8843	283.311	2350.76	759.818	0.469491	Control	2	2
80.781	144.907	1310.14	349.989	76.1974	308.716	2354.41	795.698	0.483888	Control	2	2
83.3549	109.252	1091.41	263.967	80.007	240.929	2207.73	632.854	0.48885	Control	2	2
81.6074	121.148	1258.32	315.744	76.2175	279.299	2369.62	773.211	0.464979	Control	2	2
80.5294	137.675	1321.15	352.136	75.7587	314.846	2477.23	831.877	0.499443	Control	2	2
78.766	156.132	1436.31	402.872	74.0377	329.118	2516.28	887.621	0.514464	Control	2	2
78.7264	159.737	1407.26	401.057	74.0757	329.503	2388.45	853.788	0.537665	Control	2	2
81.3165	134.543	1316.98	343.271	76.8169	291.708	2385.75	772.689	0.489299	Control	2	2
78.1231	149.157	1460.31	420.298	72.6334	344.939	2420.55	894.675	0.522517	Control	2	2
79.9495	123.209	1131.7	309.649	78.896	263.994	2114.4	651.816	0.461373	Control	2	2
77.0678	139.843	1144.21	346.227	78.8963	341.576	2526.94	801.519	0.569664	Control	2	2
81.0183	130.125	1220.54	318.909	77.9906	265.666	2379.93	736.157	0.500501	Control	2	2
80.8327	136.344	1278.17	336.774	77.1868	282.87	2365.45	754.62	0.489541	Control	2	2
85.0435	100.254	1285.62	269.106	76.4204	264.444	2704	841.205	0.510633	Control	3	2
82.6258	126.549	1242.64	310.451	80.1653	226.376	2035.57	590.7	0.431643	Control	3	2
84.4566	113.151	1063.12	254.856	82.1482	232.512	2061.42	567.618	0.462281	Control	3	2
84.2981	104.855	1025.89	238.181	80.8425	261.985	2360.31	673.709	0.499457	Control	3	2
83.724	122.107	1077.24	268.157	83.2423	258.634	2104.71	568.804	0.491446	Control	3	2
76.5698	167.405	1463.78	451.545	73.5739	287.166	2257.63	803.857	0.479494	Control	3	2
83.8824	109.223	1070.57	252.284	80.3349	244.905	2274.88	651.722	0.489049	Control	3	2
83.9407	127.05	1175.83	280.738	81.2631	285.334	2409.85	681.112	0.530078	Control	3	2
81.1346	158.468	1486.52	397.252	78.7457	369.893	3058.43	914.904	0.566025	Control	3	2
83.2742	116.148	1048.72	256.438	81.5736	260.932	2132.25	608.344	0.503355	Control	3	2
83.2124	110.232	1039.91	258.084	81.1866	288.215	2417.41	697.535	0.521773	Control	3	2
82.2137	118.253	1279.78	311.927	75.1816	262.586	2343.39	779.215	0.475586	Control	3	2
82.6158	134.869	1299.08	327.472	77.6614	297.936	2368.5	764.151	0.482671	Control	3	2
83.8222	118.557	1142.09	275.086	82.0026	246.421	2196.49	601.023	0.484283	Control	3	2
84.9155	120.351	1168.42	274.1	81.4352	270.065	2265.8	647.395	0.517012	Control	3	2
83.0192	140.011	1108.62	287.609	81.7002	286.003	2294.53	660.929	0.551811	Control	3	2
82.7546	154.315	1273.17	321.336	80.7792	320.316	2579.9	744.059	0.56045	Control	3	2
83.4168	115.77	1040.07	258.219	82.6941	264.903	2281.43	622.88	0.530388	Control	3	2
81.9646	109.658	996.636	251.026	78.3865	278.006	2512.55	761.098	0.556367	Control	3	2
84.0413	104.589	1019.31	242.919	82.3754	229.199	2138.98	580.156	0.498783	Control	3	2
80.4975	113.898	983.413	264.775	79.6819	289.476	2475.34	737.434	0.517178	Control	3	2
82.0541	125.012	969.239	260.778	84.975	310.491	2198.97	593.816	0.543259	Control	3	2
81.3261	257.825	1920.24	530.223	79.1787	601.059	3404.04	1171.47	0.557768	Control	3	2
81.8026	208.383	1697.09	447.93	75.3634	537.733	3103.61	1143.96	0.585653	Control	3	2
80.3376	262.18	1595.12	455.393	80.4226	409.112	2837.93	811.817	0.659933	Control	3	2
79.4141	239.644	1666.81	501.584	78.7555	472.189	3011.79	993.251	0.63108	Control	3	2
81.4262	198.027	1280.11	366.533	82.8626	376.364	2514.78	737.599	0.625994	Control	3	2
79.2405	193.012	1923.04	527.753	64.9916	545.59	3203.17	1422.34	0.608216	Control	3	2
80.7293	180.424	1667.05	446.456	71.1509	476.953	2926.99	1175.22	0.622201	Control	3	2
80.3272	210.83	1789.85	497.257	71.1466	507.771	3109.4	1216.33	0.609938	Control	3	2
80.022	219.142	1776.02	502.515	73.7818	420.921	2760.27	1022.31	0.590808	Control	3	2
86.2858	90.9325	1231.94	238.253	72.5307	349.043	2509.3	942.422	0.527648	Control	3	2
79.4411	257.611	1839.38	545.8	75.2079	420.666	2658.5	967.335	0.654313	Control	3	2
78.6719	232.05	1863.27	548.657	70.778	461.335	2791.99	1129.54	0.63036	Control	3	2
82.6145	122.073	1170.99	290.64	79.8019	307.533	2385.2	719.517	0.461226	Control	4	2
82.6922	100.424	1013.26	250.798	79.1878	263.856	2191.17	663.534	0.448401	Control	4	2
79.5228	137.956	1358.31	371.489	72.7544	301.791	2350.02	859.169	0.475542	Control	4	2
81.2897	116.409	1113.37	291.942	78.706	281.584	2174.4	682.3	0.443028	Control	4	2
83.8313	112.578	1136.39	273.721	81.2075	251.407	1987.33	591.538	0.445892	Control	4	2
79.6693	125.638	1241.95	334.026	75.3691	295.447	2394.32	812.564	0.482143	Control	4	2
81.0099	117.336	1153.29	300.871	76.4886	285.028	2258.92	749.743	0.443768	Control	4	2
79.1474	148.401	1281.94	373.883	74.0731	236.518	1959.26	687.521	0.425574	Control	4	2
67.5077	270.978	1675.99	700.671	65.2621	339.246	2187.04	973.702	0.488346	Control	4	2
81.5475	117.89	1123.11	292.726	80.0849	267.214	2019.61	619.19	0.42153	Control	4	2
80.4126	127.192	1204.51	327.811	77.3925	279.243	2020.9	681.632	0.441293	Control	4	2
80.1034	167.571	1601.75	425.795	66.376	364.28	2667.78	1135.42	0.560297	Control	4	2
81.0129	151.025	1367.78	368.895	74.4617	295.956	2531.48	859.098	0.544461	Control	4	2
81.7349	158.179	1436.81	373.132	74.9735	338.431	2583.51	887.487	0.504483	Control	4	2
82.1075	115.977	1242.14	305.079	75.5115	276.968	2407.61	798.543	0.482391	Control	4	2
79.4227	133.708	1299.48	355.512	74.9885	298.794	2464.36	835.143	0.487799	Control	4	2
78.6082	154.782	1651.64	451.673	71.9542	363.399	2827.4	1056.01	0.546037	Control	4	2
79.7461	165.73	1547.13	426.622	73.647	346.238	2753.21	971.692	0.588851	Control	4	2
80.8981	119.685	1040.94	281.84	79.5027	290.414	2132.94	675.969	0.487156	Control	4	2
80.5677	144.038	1301.2	358.224	74.9095	276.611	2253.85	795.92	0.494678	Control	4	2
80.4347	119.152	1147.36	309.814	77.1136	285.404	2211.37	735.415	0.447463	Control	4	2
82.0762	114.606	1166.03	294.691	79.2952	265.691	2152.45	665.92	0.429944	Control	4	2
78.833	209.111	1677.49	489.63	73.2808	403.478	2766.61	1031.46	0.582782	Control	4	2
80.5793	183.309	1606.79	439.616	73.9613	378.823	2748.22	995.172	0.577129	Control	4	2
84.0758	120.591	1343.27	306.016	75.1944	257.764	2427.88	795.315	0.480866	Control	4	2
82.4842	144.053	1385.42	339.58	74.2336	354.75	2551.36	915.034	0.516721	Control	4	2
64.0159	185.32	1517.4	607.672	59.9749	347.006	2112.05	1051.81	0.498146	Control	4	2
81.0821	135.145	1279.6	341.029	76.903	282.306	2265.78	742.114	0.440378	Control	4	2
82.9975	126.239	1360.09	323.219	76.5619	300.245	2437.06	801.721	0.467259	Control	4	2
82.3364	123.705	1281.09	316.291	75.4645	309.523	2501.4	843.671	0.46118	Control	4	2
83.1872	109.93	1130.69	274.819	79.5057	266.503	2197.68	666.561	0.45422	Control	4	2
79.1824	138.894	1331.16	371.502	72.7342	291.117	2358.53	856.046	0.472667	Control	4	2
75.6745	148.115	1332.53	409.316	74.7697	336.081	2452.54	862.394	0.507189	Control	4	2
80.6712	126.111	1192.07	320.417	80.0556	277.771	2180.09	657.564	0.450563	Control	4	2
80.635	118.89	1161.71	310.863	77.7452	289.266	2133.6	709.373	0.463664	Control	4	2
81.1103	172.242	1581.6	420.274	74.3809	467.839	2961.54	1091.75	0.573716	Control	5	2
82.4028	155.063	1422.07	359.695	74.7929	414.568	2755.81	997.899	0.610706	Control	5	2
87.2638	100.869	1002.79	209.211	86.874	202.579	1768.08	404.237	0.418469	Control	5	2
85.9946	131.701	1154	268.288	84.8285	212.906	1812.63	461.469	0.456684	Control	5	2
86.1713	89.7952	941.555	199.615	85.3816	229.265	2065.06	466.668	0.401463	Control	5	2
83.2631	112.77	1136.71	275.252	82.8625	276.338	2243.92	601.247	0.407957	Control	5	2
83.4256	166.66	1450.71	359.353	75.488	357.548	2660.91	912.313	0.57381	Control	5	2
83.4369	180.447	1889.71	430.331	71.6397	527.759	3280.56	1244.78	0.582936	Control	5	2
85.6049	117.11	1135.02	255.499	83.6572	243.954	1992.45	532.024	0.452795	Control	5	2
81.6241	178.157	1467.19	391.057	78.2519	376.443	2595.27	849.072	0.598613	Control	5	2
81.5168	164.901	1273.8	333.745	81.6561	349.636	2467.17	733.88	0.600309	Control	5	2
83.0135	106.5	1083.56	264.704	82.7122	229.045	1820.25	504.995	0.38457	Control	5	2
81.7565	176.535	1381.57	373.236	79.6406	350.356	2417.37	762.994	0.591667	Control	5	2
87.9501	81.2414	885.186	174.37	86.8383	181.751	1700.35	379.727	0.367086	Control	5	2
83.7074	106.908	1018.06	246.196	83.6002	244.758	2081.94	542.342	0.446408	Control	5	2
84.2266	126.702	1196.27	286.036	83.5449	253.777	2094.42	556.321	0.436008	Control	5	2
86.0064	94.0424	948.155	208.876	86.5579	222.977	1889.16	444.203	0.433716	Control	5	2
84.9238	103.451	1088.09	243.386	82.9437	239.219	2195.73	564.974	0.456364	Control	5	2
83.9334	98.8794	1060.65	243.723	81.8578	255.568	2377.61	641.547	0.484025	Control	5	2
84.8389	99.8426	979.732	226.094	84.3951	225.747	1931.84	491.047	0.412791	Control	5	2
85.2936	111.011	1069.44	245.242	82.6529	224.594	2043.85	552.741	0.457208	Control	5	2
84.0371	101.598	1005.17	238.626	81.1731	237.999	2175.46	617.233	0.485256	Control	5	2
81.3341	140.912	1076.68	297.539	81.6851	334.2	2319.6	697.828	0.578112	Control	5	2
86.7396	109.218	1135.18	240.379	84.3597	212.158	2007.77	494.462	0.428917	Control	5	2
84.091	178.152	1351.04	335.042	79.5702	329.998	2220.91	702.06	0.605968	Control	5	2
80.0845	161.36	1275.01	361.772	79.3368	328.318	2373.84	746.523	0.552025	Control	5	2
82.9819	105.402	1060.26	257.343	81.0004	251.403	2136.24	611.127	0.478616	Control	5	2
81.9594	131.079	1086.44	287.355	82.5325	279.371	2226.59	622.552	0.53592	Control	5	2
80.0127	129.07	1026.57	291.269	83.3614	335.436	2374.71	673.081	0.60093	Control	5	2
82.0309	146.897	1205.82	313.768	80.4293	307.947	2423.65	719.04	0.573559	Control	5	2
83.065	125.751	1081.25	274.291	81.5943	260.31	2113.49	610.7	0.526939	Control	5	2
82.85	104.454	1049.44	252.902	80.9147	263.892	2315.05	652.482	0.550044	Control	5	2
80.4038	195.178	1623.61	443.556	72.481	438.991	3136.19	1150.47	0.638257	Control	5	2
82.4766	136.497	1595.46	371.755	70.6455	380.58	3119.84	1164.28	0.619002	Control	5	2
81.3447	141.001	1088.63	299.767	80.4434	324.35	2458.53	745.234	0.596586	Control	5	2
82.9118	106.901	882.629	226.903	82.7548	332.402	2443.45	695.069	0.570181	Control	5	2
82.1046	133.887	1249.81	322.494	78.4293	315.895	2438.94	771.702	0.588611	Control	5	2
83.8827	109.203	917.622	229.101	84.7675	259.359	2067.98	540.917	0.502255	Control	5	2
80.1604	178.234	1475.38	410.028	75.3188	407.191	2735.99	972.511	0.598156	Control	5	2
83.8643	143.149	1356.56	322.788	74.6528	451.908	2909.86	1055.68	0.589462	Metformin	1	2	229
81.8294	150.282	1109.14	309.709	83.1641	318.494	2394.86	661.607	0.548314	Metformin	1	2
80.4585	201.181	1342.73	392.821	78.4285	415.817	2847.55	922.565	0.599966	Metformin	1	2
80.3685	235.809	1442.9	440.18	76.4625	393.744	2747.61	947.123	0.654628	Metformin	1	2
81.6964	165.732	1124.63	318.452	83.5309	349.199	2538.92	704.389	0.610147	Metformin	1	2
82.2853	175.406	1264.69	349.459	80.1099	339.234	2548.33	777.473	0.612181	Metformin	1	2
83.067	186.204	1533.13	387.581	75.5366	372.89	2887.02	973.899	0.655317	Metformin	1	2
82.0403	140.395	1063.41	289.166	84.7796	316.682	2326.49	616.342	0.555946	Metformin	1	2
82.6363	183.846	1331.74	356.85	78.4251	368.128	2709.77	860.147	0.611714	Metformin	1	2
82.9287	182.486	1411.74	369.722	78.3194	401.548	3070.99	968.859	0.636629	Metformin	1	2
84.6118	140.191	1472.39	325.321	76.9044	461.556	3083.99	1038.99	0.602594	Metformin	1	2
82.5539	160.457	1104.61	311.332	83.2874	309.486	2267.45	631.788	0.543324	Metformin	1	2
66.4629	238.683	1554.06	630.603	68.9486	357.623	2257.67	948.614	0.507657	Metformin	1	2
82.6357	156.665	1296.11	335.401	80.763	315.598	2357.92	705.972	0.534573	Metformin	1	2
81.3582	203.191	1295.12	382.603	80.9175	364.893	2714.63	805.786	0.605167	Metformin	1	2
82.0861	130.835	1212.59	315.754	77.4141	310.642	2602.37	806.92	0.537253	Metformin	1	2
78.9517	217.296	1696.03	466.867	71.3357	475.539	2870.26	1161.03	0.661825	Metformin	1	2
85.2515	88.1154	963.813	183.665	84.2968	247.328	2157.17	557.442	0.490982	Metformin	1	2
81.5607	149.099	1102.37	305.14	80.8346	319.659	2502.45	729.66	0.568449	Metformin	1	2
83.0555	125.362	1056	271.123	81.7064	289.393	2413.95	677.469	0.534029	Metformin	1	2
80.9598	172.3	1196.29	336.459	80.5547	340.615	2563.46	776.277	0.595807	Metformin	1	2
83.0284	109.871	1115.46	269.249	77.9263	273.925	2579.64	784.517	0.474464	Metformin	1	2
82.2	132.729	1202.99	304.484	80.1547	301.885	2611.79	749.478	0.524177	Metformin	1	2
82.2384	162.418	1211.96	324.435	80.1216	329.852	2517.75	762.936	0.595894	Metformin	1	2
84.0598	105.571	1060.91	248.184	79.4833	261.411	2515.76	739.884	0.496216	Metformin	1	2
82.2149	121.857	1127.57	283.638	76.7421	295.341	2720.28	854.369	0.535519	Metformin	1	2
82.0686	151.329	1194.01	318.886	81.1796	324.477	2545.91	738.537	0.56414	Metformin	1	2
82.8928	131.698	1118.73	285.824	81.2415	286.961	2408.33	685.779	0.557841	Metformin	1	2
78.2556	167.415	1298.71	387.159	77.088	325.314	2475.65	812.341	0.607215	Metformin	1	2
83.28	151.576	1090.05	294.535	84.1911	301.924	2159.48	589.691	0.519907	Metformin	1	2
81.1491	148.143	1593.19	403.962	72.7803	415.581	2891.3	1075.97	0.621086	Metformin	1	2
74.866	254.103	1785.38	601.999	69.4211	382.678	2926.83	1141.36	0.593793	Metformin	1	2
82.1353	183.741	1393.35	378.217	77.2593	388.376	2848.52	934.856	0.625913	Metformin	1	2
78.7901	147.878	1246.44	366.452	77.6362	284.622	2205.34	711.327	0.460717	Metformin	1	2
82.8665	277.892	1507.77	441.982	81.481	426.364	2658.21	831.103	0.669189	Metformin	1	2
85.0729	130.164	1012.64	247.372	86.4352	261.366	2329.3	535.512	0.495529	Metformin	1	2
82.2963	123.85	1030.39	271.08	81.9732	295.94	2353.33	659.12	0.484901	Metformin	1	2
83.5912	155.597	1199.7	312.269	84.4727	291.689	2105.18	567.823	0.447898	Metformin	1	2
78.5641	266.678	1481.73	485.357	77.4794	433.465	2722.25	940.37	0.677609	Metformin	1	2
80.3787	215.073	1443.9	417.849	75.6711	450.158	2726.81	990.057	0.664254	Metformin	1	2
84.1458	112.434	990.688	248.007	86.2451	195.391	1552.13	381.578	0.382479	Metformin	1	2
80.8799	207.483	1547.95	422.709	76.9452	407.146	2949.78	964.107	0.629191	Metformin	1	2
78.9616	150.427	1131.13	336.071	77.8268	369.362	2772.25	898.088	0.615456	Metformin	1	2
81.9261	109.624	987.495	257.019	81.9383	269.043	2254.15	625.926	0.524389	Metformin	1	2
81.7091	199.234	1604.74	429.399	75.9911	434.023	3089.96	1040.52	0.619778	Metformin	1	2
79.3734	191.977	1946.6	533.691	71.8319	463.883	3096.74	1185.55	0.630092	Metformin	1	2
80.4224	132.975	1119.88	310.66	79.3947	272.556	2412.57	710.594	0.463303	Metformin	1	2
80.9081	185.443	1422.26	390.754	78.5975	408.186	3037.19	931.961	0.64333	Metformin	1	2
86.1246	114.803	1031.39	231.433	85.423	250.487	2198.3	522.164	0.52032	Metformin	1	2
82.3882	194.907	1316.85	355.295	76.0375	413.618	2761.58	951.543	0.609629	Metformin	1	2
82.7392	110.868	1030.25	259.829	83.2478	295.035	2350.28	628.055	0.477087	Metformin	1	2
85.9217	107.507	1012.62	224.969	86.7237	216.465	1845.29	429.793	0.411304	Metformin	1	2
81.9455	178.535	1383.33	368.548	79.1219	425.938	2717.7	892.74	0.570197	Metformin	1	2
82.9025	130.242	1070.44	279.173	82.5311	311.063	2395.02	662.741	0.522025	Metformin	1	2
80.3938	124.725	912.407	263.438	83.8536	308.662	2319.49	613.566	0.539509	Metformin	1	2
82.0427	232.282	1583.52	432.526	79.846	408.538	2565.71	819.134	0.632225	Metformin	1	2
82.8376	126.637	1134.48	285.154	80.7443	295.596	2420.31	676.444	0.455329	Metformin	1	2
81.7838	156.555	1151.06	306.539	83.0941	318.573	2407.86	655.587	0.538129	Metformin	1	2
84.3121	101.076	940.081	226.104	85.9987	218.725	1847.59	450.683	0.412766	Metformin	1	2
83.6306	157.966	1152.62	299.34	81.9866	327.701	2463.67	713.209	0.591998	Metformin	1	2
82.3849	156.632	1160.44	313.957	82.162	309.091	2363.6	669.253	0.542226	Metformin	1	2
84.0779	128.676	1203.22	281.337	80.6039	339.686	2664.01	771.099	0.537461	Metformin	1	2
82.8357	127.358	1112.71	279.867	81.0866	284.246	2388.47	678.313	0.557933	Metformin	1	2
84.548	158.391	1128.87	291.308	85.59	288.311	2204.97	569.072	0.536878	Metformin	2	2
82.2599	156.366	1180.31	317.591	82.0132	386.539	2598.88	730.79	0.513168	Metformin	2	2
81.6563	223.172	1427.48	392.955	80.1275	444.856	3014.28	899.33	0.625794	Metformin	2	2
81.1583	174.201	1234	349.06	79.679	373.694	2511.41	780.54	0.530477	Metformin	2	2
82.4583	155.907	1398.86	349.129	72.0117	447.109	2915.98	1115.75	0.586955	Metformin	2	2
80.6623	220.09	1353.85	387.939	83.6976	372.271	2535.98	713.435	0.63706	Metformin	2	2
83.0945	179.874	1161.57	325.147	82.8556	324.691	2373.6	650.076	0.59281	Metformin	2	2
81.8903	175.96	1384.83	373.444	73.4143	368.803	2777.63	996.041	0.573262	Metformin	2	2
81.0208	182.45	1264.03	366.313	78.8876	385.608	2792.65	884.339	0.639378	Metformin	2	2
82.4925	179.093	1553.55	393	79.2526	396.047	2602.57	843.238	0.545582	Metformin	2	2
87.5588	80.6909	1060	200.112	77.9583	363.597	2509.79	827.698	0.546787	Metformin	2	2
81.4152	169.897	1253.16	347.357	78.1845	353.036	2426.15	793.693	0.594523	Metformin	2	2
87.8932	98.7275	1213.07	227.53	81.4419	275.35	2079.74	614.845	0.460488	Metformin	2	2
78.4583	196.944	1526.08	411.135	81.09	458.424	3233.45	960.352	0.644083	Metformin	2	2
81.3427	139.245	1353.5	355.085	74.8793	364.987	2867.47	972.679	0.509319	Metformin	2	2
81.3347	152.808	1289.72	347.003	76.4516	326.616	2581.09	841.683	0.524836	Metformin	2	2
82.9864	136.08	1140.68	293.945	82.7534	304.035	2309.54	627.674	0.490184	Metformin	2	2
84.3236	150.595	1094.27	284.293	84.5471	286.797	2286.81	553.715	0.507364	Metformin	2	2
82.1151	153.398	1334.09	336.515	80.0943	343.271	2654.53	770.298	0.511782	Metformin	2	2
81.6401	214.707	1416.35	413.728	77.6361	428.08	2934.61	958.682	0.644268	Metformin	2	2
80.1269	169.931	1296.22	370.987	77.7146	339.698	2634.27	814.992	0.54642	Metformin	2	2
80.5863	142.457	1408.6	374.538	74.0675	333.755	2486.32	872.397	0.501296	Metformin	2	2
83.1298	213.714	1299.47	364.072	79.8695	366.29	2592.29	797.049	0.633071	Metformin	2	2
82.3125	161.735	1213.81	324.545	82.6922	321.192	2457.12	676.074	0.553109	Metformin	2	2
82.1032	152.761	1236.8	331.093	81.2948	354.835	2653.21	740.197	0.455282	Metformin	2	2
81.5648	215.943	1409.47	393.671	79.4339	385.748	2675.94	844.278	0.6459	Metformin	2	2
83.7043	166.817	1222.36	320.203	77.5392	372.818	2678.32	870.088	0.580735	Metformin	2	2
82.3672	212.76	1716.56	452.975	77.866	310.102	2990.45	878.881	0.623942	Metformin	2	2
86.2602	116.921	1145.49	250.966	81.4603	303.168	2427.93	689.771	0.510948	Metformin	2	2
83.8632	178.734	1229.95	330.713	83.03	320.91	2426.21	673.929	0.593087	Metformin	2	2
81.3408	142.064	1110	304.633	81.595	305.607	2261.68	649.228	0.522319	Metformin	2	2
80.3165	178.271	1227.37	372.984	80.9201	346.718	2355.58	730.255	0.591186	Metformin	2	2
82.6557	218.677	1518.37	405.049	78.3974	441.643	2666.16	900.093	0.641362	Metformin	2	2
78.8162	209.23	1397.11	430.686	78.1238	387.095	2804.39	906.267	0.662477	Metformin	2	2
81.7927	208.069	1388.01	394.973	77.8138	394.191	2687.82	895.058	0.604652	Metformin	2	2
79.11	157.153	1159.56	343.623	77.8996	347.359	2679.67	853.708	0.563529	Metformin	2	2
79.24	194.794	1215.07	379.094	78.6228	391.56	2673.39	864.799	0.601577	Metformin	2	2
84.7183	149.104	1104.26	281.998	83.6183	283.087	2171.2	588.898	0.461496	Metformin	2	2
83.1299	223.457	1547.09	414.611	68.2381	402.388	2896.57	1190.59	0.668332	Metformin	2	2
82.0492	264.409	1861.83	482.147	74.8756	444.459	2771.84	996.88	0.654381	Metformin	2	2
83.329	192.515	1624.05	392.96	74.8989	518.578	3017.79	1134.71	0.626352	Metformin	2	2
84.6662	131.752	1112.18	260.964	80.4876	282.007	2302.92	668.313	0.569459	Metformin	2	2
80.7295	187.277	1461.84	414.1	72.6342	351.12	2619.34	961.762	0.627162	Metformin	2	2
78.9991	242.435	1381.11	442.031	80.5815	441.883	2593.53	845.617	0.66302	Metformin	2	2
67.1541	256.57	1530.47	634.777	65.7872	365.801	2175.53	972.935	0.549369	Metformin	3	2
76.6865	155.427	1398.75	425.062	73.531	337.538	2543.09	915.052	0.544661	Metformin	3	2
80.4651	127.306	1131.49	314.068	79.0889	277.752	2205.76	671.528	0.488043	Metformin	3	2
76.4174	148.688	1222.94	383.191	74.855	315.427	2217.89	786.071	0.496281	Metformin	3	2
82.0297	150.515	1178.97	321.392	81.0638	353.564	2444.67	737.048	0.521648	Metformin	3	2
75.9758	138.224	1364.41	407.326	69.4634	282.06	2374.89	918.705	0.481217	Metformin	3	2
86.2084	146.918	1561.9	321.278	77.7952	406.833	3200.79	1007.77	0.570206	Metformin	3	2
83.3237	128.692	1134.74	286.232	81.7935	289.672	2351.72	658.271	0.507184	Metformin	3	2
83.0644	119.1	985.682	247.116	81.656	338.859	2419.16	706.604	0.561572	Metformin	3	2
70.1891	170.947	1341.9	467.841	68.721	315.737	2359.4	951.989	0.489968	Metformin	3	2
82.9764	138.67	1171.69	298.803	80.0842	321.369	2461.55	736.544	0.53504	Metformin	3	2
79.2923	202.03	1441.25	410.642	76.98	412.358	2695.29	912.417	0.569761	Metformin	3	2
79.8536	142.563	1447.71	381.846	72.5756	292.559	2554.48	899.184	0.52946	Metformin	3	2
79.507	130.115	1187.07	336.644	75.7309	287.02	2149.68	733.147	0.492367	Metformin	3	2
81.9131	138.829	1141.83	299.859	82.0847	345.338	2452.53	707.396	0.530582	Metformin	3	2
82.6912	130.377	1086.02	279.318	81.5617	324.051	2565.63	721.173	0.535616	Metformin	3	2
81.8766	139.17	1153.14	309.532	80.6323	311.864	2494.77	724.674	0.534758	Metformin	3	2
81.9929	140.988	1181.32	307.702	81.9671	320.646	2396.53	686.626	0.545228	Metformin	3	2
66.41	235.482	1542.58	611.911	65.4231	338.509	2267.65	1000.81	0.502505	Metformin	3	2
81.4615	164.315	1275.96	339.256	80.1503	359.348	2693.23	799.795	0.56332	Metformin	3	2
83.1072	123.813	1059.56	267.435	80.829	317.073	2575.69	739.958	0.550883	Metformin	3	2
82.0932	131.351	1098.23	290.655	81.7014	320.91	2417.52	694.682	0.529541	Metformin	3	2
82.5442	136.706	1113.02	295.859	83.1232	280.226	2179.74	582.183	0.505523	Metformin	3	2
83.6459	125.352	1157.58	279.749	78.407	319.759	2523.72	783.46	0.509262	Metformin	3	2
79.8887	141.649	1304.16	355.642	76.0463	355.989	2658.02	898.38	0.49347	Metformin	3	2
82.4742	129.48	1179.95	300.165	78.952	320.662	2549.88	781.241	0.480482	Metformin	3	2
80.4647	153.563	1033.49	305.169	83.407	330.952	2328.97	657.108	0.574637	Metformin	3	2
83.5527	151.58	1451.96	349.556	75	411.349	2898.39	1017.29	0.575026	Metformin	3	2
80.5741	171.439	1393.39	387.245	77.4703	385.04	2590.85	881.782	0.601614	Metformin	3	2
80.5589	192.438	1336.15	376.282	77.7283	377.259	2693.11	889.904	0.628345	Metformin	3	2
84.4456	146.741	1714.04	366.189	67.3822	460.329	3847.49	1455.84	0.613547	Metformin	3	2
78.8534	121.004	1107.02	319.376	78.1437	344.264	2773.45	873.652	0.588124	Metformin	3	2
83.025	207.756	1542.95	397.713	78.4309	434.073	2778.24	921.387	0.639132	Metformin	3	2
82.2642	119.888	1046.05	270.791	80.6654	315.52	2469.2	724.302	0.571614	Metformin	3	2
92.0521	53.805	880.603	120.452	84.2073	229.779	2059.7	520.706	0.467336	Metformin	3	2
81.4301	119.586	1137.21	295.542	78.954	314.348	2517.49	768.769	0.546051	Metformin	3	2
81.1878	163.997	1503.38	398.29	52.1319	443.651	2978.08	1635.35	0.689951	Metformin	3	2
80.7076	146.47	1115.53	304.779	72.661	341.652	2665.74	977.672	0.617009	Metformin	3	2
80.554	145.051	1186.99	333.672	78.0206	347.067	2357.75	776.323	0.545127	Metformin	3	2
81.9492	116.677	924.3	251.117	81.7898	279.621	2345.17	651.349	0.535692	Metformin	3	2
81.6498	237.725	1651.39	468.34	80.7057	444.726	2736.1	881.735	0.65107	Metformin	3	2
82.2299	141.631	1033.94	279.088	82.596	340.47	2469.64	701.234	0.578526	Metformin	3	2
82.6949	199.588	1310.38	363.941	82.665	372.415	2685.65	743.379	0.601996	Metformin	3	2
81.261	187.813	1335.33	377.398	79.7316	391.977	2629.39	839.323	0.630657	Metformin	3	2
79.675	211.296	1596.22	455.81	71.3994	467.618	2980.07	1140.59	0.682352	Metformin	3	2
81.8647	237.282	1421.22	419.275	82.4945	418.508	2809.24	817.501	0.667016	Metformin	3	2
80.4614	261.817	1313.76	412.083	78.2134	559.603	3475.57	1121.81	0.667992	Metformin	4	2
81.7057	183.418	1719.13	428.108	78.7319	582.488	3052.67	1092.43	0.528219	Metformin	4	2
82.569	151.574	1198.2	310.906	81.5787	308.05	2254.6	672.646	0.499	Metformin	4	2
86.9421	88.5731	929.817	193.622	67.1057	243.77	2670.43	1052.44	0.579638	Metformin	4	2
82.7265	120.192	1315.7	310.464	53.9171	343.323	2956.23	1524.71	0.599255	Metformin	4	2
80.3041	121.306	1297.91	340.262	74.9676	311.511	2347.85	797.573	0.495423	Metformin	4	2
81.6675	164.838	1538.21	394.507	69.6794	419.315	3031.3	1195.1	0.622342	Metformin	4	2
65.6344	245.566	1464.3	592.481	63.2946	327.988	2186.37	1007.43	0.527221	Metformin	4	2
93.8202	52.7772	1114.32	115.842	72.4222	252.373	2490.07	867.007	0.490873	Metformin	4	2
85.8974	99.3377	1047.91	215.388	67.7141	271.08	2791.44	1087.77	0.582049	Metformin	4	2
83.1786	143.915	1216.27	311.641	81.7396	317.666	2239.7	652.768	0.513132	Metformin	4	2
82.6801	123.359	1162.16	290.366	78.5309	354.265	2418.13	802.108	0.519161	Metformin	4	2
82.2384	129.141	1199.05	305.146	78.8852	324.487	2473.25	759.672	0.489703	Metformin	4	2
82.7542	135.731	1244.88	312.673	76.1041	358.079	2715.75	910.757	0.60956	Metformin	4	2
81.8813	143.29	1275.25	328.64	80.0212	291.299	2436.04	716.307	0.533824	Metformin	4	2
86.6132	91.7669	884.521	190.409	85.2107	226.633	2191.96	516.304	0.553608	Metformin	4	2
84.6207	122.363	1118.49	263.25	79.3127	329.319	2597.2	776.921	0.567927	Metformin	4	2
77.6453	157.272	1343.36	398.287	74.7251	312.708	2245.83	792.503	0.519405	Metformin	4	2
82.5367	132.877	1294.29	322.822	79.0679	297.219	2529.7	742.342	0.502144	Metformin	4	2
82.9201	125.207	1135.18	285.901	81.0899	282.696	2229.14	643.31	0.495074	Metformin	4	2
83.6452	136.84	1219.11	290.237	80.9817	290.966	2859.32	762.794	0.540985	Metformin	4	2
82.2542	135.326	1141.68	301.142	80.9472	301.624	2462.31	706.923	0.54313	Metformin	4	2
81.6925	144.096	1169.61	316.577	81.8001	312.832	2238.25	652.574	0.511217	Metformin	4	2
81.7943	128.221	1046.71	279.761	81.46	294.817	2435.81	688.11	0.55867	Metformin	4	2
81.1011	132.985	1146.15	307.191	79.6089	315.694	2517.93	757.062	0.545976	Metformin	4	2
82.4693	148.051	1805.27	403.624	55.7014	375.205	3295.18	1664.17	0.573044	Metformin	4	2
83.159	98.441	923.823	229.781	82.6473	273.286	2308.66	627.506	0.505368	Metformin	4	2
81.7085	206.696	1547.08	420.592	71.9923	385.412	2873.69	1076.52	0.656578	Metformin	4	2
81.6034	142.27	1081.47	291.648	80.3334	337.767	2593.1	773.304	0.569567	Metformin	4	2
83.8053	114.274	1047.12	255.786	81.7894	277.391	2365.85	651.541	0.51944	Metformin	4	2
84.9133	140.507	1535.11	342.373	69.828	543.791	3096.03	1275.14	0.615977	Metformin	4	2
84.7283	133.18	1450.9	322.928	73.0144	453.6	3082.46	1118.38	0.610016	Metformin	4	2
83.0008	189.915	1602.12	415.959	72.7701	468.944	3030.78	1138.41	0.62432	Metformin	4	2
80.6382	223.205	1472.19	429.969	76.6281	431.092	2739.53	958.471	0.663961	Metformin	5	2
81.3886	173.711	1275.43	357.549	67.2792	375.285	2764.44	1171.65	0.594914	Metformin	5	2
82.4869	170.599	1270.21	324.371	81.3801	384.692	2540.81	788.105	0.606299	Metformin	5	2
83.6395	221.578	1568.18	410.275	80.3965	387.189	2543.42	803.266	0.646696	Metformin	5	2
76.0274	244.235	2054.36	612.96	76.2189	444.908	2934.18	1035.96	0.670594	Metformin	5	2
85.6603	129.157	1165.07	267.355	82.9837	287.961	2379.64	635.383	0.519002	Metformin	5	2
96.6125	29.7006	1252.07	69.9941	77.3124	262.283	2682.85	812.511	0.47218	Metformin	5	2
84.2627	110.412	1104.83	256.171	79.4936	365.099	2544.06	812.961	0.602497	Metformin	5	2
84.8996	124.63	1175.21	265.094	82.5657	302.803	2253.55	650.705	0.517629	Metformin	5	2
81.6367	204.646	1583.25	416.48	76.1287	406.981	2787.68	969.699	0.652923	Metformin	5	2
82.9137	166.615	1256.38	331.542	80.3957	335.823	2447.21	738.898	0.598297	Metformin	5	2
83.0665	111.044	945.85	243.789	85.3128	265.468	2010.23	520.804	0.517195	Metformin	5	2
82.7608	118.868	1004.74	256.683	81.0696	302.699	2259.92	672.352	0.549335	Metformin	5	2
82.7419	132.419	1221.42	301.57	78.2106	285.75	2328.84	721.989	0.544416	Metformin	5	2
85.2078	129.221	1171.79	271.189	81.0694	303.731	2837.22	765.618	0.554271	Metformin	5	2
84.144	131.282	1070.56	265.323	83.6917	278.527	2171.46	573.048	0.492919	Metformin	5	2
83.9404	107.03	1020.66	244.166	81.5783	251.769	2206.61	614.04	0.483811	Metformin	5	2
85.0728	108.636	998.663	231.26	84.8101	233.896	2300.65	549.091	0.486878	Metformin	5	2
82.1898	143.612	1254.21	328.218	79.9464	290.234	2416.94	720.158	0.473506	Metformin	5	2
83.9866	126.101	1168.57	280.968	81.562	290.018	2586.74	691.837	0.536692	Metformin	5	2
83.4696	121.005	1057.97	264.874	84.3816	263.984	2199.52	561.225	0.455392	Metformin	5	2
78.0972	119.643	1356.04	376.633	70.6545	303.288	2331.55	894.345	0.471666	Metformin	5	2
82.845	132.459	1181.29	297.789	82.2019	291.331	2310.88	648.566	0.553752	Metformin	5	2
84.4973	131.833	1181.32	279.666	81.9159	351.565	2842.25	783.896	0.582099	Metformin	5	2
80.4449	152.064	1044.15	300.934	84.4103	346.663	2508.03	673.996	0.583357	Metformin	5	2
80.9342	169.895	1060.86	311.889	83.7806	326.673	2384.77	657.208	0.611823	Metformin	5	2
86.2516	76.8734	995.792	196.056	77.986	234.793	2821.24	797.756	0.542845	Metformin	5	2
81.4063	217.719	1461	413.672	78.6579	384.682	2759.84	875.389	0.66363	Metformin	5	2
81.3113	154.2	1394.39	349.769	66.8223	362.375	3409.3	1357.11	0.616727	Metformin	5	2
82.5541	114.447	1004.77	257.412	79.4207	314.606	2519.46	764.651	0.555556	Metformin	5	2
80.9825	189.862	1137.81	342.526	81.8577	365.175	2529.12	754.67	0.651661	Metformin	5	2
72.0896	203.949	1578.01	561.166	68.9236	340.472	2419.82	991.253	0.537088	Metformin	5	2
80.7258	142.2	1156.27	322.658	78.4173	311.317	2541.7	791.471	0.579883	Metformin	5	2
83.4861	103.757	905.014	225.604	83.5271	237.741	2138.63	556.346	0.528435	Metformin	5	2
88.0451	108.651	1019.39	206.41	87.1972	221.606	2521.26	441.85	0.439985	Metformin	5	2
82.4172	118.415	982.747	256.672	84.2799	265.655	2138.48	560.266	0.521794	Metformin	5	2
83.864	77.157	915.043	202.316	77.8046	242.831	2393.18	729.939	0.536523	Metformin	5	2
80.4042	130.361	1294.92	342.055	74.6925	285.367	2788.8	910.086	0.564715	Metformin	5	2
81.0657	184.913	1305.33	366.844	76.5717	373.497	2960.55	981.457	0.654901	Metformin	5	2
83.9314	126.387	1216.27	282.88	74.1627	301.883	2830.68	949.907	0.608075	Metformin	5	2
82.9089	141.779	1166.99	294.292	74.2321	330.133	2778.7	956.384	0.626052	Metformin	5	2
80.1392	223.697	1611.15	461.446	74.6848	411.106	2977.32	1048.18	0.681218	Metformin	5	2
82.4253	171.303	1188.83	325.563	81.0396	345.927	2521.21	742.924	0.607636	Metformin	5	2
75.1832	251.411	1816.58	594.032	67.0818	355.31	2584.66	1081.29	0.751295	Control	1	3	167
78.5563	238.938	1797.48	543.015	70.7053	315.61	2345.88	919.765	0.728314	Control	1	3
79.989	214.356	1625.88	471.546	77.6015	233.865	2350.34	710.991	0.728004	Control	1	3
80.6806	225.604	1692.17	493.823	75.3913	312.49	2355.73	819.361	0.761261	Control	1	3
80.722	202.833	1743.53	493.201	75.7866	229.827	2237.2	747.581	0.713821	Control	1	3
84.4494	163.851	1187.43	307.514	85.5072	175.713	1964.52	437.763	0.670837	Control	1	3
84.3776	189.748	1449.59	373.044	80.8386	202.24	2147.28	586.976	0.697551	Control	1	3
79.3418	199.479	1400.8	419.947	77.9041	228.838	2175.67	659.588	0.689294	Control	1	3
78.9639	265.128	1944.72	569.778	69.3971	370.545	2553.69	1033.83	0.794259	Control	1	3
78.3315	264.359	1886.06	566.312	69.2038	324.733	2509.3	992.1	0.763965	Control	1	3
80.9179	221.381	1646.1	451.632	75.4884	279.61	2530.42	828.384	0.767194	Control	1	3
81.3127	245.924	1718.52	488.234	74.9369	272.555	2339.64	804.994	0.759112	Control	1	3
81.8362	216.225	1557.63	443.5	79.1448	243.257	2148.33	662.233	0.706867	Control	1	3
78.2023	259.499	1813.82	566.815	72.5304	288.063	2345.38	871.239	0.755474	Control	1	3
79.956	263.254	1889.74	552.802	72.0503	325.13	2635.29	972.097	0.777376	Control	1	3
75.4331	304.622	2250.59	716.921	63.7002	409.602	2836.57	1272.62	0.790454	Control	1	3
73.6495	323.365	2053.84	710.124	59.9048	404.567	2822.05	1359.66	0.784052	Control	1	3
72.7313	390.847	2224.49	800.734	68.0116	507.112	3027.61	1292.23	0.79731	Control	1	3
78.068	242.422	1951.31	569.663	71.2988	341.322	2574.34	1001.57	0.756439	Control	1	3
79.1072	332.35	1956.86	608.167	74.5029	359.094	2602.78	929.533	0.791248	Control	1	3
82.9532	239.587	1535.47	432.249	79.6196	244.436	2174.75	666.833	0.694717	Control	1	3
79.7261	252.327	1715.73	523.574	77.0589	335.592	2373.36	821.978	0.702242	Control	1	3
79.3138	242.427	1648.43	500.4	75.6828	280.284	2286.78	777.879	0.688012	Control	1	3
79.6306	225.157	1496.11	431.576	77.9743	312.06	2409.5	765.18	0.750978	Control	1	3
78.9636	258.435	1827	565.092	74.5054	289.954	2426.86	849.711	0.749187	Control	2	3
77.5951	351.265	2286.28	727.871	69.2779	477.02	2726.49	1155.44	0.797697	Control	2	3
70.8926	420.582	2116.51	851.292	62.38	499.224	3048.19	1435.11	0.796061	Control	2	3
82.2373	249.982	1558.24	455.279	80.3981	277.93	2179.14	657.926	0.7588	Control	2	3
78.2845	256.797	1831.33	565.288	72.6748	294.254	2355.81	883.122	0.741177	Control	2	3
70.239	360.949	2224.04	848.489	63.9476	455.764	2929.76	1322.32	0.783966	Control	2	3
82.9077	198.453	1734.1	435.535	77.1796	258.042	2469.33	768.487	0.703921	Control	2	3
71.2396	308.498	2340.67	808.921	61.2052	382.029	2804.54	1312.29	0.776991	Control	2	3
81.8588	270.901	1638.37	492.924	80.3065	269.587	2206.37	658.59	0.751416	Control	2	3
74.4556	307.393	1965.5	668.731	68.32	313.082	2502.77	1014.59	0.746483	Control	2	3
78.0699	241.666	1950.22	596.021	71.6276	234.371	2441.18	858.678	0.722307	Control	2	3
78.8906	219.327	1875.35	534.343	66.1182	273.998	2644.49	1080.98	0.762791	Control	2	3
79.033	191.181	1742.92	490.517	72.6034	257.865	2707.97	928.292	0.763908	Control	2	3
78.1311	239.47	1727.53	519.5	74.206	245.532	2414.68	808.422	0.749545	Control	2	3
72.1141	287.466	1648.01	624.078	70.5884	251.27	2384.07	882.24	0.727899	Control	2	3
74.8275	238.848	1789.73	601.942	69.3932	263.902	2400.12	934.678	0.730124	Control	2	3
81.9903	210.6	1546.32	426.88	75.7183	234.599	2302.16	734.059	0.732467	Control	2	3
67.5563	343.208	1992.3	786.466	62.7817	337.592	2453.78	1123.51	0.715974	Control	2	3
79.415	234.792	1590.74	490.442	78.1685	235.375	2094.82	656.137	0.700911	Control	2	3
79.2843	226.472	1634.01	499.15	73.9618	252.533	2286.3	797.936	0.717856	Control	2	3
79.7857	249.665	1632.2	517.237	79.4435	204.368	1953.99	576.925	0.662915	Control	2	3
79.6189	223.997	1510.9	462.54	78.3469	213.61	2085.78	624.19	0.682541	Control	2	3
75.9329	238.958	1675.65	562.517	76.1269	220.667	2107.91	670.904	0.666702	Control	2	3
72.5745	336.893	2156.15	766.168	63.3836	370.611	2755.51	1229.13	0.789757	Control	2	3
81.4343	255.771	1682.67	498.863	77.5898	236.532	2027.81	665.715	0.695003	Control	2	3
64.6675	330.773	2059.43	872.216	62.5982	310.812	2394.1	1086.92	0.704712	Control	2	3
72.6743	337.169	1998.03	740.899	67.305	327.491	2259.61	954.665	0.721023	Control	2	3
79.4635	224.869	1342.44	413.871	74.7823	266.172	2468.74	823.348	0.696897	Control	2	3
77.9109	262.91	1762.88	566.41	75.9039	268.475	2368.92	774.804	0.725471	Control	2	3
79.4306	238.001	1818.93	517.837	70.4292	325.956	2491.79	964.039	0.725536	Control	2	3
79.0121	222.925	1824.71	520.544	70.5085	266.325	2509.41	928.001	0.720613	Control	2	3
81.9543	214.552	1649.36	447.081	73.4414	260.325	2267.31	794.056	0.71246	Control	2	3
78.7338	227.797	1720.36	511.847	74.7121	288.091	2369.46	822.506	0.698354	Control	2	3
82.2804	192.826	1472.94	398.516	79.1873	216.095	2227.36	640.507	0.676769	Control	2	3
81.3744	190.637	1478.5	403.61	75.9687	232.445	2296.91	728.602	0.682376	Control	2	3
80.4341	209.549	1643.27	463.143	75.1675	257.107	2294.85	763.552	0.705783	Control	2	3
76.7274	235.998	1749.4	548.253	71.6337	265.539	2366.16	867.08	0.688129	Control	3	3
81.217	217.184	1750.34	479.206	73.0081	241.286	2510.19	856.421	0.72446	Control	3	3
76.8387	215.157	1908.02	575.144	67.9674	259.019	2452.83	961.375	0.699306	Control	3	3
82.6175	198.016	1605.41	425.942	78.4507	192.619	2323.63	652.82	0.703196	Control	3	3
78.3967	198.037	1461.5	440.238	76.9207	231.552	2204.56	690.904	0.67648	Control	3	3
83.6779	182.987	1480.22	375.026	73.607	226.98	2265.64	764.102	0.714341	Control	3	3
76.5189	238.281	1901.43	576.007	65.2671	456.167	2873.58	1283.09	0.709144	Control	3	3
74.6437	258.72	1706.21	576.487	69.3692	272.718	2553.39	971.057	0.711853	Control	3	3
80.5802	225.3	1775.62	490.568	72.2614	287.889	2584.57	922.392	0.721655	Control	3	3
80.96	214.632	1523.45	449.298	78.1104	224.193	2075.96	647.089	0.685382	Control	3	3
73.0794	242.545	2081.3	682.646	62.119	346.679	2622.63	1203.29	0.716646	Control	3	3
75.4446	296.667	2623.01	846.995	68.373	158.52	2524.85	905.117	0.681071	Control	3	3
77.183	297.244	1367.48	467.566	64.6074	325.02	2433.41	1059.82	0.71272	Control	3	3
80.0491	226.176	1554.55	456.599	77.2905	243.34	2218.29	694.549	0.663201	Control	3	3
80.0781	186.847	1444.58	409.437	77.5073	225.043	2134.16	660.245	0.637756	Control	3	3
79.2372	226.14	1533.01	456.747	76.2915	288.266	2293.53	769.717	0.683879	Control	3	3
76.6598	245.578	1657.9	551.434	76.8794	215.205	2030.38	635.427	0.603974	Control	3	3
81.3799	192.75	1487.9	406.265	78.7317	237.961	2190.02	657.508	0.676637	Control	3	3
79.4482	233.158	1633.38	481.12	75.7921	296.411	2326.65	803.966	0.674138	Control	3	3
79.3336	245.929	1930.98	541.158	70.6952	320.751	2500.98	963.729	0.715253	Control	3	3
79.0948	302.684	1931.37	599.273	71.2798	346.831	2433.12	941.456	0.731284	Control	3	3
74.8071	255.808	1950.46	627.41	66.0989	307.605	2568.37	1070.66	0.705752	Control	3	3
75.1527	296.795	2108.5	674.724	68.8167	383.239	2789.43	1133.53	0.807171	Control	3	3
76.0085	254.181	1945.82	615.201	64.8299	282.885	2573.23	1085.65	0.731229	Control	3	3
77.5578	231.669	1719.85	532.079	72.8914	254.682	2227.23	789.769	0.671653	Control	3	3
81.6289	210.569	1818.06	482.826	73.7667	249.833	2384.51	815.765	0.71975	Control	3	3
80.3188	230.8	1632	475.238	75.6872	265.168	2278.69	759.295	0.683141	Control	3	3
80.5259	215.42	1586.86	458.619	77.3666	221.215	2205.91	672.453	0.644832	Control	3	3
80.2919	213.552	1564.96	444.038	77.3323	250.142	2244.25	701.7	0.660185	Control	3	3
81.8598	201.514	1549.04	429.865	79.2214	229.234	2104.86	629.316	0.685982	Control	3	3
77.2424	252.539	1874.31	580.376	70.747	324.928	2555.98	976.665	0.736702	Control	3	3
78.6394	259.055	1743.34	537.075	75.7478	253.762	2199.07	738.399	0.672299	Control	3	3
80.0239	283.874	2023	582.119	72.8867	356.791	2547.77	947.311	0.713231	Control	3	3
78.1628	229.261	1975.21	575.458	65.8419	276.134	2587.42	1065.27	0.742083	Control	3	3
75.6015	236.408	1845.85	592.844	68.5693	257.334	2364.67	926.561	0.691305	Control	3	3
78.576	264.093	1654.09	543.034	77.9341	221.14	2054.41	644.228	0.694545	Control	3	3
75.0665	270.615	1859.21	619.863	71.2075	289.343	2377.61	887.379	0.678007	Control	3	3
75.886	254.246	1782.79	590.583	74.4413	247.663	2249.46	757.416	0.690623	Control	3	3
74.7112	248.362	1876.3	610.515	67.9226	258.692	2437.17	957.7	0.707078	Control	3	3
77.2651	226.207	1845.72	564.929	70.2887	267.404	2438.43	910.347	0.702557	Control	3	3
71.7198	277.112	1932.89	691.696	69.5214	264.795	2362.47	903.738	0.674699	Control	3	3
77.5105	260.757	1718.94	544.422	75.9425	289.422	2266.6	760.167	0.688195	Control	3	3
82.3137	199.098	1569.92	420.029	77.2029	224.429	2221.68	685.224	0.695776	Control	3	3
78.9732	244.976	1981.77	569.612	65.2619	270.933	2632.19	1089.46	0.735631	Control	3	3
75.9421	255.442	1812.31	602.017	73.3453	238.4	2204.8	770.619	0.66667	Control	3	3
79.318	227.744	1630.63	495.551	77.6171	203.095	2122.24	639.432	0.656552	Control	3	3
77.7088	278.432	1701.59	579.006	76.2956	206.845	1946.78	639.75	0.672598	Control	3	3
81.3578	227.662	1557.74	442.896	74.4206	244.411	2508.31	826.531	0.712882	Control	3	3
75.0689	260.436	1719.97	587.102	70.9443	254.001	2321.29	858.326	0.699489	Control	3	3
72.8436	294.612	1996.05	689.409	69.1081	300.383	2400.71	939.172	0.682646	Control	3	3
78.8873	240.509	1827.85	555.489	73.5286	250.261	2304.7	814.83	0.695851	Control	3	3
77.9072	260.993	1797.15	562.346	73.792	274.309	2378.3	824.264	0.714316	Control	3	3
75.9966	244.967	1902.82	574.984	68.7804	290.957	2672.27	1031.59	0.724109	Control	3	3
77.9189	221.401	1796.84	525.502	67.5701	277.755	2616.81	1041.74	0.754554	Control	3	3
76.6723	264.786	2046.24	635.785	69.4067	298.97	2517.05	974.447	0.744069	Control	3	3
75.8231	263.567	1867.56	614.902	70.5009	251.483	2322.64	875.473	0.713983	Control	3	3
74.5995	251.231	1722.65	583.009	69.548	284.842	2503.43	962.948	0.729524	Control	3	3
75.8354	232.764	1683.05	544.279	67.1804	263.972	2571.05	1023.1	0.739429	Control	3	3
79.0065	222.977	1723.95	505.886	73.6902	255.301	2401.66	819.798	0.730071	Control	3	3
77.1695	267.846	1731.8	560.256	77.8344	337.657	2490.07	807.51	0.742982	Control	3	3
74.7917	267.14	1677.83	574.608	74.7963	246.752	2267.62	756.695	0.698361	Control	3	3
76.9805	236.395	1636.86	530.321	75.3386	267.485	2424.72	799.689	0.711645	Control	3	3
77.0463	244.461	1531.95	517.188	76.8203	209.33	2120.03	651.051	0.679816	Control	3	3
72.7711	373.728	1822.27	703.464	68.0756	275.979	2396.84	948.065	0.724218	Control	3	3
74.4902	265.927	1815.84	624.169	75.7434	273.867	2243.83	748.983	0.677406	Control	3	3
72.3325	270.429	1827.94	646.514	67.5319	274.035	2397.8	964.06	0.708354	Control	3	3
73.7098	257.476	1769.01	605.839	71.4115	259.162	2368.14	861.573	0.696551	Control	3	3
74.0019	275.61	1870.02	637.279	70.3588	270.535	2531.18	940.028	0.73461	Control	3	3
74.461	245.315	1859.41	609.835	67.6244	250.389	2464.3	966.271	0.712042	Control	3	3
76.9064	261.013	1655.15	550.864	77.5836	246.217	2211.03	688.152	0.674439	Control	3	3
74.2425	254.921	1849.09	612.208	69.7552	270.331	2434.48	922.737	0.717446	Control	3	3
71.4902	243.598	1788.5	632.434	66.7786	243.224	2395.43	957.773	0.705233	Control	3	3
63.8889	382.857	2038.93	897.642	65.1193	308.231	2302.61	1000.47	0.704143	Control	3	3
79.9186	250.601	1662.83	493.681	76.0284	304.683	2444.09	818.295	0.751635	Control	3	3
73.2205	241.704	1884.08	647.575	67.1707	280.389	2552.47	1022.89	0.72363	Control	3	3
85.2164	187.87	1538.97	369.514	81.1177	207.571	2063.05	588.213	0.692655	Control	4	3
78.8127	236.025	1801.9	540.265	69.2923	358.21	2595.89	1045.78	0.721702	Control	4	3
82.7852	187.04	1513.11	400.477	80.1664	197.727	2110.27	586.588	0.658357	Control	4	3
79.3851	242.347	1961.04	561.095	73.5574	292.98	2468.12	883.07	0.696489	Control	4	3
82.5811	197.734	1816.89	466.241	72.7878	250.081	2432.51	854.049	0.721532	Control	4	3
79.7769	219.532	1610.07	487.486	75.6023	273.985	2405.36	797.406	0.757962	Control	4	3
84.1474	176.278	1412.68	357.52	81.2596	200.273	2125.49	572.719	0.664005	Control	4	3
80.5106	246.122	1756.99	504.181	76.2591	274.775	2341.58	771.111	0.695812	Control	4	3
81.0149	256.333	1742.96	498.662	74.7456	280.993	2514.77	839.998	0.745493	Control	4	3
81.7986	225.573	1762.03	482.421	72.5672	253.137	2442.12	855.392	0.732167	Control	4	3
81.3851	204.873	1715.41	467.159	71.63	250.039	2323.73	854.694	0.688314	Control	4	3
80.593	193.464	1495.04	428.511	77.3482	189.935	2096.78	631.237	0.664827	Control	4	3
70.6685	307.19	1968.81	743.998	68.5116	268.618	2230.48	884.944	0.651453	Control	4	3
83.8457	192.78	1457.98	376.493	80.7393	198.014	2135.71	579.056	0.683779	Control	4	3
83.6056	201.254	1537.81	405.119	81.1419	191.126	2077.6	559.358	0.679621	Control	4	3
82.6923	189.534	1592.4	410.305	75.3906	222.019	2378.99	752.431	0.699699	Control	4	3
76.7433	236.877	1763.1	563.898	70.4116	264.17	2589.15	956.683	0.751765	Control	4	3
80.2533	210.403	1785.12	500.192	71.2408	258.274	2455.32	892.256	0.726638	Control	4	3
74.133	269.737	1862.13	642.639	69.3084	245.585	2306.45	875.843	0.705975	Control	4	3
78.3643	255.657	1779.63	551.009	73.2449	249.205	2302.23	810.455	0.706813	Control	4	3
80.3034	247.067	1746.02	520.099	75.4194	224.424	2155.09	724.326	0.68797	Control	4	3
81.4485	220.945	1708.33	476.539	75.5156	214.674	2254.5	729.84	0.704075	Control	4	3
80.1484	271.195	1573.39	510.265	79.9596	192.004	1926.02	556.377	0.670357	Control	4	3
80.9065	197.907	1485.57	422.139	79.4936	196.086	2155.78	604.214	0.698941	Control	4	3
79.7415	222.554	1699.93	490.75	73.6257	284.861	2364.87	835.376	0.7449	Control	4	3
82.5195	200.935	1571.34	429.387	76.7495	241.305	2221.21	722.648	0.727578	Control	4	3
76.4812	234.961	1615.23	528.518	75.6059	214.302	2214.03	703.519	0.68953	Control	4	3
81.5374	199.49	1520.57	421.596	77.3394	221.74	2188.49	671.368	0.66106	Control	4	3
83.1045	197.163	1548.38	401.951	76.9126	244.523	2425.02	750.973	0.718596	Control	4	3
76.8987	356.175	2191.26	702.087	70.8497	406.979	2696.53	1068.73	0.818113	Control	4	3
84.3989	145.796	1344.09	300.055	81.4911	248.638	2269.55	617.218	0.677612	Control	4	3
80.0142	249.758	1884.91	539.795	74.6674	316.053	2481.01	871.324	0.756511	Control	4	3
79.5192	245.107	1472.8	463.472	76.7659	279.029	2257.95	732.342	0.745892	Metformin	1	3	238
55.8809	485.961	1937.7	1042.25	56.3746	356.782	2165.18	1144.22	0.780278	Metformin	1	3
76.1271	340.512	1881.08	586.574	75.656	461.209	3306.76	1137.31	0.794253	Metformin	1	3
79.8207	251.236	1449.12	434.859	80.6609	321.865	2483.72	730.022	0.788001	Metformin	1	3
75.2817	259.955	1538.57	529.287	68.649	289.103	1945.47	802.04	0.756245	Metformin	1	3
80.3366	192.966	1166.9	352.687	81.875	261.845	2124.84	593.219	0.683527	Metformin	1	3
79.4894	241.681	1455.19	462.956	79.2472	294.88	2229.31	682.259	0.715629	Metformin	1	3
77.3987	274.955	1397.24	483.414	78.3524	294.188	2124.29	678.351	0.7066	Metformin	1	3
76.9249	298.494	1516.49	544.427	78.0413	284.582	2150.03	688.655	0.717147	Metformin	1	3
77.4518	294.877	1556.28	537.383	78.1881	308.768	2359.75	745.68	0.712747	Metformin	1	3
77.0216	283.872	1571.61	533.624	74.929	334.663	2344.3	826.066	0.778218	Metformin	1	3
76.7947	272.933	1468.8	517.754	76.0884	263.255	1985.4	671.086	0.746714	Metformin	1	3
76.8867	282.641	1593.96	539.955	74.9965	337.96	2287.86	812.213	0.762996	Metformin	1	3
78.2524	220.764	1415.86	430.684	78.5753	271.246	2310.89	698.712	0.754027	Metformin	1	3
73.4178	253.013	1671.04	576.593	69.1433	288.971	2510.56	972.12	0.754781	Metformin	1	3
74.8279	292.998	1697.81	606.521	77.0951	311.959	2157.99	711.221	0.735128	Metformin	1	3
77.694	262.391	1707.09	552.345	77.061	285.16	2246.18	729.471	0.721552	Metformin	1	3
72.5224	323.041	1528.29	621.533	74.0927	274.265	1709.75	645.515	0.707129	Metformin	1	3
80.8183	336.901	1818.62	564.248	78.8864	351.403	2630.99	808.831	0.809793	Metformin	1	3
80.4206	238.019	1509.71	447.955	77.8221	290.156	2374.21	753.959	0.761156	Metformin	1	3
74.9828	256.195	1616.56	551.661	72.8881	317.823	2371.92	864.264	0.74818	Metformin	1	3
82.3699	248.739	1587.7	423.908	77.7234	318.764	2304.47	750.652	0.699616	Metformin	1	3
79.492	235.459	1436.6	444.096	80.8067	316.717	2260.32	680.172	0.74153	Metformin	1	3
63.3666	306.361	1776.35	812.954	62.1264	305.296	2205.75	1020.85	0.742984	Metformin	1	3
78.9538	243.923	1492.82	458.782	74.9045	318.98	2520.03	873.696	0.791684	Metformin	1	3
79.4753	244.295	1322.64	432.471	80.0958	322.243	2492.09	743.295	0.778628	Metformin	1	3
79.1289	238.658	1274.24	419.481	78.988	302.998	2181.6	690.662	0.779102	Metformin	1	3
79.1776	233.505	1294.59	425.249	82.2919	323.765	2423.32	686.498	0.774109	Metformin	1	3
78.686	345.743	1953.93	616.54	67.969	404.399	3199.17	1274.41	0.792474	Metformin	1	3
69.1955	286.821	1504.05	622.744	73.2067	259.483	1899.79	701.438	0.719582	Metformin	1	3
78.8141	257.101	1454.57	471.865	77.5944	310.052	2362.08	762.713	0.771093	Metformin	1	3
78.0977	294.307	1705.67	561.968	74.7932	281.248	2069.5	725.707	0.724797	Metformin	1	3
77.9401	239.096	1533.88	498.964	78.1892	273.835	2183.76	681.818	0.711073	Metformin	1	3
79.8966	251.505	1416.13	463.853	80.9209	251.203	1958.7	575.754	0.701872	Metformin	1	3
80.4922	248.598	1303.77	411.44	82.0393	285.729	2123.24	609.541	0.748588	Metformin	1	3
78.95	214.848	1400.74	438.641	79.39	294.495	2240.28	688.096	0.727001	Metformin	1	3
80.8506	259.017	1517.86	464.129	80.4931	316.337	2493.26	737.241	0.724527	Metformin	1	3
81.0374	256.323	1664.32	500.263	78.1378	320.935	2481.38	786.073	0.737728	Metformin	1	3
88.9227	108.332	1150.07	220.992	90.0137	125.254	1666.24	288.08	0.680294	Metformin	1	3
83.7757	220.508	1179.13	356.307	84.188	228.034	1856.35	489.562	0.70005	Metformin	1	3
77.4911	249.217	1620.45	511.584	78.0154	328.206	2429.72	775.803	0.760983	Metformin	1	3
81.4531	186.864	1163.05	353.232	83.5098	220.031	1743.41	469.319	0.650495	Metformin	1	3
79.7206	286.807	1459.21	486.821	81.5943	344.852	2433.82	711.046	0.798932	Metformin	1	3
80.0946	234.853	1350.2	429.029	80.6402	287.323	2244.74	660.665	0.768337	Metformin	1	3
82.1223	181.542	1138.7	338.69	85.1596	210.468	1720.82	433.787	0.668152	Metformin	1	3
79.9653	294.257	1533.5	487.843	82.2206	331.721	2411.68	690.971	0.783117	Metformin	1	3
76.1132	315.04	2036.84	579.184	69.7879	449.077	3219.12	1258.47	0.824248	Metformin	1	3
78.4453	241.968	1286.41	441.859	79.9661	286.593	2193.52	663.97	0.749693	Metformin	1	3
79.9404	290.671	1601.85	494.536	80.7185	365.051	2584.13	782.627	0.80884	Metformin	1	3
82.3969	283.277	1463.06	448.268	83.2792	352.957	2663.91	726.591	0.805744	Metformin	1	3
81.1796	297.162	1661.5	488.577	70.4073	389.124	3051.53	1157.03	0.778239	Metformin	1	3
75.5423	255.317	1533.19	524.24	76.1212	296.474	2230.95	748.455	0.741573	Metformin	1	3
81.159	249.672	1510.23	463.917	80.0859	274.082	2231.35	670.462	0.751686	Metformin	1	3
81.1779	192.203	1419.97	412.594	79.2245	225.65	2047.41	602.276	0.697614	Metformin	1	3
80.0517	255.999	1529.17	482.171	76.9322	280.71	2262.62	729.802	0.730108	Metformin	1	3
78.8183	262.893	1605.88	495.247	76.7219	372.922	2856.75	928.612	0.759034	Metformin	1	3
79.3634	263.635	1559.34	502.517	77.7541	292.115	2289.75	733.77	0.737579	Metformin	1	3
73.7205	220.14	1726.5	579.994	67.3828	233.719	2467.27	961.685	0.724591	Metformin	1	3
79.0441	309.373	1580.25	511.015	81.0481	338.01	2427.27	722.107	0.800671	Metformin	1	3
72.9955	392.393	1786.63	707.136	71.3502	301.513	2129.79	823.832	0.759965	Metformin	1	3
79.7466	261.263	1649.1	496.001	77.7216	320.366	2525.92	807.111	0.762417	Metformin	1	3
77.8039	274.913	1623.49	540.743	78.838	298.518	2315.55	713.736	0.758008	Metformin	1	3
81.9966	333.476	1436.16	480.102	83.996	369.791	2340.56	682.573	0.848422	Metformin	1	3
74.7711	375.053	1747.43	701.004	75.5278	274.461	1827.99	651.502	0.726305	Metformin	1	3
82.0342	203.236	1366.17	391.344	81.8331	300.605	2070.1	614.298	0.719028	Metformin	1	3
82.9231	228.356	1437.21	399.578	84.3717	282.265	2199.83	577.748	0.765625	Metformin	1	3
82.6874	163.985	1235.05	306.333	76.6285	280.402	2303.03	745.741	0.762752	Metformin	1	3
75.4477	381.726	1505.49	560.007	80.4183	428.701	2656.9	850.487	0.844643	Metformin	1	3
78.3093	316.127	1561.25	513.865	82.0526	411.467	2715.92	806.754	0.850976	Metformin	1	3
63.4192	500.044	1922.97	955.023	65.4837	305.515	2143.4	942.567	0.738569	Metformin	1	3
80.5635	232.549	1542.69	433.256	81.5485	316.829	2586.42	739.936	0.792026	Metformin	1	3
77.9111	238.222	1463.63	487.194	78.0081	283.233	2216.03	706.176	0.73551	Metformin	1	3
80.7667	319.968	1576.29	499.737	81.7735	376.678	2630.01	775.199	0.84295	Metformin	1	3
78.4936	348.937	1837.92	573.867	72.5724	377.7	2850.42	1034.05	0.844406	Metformin	1	3
78.0007	300.944	1519	491.514	81.362	361.017	2561.11	763.274	0.820523	Metformin	2	3
79.6755	265.575	1896.06	501.254	79.2883	324.879	2801.63	828.964	0.805343	Metformin	2	3
81.3789	296.768	2019.08	555.315	74.2977	328.862	2741.22	939.956	0.812056	Metformin	2	3
77.3341	285.905	1709.71	564.908	75.811	314.369	2565.93	854.409	0.777162	Metformin	2	3
82.433	293.325	1754.83	510.701	76.9037	386.847	2796.14	926.527	0.846404	Metformin	2	3
71.6476	375.869	2066.5	772.008	68.9203	346.327	2511.55	1008.46	0.779502	Metformin	2	3
81.2725	259.492	1538.27	470.234	76.9953	284.508	2945.21	903.695	0.793767	Metformin	2	3
80.8274	309.978	1549.43	477.766	82.711	383.104	2611.46	760.752	0.848611	Metformin	2	3
79.5765	208.832	1626.57	467.592	76.0927	257.553	2481.12	789.004	0.738413	Metformin	2	3
80.7956	299.814	1719.44	488.66	81.6927	374.49	2580.29	772.927	0.834049	Metformin	2	3
74.9604	255.519	1570.36	548.62	75.1156	232.761	2223.96	729.59	0.723346	Metformin	2	3
81.3709	325.665	1460.96	486.129	83.7342	368.743	2547.02	723.106	0.844013	Metformin	2	3
80.6725	328.793	1582.45	515.725	81.4455	370.631	2626.61	779.359	0.82557	Metformin	2	3
73.8645	421.075	1687.68	687.135	73.3548	315.817	2219.84	821.565	0.783428	Metformin	2	3
78.8385	251.648	1454.05	438.937	81.4122	322.682	2310.62	692.269	0.795728	Metformin	2	3
82.445	221.138	1547.13	410.859	76.8859	285.4	2571.68	807.457	0.772012	Metformin	2	3
80.3483	229.61	1575.24	457.304	76.0816	239.635	2478.03	778.109	0.731281	Metformin	2	3
79.084	225.723	1231.97	400.905	83.7135	316.754	2268.72	623.051	0.748278	Metformin	2	3
77.6234	252.424	1618.25	516.293	73.155	273.936	2549.88	881.753	0.758263	Metformin	2	3
80.2808	266.55	1656.78	490.197	77.1934	324.817	2705.37	865.131	0.797881	Metformin	2	3
63.671	666.255	1990.28	1025.32	61.3851	361.781	2233.21	1077.77	0.784868	Metformin	2	3
80.7251	279.659	1431.46	450.888	81.8432	351.086	2527.23	741.163	0.829783	Metformin	2	3
80.6458	258.345	1754.54	488.522	74.1583	332.129	2791.32	957.071	0.824916	Metformin	2	3
73.5277	278.417	1657.85	593.392	74.5693	282.386	2509.7	849.811	0.731885	Metformin	2	3
80.4797	273.695	1897.25	525.143	77.0201	334.242	2618.02	853.571	0.786628	Metformin	2	3
79.7455	264.032	1782.15	505.938	74.9631	325.276	2892.69	953.627	0.793716	Metformin	2	3
79.4489	266.975	1476.78	475.742	77.8647	312.9	2446.5	782.316	0.787572	Metformin	2	3
80.6231	273.66	1663.48	494.398	78.263	330.625	2600.02	821.195	0.800463	Metformin	2	3
78.7128	307.779	1388.77	466.793	82.2159	387.251	2524.23	764.332	0.850295	Metformin	2	3
79.9008	243.023	1453.2	457.059	81.8214	287.751	2256.73	642.656	0.746992	Metformin	2	3
77.3725	259.518	1586.63	529.134	76.8914	282.457	2221.17	727.558	0.716267	Metformin	2	3
78.1467	316.575	1938.41	591.993	69.1736	419.591	2969.06	1182.16	0.805722	Metformin	2	3
70.547	397.523	1491.99	664.142	74.8784	284.525	1896.45	691.838	0.741312	Metformin	2	3
68.5288	458.474	1747.7	803.613	65.692	345.707	2266.98	981.098	0.783598	Metformin	2	3
94.2997	52.7423	1187.4	113.428	70.5238	411.908	2747.63	1081.31	0.726288	Metformin	2	3
81.528	228.263	1538.84	438.345	80.0002	297.291	2415.61	716.016	0.740149	Metformin	2	3
81.1877	270.839	1896.38	530.687	74.8127	349.185	2772.96	966.7	0.801292	Metformin	2	3
78.6127	206.819	1323.64	402.323	82.7249	293.222	2369.82	641.72	0.746349	Metformin	2	3
81.2755	231.812	1567.75	447.406	79.6072	351.01	2612.99	804.942	0.779862	Metformin	2	3
80.3929	256.176	1445.55	448.775	81.3059	317.898	2443.94	709.681	0.773852	Metformin	2	3
72.4351	327.132	1763.49	669.705	63.1962	363.849	2328.31	1063.6	0.778447	Metformin	2	3
81.8043	255.629	1541.15	445.986	80.7978	306.697	2335.23	704.672	0.786952	Metformin	2	3
83.0709	280.858	2042.16	526.511	80.7629	379.144	2945.31	844.587	0.815236	Metformin	2	3
80.8369	269.615	1848.09	517.39	77.2861	388.731	2680.27	898.908	0.809904	Metformin	2	3
69.0207	322.367	1634.31	697.163	69.0818	298.531	1999.21	819.266	0.755792	Metformin	2	3
81.4732	273.544	1603.49	456.787	81.7934	353.008	2630.86	760.464	0.827811	Metformin	2	3
81.4829	254.717	1569.2	430.26	82.1871	321.003	2517.99	706.389	0.801692	Metformin	2	3
81.7754	222.842	1459.7	406.212	80.8818	283.263	2435.54	691.048	0.774505	Metformin	2	3
78.9959	264.995	1700.21	521.168	76.9447	291.951	2447.82	789.802	0.748018	Metformin	2	3
69.9852	287.147	1669.74	654.56	66.1141	303.485	2170.8	934.939	0.739333	Metformin	2	3
82.4094	228.312	1550.08	423.441	79.7495	265.862	2503.26	717.718	0.765398	Metformin	2	3
80.0953	347.283	2154.92	587.357	77.4627	387.281	2913.08	946.223	0.839249	Metformin	2	3
79.2323	242.262	1544.58	430.407	80.3913	302.278	2425.91	702.061	0.791411	Metformin	2	3
79.3938	222.771	1481.05	458.667	81.7068	246.025	2076.61	579.624	0.700908	Metformin	2	3
80.5858	241.083	1381.86	433.96	80.9268	289.032	2238.45	661.095	0.753047	Metformin	2	3
80.3061	255.449	1781.56	503.239	75.8275	296.874	2561.49	840.334	0.765163	Metformin	2	3
84.599	252.964	1460.12	420.163	82.9188	298.862	2281.48	648.036	0.790911	Metformin	2	3
82.3148	217.428	1356.42	391.032	79.2703	261.727	2214.18	670.165	0.749066	Metformin	2	3
81.7455	223.923	1336.96	398.635	84.0385	254.778	2012.82	531.401	0.708029	Metformin	2	3
79.0461	322.764	1341.62	452.67	84.1351	383.074	2584.6	723.87	0.849367	Metformin	2	3
80.9111	300.664	1439.21	484.67	82.994	363.269	2670.21	738.985	0.829814	Metformin	2	3
76.5073	314.968	1496.63	506.555	81.7911	383.374	2685.53	793.661	0.848248	Metformin	2	3
83.0308	248.88	1677.51	449.299	72.1038	363.741	2924.4	1043.26	0.791077	Metformin	2	3
79.4854	208.912	1566.89	409.984	82.8213	293.076	2294.4	633.284	0.753318	Metformin	3	3
79.7859	238.484	1471.3	460.858	81.7433	274.751	2158.04	619.184	0.7187	Metformin	3	3
82.5743	188.693	1211.96	338.154	81.1725	286.253	2531.79	691.096	0.748369	Metformin	3	3
79.3477	274.707	2027.1	589.603	73.4206	358.922	2780.15	989.608	0.750396	Metformin	3	3
80.9926	273.664	1477.08	464.589	81.9734	304.213	2536.89	697.551	0.741088	Metformin	3	3
81.5049	328.984	1698.86	531.339	78.0711	348.817	2477.09	810.482	0.80194	Metformin	3	3
80.681	240.984	1705.3	475.508	76.9063	269.362	2596.59	797.298	0.721673	Metformin	3	3
80.0738	239.431	1424.04	425.092	79.1255	279.638	2392.53	711.695	0.711193	Metformin	3	3
79.2657	232.506	1463.26	452.343	77.6522	270.081	2560.53	781.963	0.718612	Metformin	3	3
79.8264	222.73	1337.2	426.192	83.2368	287.948	2196.54	600.256	0.67685	Metformin	3	3
79.3261	243.683	1520.68	477.525	79.0723	309.145	2680.87	790.764	0.712535	Metformin	3	3
80.9713	196.733	1313.71	371.528	81.7953	270.73	2288.49	629.376	0.70597	Metformin	3	3
79.6505	328.978	1772.31	563.409	73.7302	375.419	2663.33	965.081	0.813208	Metformin	3	3
81.4095	202.687	1291.42	393.921	82.9725	244.479	2230.41	588.62	0.714465	Metformin	3	3
80.2841	261.534	1578.56	462.866	82.3534	331.043	2596.83	723.905	0.781115	Metformin	3	3
79.8684	294.613	1720.16	529.573	77.5179	327.533	2502.01	812.009	0.758905	Metformin	3	3
80.9046	280.604	1656.19	489.518	79.1522	326.819	2774.03	819.879	0.793108	Metformin	3	3
79.139	230.697	1410.41	454.193	79.8591	280.613	2274.58	694.094	0.70962	Metformin	3	3
81.4573	248.783	1489.43	450.71	82.0833	270.116	2093.7	593.985	0.735716	Metformin	3	3
80.1645	264.048	1645.49	513.865	81.6049	264.877	2277.28	637.34	0.713043	Metformin	3	3
77.7881	386.927	2047.57	644.886	74.3667	428.7	2780.11	1010.87	0.850783	Metformin	3	3
87.3868	121.347	1311.08	255.929	75.3261	300.313	2782.75	897.873	0.71306	Metformin	3	3
87.3316	152.388	1507.64	279.127	74.9936	361.243	2795.94	964.698	0.801897	Metformin	3	3
81.5517	233.75	1393.3	416.054	82.3413	254.853	2179.48	594.382	0.73981	Metformin	3	3
83.8629	245.724	1946.16	459.592	72.8693	264.588	2739.77	929.534	0.752673	Metformin	3	3
80.8635	262.018	1677.97	487.384	69.6046	294.641	2434.92	946.185	0.779276	Metformin	3	3
79.8788	258.369	1998.08	532.519	77.3539	318.662	2890.53	924.991	0.789093	Metformin	3	3
77.3566	314.323	2003.98	571.165	78.9955	421.44	3198.95	976.045	0.820798	Metformin	3	3
81.0834	314.011	1848.07	545.765	78.4384	406.136	2679.94	885.232	0.838519	Metformin	3	3
84.2794	156.116	1174.11	298.438	80.2982	314.021	2390.98	728.851	0.73818	Metformin	3	3
79.3246	294.082	1611.66	516.381	79.3217	320.732	2504.17	783.499	0.766691	Metformin	3	3
80.0992	239.152	1481.34	451.496	81.142	259.196	2268.2	651.726	0.719949	Metformin	3	3
81.013	224.952	1370.72	377.869	81.836	306.348	2574.54	720.935	0.804142	Metformin	3	3
79.9366	314.658	2067.24	584.002	76.4378	384.973	2676.67	918.266	0.819338	Metformin	3	3
78.193	369.937	1788.94	602.53	72.2371	371.952	2873.79	1045.78	0.778828	Metformin	3	3
79.1739	299.884	1791.36	564.369	76.0731	334.137	2616.95	875.775	0.769	Metformin	3	3
78.9712	311.084	1972.78	561.19	72.5565	457.572	3057.14	1139.88	0.838786	Metformin	3	3
77.2451	328.192	1879.96	568.082	75.9522	403.859	3223.81	998.412	0.837545	Metformin	3	3
77.9436	304.195	1880.18	556.634	73.1222	359.816	2992.76	1056.28	0.831012	Metformin	4	3
83.2225	220.6	1413.52	396.74	81.3174	271.286	2203.33	634.464	0.749255	Metformin	4	3
81.0402	232.734	1554.61	451.373	78.402	326.565	2511.81	792.916	0.7625	Metformin	4	3
80.0558	233.918	1709.94	495.544	74.7426	305.209	2676.9	891.142	0.759649	Metformin	4	3
81.8946	215.919	1486.27	400.76	81.3511	262.41	2264.99	634.768	0.742761	Metformin	4	3
82.2418	229.819	1634	430.431	77.4536	285.314	2552.74	790.982	0.773584	Metformin	4	3
80.2218	254.198	1641.6	480.57	77.8877	307.661	2454.08	783.104	0.779059	Metformin	4	3
82.2601	222.347	1436.68	398.225	78.5716	279.286	2473.56	756.142	0.755955	Metformin	4	3
80.545	233.59	1441.29	435.708	80.9334	281.612	2128.46	639.615	0.741752	Metformin	4	3
81.6213	236.782	1603.55	425.184	79.4754	286.674	2514.09	750.439	0.777497	Metformin	4	3
80.292	262.082	1790.76	499.217	73.5718	356.834	2935.66	1024.58	0.77386	Metformin	4	3
80.5888	210.499	1326.86	402.301	80.6921	254.188	2106.04	616.646	0.704654	Metformin	4	3
81.3088	314.322	1829.49	548.9	73.4861	370.023	2940.64	1036.81	0.829649	Metformin	4	3
79.6256	314.631	1816.47	548.275	72.4259	385.214	3011.41	1103.86	0.774172	Metformin	4	3
81.576	187.182	1287.67	360.447	83.7817	262.387	2458.36	619.923	0.730617	Metformin	4	3
81.8984	236.316	1485.4	421.426	80.7889	272.145	2303.78	666.854	0.743793	Metformin	4	3
78.3998	248.276	1611.89	475.154	76.6886	286.957	2631.58	829.521	0.763989	Metformin	4	3
82.0742	218.908	1394.63	397.693	82.2814	249.476	2181.97	592.083	0.732662	Metformin	4	3
79.367	220.275	1604.45	446.608	78.2121	317.989	2641.74	822.175	0.753943	Metformin	4	3
80.1414	254.004	1555.21	491.257	82.3197	240.211	2008.63	557.283	0.693904	Metformin	4	3
82.4126	228.926	1692.29	423.267	77.7093	271.828	2637.84	791.547	0.780642	Metformin	4	3
79.3357	312.424	2129.26	599.325	75.8194	383.914	3217.3	1052.86	0.767608	Metformin	4	3
79.3146	300.059	1866.36	554.929	70.817	375.555	2898.51	1098.08	0.825481	Metformin	5	3
80.3284	276.118	1752.96	520.993	78.133	349.753	2691.73	873.475	0.792865	Metformin	5	3
76.0326	207.944	1888.63	572.04	66.6593	151.566	2839.04	1051.86	0.808001	Metformin	5	3
70.3878	376.07	1704.47	731.497	74.1317	234.06	1936.54	674.966	0.727626	Metformin	5	3
75.7336	272.712	1677.14	569.733	72.0597	290.434	2629.4	950.89	0.775934	Metformin	5	3
78.1618	273.805	1776.82	548.375	73.3577	329.617	2737.76	967.315	0.770888	Metformin	5	3
80.8209	204.691	1996.62	516.331	69.0192	314.814	3212.55	1185.18	0.776419	Metformin	5	3
84.9264	175.032	1713	372.674	71.1423	332.641	2733.22	1019.98	0.692648	Metformin	5	3
81.0137	281.12	2049.29	553.017	76.7543	334.507	2741.63	907.595	0.792916	Metformin	5	3
77.733	391.229	1710.73	607.869	77.289	387.808	2692.49	887.929	0.834327	Metformin	5	3
72.5719	494.952	1972.11	879.188	74.606	244.226	1825.38	646.307	0.65287	Metformin	5	3
80.5958	271.048	1749.37	520.255	75.7011	321.134	2710.31	893.815	0.781372	Metformin	5	3
78.2334	246.736	1632.76	496.682	73.1219	303.415	2796.02	969.079	0.769606	Metformin	5	3
84.7862	168.378	1428.59	324.111	73.1885	321.955	2766.05	967.336	0.779249	Metformin	5	3
78.0648	265.784	1822.09	546.015	74.1578	349.802	2856.42	986.335	0.753464	Metformin	5	3
79.8454	246.4	1757.98	516.776	76.7684	285.425	2507.12	815.232	0.731444	Metformin	5	3
77.6764	363.42	2037.26	605.57	75.8875	459.778	3223.97	1092.43	0.822958	Metformin	5	3
79.0888	281.776	1998.93	586.819	73.7417	377.597	2985.75	1042.71	0.758147	Metformin	5	3
79.6312	251.808	2078.44	572.185	69.7199	330.552	2956.03	1110.68	0.766907	Metformin	5	3
77.5763	261.726	1776.25	548.232	73.4307	308.894	2632.61	920.681	0.740531	Metformin	5	3
78.8975	269.407	1875.42	552.64	71.1471	295.414	2910.1	1058.51	0.762346	Metformin	5	3
80.4617	256.72	1649.87	465.702	77.449	347.255	2622.49	848.967	0.777079	Metformin	5	3
80.8207	287.945	1918.79	553.677	74.0844	322.563	2688.96	930.066	0.7599	Metformin	5	3
84.027	174.106	1407.23	352.366	76.0689	265.539	2494.37	807.319	0.724521	Metformin	5	3
83.698	224.862	1372.18	383.866	83.169	289.803	2584.44	677.941	0.742531	Metformin	5	3
81.4826	229.785	1831.69	484.806	77.244	304.358	2623.65	829.671	0.742883	Metformin	5	3
78.7716	259.543	1769.45	529.365	71.5862	297.267	2925.14	1037.41	0.751254	Metformin	5	3
79.4108	272.833	1941.51	557.759	72.9713	279.62	2656.7	917.26	0.74522	Metformin	5	3
79.7039	358.242	1906.77	576.329	78.4786	395.901	2884.71	924.882	0.836659	Metformin	5	3
79.484	257.809	1622.51	482.878	76.9254	339.116	2717.66	889.399	0.793881	Metformin	5	3
78.0936	263.436	1942.75	555.547	71.0361	360.961	2671.34	1017.94	0.810646	Metformin	5	3
74.8794	292.737	1689	598.694	69.9319	302.31	2416.21	931.606	0.747695	Metformin	5	3
79.3897	310.723	2249.39	631.722	70.5523	426.517	3060.22	1178.69	0.816004	Metformin	5	3
80.334	363.108	2161.43	643.058	76.1599	367.227	2863.03	951.305	0.847438	Metformin	5	3
77.6562	313.458	1763.16	565.864	74.292	381.001	2875.49	1009.16	0.771012	Metformin	5	3
79.3731	253.8	1627.99	501.018	76.7908	284.255	2444.91	801.629	0.732292	Metformin	5	3
77.391	366.37	2788.12	729.82	73.8996	480.711	3242.18	1180.2	0.787325	Metformin	5	3
78.0427	252.938	1609.87	503.709	74.2234	283.854	2486.87	844.732	0.735331	Metformin	5	3
75.0308	257.321	1775.54	573.963	72.6905	287.211	2461.45	874.723	0.721178	Metformin	5	3
78.7979	230.852	1645.36	485.72	72.5149	300.483	2864.1	1004.07	0.760927	Metformin	5	3
77.2312	289.669	2071.09	625.482	70.1567	309.581	2883.75	1069.71	0.772452	Metformin	5	3

## Sheet: 5E-OMI index
OMI index	Group	Fish	Repeat
0.935233	Control	1	1
1.18584	Control	1	1
1.11259	Control	1	1
1.20137	Control	1	1
1.10248	Control	1	1
1.1616	Control	1	1
0.945206	Control	1	1
1.10829	Control	1	1
0.90695	Control	1	1
1.34578	Control	1	1
1.09593	Control	1	1
0.752205	Control	1	1
1.14218	Control	1	1
1.04954	Control	1	1
1.24138	Control	1	1
1.21574	Control	1	1
0.867924	Control	1	1
1.08157	Control	1	1
1.00827	Control	1	1
0.80414	Control	1	1
1.11236	Control	1	1
1.04402	Control	1	1
1.16374	Control	1	1
1.36863	Control	1	1
1.20278	Control	1	1
1.08455	Control	1	1
1.07989	Control	1	1
1.23469	Control	1	1
1.08	Control	1	1
1.23198	Control	1	1
1.20913	Control	1	1
0.825917	Control	1	1
1.21705	Control	1	1
1.0486	Control	1	1
0.931237	Control	1	1
0.938183	Control	1	1
0.83197	Control	1	1
1.01767	Control	1	1
0.874636	Control	1	1
0.89031	Control	1	1
1.18424	Control	1	1
0.817368	Control	1	1
1.20602	Control	1	1
1.1367	Control	1	1
1.23674	Control	1	1
0.934488	Control	1	1
1.03391	Control	1	1
1.18748	Control	1	1
1.33276	Control	1	1
1.56536	Control	1	1
0.859391	Control	1	1
1.04206	Control	1	1
1.12222	Control	1	1
1.18515	Control	1	1
1.08183	Control	1	1
0.995765	Control	1	1
1.17654	Control	1	1
1.3037	Control	1	1
1.16212	Control	1	1
1.28634	Control	1	1
1.55701	Control	1	1
1.00112	Control	1	1
0.466367	Control	1	1
1.24614	Control	1	1
1.18924	Control	1	1
0.224012	Control	1	1
1.19972	Control	1	1
0.968234	Control	1	1
0.837748	Control	1	1
0.582238	Control	1	1
0.743396	Control	1	1
1.7115	Control	1	1
1.17973	Control	1	1
0.941491	Control	1	1
1.15072	Control	2	1
1.28441	Control	2	1
1.06826	Control	2	1
1.31105	Control	2	1
1.33426	Control	2	1
1.84338	Control	2	1
1.28482	Control	2	1
1.13595	Control	2	1
1.14256	Control	2	1
1.1185	Control	2	1
0.939703	Control	2	1
1.24959	Control	2	1
0.981132	Control	2	1
1.21855	Control	2	1
1.36482	Control	2	1
1.12699	Control	2	1
1.17819	Control	2	1
1.40467	Control	2	1
1.07581	Control	2	1
0.94142	Control	2	1
1.22746	Control	2	1
1.0409	Control	2	1
1.12587	Control	2	1
1.22239	Control	2	1
1.26716	Control	2	1
1.08827	Control	2	1
0.946769	Control	2	1
1.30641	Control	2	1
1.34665	Control	2	1
1.38385	Control	2	1
1.15419	Control	2	1
1.49978	Control	2	1
1.60803	Control	2	1
1.19301	Control	2	1
1.23761	Control	2	1
1.00165	Control	2	1
1.13654	Control	2	1
1.29333	Control	2	1
1.08008	Control	2	1
1.23038	Control	2	1
1.54331	Control	2	1
1.19657	Control	2	1
1.13872	Control	2	1
1.27652	Control	2	1
1.08319	Control	2	1
0.948798	Control	2	1
1.48603	Control	2	1
1.2972	Control	2	1
1.21826	Control	2	1
1.22863	Control	2	1
1.22457	Control	2	1
1.08011	Control	2	1
1.0054	Control	3	1
0.902627	Control	3	1
1.01503	Control	3	1
1.58507	Control	3	1
1.31271	Control	3	1
1.18181	Control	3	1
0.766464	Control	3	1
0.938816	Control	3	1
1.31479	Control	3	1
0.887688	Control	3	1
1.10603	Control	3	1
1.2441	Control	3	1
1.24274	Control	3	1
1.2938	Control	3	1
1.15918	Control	3	1
1.18378	Control	3	1
0.635925	Control	3	1
1.29843	Control	3	1
1.35007	Control	3	1
1.18741	Control	3	1
0.991988	Control	3	1
1.00267	Control	3	1
0.853264	Control	3	1
1.15533	Control	3	1
0.923616	Control	3	1
0.81778	Control	3	1
0.884562	Control	3	1
1.05546	Control	3	1
1.15811	Control	3	1
0.968634	Control	3	1
0.921973	Control	3	1
1.00596	Control	3	1
1.02583	Control	3	1
0.713487	Control	3	1
0.949533	Control	3	1
0.860441	Control	3	1
0.873487	Control	3	1
1.04372	Control	3	1
1.06329	Control	3	1
0.867992	Control	3	1
0.791965	Control	3	1
0.87362	Control	3	1
1.24023	Control	3	1
1.1417	Control	3	1
1.04068	Control	3	1
0.872132	Control	3	1
0.964204	Control	3	1
0.636796	Control	3	1
0.942373	Control	3	1
1.50514	Control	3	1
2.02291	Control	3	1
1.09453	Control	3	1
0.89329	Control	3	1
1.00272	Control	3	1
0.496815	Control	3	1
0.880846	Control	3	1
1.36382	Control	3	1
0.880761	Control	3	1
1.09993	Control	3	1
0.948121	Control	3	1
0.988005	Control	3	1
1.02302	Control	3	1
0.886911	Control	3	1
0.758185	Control	3	1
1.18503	Control	3	1
0.661527	Control	3	1
0.960552	Control	3	1
0.878055	Control	3	1
1.26162	Control	3	1
1.12496	Control	3	1
1.13543	Control	3	1
1.10009	Control	3	1
1.09598	Control	3	1
1.22883	Control	3	1
0.322032	Control	3	1
1.24156	Control	3	1
1.23395	Control	3	1
1.00098	Control	3	1
2.13556	Control	3	1
1.31418	Control	3	1
1.02309	Control	3	1
1.13464	Control	3	1
1.1511	Control	3	1
1.21943	Control	3	1
1.0928	Control	3	1
1.37781	Control	3	1
1.48333	Control	3	1
1.20217	Control	3	1
0.314545	Control	3	1
1.21395	Control	3	1
1.45535	Control	3	1
1.23852	Control	3	1
1.08479	Control	3	1
1.12974	Control	3	1
1.04414	Control	3	1
1.51279	Control	3	1
1.2262	Control	3	1
1.15194	Control	3	1
1.07076	Control	3	1
0.836808	Control	4	1
1.07539	Control	4	1
1.27327	Control	4	1
0.920454	Control	4	1
0.559581	Control	4	1
0.993261	Control	4	1
1.0968	Control	4	1
0.850337	Control	4	1
1.03981	Control	4	1
1.12649	Control	4	1
1.15401	Control	4	1
0.948594	Control	4	1
1.20727	Control	4	1
1.0907	Control	4	1
1.13439	Control	4	1
1.08573	Control	4	1
0.817128	Control	4	1
0.822565	Control	4	1
1.05026	Control	4	1
1.3881	Control	4	1
1.10243	Control	4	1
1.2602	Control	4	1
0.858144	Control	4	1
1.21499	Control	4	1
1.35772	Control	4	1
1.1498	Control	4	1
1.30842	Control	4	1
1.16435	Control	4	1
1.11049	Control	4	1
1.03261	Control	4	1
1.11317	Control	4	1
0.835303	Control	4	1
1.21816	Control	4	1
1.1511	Control	4	1
1.04555	Control	4	1
1.13344	Control	4	1
1.14367	Control	4	1
1.11707	Control	4	1
0.931835	Control	4	1
1.12922	Control	4	1
1.03577	Control	4	1
1.20703	Control	4	1
1.31645	Control	4	1
1.12107	Metformin	1	1
1.04848	Metformin	1	1
1.15823	Metformin	1	1
1.19216	Metformin	1	1
1.31149	Metformin	1	1
1.11037	Metformin	1	1
1.12073	Metformin	1	1
1.0341	Metformin	1	1
1.12429	Metformin	1	1
1.1139	Metformin	1	1
1.28766	Metformin	1	1
1.42026	Metformin	1	1
1.0336	Metformin	1	1
1.17632	Metformin	1	1
1.01553	Metformin	1	1
1.17889	Metformin	1	1
0.973824	Metformin	1	1
1.30329	Metformin	1	1
0.63945	Metformin	1	1
1.07387	Metformin	1	1
1.20614	Metformin	1	1
1.18405	Metformin	1	1
1.0516	Metformin	1	1
1.23853	Metformin	1	1
1.27332	Metformin	1	1
1.1293	Metformin	1	1
1.06809	Metformin	1	1
1.15669	Metformin	1	1
1.02871	Metformin	1	1
0.963172	Metformin	1	1
1.01507	Metformin	1	1
1.09155	Metformin	1	1
0.981596	Metformin	1	1
1.38266	Metformin	1	1
1.27839	Metformin	1	1
1.23046	Metformin	2	1
1.27498	Metformin	2	1
1.22823	Metformin	2	1
1.19863	Metformin	2	1
0.991882	Metformin	2	1
1.11098	Metformin	2	1
1.32954	Metformin	2	1
1.08692	Metformin	2	1
1.18281	Metformin	2	1
1.03396	Metformin	2	1
1.01052	Metformin	2	1
1.09227	Metformin	2	1
1.31173	Metformin	2	1
1.44105	Metformin	2	1
1.0118	Metformin	2	1
0.965086	Metformin	2	1
0.752969	Metformin	2	1
0.904879	Metformin	2	1
1.27197	Metformin	2	1
1.34772	Metformin	2	1
1.37013	Metformin	2	1
1.40317	Metformin	2	1
1.39599	Metformin	2	1
1.91566	Metformin	2	1
1.30986	Metformin	2	1
-0.689288	Metformin	2	1
1.34799	Metformin	2	1
1.46819	Metformin	2	1
2.8141	Metformin	2	1
1.26394	Metformin	2	1
1.14568	Metformin	2	1
1.18676	Metformin	2	1
0.980564	Metformin	2	1
1.22099	Metformin	2	1
1.25606	Metformin	2	1
0.936443	Metformin	2	1
1.06465	Metformin	3	1
1.27499	Metformin	3	1
1.19358	Metformin	3	1
0.9256	Metformin	3	1
1.06763	Metformin	3	1
1.11677	Metformin	3	1
0.956029	Metformin	3	1
1.19795	Metformin	3	1
1.17494	Metformin	3	1
1.14518	Metformin	3	1
0.807033	Metformin	3	1
1.21881	Metformin	3	1
1.14872	Metformin	3	1
0.880456	Metformin	3	1
1.14143	Metformin	3	1
1.1835	Metformin	3	1
1.14869	Metformin	3	1
1.16407	Metformin	3	1
1.18234	Metformin	3	1
1.58572	Metformin	3	1
0.964917	Metformin	3	1
1.27949	Metformin	3	1
1.30687	Metformin	3	1
1.34603	Metformin	3	1
1.00098	Metformin	3	1
1.18416	Metformin	3	1
1.06815	Metformin	3	1
0.66743	Metformin	3	1
1.14929	Metformin	3	1
1.17555	Metformin	3	1
1.54519	Metformin	3	1
1.17378	Metformin	3	1
1.18773	Metformin	3	1
1.54618	Metformin	3	1
1.22859	Metformin	3	1
1.11467	Metformin	3	1
1.18578	Metformin	3	1
1.56572	Metformin	3	1
1.15751	Metformin	3	1
0.97885	Metformin	3	1
0.986856	Metformin	3	1
1.21993	Metformin	3	1
1.24002	Metformin	3	1
1.14713	Metformin	3	1
1.25594	Metformin	3	1
1.06237	Metformin	3	1
1.48388	Metformin	3	1
1.32707	Metformin	3	1
1.16854	Metformin	3	1
0.998663	Metformin	3	1
1.1157	Metformin	3	1
1.11183	Metformin	3	1
1.35065	Metformin	3	1
1.13089	Metformin	3	1
1.25554	Metformin	3	1
1.4373	Metformin	3	1
1.20236	Metformin	3	1
1.0025	Metformin	3	1
0.993822	Metformin	3	1
1.24297	Metformin	3	1
1.13781	Metformin	3	1
1.21375	Metformin	3	1
1.563	Metformin	3	1
1.17169	Metformin	3	1
1.09382	Metformin	3	1
1.1316	Metformin	3	1
0.582538	Metformin	3	1
1.24343	Metformin	4	1
1.12896	Metformin	4	1
0.683236	Metformin	4	1
0.712788	Metformin	4	1
1.17841	Metformin	4	1
0.901516	Metformin	4	1
1.14696	Metformin	4	1
0.805472	Metformin	4	1
1.36582	Metformin	4	1
1.35216	Metformin	4	1
0.823823	Metformin	4	1
0.932832	Metformin	4	1
0.934927	Metformin	4	1
0.841137	Metformin	4	1
0.742265	Metformin	4	1
1.06541	Metformin	4	1
0.824287	Metformin	4	1
0.963631	Metformin	4	1
0.884877	Metformin	4	1
0.958768	Metformin	4	1
1.51403	Metformin	4	1
0.868911	Metformin	4	1
0.834465	Metformin	4	1
0.90529	Metformin	4	1
1.22742	Metformin	4	1
1.16756	Metformin	4	1
0.697193	Metformin	4	1
0.948995	Metformin	4	1
0.840685	Metformin	4	1
0.926622	Metformin	4	1
0.759226	Metformin	4	1
0.917425	Metformin	4	1
0.880788	Metformin	4	1
0.787205	Metformin	4	1
0.922687	Metformin	4	1
1.00556	Metformin	4	1
1.06545	Metformin	4	1
0.969338	Metformin	4	1
1.06437	Metformin	4	1
1.58056	Metformin	4	1
1.29806	Metformin	4	1
0.823129	Metformin	4	1
0.958309	Metformin	4	1
0.833209	Metformin	4	1
0.916838	Metformin	4	1
1.00918	Metformin	4	1
0.988155	Metformin	4	1
1.29539	Metformin	4	1
1.23648	Metformin	4	1
0.99157	Metformin	4	1
1.85167	Metformin	4	1
0.975834	Metformin	4	1
1.1146	Metformin	4	1
1.56075	Metformin	4	1
1.18849	Metformin	4	1
1.09622	Metformin	4	1
1.0891	Metformin	4	1
0.968214	Metformin	4	1
1.04403	Metformin	4	1
1.03376	Metformin	4	1
1.60607	Metformin	4	1
0.891566	Metformin	4	1
0.996462	Metformin	4	1
0.886765	Metformin	4	1
0.787253	Metformin	4	1
0.839443	Control	1	2
0.730675	Control	1	2
0.794452	Control	1	2
1.28859	Control	1	2
0.664218	Control	1	2
0.795038	Control	1	2
0.561847	Control	1	2
0.729017	Control	1	2
1.03872	Control	1	2
1.01075	Control	1	2
1.07058	Control	1	2
0.818965	Control	1	2
0.886495	Control	1	2
0.846147	Control	1	2
0.751912	Control	1	2
0.945802	Control	1	2
1.06496	Control	1	2
0.764333	Control	1	2
0.788829	Control	1	2
1.02126	Control	1	2
0.981812	Control	1	2
1.01692	Control	1	2
1.05381	Control	1	2
0.672624	Control	1	2
1.37755	Control	1	2
0.92989	Control	1	2
0.998478	Control	1	2
1.06724	Control	1	2
0.985744	Control	1	2
0.712376	Control	1	2
0.654484	Control	1	2
0.921256	Control	1	2
0.904838	Control	1	2
0.554954	Control	1	2
0.655322	Control	1	2
0.859566	Control	1	2
0.931179	Control	1	2
0.830784	Control	1	2
0.981008	Control	1	2
0.820586	Control	1	2
1.02216	Control	1	2
0.590498	Control	1	2
0.755114	Control	1	2
0.989346	Control	1	2
0.633078	Control	1	2
0.963457	Control	1	2
0.979177	Control	1	2
0.873243	Control	1	2
0.982193	Control	1	2
1.04671	Control	1	2
1.07594	Control	1	2
0.929407	Control	1	2
0.75121	Control	1	2
0.656892	Control	1	2
0.833315	Control	2	2
0.71307	Control	2	2
0.997292	Control	2	2
0.958711	Control	2	2
0.898736	Control	2	2
0.897972	Control	2	2
0.87799	Control	2	2
0.908113	Control	2	2
0.913058	Control	2	2
0.938695	Control	2	2
0.907598	Control	2	2
0.911057	Control	2	2
0.901874	Control	2	2
1.04038	Control	2	2
0.743761	Control	2	2
0.982872	Control	2	2
0.676575	Control	2	2
0.926087	Control	2	2
0.829439	Control	2	2
0.798894	Control	2	2
1.12949	Control	2	2
0.985824	Control	2	2
0.859908	Control	2	2
0.859961	Control	2	2
0.869053	Control	2	2
0.882436	Control	2	2
0.920376	Control	2	2
0.894229	Control	2	2
0.892798	Control	2	2
0.856011	Control	2	2
0.875347	Control	2	2
0.748676	Control	2	2
1.0013	Control	2	2
0.88421	Control	2	2
0.849751	Control	2	2
1.13345	Control	3	2
0.631641	Control	3	2
0.774014	Control	3	2
0.990141	Control	3	2
0.788532	Control	3	2
0.635908	Control	3	2
0.917561	Control	3	2
0.948643	Control	3	2
1.01454	Control	3	2
0.878532	Control	3	2
1.00632	Control	3	2
0.913594	Control	3	2
0.871609	Control	3	2
0.800213	Control	3	2
0.904816	Control	3	2
0.941603	Control	3	2
0.976171	Control	3	2
0.931306	Control	3	2
1.14737	Control	3	2
0.869054	Control	3	2
1.0313	Control	3	2
0.91049	Control	3	2
1.00529	Control	3	2
1.19815	Control	3	2
0.901904	Control	3	2
0.968533	Control	3	2
0.963884	Control	3	2
1.37862	Control	3	2
1.29177	Control	3	2
1.20824	Control	3	2
0.941257	Control	3	2
1.34595	Control	3	2
0.873463	Control	3	2
1.02171	Control	3	2
0.87022	Control	4	2
0.874949	Control	4	2
0.873893	Control	4	2
0.79699	Control	4	2
0.735721	Control	4	2
0.912841	Control	4	2
0.857045	Control	4	2
0.594167	Control	4	2
0.290517	Control	4	2
0.689763	Control	4	2
0.71343	Control	4	2
1.20039	Control	4	2
0.980939	Control	4	2
0.945915	Control	4	2
0.96154	Control	4	2
0.899527	Control	4	2
1.02859	Control	4	2
1.04887	Control	4	2
0.877053	Control	4	2
0.857666	Control	4	2
0.825705	Control	4	2
0.752434	Control	4	2
0.968978	Control	4	2
1.03006	Control	4	2
0.953422	Control	4	2
1.07119	Control	4	2
0.60435	Control	4	2
0.753315	Control	4	2
0.902437	Control	4	2
0.958095	Control	4	2
0.833322	Control	4	2
0.865984	Control	4	2
0.839593	Control	4	2
0.715427	Control	4	2
0.816699	Control	4	2
1.18134	Control	5	2
1.26137	Control	5	2
0.620461	Control	5	2
0.6115	Control	5	2
0.689993	Control	5	2
0.687888	Control	5	2
1.10772	Control	5	2
1.35152	Control	5	2
0.716969	Control	5	2
0.999251	Control	5	2
0.995104	Control	5	2
0.564437	Control	5	2
0.928147	Control	5	2
0.594153	Control	5	2
0.74046	Control	5	2
0.652426	Control	5	2
0.690403	Control	5	2
0.787875	Control	5	2
0.917415	Control	5	2
0.67596	Control	5	2
0.770646	Control	5	2
0.902166	Control	5	2
1.00125	Control	5	2
0.671716	Control	5	2
0.963278	Control	5	2
0.876228	Control	5	2
0.843391	Control	5	2
0.87389	Control	5	2
1.01986	Control	5	2
0.983086	Control	5	2
0.876033	Control	5	2
1.00674	Control	5	2
1.29288	Control	5	2
1.44134	Control	5	2
1.07892	Control	5	2
1.14435	Control	5	2
1.04734	Control	5	2
0.859136	Control	5	2
1.10063	Control	5	2
1.38032	Metformin	1	2
0.887825	Metformin	1	2
1.08332	Metformin	1	2
1.0865	Metformin	1	2
1.00925	Metformin	1	2
1.02844	Metformin	1	2
1.2365	Metformin	1	2
0.892014	Metformin	1	2
1.10798	Metformin	1	2
1.24307	Metformin	1	2
1.37442	Metformin	1	2
0.841957	Metformin	1	2
0.44626	Metformin	1	2
0.862088	Metformin	1	2
0.977131	Metformin	1	2
1.02813	Metformin	1	2
1.28776	Metformin	1	2
0.963527	Metformin	1	2
1.0073	Metformin	1	2
0.971693	Metformin	1	2
1.03204	Metformin	1	2
1.01361	Metformin	1	2
0.966874	Metformin	1	2
1.04344	Metformin	1	2
1.04046	Metformin	1	2
1.15295	Metformin	1	2
0.980612	Metformin	1	2
0.983548	Metformin	1	2
0.977625	Metformin	1	2
0.795826	Metformin	1	2
1.269	Metformin	1	2
0.862479	Metformin	1	2
1.16851	Metformin	1	2
0.69032	Metformin	1	2
0.968083	Metformin	1	2
0.802056	Metformin	1	2
0.878083	Metformin	1	2
0.624694	Metformin	1	2
1.01134	Metformin	1	2
1.20085	Metformin	1	2
0.454253	Metformin	1	2
1.10806	Metformin	1	2
1.20437	Metformin	1	2
0.928737	Metformin	1	2
1.16869	Metformin	1	2
1.12035	Metformin	1	2
0.818049	Metformin	1	2
1.16269	Metformin	1	2
0.858531	Metformin	1	2
1.21537	Metformin	1	2
0.855398	Metformin	1	2
0.604592	Metformin	1	2
1.05893	Metformin	1	2
0.9188	Metformin	1	2
0.922142	Metformin	1	2
0.920877	Metformin	1	2
0.823402	Metformin	1	2
0.872896	Metformin	1	2
0.628654	Metformin	1	2
1.03564	Metformin	1	2
0.878323	Metformin	1	2
1.06348	Metformin	1	2
0.988267	Metformin	1	2
0.803861	Metformin	2	2
0.8995	Metformin	2	2
1.09379	Metformin	2	2
0.912794	Metformin	2	2
1.38803	Metformin	2	2
0.903995	Metformin	2	2
0.905219	Metformin	2	2
1.1734	Metformin	2	2
1.15581	Metformin	2	2
0.910111	Metformin	2	2
1.32511	Metformin	2	2
1.02616	Metformin	2	2
0.887773	Metformin	2	2
1.15144	Metformin	2	2
1.0931	Metformin	2	2
0.980666	Metformin	2	2
0.797902	Metformin	2	2
0.758183	Metformin	2	2
0.901377	Metformin	2	2
1.14396	Metformin	2	2
0.927517	Metformin	2	2
0.920421	Metformin	2	2
1.04938	Metformin	2	2
0.878627	Metformin	2	2
0.795205	Metformin	2	2
1.05732	Metformin	2	2
1.15604	Metformin	2	2
0.932894	Metformin	2	2
0.997241	Metformin	2	2
0.921098	Metformin	2	2
0.84647	Metformin	2	2
0.889684	Metformin	2	2
1.09053	Metformin	2	2
1.07146	Metformin	2	2
1.0532	Metformin	2	2
1.05919	Metformin	2	2
1.04877	Metformin	2	2
0.737059	Metformin	2	2
1.44881	Metformin	2	2
1.05051	Metformin	2	2
1.3701	Metformin	2	2
1.03579	Metformin	2	2
1.12159	Metformin	2	2
0.975891	Metformin	2	2
0.526717	Metformin	3	2
0.921099	Metformin	3	2
0.801076	Metformin	3	2
0.792654	Metformin	3	2
0.91079	Metformin	3	2
0.871768	Metformin	3	2
1.29931	Metformin	3	2
0.87596	Metformin	3	2
1.09998	Metformin	3	2
0.788241	Metformin	3	2
0.980415	Metformin	3	2
0.987171	Metformin	3	2
0.976836	Metformin	3	2
0.829063	Metformin	3	2
0.937381	Metformin	3	2
1.00685	Metformin	3	2
0.94211	Metformin	3	2
0.917061	Metformin	3	2
0.541587	Metformin	3	2
1.00555	Metformin	3	2
1.07786	Metformin	3	2
0.941555	Metformin	3	2
0.762928	Metformin	3	2
1.04004	Metformin	3	2
0.981592	Metformin	3	2
0.94947	Metformin	3	2
0.931413	Metformin	3	2
1.25428	Metformin	3	2
1.05048	Metformin	3	2
1.1238	Metformin	3	2
1.78703	Metformin	3	2
1.17292	Metformin	3	2
1.12858	Metformin	3	2
1.08251	Metformin	3	2
1.02715	Metformin	3	2
1.04161	Metformin	3	2
2.03767	Metformin	3	2
1.36979	Metformin	3	2
0.963815	Metformin	3	2
0.98831	Metformin	3	2
0.941753	Metformin	3	2
1.04711	Metformin	3	2
0.941164	Metformin	3	2
1.0655	Metformin	3	2
1.31874	Metformin	3	2
0.999755	Metformin	3	2
1.37346	Metformin	4	2
1.09773	Metformin	4	2
0.825567	Metformin	4	2
1.65098	Metformin	4	2
1.97126	Metformin	4	2
0.900872	Metformin	4	2
1.43144	Metformin	4	2
0.629123	Metformin	4	2
1.4774	Metformin	4	2
1.64719	Metformin	4	2
0.821433	Metformin	4	2
1.05268	Metformin	4	2
0.926641	Metformin	4	2
1.26286	Metformin	4	2
0.888206	Metformin	4	2
0.992368	Metformin	4	2
1.15554	Metformin	4	2
0.800416	Metformin	4	2
0.885115	Metformin	4	2
0.841385	Metformin	4	2
1.03904	Metformin	4	2
0.952406	Metformin	4	2
0.807351	Metformin	4	2
1.00105	Metformin	4	2
1.00175	Metformin	4	2
1.88759	Metformin	4	2
0.96354	Metformin	4	2
1.28463	Metformin	4	2
1.09021	Metformin	4	2
0.954197	Metformin	4	2
1.63237	Metformin	4	2
1.48361	Metformin	4	2
1.32001	Metformin	4	2
1.13634	Metformin	5	2
1.44632	Metformin	5	2
1.08834	Metformin	5	2
0.973347	Metformin	5	2
0.827507	Metformin	5	2
0.908766	Metformin	5	2
1.48867	Metformin	5	2
1.26439	Metformin	5	2
0.92974	Metformin	5	2
1.16343	Metformin	5	2
1.00295	Metformin	5	2
0.82471	Metformin	5	2
1.0205	Metformin	5	2
0.970973	Metformin	5	2
1.10448	Metformin	5	2
0.802003	Metformin	5	2
0.883911	Metformin	5	2
0.841267	Metformin	5	2
0.804974	Metformin	5	2
0.970405	Metformin	5	2
0.733996	Metformin	5	2
0.897863	Metformin	5	2
0.907218	Metformin	5	2
1.14783	Metformin	5	2
0.973474	Metformin	5	2
0.971174	Metformin	5	2
1.29334	Metformin	5	2
1.07506	Metformin	5	2
1.71287	Metformin	5	2
1.13605	Metformin	5	2
1.0753	Metformin	5	2
0.694742	Metformin	5	2
1.05728	Metformin	5	2
0.923508	Metformin	5	2
0.702382	Metformin	5	2
0.848844	Metformin	5	2
1.19067	Metformin	5	2
1.13043	Metformin	5	2
1.29111	Metformin	5	2
1.37314	Metformin	5	2
1.38163	Metformin	5	2
1.19631	Metformin	5	2
1.03476	Metformin	5	2
1.04155	Control	1	3
0.93281	Control	1	3
0.847842	Control	1	3
0.973754	Control	1	3
0.821383	Control	1	3
0.810873	Control	1	3
0.878229	Control	1	3
0.846175	Control	1	3
1.10342	Control	1	3
1.01778	Control	1	3
1.08741	Control	1	3
0.96628	Control	1	3
0.822427	Control	1	3
0.862714	Control	1	3
1.04431	Control	1	3
1.04822	Control	1	3
1.15588	Control	1	3
0.893778	Control	1	3
1.01031	Control	1	3
0.89105	Control	1	3
0.835113	Control	1	3
0.823507	Control	1	3
0.802799	Control	1	3
1.03445	Control	1	3
0.832126	Control	2	3
0.897209	Control	2	3
0.946107	Control	2	3
0.867393	Control	2	3
0.859017	Control	2	3
0.802573	Control	2	3
0.960276	Control	2	3
0.869083	Control	2	3
0.773116	Control	2	3
0.789335	Control	2	3
0.733923	Control	2	3
1.19159	Control	2	3
1.11254	Control	2	3
0.886295	Control	2	3
0.706971	Control	2	3
0.821129	Control	2	3
0.981305	Control	2	3
0.608628	Control	2	3
0.701543	Control	2	3
0.872949	Control	2	3
0.493034	Control	2	3
0.699548	Control	2	3
0.507327	Control	2	3
0.886133	Control	2	3
0.685233	Control	2	3
0.357454	Control	2	3
0.520347	Control	2	3
1.06262	Control	2	3
0.706634	Control	2	3
1.03686	Control	2	3
0.981389	Control	2	3
0.976933	Control	2	3
0.844636	Control	2	3
0.853359	Control	2	3
0.953321	Control	2	3
0.895488	Control	2	3
0.800348	Control	3	3
0.995721	Control	3	3
0.867003	Control	3	3
0.845283	Control	3	3
0.818604	Control	3	3
1.1058	Control	3	3
1.25609	Control	3	3
0.893781	Control	3	3
1.0434	Control	3	3
0.760146	Control	3	3
0.935208	Control	3	3
0.166315	Control	3	3
1.24256	Control	3	3
0.766753	Control	3	3
0.794679	Control	3	3
0.884806	Control	3	3
0.398366	Control	3	3
0.855732	Control	3	3
0.856059	Control	3	3
0.969221	Control	3	3
0.836737	Control	3	3
0.887491	Control	3	3
1.00437	Control	3	3
0.969804	Control	3	3
0.721809	Control	3	3
0.933113	Control	3	3
0.830163	Control	3	3
0.709367	Control	3	3
0.798785	Control	3	3
0.783689	Control	3	3
0.928179	Control	3	3
0.65146	Control	3	3
0.855417	Control	3	3
1.0508	Control	3	3
0.774903	Control	3	3
0.560615	Control	3	3
0.64906	Control	3	3
0.580981	Control	3	3
0.795017	Control	3	3
0.834905	Control	3	3
0.50268	Control	3	3
0.683876	Control	3	3
0.885527	Control	3	3
1.08271	Control	3	3
0.535645	Control	3	3
0.605346	Control	3	3
0.44265	Control	3	3
1.02493	Control	3	3
0.719914	Control	3	3
0.560954	Control	3	3
0.734361	Control	3	3
0.757214	Control	3	3
0.986011	Control	3	3
1.15332	Control	3	3
0.812485	Control	3	3
0.699115	Control	3	3
0.89568	Control	3	3
1.06728	Control	3	3
0.901431	Control	3	3
0.784425	Control	3	3
0.627243	Control	3	3
0.796151	Control	3	3
0.604753	Control	3	3
0.601047	Control	3	3
0.476559	Control	3	3
0.723823	Control	3	3
0.677488	Control	3	3
0.75495	Control	3	3
0.81387	Control	3	3
0.564953	Control	3	3
0.765551	Control	3	3
0.743366	Control	3	3
0.19857	Control	3	3
0.958673	Control	3	3
0.812766	Control	3	3
0.880374	Control	4	3
1.07673	Control	4	3
0.758792	Control	4	3
0.802632	Control	4	3
1.01764	Control	4	3
0.957382	Control	4	3
0.846942	Control	4	3
0.797889	Control	4	3
0.963904	Control	4	3
0.998656	Control	4	3
0.9675	Control	4	3
0.757864	Control	4	3
0.329524	Control	4	3
0.840996	Control	4	3
0.747803	Control	4	3
0.991707	Control	4	3
0.963794	Control	4	3
0.993928	Control	4	3
0.625735	Control	4	3
0.755375	Control	4	3
0.695996	Control	4	3
0.823556	Control	4	3
0.495518	Control	4	3
0.790643	Control	4	3
0.975318	Control	4	3
0.955155	Control	4	3
0.655106	Control	4	3
0.814762	Control	4	3
1.03647	Control	4	3
0.88341	Control	4	3
1.04756	Control	4	3
0.924769	Control	4	3
0.917194	Metformin	1	3
0.15533	Metformin	1	3
1.18696	Metformin	1	3
1.04038	Metformin	1	3
0.866787	Metformin	1	3
0.910449	Metformin	1	3
0.815233	Metformin	1	3
0.751627	Metformin	1	3
0.642729	Metformin	1	3
0.718759	Metformin	1	3
0.917513	Metformin	1	3
0.725294	Metformin	1	3
0.864761	Metformin	1	3
0.963125	Metformin	1	3
0.957902	Metformin	1	3
0.556696	Metformin	1	3
0.67927	Metformin	1	3
0.405049	Metformin	1	3
0.875269	Metformin	1	3
0.999641	Metformin	1	3
0.877719	Metformin	1	3
0.959077	Metformin	1	3
0.893053	Metformin	1	3
0.468936	Metformin	1	3
1.16045	Metformin	1	3
1.04748	Metformin	1	3
1.01562	Metformin	1	3
0.990509	Metformin	1	3
1.27779	Metformin	1	3
0.486105	Metformin	1	3
0.971019	Metformin	1	3
0.658113	Metformin	1	3
0.72748	Metformin	1	3
0.66834	Metformin	1	3
0.893797	Metformin	1	3
0.893168	Metformin	1	3
0.890045	Metformin	1	3
0.885792	Metformin	1	3
0.843095	Metformin	1	3
0.805318	Metformin	1	3
0.882639	Metformin	1	3
0.715644	Metformin	1	3
0.918024	Metformin	1	3
0.943331	Metformin	1	3
0.732542	Metformin	1	3
0.868988	Metformin	1	3
1.3894	Metformin	1	3
0.891092	Metformin	1	3
0.999118	Metformin	1	3
1.03246	Metformin	1	3
1.40568	Metformin	1	3
0.793784	Metformin	1	3
0.852286	Metformin	1	3
0.807771	Metformin	1	3
0.849191	Metformin	1	3
1.09517	Metformin	1	3
0.819312	Metformin	1	3
0.893695	Metformin	1	3
0.879414	Metformin	1	3
0.499982	Metformin	1	3
0.956246	Metformin	1	3
0.740399	Metformin	1	3
0.972486	Metformin	1	3
0.262503	Metformin	1	3
0.900853	Metformin	1	3
0.908164	Metformin	1	3
1.30913	Metformin	1	3
0.98475	Metformin	1	3
1.04608	Metformin	1	3
0.0530654	Metformin	1	3
1.06149	Metformin	1	3
0.818245	Metformin	1	3
1.02894	Metformin	1	3
1.16825	Metformin	1	3
1.0004	Metformin	2	3
1.03319	Metformin	2	3
1.05205	Metformin	2	3
0.879164	Metformin	2	3
1.18662	Metformin	2	3
0.59971	Metformin	2	3
1.17302	Metformin	2	3
1.06949	Metformin	2	3
0.963303	Metformin	2	3
1.03797	Metformin	2	3
0.690379	Metformin	2	3
0.999967	Metformin	2	3
0.972498	Metformin	2	3
0.576558	Metformin	2	3
0.998433	Metformin	2	3
1.16119	Metformin	2	3
0.963076	Metformin	2	3
0.932717	Metformin	2	3
0.992119	Metformin	2	3
1.08928	Metformin	2	3
0.12217	Metformin	2	3
1.079	Metformin	2	3
1.24038	Metformin	2	3
0.743508	Metformin	2	3
0.981043	Metformin	2	3
1.15153	Metformin	2	3
1.00952	Metformin	2	3
1.03225	Metformin	2	3
1.1007	Metformin	2	3
0.828179	Metformin	2	3
0.721176	Metformin	2	3
1.2442	Metformin	2	3
0.414225	Metformin	2	3
0.503016	Metformin	2	3
2.07975	Metformin	2	3
0.94584	Metformin	2	3
1.12261	Metformin	2	3
0.948562	Metformin	2	3
1.08804	Metformin	2	3
0.964647	Metformin	2	3
0.891511	Metformin	2	3
0.984282	Metformin	2	3
1.00953	Metformin	2	3
1.08567	Metformin	2	3
0.510807	Metformin	2	3
1.0855	Metformin	2	3
1.04314	Metformin	2	3
1.039	Metformin	2	3
0.858528	Metformin	2	3
0.717287	Metformin	2	3
1.01829	Metformin	2	3
1.0277	Metformin	2	3
1.02263	Metformin	2	3
0.683053	Metformin	2	3
0.910327	Metformin	2	3
0.982981	Metformin	2	3
0.98157	Metformin	2	3
1.0111	Metformin	2	3
0.771348	Metformin	2	3
1.08357	Metformin	2	3
1.00094	Metformin	2	3
1.04309	Metformin	2	3
1.37924	Metformin	2	3
0.9318	Metformin	3	3
0.750614	Metformin	3	3
1.15285	Metformin	3	3
0.942824	Metformin	3	3
0.86691	Metformin	3	3
0.939262	Metformin	3	3
0.930691	Metformin	3	3
0.927853	Metformin	3	3
0.960054	Metformin	3	3
0.744465	Metformin	3	3
0.905099	Metformin	3	3
0.943626	Metformin	3	3
1.06505	Metformin	3	3
0.858327	Metformin	3	3
0.960457	Metformin	3	3
0.881726	Metformin	3	3
1.03081	Metformin	3	3
0.83985	Metformin	3	3
0.768833	Metformin	3	3
0.644991	Metformin	3	3
0.991649	Metformin	3	3
1.52687	Metformin	3	3
1.68381	Metformin	3	3
0.85283	Metformin	3	3
1.16665	Metformin	3	3
1.16309	Metformin	3	3
1.05176	Metformin	3	3
1.07169	Metformin	3	3
1.04827	Metformin	3	3
1.27089	Metformin	3	3
0.889309	Metformin	3	3
0.811479	Metformin	3	3
1.18094	Metformin	3	3
0.97321	Metformin	3	3
1.02146	Metformin	3	3
0.893378	Metformin	3	3
1.31221	Metformin	3	3
1.12939	Metformin	3	3
1.21313	Metformin	4	3
0.956828	Metformin	4	3
1.03957	Metformin	4	3
1.05155	Metformin	4	3
0.938647	Metformin	4	3
1.10044	Metformin	4	3
0.987128	Metformin	4	3
1.10578	Metformin	4	3
0.864668	Metformin	4	3
1.07048	Metformin	4	3
1.22042	Metformin	4	3
0.857962	Metformin	4	3
1.20562	Metformin	4	3
1.20395	Metformin	4	3
0.993583	Metformin	4	3
0.931496	Metformin	4	3
1.03142	Metformin	4	3
0.880697	Metformin	4	3
1.07189	Metformin	4	3
0.573711	Metformin	4	3
1.1275	Metformin	4	3
1.02042	Metformin	4	3
1.25774	Metformin	5	3
1.02279	Metformin	5	3
1.13966	Metformin	5	3
0.223708	Metformin	5	3
0.979495	Metformin	5	3
1.03907	Metformin	5	3
1.37387	Metformin	5	3
1.37866	Metformin	5	3
0.991177	Metformin	5	3
0.906358	Metformin	5	3
-0.250076	Metformin	5	3
1.03135	Metformin	5	3
1.15487	Metformin	5	3
1.55298	Metformin	5	3
1.04099	Metformin	5	3
0.873747	Metformin	5	3
1.13414	Metformin	5	3
1.0226	Metformin	5	3
1.14777	Metformin	5	3
0.940176	Metformin	5	3
1.12371	Metformin	5	3
1.09456	Metformin	5	3
0.96746	Metformin	5	3
1.22203	Metformin	5	3
1.02662	Metformin	5	3
0.97897	Metformin	5	3
1.13477	Metformin	5	3
0.921758	Metformin	5	3
1.02358	Metformin	5	3
1.12817	Metformin	5	3
1.14074	Metformin	5	3
0.850631	Metformin	5	3
1.16639	Metformin	5	3
0.921107	Metformin	5	3
1.04911	Metformin	5	3
0.894318	Metformin	5	3
0.906587	Metformin	5	3
0.943216	Metformin	5	3
0.800379	Metformin	5	3
1.20758	Metformin	5	3
0.988761	Metformin	5	3
1

## Sheet: FLIM statistics
Statistical results of zebrafish autofluorescence data
Mean+/-95%CI
Comparison between groups showing the overall effect; computed as fold change (ratio) or simple difference with 95%CI and p values; p<0.05
FIGURE 5	NAD(P)H tm (ps)	NAD(P)H t1 (ps)	NAD(P)H t2 (ps)	NAD(P)H a1 (%)*	FAD tm (ps)	FAD t1 (ps)	FAD t2 (ps)	FAD a1 (%)*	Optical redox ratio	OMI index*
Control	817 (778, 857)	315 (305, 326)	2480 (2440, 2530)	76.4 (74.9, 77.9)	430 (411, 450)	207 (201, 214)	1450 (1410, 1500)	79.5 (78.6, 80.3)	0.648 (0.636, 0.660)	0.944 (0.906, 0.982)
Metformin	840 (810, 872)	348 (340, 357)	2610 (2540, 2670)	77.4 (76.3, 78.5)	427 (412, 442)	223 (216, 229)	1430 (1380, 1470)	79.7 (79.1, 80.3)	0.687 (0.674, 0.699)	1.035 (0.984, 1.087)
Metformin / Ctrl; p value	1.03 (0.97, 1.09); 0.322	1.10 (1.06, 1.15); <0.001	1.05 (1.02, 1.08); 0.002	0.96 (-0.9, 2.8); 0.293	0.99 (0.94, 1.05); 0.772	1.08 (1.03, 1.12); 0.002	0.98 (0.94, 1.03); 0.388	0.27 (-0.80, 1.34); 0.610	1.06 (1.03, 1.09); <0.001	0.091 (0.03, 0.152); 0.007
* comparison computed as a simple difference (Metformin minus control) and represents percentage points of change; others are computed as a fold change (ratio)
