# Supplementary material for: In vivo fluorescence lifetime imaging of macrophage intracellular metabolism during wound responses in zebrafish
Source: eLife. 2022 Feb 24;11:e66080. doi: 10.7554/eLife.66080 (PMC8871371; doi:10.7554/eLife.66080)
Supplement: Figure 6—source data 1. [file elife-66080-fig6-data1.xlsx]

## Sheet: 6B-TNF
repeat	condition	time (h)	% TNF+ macrophages
1	wt	72	0.714286
1	wt	72	0.34375
1	wt	72	0.6875
1	wt	72	0.94
1	wt	72	0.540984
1	wt	72	0.744186
1	wt	72	0.491803
1	wt	72	0.268293
1	stat6-/-	72	0.818182
1	stat6-/-	72	0.518519
1	stat6-/-	72	0.5
1	stat6-/-	72	0.764706
1	stat6-/-	72	0.896552
1	stat6-/-	72	0.923077
1	stat6-/-	72	0.823529
1	stat6-/-	72	1
1	wt	96	0.16
1	wt	96	0
1	wt	96	0.15
1	wt	96	0.04
1	wt	96	0.148148
1	wt	96	0
1	wt	96	0.103448
1	wt	96	0
1	wt	96	0.133333
1	wt	96	0.25
1	wt	96	0.5
1	stat6-/-	96	0.26087
1	stat6-/-	96	0.571429
1	stat6-/-	96	0.1875
1	stat6-/-	96	0.384615
1	stat6-/-	96	0.448276
1	stat6-/-	96	0.53125
2	wt	72	0.257143
2	wt	72	0.142857
2	wt	72	0.318182
2	wt	72	0.214286
2	wt	72	0.228571
2	wt	72	0.0526316
2	wt	72	0.0697674
2	wt	72	0.384615
2	wt	72	0.285714
2	wt	72	0.388889
2	wt	72	0.195122
2	wt	72	0.272727
2	wt	72	0.32
2	wt	72	0.366667
2	wt	72	0.195122
2	wt	72	0.2
2	wt	72	0.371429
2	stat6-/-	72	0.28125
2	stat6-/-	72	0.423077
2	stat6-/-	72	0.413793
2	stat6-/-	72	0.369565
2	stat6-/-	72	0.333333
2	stat6-/-	72	0.5
2	stat6-/-	72	0.55
2	wt	96	0.384615
2	wt	96	0.2
2	wt	96	0.148148
2	wt	96	0.0952381
2	wt	96	0.0555556
2	wt	96	0.027027
2	wt	96	0.25
2	wt	96	0.0740741
2	wt	96	0.0769231
2	wt	96	0.1
2	wt	96	0.193548
2	wt	96	0.28
2	wt	96	0.176471
2	wt	96	0.2
2	wt	96	0.129032
2	stat6-/-	96	0.266667
2	stat6-/-	96	0.235294
2	stat6-/-	96	0.1
2	stat6-/-	96	0.25
2	stat6-/-	96	0.133333
2	stat6-/-	96	0.227273
2	stat6-/-	96	0.266667
3	wt	72	0.214286
3	wt	72	0.689655
3	wt	72	0.416667
3	wt	72	0.580645
3	wt	72	0.407407
3	wt	72	0.282051
3	wt	72	0.195652
3	wt	72	0.282051
3	stat6-/-	72	0.432432
3	stat6-/-	72	0.464286
3	stat6-/-	72	0.413793
3	stat6-/-	72	0.571429
3	wt	96	0.285714
3	wt	96	0.357143
3	wt	96	0.5
3	wt	96	0.130435
3	wt	96	0.470588
3	wt	96	0.208333
3	wt	96	0.153846
3	stat6-/-	96	0.259259
3	stat6-/-	96	0.333333
3	stat6-/-	96	0.375
3	stat6-/-	96	0.358974
3	stat6-/-	96	0.230769
3	stat6-/-	96	0.26087
3	stat6-/-	96	0.366667

## Sheet: Figure 6
F.Int	F.a1	F.t1	F.t2	F.tm	N.Int	N.a1	N.t1	N.t2	N.tm	rr	Group	Fish	Repeat	Count
16.372	78.1165	430.46	2204.66	708.861	216.037	74.4052	437.594	3056.82	1097.43	0.963788	Wt	1	1	50
29.4789	73.2974	536.257	1891.1	832.158	425.753	70.6795	406.472	2926.72	1131.5	0.940866	Wt	1	1
24.69	75.6851	394.507	2045.59	701.03	314.761	68.9199	486.425	3068.01	1259.29	0.939278	Wt	1	1
17.6338	70.3563	526.263	2145.98	901.289	229.665	69.2942	439.446	3271.87	1279.19	0.962851	Wt	1	1
31.248	69.9664	536.929	2103.49	908.663	373.241	59.8481	449.408	3115.5	1512.01	0.931197	Wt	1	1
41.1486	71.1939	505.712	1886.18	824.924	553.913	50.8288	500.457	3034.49	1701.34	0.932623	Wt	1	1
32.9557	65.6338	453.608	2262.51	985.138	385.744	60.8408	493.535	2956.11	1431.72	0.926512	Wt	1	1
33.1575	74.883	519.972	1848.79	770.272	410.882	51.8136	514.232	6422.49	1830	0.931363	Wt	1	1
31.8859	75.7587	511.624	1918.33	772.456	364.942	67.6712	426.655	3011.77	1252.88	0.926034	Wt	1	1
34.657	76.043	446.115	1683.16	678.929	387.548	70.0652	418.331	2715.75	1104.86	0.923975	Wt	1	1
26.7664	58.016	556.782	2549.09	1180.24	312.451	77.4248	391.545	2725.95	904.84	0.938065	Wt	1	1
39.6619	77.4757	466.691	1985.3	718.006	417.081	46.7573	598.762	3231.8	1955.18	0.923407	Wt	1	1
23.8331	82.036	518.071	1822.03	681.414	346.389	73.0777	415.683	2775.7	1041.47	0.951003	Wt	1	1
13.2899	78.0077	321.35	1620.57	562.284	204.2	75.5383	437.138	2837.61	1008.27	0.973212	Wt	1	1
51.6579	72.9172	499.855	2116.87	826.597	337.408	75.0315	299.237	2628.41	894.114	0.883141	Wt	1	1
28.2763	76.393	398.139	1653.62	661.642	337.747	63.2644	454.396	2948.57	1374.91	0.944399	Wt	1	1
62.2131	73.6192	546.028	2805.44	1005.96	500.148	74.9564	309.806	2396.64	852.892	0.901849	Wt	1	1
32.7092	62.8701	526.692	2289.05	1031.08	426.403	57.925	537.557	3239.85	1634.39	0.935724	Wt	1	1
38.4073	65.2501	517.597	2329.73	1018.76	385.8	55.1833	629.775	3285.11	1751.32	0.924378	Wt	1	1
40.0181	76.9245	495.599	1777.8	712.116	390.884	55.8693	600.417	3310.99	1699.07	0.923133	Wt	1	1
10.5068	68.451	539.068	2188.81	945.75	129.384	77.5601	427.411	2782.25	940.386	0.973455	Wt	2	1
36.7941	62.0158	516.891	2486.19	1096.79	434.557	57.0207	591.049	3027.42	1629.25	0.92629	Wt	2	1
34.8727	68.2967	540.5	2359.43	982.509	363.347	53.7158	850.45	3549.55	2033.24	0.920801	Wt	2	1
32.649	78.5166	480.946	1777.45	670.005	372.053	55.489	587.081	3284.63	1722.2	0.927526	Wt	2	1
13.5	74.614	567.878	3302.36	920.252	169.155	76.8531	480.737	3056.46	1037.57	0.963607	Wt	2	1
9.15972	59.6659	641.449	2376.53	1129.31	109.59	78.7804	551.954	3092.72	1075.76	0.990102	Wt	2	1
42.9314	73.4977	509.703	2187.7	854.2	418.5	47.9683	779.981	3638.96	2165	0.918116	Wt	2	1
31.3022	66.0919	502.894	2298.53	953.859	402.481	67.8933	514.423	2984.07	1293.5	0.935704	Wt	2	1
34.9034	63.1862	481.934	2297.58	1036.94	384.89	55.6823	1029.58	3583.94	2063.57	0.926385	Wt	2	1
35.6038	53.8414	748.373	2641.86	1309.01	353.328	50.5082	887.727	3926.34	2204.96	0.91436	Wt	2	1
48.0595	75.3043	444.978	1809.67	710.147	360.697	49.0407	829.704	3629.91	2117.87	0.899145	Wt	2	1
21.688	72.6244	537.59	2384.61	883.247	231.986	75.5591	400.965	2810.57	976.095	0.927767	Wt	2	1
25.9032	81.5186	343.467	1565.78	514.024	335.968	69.4445	444.892	3181.18	1251.64	0.940315	Wt	2	1
24.5871	67.5337	511.185	2085.48	914.923	285.105	80.1827	324.622	2511.64	764.282	0.895757	Wt	2	1
29.8112	73.7141	462.49	1842.63	769.134	252.445	66.4303	531.842	3128.41	1368.2	0.890909	Wt	2	1
37.0129	63.8403	591.473	2159.43	1057.07	376.881	70.9888	406.337	2821.37	1114.06	0.927198	Wt	2	1
34.7331	57.0642	774.079	4290.6	1453.98	353.9	57.2659	543.217	3120.28	1639.39	0.916327	Wt	2	1
33.7607	74.0794	425.6	1801.26	718.677	319.294	51.1127	728.807	3321.46	1965.73	0.913137	Wt	2	1
40.2544	77.1722	580.697	1506.95	715.429	329.929	71.877	360.895	2825.54	1060.64	0.88997	Wt	2	1
5.71667	74.6868	392.442	1926.43	704.618	56.2167	79.232	479.624	3264.27	1028.58	0.996605	Wt	2	1
28.991	65.6641	578.01	2170.13	1011.94	310.938	70.7012	411.276	2871.51	1107.81	0.932787	Wt	2	1
25.9293	75.51	448.188	1906.47	714.104	240.249	64.3025	623.763	3377.24	1546.12	0.934282	Wt	2	1
20.8879	69.4413	670.341	1920.25	930.511	272.401	71.0886	418.615	2842.95	1109.9	0.947101	Wt	2	1
28.1161	73.1751	530.237	2008.71	840.469	289.596	67.0249	474.526	2974.02	1288.68	0.922079	Wt	2	1
29.6696	74.0074	564.699	1689.1	784.554	374.586	65.8915	462.279	3006.37	1311.89	0.931763	Wt	2	1
42.0149	76.4723	304.679	1717.53	599.844	305.213	75.0536	348.673	2412.85	866.911	0.902649	Wt	2	1
50.7328	61.0745	604.175	2354.74	1122.67	442.076	74.0618	332.308	2609.88	934.518	0.891783	Wt	2	1
50.7483	63.4766	752.427	1935.54	1079.64	396.622	61.7389	458.746	2821.94	1344.39	0.896512	Wt	3	1
41.4364	62.436	557.528	2137.36	1037.07	294.319	70.1692	448.998	2610.96	1082.36	0.883077	Wt	3	1
59.1375	61.0681	682.775	2619.53	1228.28	299.06	66.0533	474.845	2589.47	1194.35	0.864592	Wt	3	1
26.5306	68.4797	800.354	1590.4	961.25	198.386	73.5432	464.174	2959.27	1089.08	0.908044	stat6-/-	1	1	52
36.5098	72.3112	649.086	1447.73	814.839	260.523	76.5704	366.155	2676.71	898.511	0.891732	stat6-/-	1	1
24.7781	72.5186	650.502	1864.51	861.793	300.06	68.4123	488.82	2883.43	1220.43	0.93024	stat6-/-	1	1
61.2056	70.7749	804.689	1350.93	920.813	254.72	79.7937	289.368	2317.77	694.885	0.79857	stat6-/-	1	1
20.3435	76.3993	498.068	1713.64	708.751	294.145	71.8012	484.191	3126.92	1195.76	0.940899	stat6-/-	1	1
71.7709	62.3006	942.03	1384.56	1045.24	197.807	75.3687	350.582	2162.69	793.524	0.738846	stat6-/-	1	1
64.3149	69.3874	825.854	1440.87	942.898	372.237	75.1145	339.718	2421.49	861.41	0.834795	stat6-/-	1	1
43.5606	78.3617	323.832	1772.34	601.121	508.778	71.7378	365.328	2815.19	1051.36	0.923234	stat6-/-	1	1
46.8832	75.0138	417.255	1620.9	683.071	459.096	75.6207	374.534	2656.06	932.572	0.912073	stat6-/-	1	1
68.5056	63.4142	1062.64	1295.3	1127.09	165.094	78.7901	367.485	2329.93	768.805	0.746383	stat6-/-	1	1
50.4514	78.11	364.504	1816.57	607.538	523.282	73.0143	336.121	2667.26	963.399	0.912545	stat6-/-	1	1
65.1096	77.947	374.407	1633.24	613.461	496.599	78.0599	309.599	2336.31	756.88	0.89237	stat6-/-	1	1
77.0765	82.9312	333.353	1436.6	494.84	313.607	83.8407	267.392	2003.97	553.459	0.851256	stat6-/-	1	1
49.8985	76.7887	379.541	1721.78	653.646	341.122	71.8327	309.026	2614.37	976.043	0.874823	stat6-/-	1	1
30.97	68.8996	745.947	1752.93	954.966	252.847	69.7203	478.416	2998.53	1217.94	0.886718	stat6-/-	1	1
25.2678	66.1791	683.487	2062.65	1002.7	296.313	68.1245	519.872	3226.97	1336.91	0.925126	stat6-/-	1	1
30.1972	71.6487	619.042	1834.26	858.354	351.91	69.8921	475.562	2646.58	1121.04	0.92564	stat6-/-	1	1
20.8144	75.1025	471.96	1643.1	679.223	304.356	75.6449	468.74	2892.71	1037.57	0.950157	stat6-/-	1	1
25.4022	65.4356	973.425	1667.37	1100.03	159.9	69.8514	597.943	2910.73	1271.43	0.870154	stat6-/-	1	1
25.1691	73.6302	588.321	2177.71	883.533	347.415	67.1178	450.291	2826.34	1205.81	0.93798	stat6-/-	1	1
11.4764	74.6059	527.477	1467.15	689.145	138.743	82.5098	410.489	2777.34	794.469	0.960689	stat6-/-	2	1
24.12	76.6231	502.924	2047.81	751.606	382.246	73.9284	406.394	2740.23	1008.81	0.945456	stat6-/-	2	1
24.1244	63.6187	564.369	2158.88	1012.78	261.613	67.8136	512.957	2991.98	1288.92	0.928581	stat6-/-	2	1
29.0259	69.2758	508.21	1963.14	866.554	315.776	71.8411	427.114	2706.13	1055.34	0.919758	stat6-/-	2	1
13.567	77.2376	464.901	1620.06	654.836	164.287	81.9248	424.272	2883.48	835.653	0.95297	stat6-/-	2	1
26.2698	77.6829	422.685	1698.57	628.164	353.597	78.1337	383.077	2626.97	866.654	0.935385	stat6-/-	2	1
16.3423	78.7963	495.477	1775.29	673.745	221.219	79.2482	429.92	2940.89	924.596	0.968894	stat6-/-	2	1
34.1187	75.6921	449.213	2030.51	730.386	371.949	74.0528	407.749	2718.65	999.093	0.922431	stat6-/-	2	1
27.9412	84.1208	416.21	1915.58	610.364	381.588	79.9303	396.688	2664.63	843.314	0.934472	stat6-/-	2	1
14.4386	75.677	512.755	1344.66	664.772	181.968	81.0428	426.259	2873.07	842.333	0.965745	stat6-/-	2	1
40.2418	57.3014	636.086	2320.36	1196.65	280.487	60.6871	612.411	3426.22	1594.01	0.886065	stat6-/-	2	1
29.607	71.7422	531.206	1810.43	800.487	303.889	73.3931	445.016	2794.88	1058.76	0.92438	stat6-/-	2	1
39.1762	64.3301	403.638	2298.32	982.291	241.342	64.7599	511.972	3191.2	1402.15	0.857111	stat6-/-	2	1
31.5942	61.1479	607.69	2287.73	1101.76	263.987	62.9369	611.484	3188.8	1528.76	0.897303	stat6-/-	2	1
20.4872	71.888	540.18	1937.4	817.755	225.775	73.2942	473.687	2879.81	1089.48	0.929984	stat6-/-	3	1
40.3619	65.3864	747.133	1995.39	1079.11	242.712	69.43	508.314	2915.23	1228.01	0.863974	stat6-/-	3	1
32.8754	69.6855	522.935	1908.69	862.798	302.252	72.389	417.143	2793.66	1066.7	0.903405	stat6-/-	3	1
16.4333	77.5581	464.892	1726.84	681.916	211.461	78.5044	424.008	2703.77	878.2	0.949491	stat6-/-	3	1
30.1831	69.7363	573.852	1995.32	900.357	283.972	67.0502	544.645	2931.77	1295.05	0.903826	stat6-/-	3	1
33.4597	76.4717	390.528	1812.02	665.731	454.387	74.7531	389.08	2352.91	879.977	0.932209	stat6-/-	3	1
23.9503	63.7453	567.457	2312.58	1017.17	226.348	64.9306	756.939	3853.32	1778.19	0.907214	stat6-/-	3	1
24.9467	67.441	554.697	2277.6	973.335	233.611	69.528	558.894	3250.67	1334.36	0.911247	stat6-/-	3	1
27.1554	70.0937	602.974	2132.47	938.487	242.307	72.2621	517.59	2978.28	1182.29	0.904683	stat6-/-	3	1
22.3545	68.1212	583.582	2440.78	988.415	230.416	68.2743	637.246	3413.76	1439.61	0.923362	stat6-/-	3	1
24.7458	66.9606	638.265	1890.97	952.106	166.502	72.3886	659.942	3207.56	1314.99	0.878996	stat6-/-	3	1
25.1399	66.1319	708.249	1942.98	979.262	201.513	68.4621	630.183	3326.69	1418.21	0.902666	stat6-/-	3	1
25.2008	73.7733	499.059	2098.78	813.566	221.361	71.2229	457.226	2958.27	1152.3	0.90629	stat6-/-	3	1
26.249	73.3667	533.164	1841.18	783.951	321.916	73.8321	438.201	2871.33	1055.74	0.930572	stat6-/-	3	1
22.2815	71.9598	524.305	2250.08	895.463	249.637	70.4286	432.976	2907.95	1143.78	0.927725	stat6-/-	3	1
53.5263	81.1968	270.474	1331.23	444.908	341.491	80.0025	264.204	2217.34	649.349	0.876717	stat6-/-	3	1
74.2845	79.0991	390.216	1418.63	560.074	395.022	80.8375	277.554	2159.47	647.617	0.863491	stat6-/-	3	1
31.0632	82.9815	288.249	1356.61	438.075	151.158	81.8249	342.025	2362.21	711.464	0.860264	stat6-/-	3	1
24.8366	75.7706	290.404	1739.51	586.205	247.7	77.2887	221.379	2515.08	752.17	0.928056	Wt	1	2	72
20.5926	72.8469	335.388	2092.62	735.798	260.141	73.8006	244.928	2746.72	888.543	0.932	Wt	1	2
17.3392	73.4937	396.857	2411.56	825.363	237.402	70.8594	298.738	3136.57	1086.66	0.938058	Wt	1	2
22.7693	70.746	369.019	1956.18	770.082	269.744	71.1007	272.166	2820.97	996.288	0.926039	Wt	1	2
13.5907	79.9315	374.213	2169.14	674.747	198.614	81.0179	179.461	2395.34	596.145	0.940555	Wt	1	2
21.618	73.6967	355.358	1876.25	701.357	223.419	76.7125	261.618	2640.03	819.367	0.914508	Wt	1	2
18.3648	71.463	346.629	1832.29	729.612	206.335	75.5043	316.802	2893.95	950.027	0.922068	Wt	1	2
21.537	77.2295	283.587	1669.85	568.787	192.634	80.6949	191.503	2491.69	647.13	0.908659	Wt	1	2
33.5432	81.3663	275.424	1505.12	485.265	266.821	85.9731	124.567	2007.95	417.172	0.88194	Wt	1	2
17.4608	72.405	291.396	2422.01	832.13	213.275	67.0536	445.828	3044.02	1271.84	0.92738	Wt	1	2
16.202	70.2757	282.202	1861.82	708.53	177.495	67.0575	508.045	3073.62	1328.16	0.920297	Wt	1	2
19.1311	75.5072	341.871	1799.3	632.122	216.282	78.0649	211.959	2515.46	719.97	0.925107	Wt	1	2
33.0212	71.4586	319.616	1675.42	681.115	292.886	80.2836	166.144	2357.13	615.623	0.904171	Wt	1	2
26.5282	65.9433	433.9	1867.65	858.789	278.851	75.4249	234.465	2458.82	779.527	0.916055	Wt	1	2
16.56	79.0908	462.943	1619.19	633.92	210.184	84.1627	173.43	2239.8	500.226	0.928261	Wt	2	2
23.1054	70.4006	561.175	1783.69	840.089	221.012	78.7486	233.422	2505.84	719.078	0.908667	Wt	2	2
23.5789	60.8229	811.566	1677.89	999.748	209.338	75.6691	258.355	2464.09	795.18	0.902973	Wt	2	2
34.5127	69.1349	570.196	1528.5	826.33	235.741	81.8226	200.23	2137.15	568.073	0.888494	Wt	2	2
24.1671	76.9736	367.116	1948.92	659.553	283.129	79.8579	177.837	2354.61	625.306	0.929245	Wt	2	2
31.0851	76.3779	335.156	1817.07	640.314	291.888	81.7773	153.094	2223.24	546.509	0.912095	Wt	2	2
16.9326	80.1458	449.818	1629.24	622.149	242.067	81.7646	230.238	2574.75	671.133	0.939515	Wt	2	2
25.6667	79.3832	315.715	1867.34	593.629	225.219	82.5802	213.464	2268.02	595.252	0.913546	Wt	2	2
17.6802	79.5559	342.49	1545.2	549.918	251.707	82.632	190.513	2319.08	557.735	0.936376	Wt	2	2
21.6849	78.8865	272.277	1815.58	577.401	196.8	82.7023	187.21	2242.83	551.65	0.904008	Wt	2	2
21.7841	72.8234	345.091	2004.78	704.114	257.436	78.1835	213.044	2414.63	698.174	0.927479	Wt	2	2
19.5351	78.6526	355.102	1798.45	610.177	260.945	82.9266	177.578	2126.87	507.621	0.933804	Wt	2	2
25.7735	71.9572	361.678	2054.69	772.558	270.365	78.7118	197.742	2472.84	678.494	0.918394	Wt	2	2
20.6953	74.8467	577.857	2036.92	862.821	200.479	77.8477	238.942	2442.4	726.264	0.913169	Wt	3	2
22.196	72.5698	390.037	1848.93	724.786	207.193	78.9329	252.095	2447.73	726.819	0.912305	Wt	3	2
15.0903	71.9231	359.98	2034.21	747.253	179.411	75.6815	495.866	3125.02	1111.29	0.926441	Wt	3	2
35.0513	86.4173	180.665	1316.51	330.88	229.949	91.0918	87.938	1874.67	252.568	0.844606	Wt	3	2
16.2845	63.7816	408.906	2043.49	917.571	185.069	73.6793	285.404	2553.25	874.562	0.924345	Wt	3	2
19.8822	74.593	339.55	1907.16	687.275	240.036	81.6129	185.271	2274.02	574.589	0.927069	Wt	3	2
29.893	75.4272	474.627	1438.69	672.991	234.771	84.1689	131.95	2062.62	444.715	0.883497	Wt	3	2
38.2715	75.0903	521.18	1622.82	740.352	236.02	84.3983	167.897	2125.04	480.143	0.887286	Wt	3	2
22.2721	71.7589	450.434	1788.28	770.879	222.051	78.1631	253.692	2321.07	706.969	0.913105	Wt	3	2
18.024	78.3589	395.936	1774.04	638.392	209.655	83.119	192.903	2261.71	546.545	0.924866	Wt	3	2
20.739	76.8662	371.264	1993.64	682.505	172.196	81.4495	206.643	2387.71	622.289	0.90458	Wt	3	2
14.7606	67.5	417.537	2322.18	960.744	178.819	74.042	500.614	2871.89	1087.48	0.925128	Wt	3	2
17.6713	77.2593	348.59	2165.43	711.944	225.532	81.4318	166.486	2600.59	620.334	0.930292	Wt	3	2
24.8446	74.5654	356.474	1677.68	654.987	223.756	82.1586	172.185	2260.73	550.963	0.907763	Wt	3	2
19.6633	66.0654	377.776	1860.75	810.512	212.032	75.4875	229.353	2633.94	816.322	0.91873	Wt	3	2
21.4615	78.2008	372.362	1817.18	623.032	186.576	84.9006	148.885	2162.53	455.851	0.905777	Wt	3	2
25.9979	75.6668	425.368	1655.72	695.357	301.619	81.5423	176.644	2269.67	562.254	0.917622	Wt	3	2
17.9824	73.7165	349.355	1914.55	702.749	222.567	80.6046	165.58	2345.74	585.299	0.93036	Wt	4	2
24	69.1309	369.89	1757.69	736.46	257.928	77.3395	222.647	2454.47	733.45	0.919951	Wt	4	2
39.5439	77.7984	285.792	1367.91	506.926	209.456	86.8455	137.028	2016.51	405.556	0.881854	Wt	4	2
22.8385	64.7769	278.357	2004.35	840.615	302.038	75.4578	211.239	2413.86	746.064	0.93068	Wt	4	2
31.8854	79.2663	285.054	1469.98	513.273	220.322	86.6978	141.937	2073.55	417.915	0.8773	Wt	4	2
22.2324	72.7343	341.165	1897.43	696.877	226.215	78.3756	224.354	2525.32	728.61	0.914465	Wt	4	2
27.7248	74.2914	355.263	1747.99	649.676	226.704	82.9972	145.469	2170.34	499.266	0.901705	Wt	4	2
45.5167	77.7336	338.101	1621.32	589.607	213.579	86.2203	135.167	2046.85	416.09	0.861742	Wt	4	2
44.2308	80.8586	285.77	1639.77	522.696	315.262	84.4201	123.758	2057.08	451.205	0.898254	Wt	4	2
21.9235	69.7157	458.702	1760.56	777.528	231.818	78.5497	235.888	2389.85	707.226	0.916942	Wt	4	2
13.7193	78.9125	436.459	2092.46	733.566	192.845	81.9611	163.934	2239.66	537.382	0.937823	Wt	4	2
45.4558	74.1708	333.482	1757.55	652.454	253.916	82.9922	157.164	2180.86	534.91	0.867314	Wt	4	2
28.1492	75.4859	295.28	1972.05	661.474	197.018	81.209	189.861	2512.88	634.631	0.880289	Wt	4	2
85.8742	79.9395	331.127	1376.7	519.433	325.748	89.7187	70.3618	1679.2	272.128	0.820076	Wt	4	2
53.6064	80.2166	180.764	1292.8	376.769	175.043	91.8804	68.1867	1706.36	211.926	0.791407	Wt	4	2
65.9798	81.7594	246.063	1540.19	473.067	382.113	88.6424	109.035	1865.75	329.348	0.874757	Wt	4	2
67.1404	77.0685	267.727	1848.05	613.623	700.335	78.4934	182.809	2748.86	747.754	0.92265	Wt	4	2
35.3769	76.0567	304.143	1855.69	633.51	510.639	72.4146	195.99	2820.91	919.683	0.935905	Wt	5	2
32.511	79.2182	287.433	1691.6	536.912	329.571	82.8689	166.653	2169.26	518.359	0.920004	Wt	5	2
19.6311	76.7699	340.514	1487.62	568.038	264.628	80.3607	172.128	2388.68	607.992	0.932541	Wt	5	2
21.7669	78.7677	324.36	1793.77	576.045	294.143	81.5005	168.357	2389.5	582.418	0.933958	Wt	5	2
17.0108	77.8332	374.915	1990.57	685.398	222.129	78.4512	187.816	2500.41	683.499	0.933282	Wt	5	2
31.6632	79.5185	231.12	1514.7	479	226.701	84.5132	125.219	2123.83	450.763	0.884116	Wt	5	2
20.1362	74.2478	351.52	1850.16	677.774	266.902	79.3174	210.085	2381.78	660.942	0.933825	Wt	5	2
21.5613	76.2805	307.008	1744.93	597.448	245.811	80.7371	180.99	2362.44	607.702	0.924661	Wt	5	2
24.4157	78.603	320.936	1561.13	519.359	214.805	85.4903	172.184	2245.2	480.97	0.915405	Wt	5	2
20.9681	76.8997	376.455	1705.42	638.993	194.323	83.3934	205.833	2346.01	563.909	0.934551	Wt	5	2
56.6921	79.2964	209.088	1412.25	450.847	288.493	90.0329	76.8804	1743.92	258.969	0.846101	Wt	5	2
11.5669	80.449	331.85	1927.04	576.033	145.785	81.4065	250.841	2520.18	671.102	0.935612	stat6-/-	1	2	118
18.8297	86.4749	186.998	1487.02	350.798	142.043	88.3386	118.202	2221.77	370.521	0.881918	stat6-/-	1	2
21.1691	80.3036	263.888	1546.55	479.314	177.981	85.4168	126.219	2035.42	410.622	0.901826	stat6-/-	1	2
38.5659	79.1548	284.791	1368.56	476.711	177.192	86.6185	141.167	2122.72	437.128	0.852688	stat6-/-	1	2
15.8673	85.2732	169.011	1523.57	348.736	112.829	86.3733	174.567	2496	504.746	0.871639	stat6-/-	1	2
39.1352	77.5029	317.849	1451.92	553.948	187.516	88.3579	100.048	2098.52	342.379	0.83493	stat6-/-	1	2
19.4665	84.4991	178.619	1388.44	340.843	146.637	88.8512	104.098	2191.02	343.676	0.881501	stat6-/-	1	2
24.0695	76.8235	346.917	1381.48	568.444	149.408	85.4772	170.144	2111.69	464.155	0.860191	stat6-/-	1	2
109.451	76.6811	325.298	1332.69	553.274	334.569	92.7175	53.4886	1560.84	181.508	0.766728	stat6-/-	1	2
22.1218	74.4354	427.887	1509.03	646.529	171.324	81.3885	204.255	2264.97	596.939	0.890419	stat6-/-	1	2
21.9928	73.6473	593.799	1435.8	755.527	185.753	81.0714	218.281	2368.73	625.348	0.895343	stat6-/-	1	2
15.4825	72.7489	412.583	1699.91	691.14	176.031	79.0502	259.888	2405.81	706.576	0.924399	stat6-/-	1	2
20.049	72.4009	401.671	1842.12	714.016	157.186	80.307	345.188	2579.18	797.826	0.897611	stat6-/-	1	2
18.227	76.1118	423.238	1901.8	707.292	143.739	80.804	245.182	2562.36	687.716	0.89549	stat6-/-	1	2
18.0904	68.7916	569.018	2021.33	939.217	170.856	78.7668	252.296	2399.07	708.706	0.909691	stat6-/-	1	2
131.668	81.4095	242.831	1404.01	455.47	459.997	93.8099	47.7107	1559.2	153.717	0.787722	stat6-/-	1	2
20.3853	78.1899	355.624	1951.58	653.87	200.805	82.1009	179.203	2370.69	575.253	0.914126	stat6-/-	1	2
18.2236	76.1577	381.473	1534.68	603.558	219.886	80.1406	215.594	2546.82	676.35	0.926044	stat6-/-	1	2
75.3803	82.7434	238.736	1410.28	417.053	265.463	90.2346	90.1693	1855.83	296.195	0.820164	stat6-/-	1	2
9.62042	78.6554	360.063	1714.05	589.243	86.0153	83.3425	224.827	2308.74	578.737	0.902512	stat6-/-	1	2
11.3936	76.6607	428.727	2047.99	730.38	135.84	78.1335	404.644	2877.84	938.228	0.925446	stat6-/-	1	2
22.5878	74.449	530.844	1708.86	747.516	229.469	81.6039	185.569	2150.53	553.507	0.909967	stat6-/-	1	2
35.5476	76.2009	422.503	1615.75	660.98	280.667	82.5875	163.16	2132.35	521.945	0.89465	stat6-/-	1	2
16.4368	77.454	431.712	2549.72	797.213	222.695	77.5253	285.516	2517.54	789.318	0.93184	stat6-/-	1	2
54.1158	81.9023	242.898	1495.72	458.947	284.669	87.4172	161.648	2091.03	434.698	0.866964	stat6-/-	1	2
27.4296	66.1	870.526	1505.53	1029.13	139.942	79.2072	375.607	2688.1	852.821	0.812297	stat6-/-	1	2
21.8318	75.6341	440.98	1883.51	749.298	281.45	80.9685	187.934	2255.56	582.543	0.9301	stat6-/-	1	2
18.0104	78.6764	316.45	1548.78	547.087	172.055	86.4778	151.89	2017.08	412.439	0.908054	stat6-/-	1	2
27.7308	71.6224	584.157	1540.12	780.272	179.433	80.7417	223.16	2284.68	630.58	0.876061	stat6-/-	1	2
29.2407	68.834	563.549	1731.45	888.577	224.221	76.4242	271.914	2468.58	804.856	0.889381	stat6-/-	2	2
17.5058	75.4694	465.34	1642.29	692.501	269.663	82.3946	177.098	2324.62	558.88	0.942263	stat6-/-	2	2
25.8458	71.5669	663.389	1656.37	868.333	226.736	76.7813	267.628	2524.66	794.946	0.885511	stat6-/-	2	2
19.1777	79.577	421.799	1869.8	656.4	230.589	82.0654	193.65	2372.7	589.261	0.930461	stat6-/-	2	2
73.1982	70.2357	610.33	1434.62	834.413	274.239	87.7001	100.482	1816.18	341.985	0.804208	stat6-/-	2	2
16.1648	66.2264	593.795	1940.03	868.44	197.989	74.0215	330.823	2540.66	902.573	0.930356	stat6-/-	2	2
19.014	73.5331	444.779	1902.03	764.747	229.022	75.9618	264.455	2575.36	816.91	0.926245	stat6-/-	2	2
20.0585	70.3284	446.427	1803.7	794.391	203.059	76.293	264.861	2697.08	845.74	0.914779	stat6-/-	2	2
21.6597	73.9929	439.46	1829.81	741.128	182.972	74.114	333.109	2655.91	943.735	0.900014	stat6-/-	2	2
23.0244	70.9781	643.36	1694.11	881.562	236.142	73.7451	260.1	2614.07	882.274	0.914373	stat6-/-	2	2
16.1463	79.0385	339.031	2171.04	647.018	229.764	78.0405	237.51	2817.28	807.415	0.937281	stat6-/-	2	2
21.0871	73.4356	417.045	1885.38	731.407	236.984	75.876	257.218	2733.77	864.972	0.926276	stat6-/-	2	2
3.08696	60.6216	130.24	929.249	252.468	14.3099	77.355	203.231	2568.58	741.381	0.94886	stat6-/-	2	2
18.0933	76.7913	315.019	1930.35	629.31	278.804	82.693	208.998	2339.18	583.902	0.941007	stat6-/-	2	2
18.464	73.2308	625.592	1480.31	786.262	150.059	86.6154	104.127	2050.45	390.663	0.873953	stat6-/-	2	2
40.8328	79.0592	239.198	1306.57	448.362	266.683	81.5235	176.789	2359.92	586.089	0.878819	stat6-/-	2	2
17.7744	75.7233	470.67	1705.33	710.065	207.719	77.759	232.358	2613.06	756.562	0.924275	stat6-/-	3	2
15.6574	70.4342	434.377	1965.21	741.859	216.287	76.3335	341.025	3019.13	961.262	0.937575	stat6-/-	3	2
34.3396	82.2503	288.109	1608.45	489.223	300.784	85.0134	144.384	2231.11	470.564	0.911198	stat6-/-	3	2
14.6168	75.3307	510.076	1749.49	736.702	144.916	79.9838	197.25	2383.75	635.619	0.918693	stat6-/-	3	2
10.5865	76.9249	366.019	1992.31	675.325	141.067	78.4349	308.319	2699.83	823.821	0.93971	stat6-/-	3	2
10.6767	80.1092	401.296	1670.18	589.853	135.97	79.8247	316.605	2897.46	833.053	0.933943	stat6-/-	3	2
14.6	75.2369	393.793	2108.75	736.848	174.213	71.7265	443.066	3310.26	1237.95	0.929429	stat6-/-	3	2
24.346	76.636	391.974	1716.9	649.608	227.818	80.6219	204.464	2519.15	662.702	0.908896	stat6-/-	3	2
19.0656	75.9287	396.897	1744.95	659.791	233.082	74.269	325.027	2779.92	937.816	0.92858	stat6-/-	3	2
89.3808	78.7662	277.853	1333.38	493.4	371.306	91.5677	64.9253	1625.14	217.786	0.814384	stat6-/-	3	2
42.6737	72.4361	634.179	1366.16	805.478	182.547	85.4313	141.098	2057.47	433.392	0.807076	stat6-/-	3	2
78.3859	76.2298	408.147	1182.85	575.129	188.341	92.0409	66.4123	1539.13	204.229	0.716062	stat6-/-	3	2
15.9462	74.6594	548.236	1474.83	722.228	134.194	82.3779	224.794	2447.91	612.137	0.90842	stat6-/-	3	2
47.0501	83.8812	212.041	1505.44	410.596	300.124	87.0109	104.169	1983.11	371.012	0.882703	stat6-/-	3	2
20.1634	73.5488	665.394	1711.93	834.302	199.955	79.9341	196.727	2249.14	624.105	0.911697	stat6-/-	3	2
24.4577	75.727	431.658	1701.1	687.2	228.346	79.0551	204.804	2540.4	708.387	0.916093	stat6-/-	3	2
33.4554	77.3019	327.158	1687.85	598.112	253.382	82.138	227.121	2587.33	671.091	0.898185	stat6-/-	3	2
88.3269	87.4922	181.776	1219.87	308.528	218.231	96.09	35.6705	1407.39	98.092	0.733719	stat6-/-	3	2
15.5674	70.6909	551.193	1704.68	836.692	135.461	79.3436	295.391	2682.2	776.098	0.894922	stat6-/-	3	2
140.118	79.7357	295.839	1091.03	455.004	277.961	95.9191	31.9295	1077.53	81.3483	0.691998	stat6-/-	3	2
33.1974	84.7436	257.529	2093.44	515.174	266.276	84.3687	117.039	2372.9	474.143	0.891475	stat6-/-	3	2
16.64	77.4452	330.951	1582.76	529.035	185.467	73.7332	336.479	2619.01	932.339	0.928595	stat6-/-	3	2
24.7415	75.2232	289.548	1626.51	568.66	225.184	77.4466	231.906	2549.98	788.646	0.912185	stat6-/-	3	2
73.6497	82.8533	160.757	1029.36	301.634	358.854	93.2216	54.3824	1637.46	168.84	0.834878	stat6-/-	3	2
15.3246	76.0977	279.076	1891.8	616.557	210.772	78.4287	231.207	2507.57	728.462	0.934356	stat6-/-	3	2
18.5285	74.9395	344.581	1728.41	654.432	209.16	83.1577	172.116	2380.18	546.079	0.928393	stat6-/-	3	2
21.5522	73.3196	507.08	1814.15	777.912	221.279	80.3726	202.01	2443.14	640.897	0.917168	stat6-/-	3	2
40.4032	72.9997	741.339	1418.18	859.921	213.899	81.4198	186.266	2423.21	628.669	0.8659	stat6-/-	3	2
62.6376	77.8309	285.472	1362.28	509.278	273.275	89.4136	90.8814	1842.66	301.425	0.826288	stat6-/-	3	2
62.5931	86.2065	172.274	1063.54	287.2	227.593	92.418	78.2689	1913.85	237.292	0.813868	stat6-/-	4	2
18.0673	79.4426	320.289	1734.35	536.99	235.25	79.375	240.212	2589.25	722.982	0.934691	stat6-/-	4	2
17.3571	78.804	271.127	1536.2	516.848	244.277	80.2778	173.241	2334.92	610.587	0.934222	stat6-/-	4	2
16.8993	77.59	446.805	1798.66	678.044	240.55	78.0448	169.173	2362.02	654.575	0.93765	stat6-/-	4	2
13.8571	78.7115	342.397	1588.01	566.193	155.766	79.6784	218.217	2496.67	693.093	0.924233	stat6-/-	4	2
11.4151	78.2121	343.632	1789.36	591.09	151.094	75.0019	331.489	2956.54	978.405	0.933542	stat6-/-	4	2
20.53	81.4742	289.901	1769.81	511.55	229.19	81.6628	169.842	2339.76	571.84	0.924437	stat6-/-	4	2
17.4306	75.9878	364.515	1961.89	668.487	258.458	76.6126	188.28	2481.51	726.425	0.94095	stat6-/-	4	2
11.4364	74.9761	356.352	1667.62	619.226	152.345	81.9267	185.79	2464.22	598.236	0.935955	stat6-/-	4	2
19.6726	78.6771	320.507	1721.36	570.94	210.683	80.8866	182.585	2390.66	608.373	0.919762	stat6-/-	4	2
19.1186	75.8489	365.958	1705.2	631.613	264.763	81.0927	194.279	2324.37	596.447	0.936399	stat6-/-	4	2
8.92727	79.1236	324.908	1822.28	600.057	105.964	79.6599	421.936	3018.66	950.092	0.939446	stat6-/-	4	2
67.5452	85.6525	175.384	1201.68	314.577	175.583	93.2246	94.8731	1851.65	250.874	0.7642	stat6-/-	4	2
25.9388	81.2997	223.941	1667.44	471.191	124.136	85.3096	184.385	2587.43	548.736	0.830091	stat6-/-	4	2
15.5498	81.6283	277.326	2141.91	566.938	142	77.0439	392.447	2900.56	966.484	0.906101	stat6-/-	4	2
72.1619	87.1221	162.587	1188.92	287.925	201.113	94.6976	50.3573	1510.27	139.782	0.762102	stat6-/-	4	2
33.9228	81.8353	205.137	1287.48	378.887	236.963	87.6441	123.106	2063.62	378.039	0.883122	stat6-/-	4	2
17.5636	74.8553	324.069	1800.16	646.49	224.682	73.5451	339.614	2585.7	932.864	0.930466	stat6-/-	4	2
12.4453	78.5683	336.699	2221.71	637.988	174.016	75.824	346.429	2686.02	904.18	0.937747	stat6-/-	4	2
27.6346	75.9027	301.155	1738.13	624.449	326.058	79.9729	161.97	2265.59	586.624	0.920553	stat6-/-	4	2
21.63	78.6207	299.224	1510.85	525.572	312.677	82.6914	170.321	2182.95	516.673	0.937974	stat6-/-	4	2
74.7643	81.0381	253.528	1492.14	482.264	295.943	91.3954	70.9123	1648.58	229.154	0.812729	stat6-/-	4	2
13.2511	78.4482	307.261	2046.75	644.974	181.749	71.6534	308.471	2955.2	1050.1	0.935058	stat6-/-	4	2
32.3443	77.4808	327.91	1696.92	589.301	246.876	81.8212	162.401	2255.21	562.096	0.901662	stat6-/-	4	2
22.8333	81.1196	329.764	1767.02	573.642	387.911	81.8834	156.971	2293.04	545.894	0.945598	stat6-/-	4	2
41.5917	72.0197	609.04	1312.72	791.499	189.222	89.0896	82.0464	1994.34	308.722	0.811448	stat6-/-	5	2
22.9104	74.1225	570.112	1551.68	758.151	213.222	80.8542	175.238	2291.16	583.375	0.908673	stat6-/-	5	2
37.3954	78.4727	369.287	1583.7	592.814	226.092	85.8235	137.364	2038.39	422.332	0.883387	stat6-/-	5	2
15	73.2528	295.29	1739.29	649.566	195.675	75.7953	209.319	2631.47	788.98	0.929477	stat6-/-	5	2
18	75.8926	445.447	1765.26	690.521	244.096	78.2993	257.611	2605.47	766.158	0.931223	stat6-/-	5	2
39.4197	80.3899	243.739	1472.36	467.886	333.328	86.3871	128.46	2035.68	398.926	0.905058	stat6-/-	5	2
24.38	79.3859	290.153	1566.88	531.497	277.615	84.8477	155.766	2117.14	455.62	0.92044	stat6-/-	5	2
12.8509	73.878	330.141	1584.88	615.37	184.939	78.6322	233.54	2707.59	758.563	0.938514	stat6-/-	5	2
14.2258	76.6584	361.343	1720.81	645.349	159.148	77.7767	345.219	3070.8	923.251	0.920434	stat6-/-	5	2
19.5647	73.2198	638.031	1540.3	850.861	241.447	71.2295	361.939	2782.39	1038.91	0.926468	stat6-/-	5	2
49.1976	75.3748	403.98	1326.1	598.863	197.223	88.7355	116.128	2070.5	358.997	0.824681	stat6-/-	5	2
14.2091	76.2689	457.639	1850.48	725.86	165.3	78.1149	294.624	2658.37	808.656	0.924079	stat6-/-	5	2
13.6914	73.5937	453.19	1897.77	780.768	163.988	76.8456	342.954	3109.35	976.332	0.928602	stat6-/-	5	2
29.0956	70.2479	842.087	1485.68	984.705	190.068	79.5514	280.498	2517.57	754.765	0.88068	stat6-/-	5	2
22.1168	71.4327	677.056	1552.14	852.969	214.27	79.3298	253.648	2426.24	704.963	0.909372	stat6-/-	5	2
34.9416	77.1311	368.787	1613.71	622.629	261.371	83.4519	165.043	2157.71	515.142	0.896905	stat6-/-	5	2
32.9605	71.4657	741.73	1363.11	888.262	134.454	84.8962	183.588	1888.67	441.688	0.844528	stat6-/-	5	2
15.8	74.5889	461.426	1692.41	711.269	205.705	74.5489	309.087	2631.53	894.702	0.932775	stat6-/-	5	2
29.9425	72.816	634.207	1534.17	797.264	224	80.5892	215.855	2253.13	616.482	0.888656	stat6-/-	5	2
17.249	75.9217	621.454	2121.62	856.546	194.347	77.2395	287.474	2493.59	773.866	0.93053	Wt	1	3	95
30.0802	75.0702	550.479	2274.97	897.962	312.463	75.2741	261.799	2511.79	815.393	0.917052	Wt	1	3
63.8141	78.7496	416.811	1835.76	665.101	418.515	82.2232	199.481	2052.58	552.197	0.884458	Wt	1	3
31.2185	79.8188	506.267	2588	855.438	370.252	79.6517	284.341	2345.8	701.61	0.925818	Wt	1	3
27.3828	77.3509	528.617	2142.66	771.755	327.695	79.2223	281.192	2401.06	718.351	0.928005	Wt	1	3
32.3257	77.8429	543.613	2071.26	784.952	374.296	76.7209	254.374	2390.25	745.974	0.923778	Wt	1	3
51.4749	75.0166	460.73	1777.82	750.157	351.335	80.6822	197.164	2053.36	563.293	0.875248	Wt	1	3
19.9076	73.116	517.103	1845.06	746.196	244.66	80.2239	318.519	2573.69	752.464	0.93665	Wt	1	3
35.0359	79.2251	474.442	2197.61	771.805	402.141	77.1294	256.166	2400.14	742.936	0.920421	Wt	1	3
46.1622	79.2209	442.78	2150.5	719.149	456.041	79.4471	223.353	2365.99	663.806	0.914087	Wt	1	3
40.347	79.5035	479.21	2152.05	734.556	419.662	78.8075	236.359	2349.4	683.619	0.915007	Wt	1	3
40.4194	84.2375	270.53	2120.04	544.781	282.968	82.2606	99.9133	2309.79	495.28	0.876839	Wt	1	3
40.8378	75.4625	478.858	2107.89	800.685	284.612	80.4712	244.61	2258.84	652.055	0.886404	Wt	1	3
27.8403	60.1176	885.087	2140.39	1296.38	236.492	72.1889	294.189	2658.95	945.41	0.895815	Wt	1	3
53.5857	79.4678	500.669	1810.16	711.515	333.175	82.3792	195.598	2052.93	536.06	0.858973	Wt	1	3
94.5722	82.84	394.923	1799.41	612.069	477.481	86.3599	139.928	1732.69	372.581	0.843784	Wt	1	3
57.4318	85.5918	229.416	1424.71	392.725	305.011	86.8219	98.9702	2198.1	381.074	0.844698	Wt	1	3
24.5757	79.2591	489.71	1778.8	679.807	251.619	82.0226	268.571	2271.78	621.204	0.92378	Wt	1	3
25.847	55.1435	968.457	2429.68	1399.06	194.38	69.4775	447.344	2850.82	1168.66	0.896635	Wt	1	3
23.6568	70.7424	451.371	2269.68	854.27	163.352	72.2322	423.876	3197.06	1154.49	0.88495	Wt	1	3
26.5469	74.6846	628.622	2399.2	977.112	271.432	76.4571	281.696	2473.08	789.157	0.91635	Wt	1	3
30.2727	75.8417	537.187	2175.34	844.512	317.144	76.5738	246.715	2333.7	733.843	0.91466	Wt	1	3
25.5441	72.5108	543.401	2462.13	957.456	297.917	75.4751	283.608	2514.07	820.517	0.92704	Wt	1	3
86.2695	78.0977	428.404	1501.53	643.299	318.413	87.2905	113.201	1697.8	331.395	0.780725	Wt	1	3
34.3568	70.472	540.964	2094.8	899.661	418.786	73.7407	278.912	2425.63	841.767	0.927195	Wt	1	3
32.9388	60.4954	786.752	2209.02	1174.08	284.762	69.4359	293.761	2570.02	984.309	0.904029	Wt	2	3
31.6167	59.6921	969.679	2677.76	1362.6	238.795	66.6252	462.163	3084.58	1296.76	0.892076	Wt	2	3
24.2958	74.0041	575.86	1919.41	838.498	235.904	79.099	268.553	2319.4	691.105	0.915519	Wt	2	3
38.1538	67.8846	636.503	2469.56	1096.76	392.485	74.8003	277.886	2405.59	813.378	0.915104	Wt	2	3
19.4699	75.8884	582.208	1779.78	755.718	203.239	79.6094	283.204	2339.31	690.346	0.912408	Wt	2	3
31.9807	73.5856	606.419	1937.33	867.704	292.072	79.035	269.7	2275.14	688.309	0.9126	Wt	2	3
31.0769	72.03	599.499	2403.8	982.056	323.798	76.2263	268.253	2452.83	780.61	0.919103	Wt	2	3
33.0523	75.8828	529.992	2574.98	923.547	348.126	78.6033	265.345	2377.07	714.199	0.919263	Wt	2	3
29.9014	79.8425	564.315	2974.25	964.109	331.633	80.3064	259.623	2385.69	671.123	0.921459	Wt	2	3
32.784	63.473	654.502	2736.22	1223.26	269.91	69.0237	308.204	2736.42	1051.57	0.904443	Wt	2	3
34.4528	63.8601	758.434	2262.25	1125.53	258.647	72.2225	302.268	2602.12	944.772	0.890172	Wt	2	3
29.6324	73.4359	621.927	1789.6	858.939	281.268	78.3737	276.129	2515.99	741.338	0.913784	Wt	2	3
29.9126	74.0422	591.68	2078.48	883.12	278.272	78.3668	254.841	2413.67	718.02	0.913817	Wt	2	3
13.2746	76.1194	564.393	1800.59	771.43	144.766	78.2778	305.146	2559.23	778.275	0.91975	Wt	2	3
32.4671	72.3447	525.095	2672.6	1028.39	298.09	74.6804	239.544	2466.64	801.866	0.907092	Wt	2	3
13.9346	69.8018	438.925	2588.05	972.331	139.065	77.8607	358.488	2890.47	904.537	0.915001	Wt	2	3
41.0931	82.628	388.639	2047.93	639.264	325.807	82.6193	201.543	2019.9	516.419	0.900021	Wt	2	3
34.4185	77.1728	517.651	2227.24	824.567	360.377	75.6748	250.478	2369.21	762.867	0.919001	Wt	2	3
28.5243	71.2983	557.752	2137.68	910.511	282.052	74.8511	284.884	2579.3	853.577	0.911528	Wt	2	3
31.1597	68.3676	482.351	2301.8	955.964	281.718	73.824	254.683	2520.53	848.553	0.903836	Wt	2	3
32.3167	73.9112	371.16	2354.66	833.003	247.08	76.684	220.292	2658.62	794.506	0.88764	Wt	2	3
33.8032	67.6152	633.619	2275.98	1014.72	329.65	70.9738	271.398	2649.09	955.45	0.915435	Wt	2	3
29.6659	65.8038	691.075	2283.03	1091.29	290.791	72.8512	259.595	2567.58	880.834	0.91442	Wt	2	3
43.9397	78.1662	515.592	1807.98	736.177	326.982	81.5678	240.417	2166.26	607.076	0.896923	Wt	2	3
29.8687	66.2733	710.479	2759.4	1237.9	282.374	71.809	288.475	2548.26	921.584	0.911982	Wt	2	3
33.6842	59.5976	736.473	2518.21	1206.96	303.772	67.9748	284.368	2737.01	1067.17	0.914027	Wt	2	3
29.2799	68.2807	898.932	2949.25	1270.18	292.627	71.592	257.032	2522	894.543	0.918236	Wt	2	3
29.8186	61.6164	851.006	2643.04	1285.59	266.408	68.6313	349.164	2808.9	1104.5	0.908947	Wt	2	3
36.4216	61.7635	967.949	1884.74	1174.17	255.015	74.8983	327.588	2717.66	909.801	0.878566	Wt	2	3
28.0987	66.6286	655.693	2244.94	1050.98	298.585	71.977	240.904	2467.74	863.038	0.920998	Wt	2	3
47.0298	81.2708	449.924	2146.09	713.479	391.134	80.815	223.053	2238.89	619.676	0.90183	Wt	2	3
33.2512	76.5169	530.759	2096.69	810.887	316.599	80.642	263.182	2310.94	653.011	0.913007	Wt	2	3
30.7378	56.3038	1092.1	2537.54	1421.74	236.077	66.8212	488.226	3050.81	1325.68	0.898381	Wt	2	3
37.2298	65.2556	576.272	2421.2	1099.82	333.953	75.9364	268.064	2466.47	790.777	0.905333	Wt	2	3
29.1104	57.1335	874.221	2511.25	1313.87	224.386	68.5604	507.134	3050.28	1286.56	0.897229	Wt	2	3
19.137	70.5435	587.79	2045.59	916.863	230.23	77.1955	279.088	2490.63	767.259	0.941262	Wt	3	3
33.2552	74.3396	479.826	2074.85	802.41	339.808	76.3385	278.113	2487.15	802.723	0.922023	Wt	3	3
27.7287	69.1192	583.997	2121.57	986.963	246.949	75.3822	267.221	2640.32	849.917	0.895564	Wt	3	3
24.7052	71.4952	574.379	2298.04	972.93	278.737	75.2555	271.552	2495.48	816.098	0.923384	Wt	3	3
30.1519	66.7973	677.253	2285.83	1050.77	287.777	74.4765	368.799	2734.19	961.107	0.91199	Wt	3	3
25.0809	61.639	536.242	2431.18	1134.89	264.612	69.6338	312.019	2676.43	1022.36	0.920849	Wt	3	3
19.1504	77.9127	553.145	2685.64	925.425	252.03	77.4729	304.458	2562.41	802.252	0.932803	Wt	3	3
23.3249	72.8899	671.975	1996.38	923.871	273.77	74.7457	303.348	2647.66	886.153	0.925694	Wt	3	3
23.8065	66.6125	566.862	1972.51	903.819	310.177	75.7627	328.424	2975.49	965.815	0.936155	Wt	3	3
50.8263	74.3007	463.028	1866.17	760.471	430.77	79.9497	275.48	2242.87	671.736	0.900267	Wt	3	3
28.7288	64.6657	684.862	2501.57	1150.42	253.751	68.2742	357.614	2605.05	1059.43	0.907543	Wt	3	3
30.4545	70.5864	702.389	2168.87	1015.78	271.123	74.6326	277.395	2371.66	809.017	0.903456	Wt	3	3
25.8246	67.7783	713.304	2153.27	1010.63	247.305	75.275	317.646	2445.06	851.297	0.909429	Wt	3	3
31.2404	76.7341	534.631	2142.33	835	346.079	79.4977	265.594	2300.98	685.102	0.919256	Wt	3	3
20.8931	74.2431	588.579	1728.18	811.114	203.715	79.1769	275.936	2435.94	719.269	0.896135	Wt	3	3
22.0939	71.9604	716.229	1729.26	886.63	159.958	80.9343	315.258	2454.73	707.364	0.866474	Wt	3	3
31.6193	62.3258	702.473	2047.38	1098.23	274.673	71.8433	329.12	2609.04	967.862	0.90101	Wt	3	3
45.4955	71.2751	653.07	1954.88	959.415	275.463	77.9267	228.996	2348.81	713.516	0.859312	Wt	3	3
29.9333	65.4859	734.748	2333.99	1146.63	251.11	73.9612	274.837	2511.35	855.174	0.895995	Wt	3	3
28.564	71.6778	639.857	2419.42	986.05	310.448	73.7395	286.279	2444.02	842.009	0.922101	Wt	4	3
28.879	68.177	545.533	2243.37	965.983	315.685	74.0722	291.422	2465.48	847.983	0.922951	Wt	4	3
27.8293	64.6761	626.599	2259.84	1116.28	342.171	73.0107	303.572	2555.97	906.484	0.929144	Wt	4	3
32.3438	69.6659	675.196	2090.19	998.905	284.753	76.5214	262.215	2408.39	770.483	0.906594	Wt	4	3
30.6971	73.5476	561.833	2741.66	1028.76	291.3	76.8819	262.388	2417.29	759.164	0.90912	Wt	4	3
21.6936	72.1745	678.805	1549.36	858.409	174.889	82.3363	251.96	2339.91	610.703	0.8604	Wt	4	3
29.4224	71.509	619.42	2303.11	978.59	266.766	74.4338	282.098	2593.81	869.671	0.904852	Wt	4	3
27.2449	69.2596	622.761	2133.03	956.633	315.476	75.2831	331.157	2474.51	853.794	0.925658	Wt	4	3
50.7787	80.7377	356.036	1546.73	564.625	240.484	88.2618	126.709	1845.29	353.635	0.81732	Wt	4	3
36.491	67.7609	632.497	2012.77	1005.01	268.16	74.2104	277.16	2542.61	873.67	0.877112	Wt	4	3
29.9982	77.5586	496.683	1936.31	747.324	347.584	79.1723	242.696	2298.71	667.638	0.924937	Wt	4	3
36.8274	66.383	737.686	1947.92	1048.47	289.978	75.4609	265.849	2216.74	747.748	0.885342	Wt	4	3
24.5723	55.702	786.63	2535.21	1350.76	205.365	66.0735	591.998	3332.81	1464.68	0.902104	Wt	4	3
26.7711	79.766	482.053	1948.02	700.407	316.689	81.2798	263.017	2251.51	635.191	0.92246	Wt	4	3
27.2084	75.449	568.076	2271.23	877.482	345.441	76.7566	285.7	2435.13	777.852	0.932736	Wt	4	3
7.8655	75.3615	468.738	1731.88	726.317	83.9713	80.0933	342.506	2505.21	747.171	0.968574	Wt	4	3
39.5966	78.1496	381.446	1756.96	622.923	324.683	78.7685	174.765	2288.01	634.525	0.899103	stat6-/-	1	3	102
66.8896	75.2213	433.862	1663.89	705.965	309.663	82.7781	153.917	1996.42	495.622	0.837647	stat6-/-	1	3
62.591	72.7699	503.183	1719.05	794.277	433.224	78.6666	211.428	2251.33	645.391	0.882422	stat6-/-	1	3
33.9823	82.9066	294.803	1805.87	525.397	198.161	83.0102	136.722	2302.83	516.747	0.85614	stat6-/-	1	3
29.2471	74.944	443.09	2073.99	801.444	234.537	75.041	253.184	2606.22	844.587	0.895939	stat6-/-	1	3
32.7189	76.1101	476.086	1746.93	725.759	225.046	77.131	218.288	2457.49	732.017	0.878665	stat6-/-	1	3
50.3304	80.2716	329.277	1577.22	540.038	338.835	81.4184	170.73	2258.88	577.132	0.874066	stat6-/-	1	3
27.4903	74.0935	442.737	2147.26	802.552	312.71	72.4742	248.379	2607.83	894.531	0.921189	stat6-/-	1	3
39.4903	78.9411	478.199	1800.74	696.224	355.854	77.7137	209.677	2228.07	673.15	0.904575	stat6-/-	1	3
28.5745	74.2216	513.9	1954.81	810.809	316.491	73.8499	254.323	2523.04	845.392	0.921537	stat6-/-	1	3
29.7402	76.1024	564.366	2010.47	814.499	211.824	76.235	275.06	2488.57	816.36	0.879014	stat6-/-	1	3
24.0684	72.2961	497.785	2462.78	936.869	251.338	72.9227	299.88	2751.86	954.942	0.918537	stat6-/-	1	3
19.2517	67.8747	514.65	2127.57	940.147	209.912	68.0331	445.618	3008.54	1253.03	0.919806	stat6-/-	1	3
20.6685	73.0638	530.03	2229.16	878.525	246.281	71.3891	340.171	2774.67	1022.67	0.92645	stat6-/-	1	3
24.8398	81.1427	503.799	2025.81	709.885	351.254	79.4866	286.348	2387.63	712.013	0.93765	stat6-/-	1	3
13.3196	78.2475	354.758	1508.96	530.152	118.562	80.6477	255.447	2590.31	687.194	0.904515	stat6-/-	1	3
17.3095	70.4482	479.811	2397.02	930.758	211.19	74.1802	261.472	2650.88	868.213	0.930344	stat6-/-	1	3
24.2034	72.8162	571.222	2237.23	921.847	297.007	73.9191	284.447	2676.87	904.457	0.92972	stat6-/-	1	3
28.5594	75.1437	496.933	2190.95	829.394	263.23	74.9374	262.121	2516.78	830.015	0.907489	stat6-/-	1	3
25.1186	66.655	651.607	1983.99	996.683	225.034	70.0587	293.216	2647.98	996.874	0.910193	stat6-/-	1	3
16.7097	64.4677	406.716	2054.81	907.505	175.022	70.526	368.428	2951.78	1110.74	0.917979	stat6-/-	1	3
17.8501	70.6465	564.212	2228.14	952.545	182.84	71.2039	344.185	2893.84	1062.15	0.916069	stat6-/-	1	3
22.8232	73.7796	530.678	1789.21	794.237	233.058	77.362	280.723	2454.14	765.184	0.917253	stat6-/-	1	3
17.1727	65.4045	761.686	2515.79	1173.86	186.8	69.3312	572.335	3224.83	1340.7	0.921051	stat6-/-	2	3
20.8306	67.6427	523.858	2443.85	1029.25	261.517	71.7326	319.457	2812.94	1019.8	0.930629	stat6-/-	2	3
56.5625	74.6131	470.83	1609.28	679.685	350.375	80.3518	178.892	2091.05	555.646	0.876593	stat6-/-	2	3
19.4647	68.8191	570.625	2312.34	995.904	248.609	69.0104	468.063	2922.46	1197.28	0.932	stat6-/-	2	3
20.0612	64.5771	543.127	2195.72	965.136	211.682	71.9259	360.117	2860.44	1055.56	0.92176	stat6-/-	2	3
22.427	72.9675	535.078	1983.72	840.847	213.797	74.5384	290.864	2535.9	862.739	0.909175	stat6-/-	2	3
17.1833	62.5366	704.791	2543.1	1146.64	163.383	69.0512	515.032	3006.5	1263.85	0.916608	stat6-/-	2	3
78.1191	58.1113	1124.79	2236.02	1420.58	280.784	70.0534	318.546	2403	933.988	0.827159	stat6-/-	2	3
14.6754	63.5258	710.544	1995.67	1052.18	133.236	73.4503	600.165	3319.86	1292.62	0.91104	stat6-/-	2	3
17.8491	71.4704	685.434	1925.12	914.565	203.547	73.9184	392.755	2738.28	989.947	0.925023	stat6-/-	2	3
25.9279	76.7654	493.311	1973.83	779.601	326.346	78.2874	262.882	2350.26	712.942	0.920574	stat6-/-	2	3
38.2174	75.0784	509.859	1946.61	815.074	413.246	77.3402	247.16	2606.25	781.43	0.919026	stat6-/-	2	3
94.7407	74.3401	419.096	1635.36	721.026	440	84.9494	124.66	1911.14	405.378	0.82365	stat6-/-	2	3
57.4476	76.382	380.141	2014.67	699.999	437.467	77.5613	220.577	2495.12	731.487	0.891368	stat6-/-	2	3
34.311	72.3369	545.203	1858.97	845.929	246.378	74.3951	256.495	2504.43	833.618	0.883915	stat6-/-	2	3
46.9046	74.7433	430.174	1856.19	720.231	371.695	78.4373	213.795	2280.33	661.499	0.897693	stat6-/-	2	3
37.523	76.2885	427.641	1976.19	755.812	282.629	77.0239	225.039	2490.29	748.206	0.890236	stat6-/-	2	3
31.9325	78.6216	420.594	1939.81	701.458	259.194	80.1927	214.013	2198.57	607.363	0.880601	stat6-/-	2	3
33.8175	73.2728	467.573	2073.69	843.51	279.308	77.2596	225.123	2433.38	733.736	0.897887	stat6-/-	2	3
26.989	75.7371	442.056	2022.59	772.685	203.915	76.9788	243.397	2550.72	770.864	0.889649	stat6-/-	2	3
33.9448	78.377	434.292	1950.85	714.536	258.683	78.3551	206.643	2395.41	682.323	0.890184	stat6-/-	2	3
31.726	73.3196	432.968	2098.14	823.816	235.366	76.6455	242.547	2445.92	760.6	0.888144	stat6-/-	2	3
86.2058	80.9243	377.592	1768.98	624.622	346.605	86.2037	122.988	1878.55	373.796	0.799845	stat6-/-	2	3
36.2984	68.6061	372.111	1773.53	767.38	270.503	74.3379	222.182	2534.54	819.457	0.891014	stat6-/-	2	3
31.5498	73.5805	423.049	1770.68	730.433	272.833	78.5558	225.255	2358.56	681.788	0.901589	stat6-/-	2	3
23.5469	78.3654	501.187	2093.75	741.403	309.552	77.3505	271.029	2351.76	741.692	0.933364	stat6-/-	2	3
39.5586	73.9786	441.506	1765.06	757.513	408.387	76.3188	239.13	2400.89	747.244	0.915887	stat6-/-	2	3
67.6124	72.1429	618.235	1781	873.613	400.211	78.8709	176.429	2151.08	611.166	0.865957	stat6-/-	2	3
29.1736	73.2405	487.025	1819.38	779.179	206.215	76.4061	297.716	2400.6	793.435	0.886497	stat6-/-	2	3
44.6864	83.4515	339.81	1862.6	574.152	284.929	82.4795	157.346	2152.96	512.704	0.85913	stat6-/-	2	3
31.9524	76.9066	549.425	1762.6	769.946	200.539	80.3956	222.893	2285.38	623.979	0.869938	stat6-/-	2	3
35.5913	73.4923	543.977	1853.76	826.479	336.484	76.4414	236.135	2471.73	762.642	0.90603	stat6-/-	2	3
51.8569	76.1683	430.779	1816.23	715.818	375.09	77.7298	192.088	2290.14	664.158	0.881713	stat6-/-	2	3
55.4398	75.8414	466.626	1785.78	742.819	303.764	79.7941	178.708	2113.36	583.607	0.849067	stat6-/-	2	3
44.5227	73.2776	446.264	1692.8	742.474	261.096	81.1949	172.548	2240.05	569.973	0.858238	stat6-/-	2	3
98.9207	71.7794	752.326	1473.43	902.343	284.915	85.3892	138.472	1734.64	398.267	0.764559	stat6-/-	2	3
24.0782	74.7581	559.76	1915.51	842.375	280.823	74.0396	257.13	2559.49	846.354	0.919466	stat6-/-	2	3
39.7214	77.462	481.617	1805.9	716.999	341.907	78.5016	222.508	2300.07	679.401	0.904264	stat6-/-	2	3
16.8772	79.9039	325.665	1554.27	538.259	82.5731	85.8175	212.302	2104.49	474.941	0.834168	stat6-/-	2	3
23.4059	74.9135	562.765	1859.25	812.636	282.161	78.3416	273.302	2391.81	724.865	0.927317	stat6-/-	3	3
29.7085	73.1082	594.923	1766.2	825.528	328.837	77.192	250.057	2331.88	723.308	0.920426	stat6-/-	3	3
103.304	75.6765	402.922	1742.52	708.728	450.557	84.5561	133.688	1901.87	414.511	0.816025	stat6-/-	3	3
30.3831	75.9697	452.137	2039.16	766.541	380.409	76.3363	248.705	2564.71	791.678	0.930052	stat6-/-	3	3
18.1062	73.0758	494.236	1979.19	833.293	211.611	75.1315	261.118	2753.38	867.403	0.926929	stat6-/-	3	3
59.7765	79.5311	350.126	1674.47	599.666	257.756	84.1534	147.135	2061.89	460.672	0.818297	stat6-/-	3	3
85.8795	73.231	461.265	1670.04	767.442	358.754	84.07	130.44	1860.8	420.529	0.818612	stat6-/-	3	3
18.4709	76.3366	430.434	1658.46	673.188	190.854	81.421	258.999	2195.32	610.741	0.914377	stat6-/-	3	3
58.3065	79.3707	416.715	1858.7	685.202	465.052	78.9542	201.109	2218.85	632.186	0.894227	stat6-/-	3	3
17.7821	70.7753	368.456	1769.96	702.878	177.167	71.7603	420.747	3000.51	1132.38	0.91744	stat6-/-	3	3
93.1732	77.9738	389.054	1938.6	695.893	432.298	82.4473	135.79	2048.53	477.502	0.827732	stat6-/-	3	3
29.8398	80.3722	333.994	1702.3	569.227	156.318	83.6919	193.624	2210.72	517.741	0.844019	stat6-/-	3	3
65.8538	76.1808	379.177	2009.83	741.249	417.687	77.4766	178.848	2202.25	640.187	0.87024	stat6-/-	3	3
55.0597	78.9294	345.55	1765.19	619.224	293.231	80.4383	156.649	2182.19	558.911	0.851388	stat6-/-	3	3
21.7349	72.5715	543.318	2289.42	910.663	226.518	69.6256	371.518	2941.55	1133.65	0.92015	stat6-/-	3	3
28.1489	78.6802	491.458	1990.47	718.274	281.979	72.1238	260.414	2503.67	880.183	0.918404	stat6-/-	3	3
80.7239	77.6776	493.342	1590.82	698.845	274.868	86.3223	144.614	1868.15	395.666	0.795338	stat6-/-	3	3
105.857	74.5198	378.879	1756.17	703.648	428.504	82.6079	139.491	1986.57	471.876	0.816857	stat6-/-	3	3
36.6489	78.6314	437.267	1790.11	675.043	315.881	80.821	221.867	2221.93	613.655	0.908008	stat6-/-	3	3
22.535	75.4718	577.851	2575.74	959.05	284.025	76.5288	287.856	2488.51	801.864	0.930661	stat6-/-	3	3
116.167	75.8017	459.306	1878.12	786.589	443.87	85.6503	127.744	1819.03	388.24	0.810129	stat6-/-	3	3
104.38	76.6448	408.542	1740.7	707.529	428.916	84.0003	143.725	1873.33	437.7	0.819351	stat6-/-	3	3
19.3938	74.1516	463.565	2354.94	857.519	224.766	75.2774	420.82	2886.42	1021.47	0.922676	stat6-/-	3	3
25.2381	76.9019	537.814	2082.33	802.288	319.472	75.8509	277.595	2500.48	813.939	0.931753	stat6-/-	3	3
18.6279	73.0228	558.056	2235.65	888.207	212.047	66.5984	423.277	3080.29	1281.69	0.927272	stat6-/-	3	3
11.4859	77.4345	503.975	1735.38	690.019	145.105	80.946	290.131	2460.25	687.486	0.942226	stat6-/-	3	3
12.1407	73.0915	479.006	1597.14	721.919	127.301	80.0741	319.339	2619.34	746.772	0.921356	stat6-/-	4	3
29.8169	76.9492	551.83	2130.94	846.622	293.336	78.097	263.394	2529.58	753.169	0.906657	stat6-/-	4	3
75.4765	79.4485	405.187	1984.56	696.04	394.937	81.5506	177.004	2052.91	550.188	0.85233	stat6-/-	4	3
158.625	80.6631	362.716	1665.07	614.869	434.609	91.9383	76.8861	1572.26	208.705	0.750393	stat6-/-	4	3
49.6842	81.7388	326.315	1786.64	558.822	332.045	83.2595	157.279	2330.62	531.898	0.878405	stat6-/-	4	3
114.766	76.739	433.41	1659.57	699.778	424.048	86.7914	126.477	1861.24	384.523	0.804006	stat6-/-	4	3
18.9363	70.9085	711.903	1664.59	890.816	128.112	79.1035	276.094	2341.52	699.827	0.883592	stat6-/-	4	3
59.3728	75.9642	454.6	1646.24	714.388	295.965	84.1472	161.066	2067.17	492.789	0.828059	stat6-/-	4	3
60.7192	74.9302	491.997	1913.07	792.389	310.467	80.0903	175.859	2132.94	604.451	0.834687	stat6-/-	4	3
27.1041	77.4027	494.505	1784.76	708.558	294.699	80.8728	256.741	2360.5	653.556	0.920297	stat6-/-	4	3
27.8832	76.2349	567.659	1668.37	766.17	279.394	80.76	263.987	2280.16	645.076	0.914315	stat6-/-	4	3
42.1373	68.8663	572.653	1982.28	959.63	299.953	75.3443	209.786	2357.16	759.441	0.883946	stat6-/-	4	3
25.7352	75.4146	497.517	2006.69	771.811	294.988	78.2909	256.155	2364.6	710.765	0.925053	stat6-/-	4	3
28.2075	64.4842	625.303	2381.52	1088.22	251.269	65.8868	358.769	2830.48	1186.8	0.910172	stat6-/-	4	3

## Sheet: 6E-OMI index
Group	Fish	Repeat	OMI index
Wt	1	2	1.20648
Wt	1	2	1.18696
Wt	1	2	1.32396
Wt	1	2	1.26983
Wt	1	2	0.912286
Wt	1	2	1.12615
Wt	1	2	1.26026
Wt	1	2	1.07705
Wt	1	2	0.86978
Wt	1	2	1.53328
Wt	1	2	1.75499
Wt	1	2	1.10393
Wt	1	2	0.88787
Wt	1	2	0.875064
Wt	2	2	0.83229
Wt	2	2	0.81597
Wt	2	2	0.69792
Wt	2	2	0.623881
Wt	2	2	0.955564
Wt	2	2	0.863555
Wt	2	2	1.07217
Wt	2	2	0.985977
Wt	2	2	1.02119
Wt	2	2	0.942222
Wt	2	2	0.986516
Wt	2	2	0.878289
Wt	2	2	0.863601
Wt	3	2	0.800527
Wt	3	2	0.978541
Wt	3	2	1.44254
Wt	3	2	0.823398
Wt	3	2	0.926326
Wt	3	2	0.854377
Wt	3	2	0.663239
Wt	3	2	0.624423
Wt	3	2	0.895253
Wt	3	2	0.880253
Wt	3	2	0.894805
Wt	3	2	1.13577
Wt	3	2	0.882885
Wt	3	2	0.845326
Wt	3	2	0.986068
Wt	3	2	0.766312
Wt	3	2	0.818142
Wt	4	2	0.85134
Wt	4	2	0.980181
Wt	4	2	0.827285
Wt	4	2	0.873221
Wt	4	2	0.829379
Wt	4	2	1.01921
Wt	4	2	0.781281
Wt	4	2	0.711258
Wt	4	2	0.881789
Wt	4	2	0.891242
Wt	4	2	0.760329
Wt	4	2	0.783785
Wt	4	2	0.910337
Wt	4	2	0.576929
Wt	4	2	0.654639
Wt	4	2	0.768529
Wt	4	2	1.15959
Wt	5	2	1.36207
Wt	5	2	0.970935
Wt	5	2	1.05593
Wt	5	2	1.01541
Wt	5	2	0.99891
Wt	5	2	0.921991
Wt	5	2	0.981354
Wt	5	2	1.00884
Wt	5	2	0.942085
Wt	5	2	0.911781
Wt	5	2	0.678054
Wt	1	1	1.51635
Wt	1	1	1.37397
Wt	1	1	1.70023
Wt	1	1	1.49243
Wt	1	1	1.73683
Wt	1	1	2.08164
Wt	1	1	1.53319
Wt	1	1	2.31056
Wt	1	1	1.58532
Wt	1	1	1.52006
Wt	1	1	0.639886
Wt	1	1	2.52465
Wt	1	1	1.46815
Wt	1	1	1.60545
Wt	1	1	1.02238
Wt	1	1	1.90032
Wt	1	1	0.760298
Wt	1	1	1.73568
Wt	1	1	1.88418
Wt	1	1	2.21399
Wt	2	1	1.02615
Wt	2	1	1.63397
Wt	2	1	2.27704
Wt	2	1	2.30198
Wt	2	1	1.16881
Wt	2	1	0.975602
Wt	2	1	2.60336
Wt	2	1	1.41219
Wt	2	1	2.25058
Wt	2	1	2.06139
Wt	2	1	2.70986
Wt	2	1	1.10051
Wt	2	1	1.93342
Wt	2	1	0.761111
Wt	2	1	1.6938
Wt	2	1	1.04666
Wt	2	1	1.17416
Wt	2	1	2.52549
Wt	2	1	1.38029
Wt	2	1	1.47277
Wt	2	1	1.10339
Wt	2	1	2.03389
Wt	2	1	1.22705
Wt	2	1	1.53753
Wt	2	1	1.64932
Wt	2	1	1.30313
Wt	2	1	0.699729
Wt	3	1	1.26941
Wt	3	1	0.984171
Wt	3	1	0.855738
Wt	1	3	0.886995
Wt	1	3	0.870103
Wt	1	3	0.807935
Wt	1	3	0.793489
Wt	1	3	0.924784
Wt	1	3	0.937343
Wt	1	3	0.701634
Wt	1	3	1.00974
Wt	1	3	0.946827
Wt	1	3	0.909568
Wt	1	3	0.915287
Wt	1	3	0.884222
Wt	1	3	0.758949
Wt	1	3	0.493356
Wt	1	3	0.699674
Wt	1	3	0.608302
Wt	1	3	0.903165
Wt	1	3	0.918247
Wt	1	3	0.638827
Wt	1	3	1.31191
Wt	1	3	0.734521
Wt	1	3	0.835239
Wt	1	3	0.810704
Wt	1	3	0.44686
Wt	1	3	0.911907
Wt	2	3	0.708727
Wt	2	3	0.839882
Wt	2	3	0.7909
Wt	2	3	0.60867
Wt	2	3	0.893424
Wt	2	3	0.746467
Wt	2	3	0.72058
Wt	2	3	0.713876
Wt	2	3	0.610445
Wt	2	3	0.729177
Wt	2	3	0.706975
Wt	2	3	0.824938
Wt	2	3	0.764791
Wt	2	3	0.990442
Wt	2	3	0.673802
Wt	2	3	0.882446
Wt	2	3	0.814156
Wt	2	3	0.901849
Wt	2	3	0.895171
Wt	2	3	0.821692
Wt	2	3	0.895435
Wt	2	3	0.891387
Wt	2	3	0.698721
Wt	2	3	0.798098
Wt	2	3	0.557255
Wt	2	3	0.780225
Wt	2	3	0.488924
Wt	2	3	0.719384
Wt	2	3	0.587854
Wt	2	3	0.73599
Wt	2	3	0.848502
Wt	2	3	0.77648
Wt	2	3	0.806403
Wt	2	3	0.565819
Wt	2	3	0.895892
Wt	3	3	0.812795
Wt	3	3	0.983303
Wt	3	3	0.774167
Wt	3	3	0.781176
Wt	3	3	0.848029
Wt	3	3	0.825251
Wt	3	3	0.835794
Wt	3	3	0.934078
Wt	3	3	1.07049
Wt	3	3	0.850708
Wt	3	3	0.836453
Wt	3	3	0.694932
Wt	3	3	0.760694
Wt	3	3	0.792111
Wt	3	3	0.839725
Wt	3	3	0.694496
Wt	3	3	0.782929
Wt	3	3	0.600179
Wt	3	3	0.574942
Wt	4	3	0.794976
Wt	4	3	0.829253
Wt	4	3	0.714636
Wt	4	3	0.672365
Wt	4	3	0.622552
Wt	4	3	0.6042
Wt	4	3	0.819813
Wt	4	3	0.851549
Wt	4	3	0.616693
Wt	4	3	0.759873
Wt	4	3	0.889974
Wt	4	3	0.556533
Wt	4	3	1.07479
Wt	4	3	0.907542
Wt	4	3	0.867351
Wt	4	3	1.06427
stat6-/-	1	2	1.12736
stat6-/-	1	2	0.985514
stat6-/-	1	2	0.8914
stat6-/-	1	2	0.873147
stat6-/-	1	2	1.14342
stat6-/-	1	2	0.636049
stat6-/-	1	2	0.964581
stat6-/-	1	2	0.796543
stat6-/-	1	2	0.361518
stat6-/-	1	2	0.894085
stat6-/-	1	2	0.794038
stat6-/-	1	2	1.01029
stat6-/-	1	2	1.0643
stat6-/-	1	2	0.933931
stat6-/-	1	2	0.676196
stat6-/-	1	2	0.476633
stat6-/-	1	2	0.883986
stat6-/-	1	2	1.08771
stat6-/-	1	2	0.739139
stat6-/-	1	2	0.958896
stat6-/-	1	2	1.24837
stat6-/-	1	2	0.731419
stat6-/-	1	2	0.787009
stat6-/-	1	2	0.984267
stat6-/-	1	2	0.908914
stat6-/-	1	2	0.630911
stat6-/-	1	2	0.787508
stat6-/-	1	2	0.813032
stat6-/-	1	2	0.747178
stat6-/-	2	2	0.838438
stat6-/-	2	2	0.844985
stat6-/-	2	2	0.847986
stat6-/-	2	2	0.916236
stat6-/-	2	2	0.239223
stat6-/-	2	2	1.03123
stat6-/-	2	2	1.05425
stat6-/-	2	2	1.03903
stat6-/-	2	2	1.2131
stat6-/-	2	2	0.971346
stat6-/-	2	2	1.20676
stat6-/-	2	2	1.15701
stat6-/-	2	2	1.64723
stat6-/-	2	2	0.956273
stat6-/-	2	2	0.439241
stat6-/-	2	2	1.12369
stat6-/-	3	2	1.04776
stat6-/-	3	2	1.2756
stat6-/-	3	2	0.963421
stat6-/-	3	2	0.857014
stat6-/-	3	2	1.19327
stat6-/-	3	2	1.30872
stat6-/-	3	2	1.61655
stat6-/-	3	2	0.992256
stat6-/-	3	2	1.3425
stat6-/-	3	2	0.536772
stat6-/-	3	2	0.393262
stat6-/-	3	2	0.305279
stat6-/-	3	2	0.835156
stat6-/-	3	2	0.909761
stat6-/-	3	2	0.708896
stat6-/-	3	2	1.00841
stat6-/-	3	2	1.0573
stat6-/-	3	2	0.537441
stat6-/-	3	2	0.875897
stat6-/-	3	2	0.281171
stat6-/-	3	2	0.91246
stat6-/-	3	2	1.50461
stat6-/-	3	2	1.25682
stat6-/-	3	2	0.746429
stat6-/-	3	2	1.14484
stat6-/-	3	2	0.86287
stat6-/-	3	2	0.808648
stat6-/-	3	2	0.630656
stat6-/-	3	2	0.633311
stat6-/-	4	2	0.826741
stat6-/-	4	2	1.24118
stat6-/-	4	2	1.12713
stat6-/-	4	2	0.977346
stat6-/-	4	2	1.15474
stat6-/-	4	2	1.48714
stat6-/-	4	2	1.07501
stat6-/-	4	2	1.08255
stat6-/-	4	2	0.981487
stat6-/-	4	2	1.03847
stat6-/-	4	2	0.96376
stat6-/-	4	2	1.44695
stat6-/-	4	2	0.753132
stat6-/-	4	2	0.993765
stat6-/-	4	2	1.47308
stat6-/-	4	2	0.647303
stat6-/-	4	2	0.959905
stat6-/-	4	2	1.35563
stat6-/-	4	2	1.33908
stat6-/-	4	2	0.943233
stat6-/-	4	2	1.00343
stat6-/-	4	2	0.56343
stat6-/-	4	2	1.50824
stat6-/-	4	2	0.937219
stat6-/-	4	2	0.986081
stat6-/-	5	2	0.261387
stat6-/-	5	2	0.753331
stat6-/-	5	2	0.738883
stat6-/-	5	2	1.17192
stat6-/-	5	2	1.09263
stat6-/-	5	2	0.895227
stat6-/-	5	2	0.900522
stat6-/-	5	2	1.18836
stat6-/-	5	2	1.33404
stat6-/-	5	2	1.21889
stat6-/-	5	2	0.587297
stat6-/-	5	2	1.09182
stat6-/-	5	2	1.23409
stat6-/-	5	2	0.642435
stat6-/-	5	2	0.782592
stat6-/-	5	2	0.830599
stat6-/-	5	2	0.338195
stat6-/-	5	2	1.22714
stat6-/-	5	2	0.721703
stat6-/-	1	1	1.11816
stat6-/-	1	1	1.05256
stat6-/-	1	1	1.43432
stat6-/-	1	1	0.559505
stat6-/-	1	1	1.61318
stat6-/-	1	1	0.454991
stat6-/-	1	1	0.77792
stat6-/-	1	1	1.55332
stat6-/-	1	1	1.28761
stat6-/-	1	1	0.326943
stat6-/-	1	1	1.42396
stat6-/-	1	1	1.13753
stat6-/-	1	1	0.992568
stat6-/-	1	1	1.33825
stat6-/-	1	1	1.26258
stat6-/-	1	1	1.39125
stat6-/-	1	1	1.31025
stat6-/-	1	1	1.46519
stat6-/-	1	1	1.12326
stat6-/-	1	1	1.39667
stat6-/-	2	1	1.16225
stat6-/-	2	1	1.33078
stat6-/-	2	1	1.32249
stat6-/-	2	1	1.21157
stat6-/-	2	1	1.24913
stat6-/-	2	1	1.30256
stat6-/-	2	1	1.3528
stat6-/-	2	1	1.32058
stat6-/-	2	1	1.29556
stat6-/-	2	1	1.25877
stat6-/-	2	1	1.41661
stat6-/-	2	1	1.30628
stat6-/-	2	1	1.42314
stat6-/-	2	1	1.47062
stat6-/-	3	1	1.32834
stat6-/-	3	1	1.08951
stat6-/-	3	1	1.21238
stat6-/-	3	1	1.26312
stat6-/-	3	1	1.44784
stat6-/-	3	1	1.26705
stat6-/-	3	1	1.90055
stat6-/-	3	1	1.41062
stat6-/-	3	1	1.25954
stat6-/-	3	1	1.53525
stat6-/-	3	1	1.3782
stat6-/-	3	1	1.49754
stat6-/-	3	1	1.38544
stat6-/-	3	1	1.33076
stat6-/-	3	1	1.29287
stat6-/-	3	1	1.20436
stat6-/-	3	1	1.03879
stat6-/-	3	1	1.27205
stat6-/-	1	3	0.980874
stat6-/-	1	3	0.632974
stat6-/-	1	3	0.754536
stat6-/-	1	3	0.912941
stat6-/-	1	3	1.00758
stat6-/-	1	3	0.946412
stat6-/-	1	3	0.988891
stat6-/-	1	3	1.09618
stat6-/-	1	3	0.940223
stat6-/-	1	3	1.02489
stat6-/-	1	3	0.936896
stat6-/-	1	3	0.994751
stat6-/-	1	3	1.362
stat6-/-	1	3	1.16297
stat6-/-	1	3	1.00753
stat6-/-	1	3	1.17209
stat6-/-	1	3	0.908069
stat6-/-	1	3	0.963883
stat6-/-	1	3	0.966207
stat6-/-	1	3	0.960296
stat6-/-	1	3	1.22549
stat6-/-	1	3	1.10487
stat6-/-	1	3	0.941961
stat6-/-	2	3	1.17037
stat6-/-	2	3	0.969381
stat6-/-	2	3	0.784654
stat6-/-	2	3	1.2343
stat6-/-	2	3	1.08673
stat6-/-	2	3	0.993912
stat6-/-	2	3	1.10519
stat6-/-	2	3	0.242583
stat6-/-	2	3	1.25673
stat6-/-	2	3	1.07421
stat6-/-	2	3	0.899691
stat6-/-	2	3	0.937185
stat6-/-	2	3	0.48595
stat6-/-	2	3	0.99312
stat6-/-	2	3	0.923166
stat6-/-	2	3	0.887115
stat6-/-	2	3	0.940533
stat6-/-	2	3	0.825187
stat6-/-	2	3	0.817787
stat6-/-	2	3	0.946219
stat6-/-	2	3	0.911992
stat6-/-	2	3	0.865766
stat6-/-	2	3	0.54484
stat6-/-	2	3	1.01492
stat6-/-	2	3	0.903451
stat6-/-	2	3	0.998912
stat6-/-	2	3	0.965604
stat6-/-	2	3	0.591304
stat6-/-	2	3	0.962356
stat6-/-	2	3	0.848268
stat6-/-	2	3	0.745525
stat6-/-	2	3	0.884708
stat6-/-	2	3	0.878386
stat6-/-	2	3	0.70728
stat6-/-	2	3	0.700976
stat6-/-	2	3	0.177365
stat6-/-	2	3	0.983016
stat6-/-	2	3	0.920807
stat6-/-	2	3	0.820046
stat6-/-	3	3	0.879308
stat6-/-	3	3	0.853076
stat6-/-	3	3	0.504712
stat6-/-	3	3	1.02483
stat6-/-	3	3	1.02916
stat6-/-	3	3	0.705407
stat6-/-	3	3	0.439219
stat6-/-	3	3	0.903372
stat6-/-	3	3	0.892121
stat6-/-	3	3	1.51605
stat6-/-	3	3	0.612485
stat6-/-	3	3	0.844116
stat6-/-	3	3	0.803048
stat6-/-	3	3	0.838829
stat6-/-	3	3	1.25226
stat6-/-	3	3	1.18413
stat6-/-	3	3	0.471126
stat6-/-	3	3	0.583417
stat6-/-	3	3	0.897526
stat6-/-	3	3	0.789506
stat6-/-	3	3	0.36499
stat6-/-	3	3	0.538742
stat6-/-	3	3	1.18443
stat6-/-	3	3	1.00818
stat6-/-	3	3	1.47296
stat6-/-	3	3	1.00781
stat6-/-	4	3	1.01706
stat6-/-	4	3	0.847626
stat6-/-	4	3	0.72983
stat6-/-	4	3	0.297603
stat6-/-	4	3	0.913286
stat6-/-	4	3	0.465704
stat6-/-	4	3	0.698728
stat6-/-	4	3	0.607938
stat6-/-	4	3	0.653177
stat6-/-	4	3	0.917414
stat6-/-	4	3	0.825835
stat6-/-	4	3	0.684251
stat6-/-	4	3	0.912019
stat6-/-	4	3	1.07783

## Sheet: FLIM statistics
Statistical results of zebrafish autofluorescence data
Mean+/-95%CI
Comparison between groups showing the overall effect; computed as fold change (ratio) or simple difference with 95%CI and p values; p<0.05
FIGURE 6	NAD(P)H tm (ps)	NAD(P)H t1 (ps)	NAD(P)H t2 (ps)	NAD(P)H a1 (%)	FAD tm (ps)	FAD t1 (ps)	FAD t2 (ps)	FAD a1 (%)*	Optical redox ratio	OMI index
Wild-type	935 (871, 998)	331 (288, 375)	2647 (2567, 2727)	74.1 (72.8, 75.5)	828 (769, 888)	492 (454, 530)	2034 (1941, 2128)	72.4 (70.5, 74.3)	0.914 (0.908, 0.921)	1.11 (1.043, 1.17)
stat6-/-	806 (757, 856)	301 (276, 326)	2524 (2439, 2608)	77.7 (76.8, 78.6)	747 (718, 776)	480 (435, 525)	1795 (1710, 1881)	74.4 (73.4, 75.4)	0.894 (0.882, 0.907)	1.03 (0.956, 1.10)
stat6-/- - Wt; p value	-128 (-209, -47.9); 0.004	-30.4 (-80.6, 19.8); 0.219	-123 (-239, -6.69); 0.039	3.54 (1.88, 5.20); <0.001	-81.1 (-147, -14.9); 0.019	-11.8 (-70.7, 47.0); 0.678	-239 (-336, -112); 0.001	2.03 (-0.14, 4.2); 0.065	-0.020 (-0.034, -.0.006); 0.008	-0.077 (-0.173, 0.0186); 0.108

## Sheet: 6H-Metformin, wound healing
replicate	condition	tail fin area (um2)
1	Control	75190.3
1	Control	60237.1
1	Control	66913.9
1	Control	66292
1	Control	88523.4
1	Control	58169.2
1	Control	73710.8
1	Control	79716
1	Control	73354.3
1	Control	81518.5
1	Control	78244.8
1	Control	86155.4
1	Control	88130
1	Control	72284
1	Control	74997.6
1	Control	76302
1	Control	88964.5
1	Control	93044.5
1	Control	85272.5
1	Control	82410.7
1	Control	80264.6
1	Control	71679.7
1	Control	75875.8
1	Control	97732.4
1	Metformin	91984.2
1	Metformin	77134.8
1	Metformin	73962.8
1	Metformin	102033
1	Metformin	71366
1	Metformin	103392
1	Metformin	88727
1	Metformin	74826.5
1	Metformin	87332.4
1	Metformin	82710.5
1	Metformin	86160
1	Metformin	109542
1	Metformin	98736.6
1	Metformin	84549.2
1	Metformin	93784.4
1	Metformin	98860.7
1	Metformin	98836.1
1	Metformin	96430.3
1	Metformin	89618.5
1	Metformin	83951.6
1	Metformin	86507.6
1	Metformin	91393.2
1	Metformin	91556.3
1	Metformin	68388.1
1	Metformin	82468.1
2	Control	53787.8
2	Control	92593.8
2	Control	90561.7
2	Control	63127.1
2	Control	54265
2	Control	51858.9
2	Control	78073
2	Control	84537.9
2	Control	61904.9
2	Control	44138
2	Control	65058.6
2	Control	75849.6
2	Control	76713.2
2	Control	79700.1
2	Control	91830.6
2	Control	95566.4
2	Control	79501.8
2	Control	60652.6
2	Control	88599.3
2	Control	93258.7
2	Metformin	89372.1
2	Metformin	104606
2	Metformin	92063.8
2	Metformin	78388.7
2	Metformin	87376.5
2	Metformin	93922.7
2	Metformin	99404.6
2	Metformin	96826
2	Metformin	90845.3
2	Metformin	93267.3
2	Metformin	111644
2	Metformin	71369.3
2	Metformin	56854.5
2	Metformin	56652.6
2	Metformin	73990.7
2	Metformin	80754.1
2	Metformin	56514.9
2	Metformin	83816.6
2	Metformin	96858.1
2	Metformin	102110
3	Control	60080
3	Control	77648
3	Control	90396.4
3	Control	96083.6
3	Control	82156.4
3	Control	93966.2
3	Control	62906.7
3	Control	100215
3	Control	100114
3	Control	85742.2
3	Control	92919.1
3	Control	77916.4
3	Control	73456
3	Control	86334.2
3	Control	85552
3	Metformin	89576.9
3	Metformin	105321
3	Metformin	106841
3	Metformin	100372
3	Metformin	97962.7
3	Metformin	108233
3	Metformin	98848
3	Metformin	71927.1
3	Metformin	94261.3
3	Metformin	97875.6
3	Metformin	105220
3	Metformin	130336
3	Metformin	89937.8
3	Metformin	81240.9
3	Metformin	83340.4

## Sheet: 6J-stat6, wound healing
repeat	condition	tail fin area (um2)
1	wt	99218.8
1	wt	86892
1	wt	93118.4
1	wt	97771.2
1	wt	82550.3
1	wt	88011.6
1	wt	96675.4
1	wt	83325.7
1	wt	90382
1	wt	67804.4
1	wt	72851.1
1	wt	77031.3
1	wt	95736.5
1	wt	89281.9
1	wt	85500.7
1	wt	112421
1	stat6-/-	81127.5
1	stat6-/-	92387.1
1	stat6-/-	80268.9
1	stat6-/-	70338.9
1	stat6-/-	72509.9
1	stat6-/-	84196.3
1	stat6-/-	69824.8
1	stat6-/-	72685.3
1	stat6-/-	59202.3
1	stat6-/-	91932.1
2	wt	94102.4
2	wt	94665.6
2	wt	78793
2	wt	77486.3
2	wt	88367.5
2	wt	75848.3
2	wt	66946.4
2	wt	61582.9
2	wt	88748.6
2	stat6-/-	74716
2	stat6-/-	73114.1
2	stat6-/-	91569.9
2	stat6-/-	69086.6
2	stat6-/-	60346.5
2	stat6-/-	97449.8
2	stat6-/-	53814.9
2	stat6-/-	71314.6
3	wt	100103
3	wt	99748.8
3	wt	88189.1
3	wt	98041.5
3	wt	105278
3	wt	95067.9
3	wt	70520
3	wt	90438
3	wt	97626.6
3	wt	96738.4
3	wt	82831.6
3	stat6-/-	65358.1
3	stat6-/-	61564.3
3	stat6-/-	91726.5
3	stat6-/-	94735.6
3	stat6-/-	84332.6
3	stat6-/-	69109.8
